# Supplementary material for: Processes Underlying the Nutritional Programming of Embryonic Development by Iron Deficiency in the Rat
Source: PLoS One. 2012 Oct 26;7(10):e48133. doi: 10.1371/journal.pone.0048133 (PMC3482177; doi:10.1371/journal.pone.0048133)
Supplement: Table S1 — Summary of genes which changed statistically significantly in expression in response to the iron deficient diet. (XLSX) [file pone.0048133.s001.xlsx]

## Sheet: Sheet1
Probe Set ID	p-value	FCAbsolute	regulation	Gene Symbol	Gene Title	Entrez Gene	Target Description	Representative Public ID	Ensembl
AFFX-r2-TagH_at	0.00578881	1.08646	down	---	---	---	---	---	---
1367452_PM_at	0.0086418	1.0533	down	Sumo2	SMT3 suppressor of mif two 3 homolog 2 (S. cerevisiae)	690244	gb:NM_133594.1 /DB_XREF=gi:19424297 /GEN=Smt3h2 /FEA=FLmRNA /CNT=51 /TID=Rn.5958.1 /TIER=FL+Stack /STK=35 /UG=Rn.5958 /DEF=Rattus norvegicus SMT3 suppressor of mif two 3 homolog 2 (yeast) (Smt3h2), mRNA. /PROD=SMT3 suppressor of mif two 3 homolog 2 (yeast) /FL=gb:NM_133594.1 gb:L79949.1	NM_133594	---
1367454_PM_at	0.00735667	1.11964	down	Copb2	coatomer protein complex, subunit beta 2 (beta prime)	60384	gb:NM_021765.1 /DB_XREF=gi:11120715 /GEN=Copb /FEA=FLmRNA /CNT=22 /TID=Rn.37178.1 /TIER=FL+Stack /STK=17 /UG=Rn.37178 /LL=60384 /DEF=Rattus norvegicus beta prime COP (Copb), mRNA. /PROD=beta prime COP /FL=gb:NM_021765.1 gb:AF002705.1	NM_021765	---
1367459_PM_at	0.0222567	1.04895	down	Arf1	ADP-ribosylation factor 1	64310	gb:BE329198 /DB_XREF=gi:9202974 /DB_XREF=hq38b08.x1 /CLONE=IMAGE:3121623 /FEA=FLmRNA /CNT=82 /TID=Rn.1391.1 /TIER=Stack /STK=9 /UG=Rn.1391 /LL=64310 /UG_GENE=Arf1 /UG_TITLE=ADP-ribosylation factor 1 /FL=gb:NM_022518.1 gb:L12380.1	BE329198	ENSRNOG00000030591
1367476_PM_at	0.0447974	1.05513	down	Srp14	signal recognition particle 14	296076	gb:AA799994 /DB_XREF=gi:2862949 /DB_XREF=EST189491 /CLONE=RHEAI04 /FEA=EST /CNT=43 /TID=Rn.1668.1 /TIER=Stack /STK=20 /UG=Rn.1668 /UG_TITLE=ESTs, Highly similar to S57500 signal recognition particle - mouse (M.musculus)	AA799994	ENSRNOG00000007512
1367495_PM_at	0.0209339	1.09381	down	RGD1560211	similar to prefoldin 4	364186	gb:AI412457 /DB_XREF=gi:4255961 /DB_XREF=EST240756 /CLONE=RBRDO40 /FEA=EST /CNT=18 /TID=Rn.7374.1 /TIER=Stack /STK=13 /UG=Rn.7374 /UG_TITLE=ESTs, Highly similar to prefoldin 4 (Homo sapiens) (H.sapiens)	AI412457	ENSRNOG00000025045
1367500_PM_at	0.000321395	1.1085	down	Shfm1	split hand/foot malformation (ectrodactyly) type 1	680532	gb:AI169461 /DB_XREF=gi:3705769 /DB_XREF=EST215314 /CLONE=RKIBS69 /FEA=EST /CNT=16 /TID=Rn.8472.1 /TIER=Stack /STK=11 /UG=Rn.8472 /UG_TITLE=ESTs, Highly similar to DSS1_HUMAN DELETED IN SPLIT HANDSPLIT FOOT PROTEIN 1 (M.musculus)	AI169461	---
1367503_PM_at	0.00556958	1.07547	down	Bcap31	B-cell receptor-associated protein 31	293852	gb:AI409930 /DB_XREF=gi:4253434 /DB_XREF=EST238223 /CLONE=RPLDN79 /FEA=EST /CNT=15 /TID=Rn.3358.1 /TIER=Stack /STK=11 /UG=Rn.3358 /UG_TITLE=ESTs, Highly similar to S71116 BCR-associated protein BAP31 - mouse (M.musculus)	AI409930	ENSRNOG00000019053
1367536_PM_at	0.041532	1.10162	down	Apip	APAF1 interacting protein	295961	gb:AI172106 /DB_XREF=gi:3712146 /DB_XREF=EST218101 /CLONE=RMUBV02 /FEA=EST /CNT=6 /TID=Rn.15452.1 /TIER=ConsEnd /STK=5 /UG=Rn.15452 /UG_TITLE=ESTs, Weakly similar to ZC373.5.p (Caenorhabditis elegans) (C.elegans)	AI172106	ENSRNOG00000007446
1367551_PM_a_at	0.000883776	1.10579	down	RGD1306410	similar to CG14980-PB	360768	gb:AI406693 /DB_XREF=gi:4250197 /DB_XREF=EST234980 /CLONE=ROVDV60 /FEA=EST /CNT=3 /TID=Rn.19273.1 /TIER=ConsEnd /STK=3 /UG=Rn.19273 /UG_TITLE=ESTs, Highly similar to T08806 hypothetical protein DKFZp586I1023.1 (H.sapiens)	AI406693	ENSRNOG00000001032
1367553_PM_x_at	0.0283514	1.39531	down	Hbb	hemoglobin, beta	24440	gb:NM_033234.1 /DB_XREF=gi:17985948 /GEN=Hbb /FEA=FLmRNA /CNT=369 /TID=Rn.36966.1 /TIER=FL+Stack /STK=329 /UG=Rn.36966 /LL=24440 /DEF=Rattus norvegicus Hemoglobin, beta (Hbb), mRNA. /PROD=hemoglobin, beta /FL=gb:M17084.1 gb:NM_033234.1	NM_033234	ENSRNOG00000033465
1367574_PM_at	0.000487529	1.05322	up	Vim	vimentin	81818	gb:NM_031140.1 /DB_XREF=gi:14389298 /GEN=Vim /FEA=FLmRNA /CNT=100 /TID=Rn.2710.1 /TIER=FL+Stack /STK=67 /UG=Rn.2710 /LL=81818 /DEF=Rattus norvegicus vimentin (Vim), mRNA. /PROD=vimentin /FL=gb:NM_031140.1	NM_031140	ENSRNOG00000018087
1367581_PM_a_at	0.0234924	1.34588	down	Spp1	secreted phosphoprotein 1	25353	gb:AB001382.1 /DB_XREF=gi:1871123 /FEA=FLmRNA /CNT=1 /TID=Rn.8871.3 /TIER=FL /STK=1 /UG=Rn.8871 /LL=25353 /UG_GENE=Spp1 /DEF=Rattus norvegicus mRNA for osteopontin, complete cds. /PROD=osteopontin /FL=gb:AB001382.1	AB001382	---
1367582_PM_at	0.0482213	1.04235	down	Rpl29	ribosomal protein L29	29283	gb:NM_017150.1 /DB_XREF=gi:8394208 /GEN=Rpl29 /FEA=FLmRNA /CNT=72 /TID=Rn.3973.1 /TIER=FL+Stack /STK=53 /UG=Rn.3973 /LL=29283 /DEF=Rattus norvegicus ribosomal protein L29 (Rpl29), mRNA. /PROD=ribosomal protein L29 /FL=gb:NM_017150.1	NM_017150	ENSRNOG00000011138 /// ENSRNOG00000029594
1367587_PM_at	0.0248225	1.095	up	Prl3d4	prolactin family 3, subfamily d, member 4	24282	gb:NM_033233.1 /DB_XREF=gi:15100176 /GEN=Csh1v /FEA=FLmRNA /CNT=57 /TID=Rn.1259.1 /TIER=FL+Stack /STK=50 /UG=Rn.1259 /LL=24282 /DEF=Rattus norvegicus Chorionic somatomammotropin hormone 1 variant; Placental lactogen-1 (Csh1v), mRNA. /PROD=chorionic somatomammotropin hormone 1 variant;Placental lactogen-1 /FL=gb:U32679.1 gb:NM_033233.1	NM_033233	ENSRNOG00000016792
1367613_PM_at	0.000686405	1.08316	down	Prdx1	peroxiredoxin 1	117254	gb:NM_057114.1 /DB_XREF=gi:16923957 /GEN=Prdx1 /FEA=FLmRNA /CNT=66 /TID=Rn.2845.1 /TIER=FL+Stack /STK=38 /UG=Rn.2845 /LL=117254 /DEF=Rattus norvegicus peroxiredoxin 1 (Prdx1), mRNA. /PROD=peroxiredoxin 1 /FL=gb:D30035.1 gb:NM_057114.1	NM_057114	ENSRNOG00000017194
1367614_PM_at	0.0268501	1.1286	down	Anxa1	annexin A1	25380	gb:NM_012904.1 /DB_XREF=gi:6978500 /GEN=Anxa1 /FEA=FLmRNA /CNT=58 /TID=Rn.1792.1 /TIER=FL+Stack /STK=38 /UG=Rn.1792 /LL=25380 /DEF=Rattus norvegicus Annexin 1 (p35) (Lipocortin 1) (Anxa1), mRNA. /PROD=annexin 1 (p35) (Lipocortin 1) /FL=gb:M19967.1 gb:NM_012904.1	NM_012904	ENSRNOG00000017469
1367642_PM_at	0.032501	1.11621	down	Suclg1	succinate-CoA ligase, alpha subunit	114597	gb:NM_053752.1 /DB_XREF=gi:16758585 /GEN=Suclg1 /FEA=FLmRNA /CNT=49 /TID=Rn.3766.1 /TIER=FL+Stack /STK=31 /UG=Rn.3766 /LL=114597 /DEF=Rattus norvegicus succinate-CoA ligase, GDP-forming, alpha subunit (Suclg1), mRNA. /PROD=succinate-CoA ligase, GDP-forming, alphasubunit /FL=gb:NM_053752.1 gb:J03621.1	NM_053752	ENSRNOG00000005587
1367644_PM_at	0.00408691	1.16475	up	Adcy6	adenylate cyclase 6	25289	gb:L01115.1 /DB_XREF=gi:202712 /FEA=FLmRNA /CNT=39 /TID=Rn.3313.1 /TIER=FL+Stack /STK=31 /UG=Rn.3313 /LL=25289 /UG_GENE=Adcy6 /DEF=Rattus norvegicus adenylyl cyclase type VI mRNA, complete cds. /PROD=adenylyl cyclase type VI /FL=gb:M96160.1 gb:L01115.1 gb:NM_012821.1	L01115	ENSRNOG00000011587
1367661_PM_at	0.00766959	1.44472	down	S100a6	S100 calcium binding protein A6	85247	gb:AF140232.1 /DB_XREF=gi:13506724 /GEN=S100A6 /FEA=FLmRNA /CNT=35 /TID=Rn.3233.1 /TIER=FL+Stack /STK=27 /UG=Rn.3233 /LL=85247 /DEF=Rattus norvegicus calcium binding protein (S100A6) mRNA, complete cds. /PROD=calcium binding protein /FL=gb:NM_053485.1 gb:AF140232.1	AF140232	ENSRNOG00000011647
1367671_PM_at	0.00128745	1.05311	down	Pcna	proliferating cell nuclear antigen	25737	gb:NM_022381.1 /DB_XREF=gi:11693141 /GEN=Pcna /FEA=FLmRNA /CNT=45 /TID=Rn.223.1 /TIER=FL+Stack /STK=25 /UG=Rn.223 /LL=25737 /DEF=Rattus norvegicus Proliferating cell nuclear antigen (Pcna), mRNA. /PROD=proliferating cell nuclear antigen /FL=gb:NM_022381.1	NM_022381	ENSRNOG00000021264
1367673_PM_at	0.0347561	1.28711	down	Selenbp1	selenium binding protein 1	140927	gb:NM_080892.1 /DB_XREF=gi:18266691 /GEN=Selenbp2 /FEA=FLmRNA /CNT=30 /TID=Rn.16617.1 /TIER=FL+Stack /STK=25 /UG=Rn.16617 /DEF=Rattus norvegicus selenium binding protein 2 (Selenbp2), mRNA. /PROD=selenium binding protein 2 /FL=gb:NM_080892.1 gb:AB036799.1	NM_080892	ENSRNOG00000020992
1367693_PM_at	0.0098304	1.05803	up	Ywhah	tyrosine 3-monooxygenase/tryptophan 5-monooxygenase activation protein, eta polypeptide	25576	gb:NM_013052.1 /DB_XREF=gi:6981709 /GEN=Ywhah /FEA=FLmRNA /CNT=41 /TID=Rn.3324.1 /TIER=FL+Stack /STK=22 /UG=Rn.3324 /LL=25576 /DEF=Rattus norvegicus Tyrosine 3-monooxygenasetryptophan 5-monooxygenase activation protein, eta polypeptide (Ywhah), mRNA. /PROD=tyrosine 3-monooxygenasetryptophan5-monooxygenase activation protein, eta polypeptide /FL=gb:NM_013052.1 gb:D17445.1	NM_013052	ENSRNOG00000026119
1367721_PM_at	0.0244668	1.18107	down	Sdc4	syndecan 4	24771	gb:NM_012649.1 /DB_XREF=gi:6981521 /GEN=Sdc4 /FEA=FLmRNA /CNT=24 /TID=Rn.2029.1 /TIER=FL+Stack /STK=20 /UG=Rn.2029 /LL=24771 /DEF=Rattus norvegicus Ryudocansyndecan 4 (Sdc4), mRNA. /PROD=ryudocansyndecan 4 /FL=gb:NM_012649.1 gb:M81786.1	NM_012649	---
1367757_PM_at	0.00346732	1.08488	down	Cox6c	cytochrome c oxidase, subunit VIc	54322	gb:NM_019360.1 /DB_XREF=gi:9506508 /GEN=Cox6c /FEA=FLmRNA /CNT=31 /TID=Rn.846.1 /TIER=FL+Stack /STK=18 /UG=Rn.846 /LL=54322 /DEF=Rattus norvegicus cytochrome oxidase subunit VIc (Cox6c), mRNA. /PROD=cytochrome oxidase subunit VIc /FL=gb:M27466.1 gb:NM_019360.1 gb:M27467.1	NM_019360	ENSRNOG00000010807
1367768_PM_at	0.0318063	1.09584	down	Lxn	latexin	59073	gb:NM_031655.1 /DB_XREF=gi:14269567 /GEN=Lxn /FEA=FLmRNA /CNT=28 /TID=Rn.11404.1 /TIER=FL+Stack /STK=18 /UG=Rn.11404 /LL=59073 /DEF=Rattus norvegicus latexin (Lxn), mRNA. /PROD=latexin /FL=gb:NM_031655.1 gb:U40260.1	NM_031655	ENSRNOG00000013572
1367769_PM_at	0.0437867	1.07124	down	Polr2g	polymerase (RNA) II (DNA directed) polypeptide G	117017	gb:NM_053948.1 /DB_XREF=gi:16758825 /GEN=Polr2g /FEA=FLmRNA /CNT=26 /TID=Rn.3020.1 /TIER=FL+Stack /STK=18 /UG=Rn.3020 /LL=117017 /DEF=Rattus norvegicus polymerase (RNA) II (DNA directed)polypeptide G (Polr2g), mRNA. /PROD=polymerase (RNA) II (DNA directed)polypeptide G /FL=gb:NM_053948.1	NM_053948	ENSRNOG00000019439
1367772_PM_at	0.0174119	1.08711	down	Clns1a	chloride channel, nucleotide-sensitive, 1A	65160	gb:NM_031719.1 /DB_XREF=gi:13929007 /GEN=Clns1a /FEA=FLmRNA /CNT=25 /TID=Rn.4089.1 /TIER=FL+Stack /STK=18 /UG=Rn.4089 /LL=65160 /DEF=Rattus norvegicus chloride channel, nucleotide-sensitive, 1A (Clns1a), mRNA. /PROD=chloride channel, nucleotide-sensitive, 1A /FL=gb:D13985.1 gb:NM_031719.1 gb:L26450.1	NM_031719	ENSRNOG00000012788
1367776_PM_at	0.0300077	1.0677	down	Cdc2	cell division cycle 2, G1 to S and G2 to M	54237	gb:NM_019296.1 /DB_XREF=gi:9506474 /GEN=Cdc2a /FEA=FLmRNA /CNT=26 /TID=Rn.6934.1 /TIER=FL+Stack /STK=18 /UG=Rn.6934 /LL=54237 /DEF=Rattus norvegicus Cell division cycle control protein 2 (Cdc2a), mRNA. /PROD=Cell division cycle control protein 2 /FL=gb:NM_019296.1	NM_019296	ENSRNOG00000000632
1367777_PM_at	0.0236342	1.10289	down	Decr1	2,4-dienoyl CoA reductase 1, mitochondrial	117543	gb:NM_057197.1 /DB_XREF=gi:17105349 /GEN=Decr1 /FEA=FLmRNA /CNT=24 /TID=Rn.2854.1 /TIER=FL+Stack /STK=18 /UG=Rn.2854 /LL=117543 /DEF=Rattus norvegicus 2,4-dienoyl CoA reductase 1, mitochondrial (Decr1), mRNA. /PROD=2,4-dienoyl CoA reductase 1, mitochondrial /FL=gb:D00569.1 gb:NM_057197.1	NM_057197	ENSRNOG00000008236
1367779_PM_at	0.03504	1.08738	up	Bin1	bridging integrator 1	117028	gb:NM_053959.1 /DB_XREF=gi:16758845 /GEN=Bin1 /FEA=FLmRNA /CNT=23 /TID=Rn.17098.1 /TIER=FL+Stack /STK=18 /UG=Rn.17098 /LL=117028 /DEF=Rattus norvegicus myc box dependent interacting protein 1 (Bin1), mRNA. /PROD=myc box dependent interacting protein 1 /FL=gb:NM_053959.1	NM_053959	ENSRNOG00000012852
1367780_PM_at	0.0403544	1.07122	down	Pttg1	pituitary tumor-transforming 1	64193	gb:NM_022391.1 /DB_XREF=gi:11761540 /GEN=Pttg1 /FEA=FLmRNA /CNT=21 /TID=Rn.271.1 /TIER=FL+Stack /STK=18 /UG=Rn.271 /LL=64193 /DEF=Rattus norvegicus Pituitary tumor transforming gene (Pttg1), mRNA. /PROD=pituitary tumor-transforming 1 /FL=gb:U73030.1 gb:NM_022391.1	NM_022391	ENSRNOG00000003802
1367787_PM_at	0.0163733	1.11334	down	Ica1	islet cell autoantigen 1	81024	gb:NM_030844.1 /DB_XREF=gi:13540649 /GEN=Ica1 /FEA=FLmRNA /CNT=22 /TID=Rn.1379.1 /TIER=FL+Stack /STK=18 /UG=Rn.1379 /LL=81024 /DEF=Rattus norvegicus islet cell autoantigen 1, 69 kDa (Ica1), mRNA. /PROD=islet cell autoantigen 1, 69 kDa /FL=gb:NM_030844.1 gb:L20900.1	NM_030844	ENSRNOG00000008628
1367803_PM_at	0.0255764	1.07033	down	Nup54	nucleoporin 54	53372	gb:NM_017361.1 /DB_XREF=gi:8393854 /GEN=Nup54 /FEA=FLmRNA /CNT=20 /TID=Rn.11160.1 /TIER=FL+Stack /STK=17 /UG=Rn.11160 /LL=53372 /DEF=Rattus norvegicus nucleoporin p54 (Nup54), mRNA. /PROD=nucleoporin p54 /FL=gb:NM_017361.1 gb:U63840.1	NM_017361	ENSRNOG00000002247
1367808_PM_at	0.0146372	1.10274	down	Timm8b	translocase of inner mitochondrial membrane 8 homolog b (yeast)	64372	gb:NM_022541.1 /DB_XREF=gi:11968133 /GEN=Ddp2 /FEA=FLmRNA /CNT=20 /TID=Rn.2017.1 /TIER=FL+Stack /STK=17 /UG=Rn.2017 /LL=64372 /DEF=Rattus norvegicus small zinc finger-like protein DDP2 (Ddp2), mRNA. /PROD=small zinc finger-like protein DDP2 /FL=gb:AF196315.1 gb:NM_022541.1	NM_022541	ENSRNOG00000009888
1367814_PM_at	0.0275253	1.17576	up	Atp1b1	ATPase, Na+/K+ transporting, beta 1 polypeptide	25650	gb:M14137.1 /DB_XREF=gi:203040 /FEA=FLmRNA /CNT=77 /TID=Rn.8925.1 /TIER=FL+Stack /STK=16 /UG=Rn.8925 /LL=25650 /UG_GENE=Atp1b1 /UG_TITLE=ATPase Na+K+ transporting beta 1 polypeptide /DEF=Rat brain Na- ,K- ATPase beta subunit protein mRNA, complete cds. /FL=gb:M14137.1 gb:NM_013113.1 gb:J02701.1	M14137	ENSRNOG00000002934
1367816_PM_at	0.018033	1.26402	down	Hopx	HOP homeobox	171160	gb:NM_133621.1 /DB_XREF=gi:19424343 /GEN=GIIg15b /FEA=FLmRNA /CNT=30 /TID=Rn.2989.1 /TIER=FL+Stack /STK=16 /UG=Rn.2989 /DEF=Rattus norvegicus global ischemia induced protein GIIG15B (GIIg15b), mRNA. /PROD=global ischemia induced protein GIIG15B /FL=gb:AF474162.1 gb:NM_133621.1	NM_133621	ENSRNOG00000024689
1367823_PM_at	0.00806759	1.25206	up	Timp2	TIMP metallopeptidase inhibitor 2	29543	gb:BF523128 /DB_XREF=gi:11631095 /DB_XREF=UI-R-C3-sj-h-04-0-UI.r1 /CLONE=UI-R-C3-sj-h-04-0-UI /FEA=FLmRNA /CNT=27 /TID=Rn.10161.1 /TIER=ConsEnd /STK=0 /UG=Rn.10161 /LL=29543 /UG_GENE=Timp2 /UG_TITLE=tissue inhibitor of metalloproteinase 2 /FL=gb:L31884.1 gb:U14526.1 gb:NM_021989.1	BF523128	---
1367860_PM_a_at	0.0377648	1.19829	up	Mmp14	matrix metallopeptidase 14 (membrane-inserted)	81707	gb:X83537.1 /DB_XREF=gi:805012 /GEN=rat 29 /FEA=mRNA /CNT=1 /TID=Rn.10371.2 /TIER=ConsEnd /STK=0 /UG=Rn.10371 /LL=81707 /DEF=Rattus norvegicus mRNA for membrane-type matrix metalloproteinase. /PROD=MT-MMP	X83537	ENSRNOG00000010947
1367870_PM_at	0.00158568	1.08035	down	Glrx3	glutaredoxin 3	58815	gb:NM_032614.1 /DB_XREF=gi:14249133 /GEN=Txnl2 /FEA=FLmRNA /CNT=24 /TID=Rn.3578.1 /TIER=FL+Stack /STK=14 /UG=Rn.3578 /LL=58815 /DEF=Rattus norvegicus thioredoxin-like 2 (Txnl2), mRNA. /PROD=thioredoxin-like 2 /FL=gb:AF118651.1 gb:NM_032614.1	NM_032614	ENSRNOG00000016227
1367877_PM_at	0.0210771	1.11324	down	Slc11a2	solute carrier family 11 (proton-coupled divalent metal ion transporters), member 2	25715	gb:NM_013173.1 /DB_XREF=gi:6981287 /GEN=Slc11a2 /FEA=FLmRNA /CNT=22 /TID=Rn.11418.1 /TIER=FL+Stack /STK=14 /UG=Rn.11418 /LL=25715 /DEF=Rattus norvegicus Solute carrier family 11 member 2 (natural resistance-associated macrophage protein 2) (Slc11a2), mRNA. /PROD=natural resistance-associated macrophage protein2 /FL=gb:NM_013173.1 gb:AF008439.1	NM_013173	ENSRNOG00000019550
1367898_PM_at	0.0440182	1.06892	up	Bnip3l	BCL2/adenovirus E1B interacting protein 3-like	140923	gb:AF441118.1 /DB_XREF=gi:16974770 /GEN=Bnip3l /FEA=FLmRNA /CNT=39 /TID=Rn.827.1 /TIER=FL+Stack /STK=8 /UG=Rn.827 /DEF=Rattus norvegicus BNIP3L protein (Bnip3l) mRNA, complete cds. /PROD=BNIP3L protein /FL=gb:AB077364.1 gb:NM_080888.1 gb:AF441118.1	AF441118	ENSRNOG00000009820
1367905_PM_at	0.0480504	1.09022	down	Enpp3	ectonucleotide pyrophosphatase/phosphodiesterase 3	54410	gb:NM_019370.1 /DB_XREF=gi:9506848 /GEN=LOC54410 /FEA=FLmRNA /CNT=20 /TID=Rn.44.1 /TIER=FL+Stack /STK=13 /UG=Rn.44 /LL=54410 /DEF=Rattus norvegicus alkaline phosphodiesterase (LOC54410), mRNA. /PROD=alkaline phosphodiesterase /FL=gb:D30649.1 gb:U78788.1 gb:U78787.1 gb:NM_019370.1	NM_019370	ENSRNOG00000013791
1367928_PM_at	0.0255646	1.27034	up	Myh7	myosin, heavy chain 7, cardiac muscle, beta	29557	gb:BF395647 /DB_XREF=gi:11380617 /DB_XREF=UI-R-CM0-bjp-e-07-0-UI.s1 /CLONE=UI-R-CM0-bjp-e-07-0-UI /FEA=FLmRNA /CNT=62 /TID=Rn.48663.1 /TIER=Stack /STK=13 /UG=Rn.48663 /LL=29557 /UG_GENE=Myh7 /UG_TITLE=myosin heavy chain, cardiac muscle, fetal /FL=gb:NM_017240.1	BF395647	ENSRNOG00000016983
1367930_PM_at	0.00656156	1.18305	up	Gap43	growth associated protein 43	29423	gb:NM_017195.1 /DB_XREF=gi:8393414 /GEN=Basp2 /FEA=FLmRNA /CNT=33 /TID=Rn.10928.1 /TIER=FL+Stack /STK=12 /UG=Rn.10928 /LL=29423 /DEF=Rattus norvegicus brain abundant, membrane attached signal protein 2 (Basp2), mRNA. /PROD=brain abundant, membrane attached signal protein2 /FL=gb:NM_017195.1 gb:M16736.1 gb:M16228.1	NM_017195	---
1367932_PM_at	0.0162598	1.07213	up	Hmgcs1	3-hydroxy-3-methylglutaryl-Coenzyme A synthase 1 (soluble)	29637	gb:NM_017268.1 /DB_XREF=gi:8393537 /GEN=Hmgcs1 /FEA=FLmRNA /CNT=39 /TID=Rn.5106.1 /TIER=FL+Stack /STK=12 /UG=Rn.5106 /LL=29637 /DEF=Rattus norvegicus 3-hydroxy-3-methylglutaryl-Coenzyme A synthase 1 (Hmgcs1), mRNA. /PROD=3-hydroxy-3-methylglutaryl-Coenzyme A synthase1 /FL=gb:NM_017268.1	NM_017268	ENSRNOG00000016552
1367959_PM_a_at	0.0341434	1.10924	up	Scn1b	sodium channel, voltage-gated, type I, beta	29686	gb:AF182949.1 /DB_XREF=gi:6694220 /GEN=SCN1B /FEA=FLmRNA /CNT=1 /TID=Rn.4958.2 /TIER=FL /STK=1 /UG=Rn.4958 /LL=29686 /DEF=Rattus norvegicus voltage-gated sodium channel subunit beta1-A (SCN1B) mRNA, alternatively spliced, complete cds. /PROD=voltage-gated sodium channel subunit beta1-A /FL=gb:AF182949.1	AF182949	ENSRNOG00000021102
1367974_PM_at	0.0496308	1.09656	down	Anxa3	annexin A3	25291	gb:NM_012823.1 /DB_XREF=gi:6978502 /GEN=Anx3 /FEA=FLmRNA /CNT=24 /TID=Rn.6589.1 /TIER=FL+Stack /STK=11 /UG=Rn.6589 /LL=25291 /DEF=Rattus norvegicus Annexin A3 (Anx3), mRNA. /PROD=Annexin A3 /FL=gb:NM_012823.1 gb:M20559.1	NM_012823	ENSRNOG00000002045
1368022_PM_at	0.00280934	1.09304	up	Inppl1	inositol polyphosphate phosphatase-like 1	65038	gb:NM_022944.1 /DB_XREF=gi:12621111 /GEN=Inppl1 /FEA=FLmRNA /CNT=12 /TID=Rn.42902.1 /TIER=FL+Stack /STK=11 /UG=Rn.42902 /LL=65038 /DEF=Rattus norvegicus SH2-containing inositol phosphatase 2 (Inppl1), mRNA. /PROD=SH2-containing inositol phosphatase 2 /FL=gb:NM_022944.1 gb:AB025794.1	NM_022944	---
1368053_PM_at	0.0282846	1.12735	up	Pard3	par-3 (partitioning defective 3) homolog (C. elegans)	81918	gb:NM_031235.1 /DB_XREF=gi:13676838 /GEN=Par3 /FEA=FLmRNA /CNT=26 /TID=Rn.31803.1 /TIER=FL+Stack /STK=10 /UG=Rn.31803 /LL=81918 /DEF=Rattus norvegicus three-PDZ containing protein similar to C. elegans PAR3 (partitioning defect) (Par3), mRNA. /PROD=three-PDZ containing protein similar to C.elegans PAR3 (partitioning defect) /FL=gb:NM_031235.1 gb:AB005549.1	NM_031235	---
1368060_PM_at	0.000172793	1.21981	down	Hrsp12	heat-responsive protein 12	65151	gb:NM_031714.1 /DB_XREF=gi:14269571 /GEN=Hrsp12 /FEA=FLmRNA /CNT=14 /TID=Rn.6987.1 /TIER=FL+Stack /STK=10 /UG=Rn.6987 /LL=65151 /DEF=Rattus norvegicus heat-responsive protein 12 (Hrsp12), mRNA. /PROD=heat-responsive protein 12 /FL=gb:NM_031714.1 gb:AF015949.1	NM_031714	ENSRNOG00000005437
1368064_PM_a_at	0.000714413	1.18988	down	Ddc	dopa decarboxylase (aromatic L-amino acid decarboxylase)	24311	gb:U31884.1 /DB_XREF=gi:975308 /FEA=FLmRNA /CNT=1 /TID=Rn.11064.2 /TIER=FL /STK=1 /UG=Rn.11064 /LL=24311 /UG_GENE=Ddc /DEF=Rattus norvegicus aromatic L-amino acid decarboxylase mRNA, complete cds, alternatively spliced 3 end. /PROD=aromatic L-amino acid decarboxylase /FL=gb:U31884.1	U31884	ENSRNOG00000004327
1368067_PM_at	0.00268788	1.12306	up	Zfp148	zinc finger protein 148	58820	gb:NM_031615.1 /DB_XREF=gi:13928841 /GEN=Znf148 /FEA=FLmRNA /CNT=14 /TID=Rn.64671.1 /TIER=FL+Stack /STK=10 /UG=Rn.64671 /LL=58820 /DEF=Rattus norvegicus zinc finger protein 148 (Znf148), mRNA. /PROD=zinc finger protein 148 /FL=gb:U30381.1 gb:NM_031615.1	NM_031615	ENSRNOG00000001789
1368072_PM_at	0.00900261	1.09705	down	Btg3	B-cell translocation gene 3	54230	gb:NM_019290.1 /DB_XREF=gi:9506428 /GEN=Btg3 /FEA=FLmRNA /CNT=13 /TID=Rn.8897.1 /TIER=FL+Stack /STK=10 /UG=Rn.8897 /LL=54230 /DEF=Rattus norvegicus B-cell translocation gene 3 (Btg3), mRNA. /PROD=B-cell translocation gene 3 /FL=gb:AF087037.1 gb:NM_019290.1	NM_019290	ENSRNOG00000001555
1368078_PM_at	0.0186142	1.14465	down	Esm1	endothelial cell-specific molecule 1	64536	gb:NM_022604.1 /DB_XREF=gi:12018273 /GEN=Pg25 /FEA=FLmRNA /CNT=13 /TID=Rn.6376.1 /TIER=FL+Stack /STK=10 /UG=Rn.6376 /LL=64536 /DEF=Rattus norvegicus pineal specific PG25 protein (Pg25), mRNA. /PROD=pineal specific PG25 protein /FL=gb:U80818.1 gb:NM_022604.1	NM_022604	ENSRNOG00000010797
1368083_PM_at	0.0221172	1.07109	down	Ccnh	cyclin H	84389	gb:NM_052981.1 /DB_XREF=gi:16418482 /GEN=Ccnh /FEA=FLmRNA /CNT=12 /TID=Rn.23255.1 /TIER=FL+Stack /STK=10 /UG=Rn.23255 /LL=84389 /DEF=Rattus norvegicus cyclin H (Ccnh), mRNA. /PROD=cyclin H /FL=gb:NM_052981.1 gb:AF154914.1	NM_052981	ENSRNOG00000031656
1368092_PM_at	0.0138592	1.27461	down	Fah	fumarylacetoacetate hydrolase	29383	gb:NM_017181.1 /DB_XREF=gi:8393348 /GEN=Fah /FEA=FLmRNA /CNT=10 /TID=Rn.9195.1 /TIER=FL+Stack /STK=10 /UG=Rn.9195 /LL=29383 /DEF=Rattus norvegicus fumarylacetoacetate hydrolase (Fah), mRNA. /PROD=fumarylacetoacetate hydrolase /FL=gb:M77694.1 gb:NM_017181.1	NM_017181	ENSRNOG00000013223
1368097_PM_a_at	0.0171388	1.13512	up	Rtn1	reticulon 1	116644	gb:NM_053865.1 /DB_XREF=gi:16758731 /GEN=Rtn1 /FEA=FLmRNA /CNT=20 /TID=Rn.55126.1 /TIER=FL+Stack /STK=9 /UG=Rn.55126 /LL=116644 /DEF=Rattus norvegicus reticulon 1 (Rtn1), mRNA. /PROD=reticulon 1 /FL=gb:U17604.1 gb:NM_053865.1	NM_053865	ENSRNOG00000004794
1368104_PM_at	0.0196135	1.14572	down	Tspan2	tetraspanin 2	64521	gb:NM_022589.1 /DB_XREF=gi:12018245 /GEN=Tspan-2 /FEA=FLmRNA /CNT=27 /TID=Rn.5872.1 /TIER=FL+Stack /STK=9 /UG=Rn.5872 /LL=64521 /DEF=Rattus norvegicus Tspan-2 protein (Tspan-2), mRNA. /PROD=Tspan-2 protein /FL=gb:NM_022589.1	NM_022589	ENSRNOG00000023338
1368105_PM_at	0.0282468	1.1358	down	Tspan2	tetraspanin 2	64521	gb:AI228231 /DB_XREF=gi:3812118 /DB_XREF=EST224926 /CLONE=RBRCS19 /FEA=FLmRNA /CNT=27 /TID=Rn.5872.1 /TIER=Stack /STK=7 /UG=Rn.5872 /LL=64521 /UG_GENE=Tspan-2 /UG_TITLE=Tspan-2 protein /FL=gb:NM_022589.1	AI228231	ENSRNOG00000023338
1368110_PM_a_at	0.0119405	1.12145	down	Syngap1	synaptic Ras GTPase activating protein 1 homolog (rat)	192117	gb:AB016962.1 /DB_XREF=gi:4417206 /GEN=synGAP-d /FEA=FLmRNA /CNT=15 /TID=Rn.9908.1 /TIER=FL /STK=1 /UG=Rn.9908 /LL=84551 /DEF=Rattus norvegicus mRNA for synGAP-d, complete cds. /PROD=synGAP-d /FL=gb:AB024400.1 gb:NM_053442.1 gb:AB016962.1	AB016962	ENSRNOG00000000483
1368113_PM_at	0.0327038	1.20723	down	Tff2	trefoil factor 2	116592	gb:NM_053844.1 /DB_XREF=gi:16758701 /GEN=Tff2 /FEA=FLmRNA /CNT=12 /TID=Rn.34367.1 /TIER=FL+Stack /STK=9 /UG=Rn.34367 /LL=116592 /DEF=Rattus norvegicus trefoil factor 2 (spasmolytic protein 1) (Tff2), mRNA. /PROD=trefoil factor 2 (spasmolytic protein 1) /FL=gb:M97255.1 gb:NM_053844.1	NM_053844	ENSRNOG00000001162
1368114_PM_at	0.00886864	1.17775	up	Fgf13	fibroblast growth factor 13	84488	gb:NM_053428.1 /DB_XREF=gi:16758167 /GEN=Fgf13 /FEA=FLmRNA /CNT=24 /TID=Rn.15709.1 /TIER=FL+Stack /STK=9 /UG=Rn.15709 /LL=84488 /DEF=Rattus norvegicus fibroblast growth factor 13 (Fgf13), mRNA. /PROD=fibroblast growth factor 13 /FL=gb:AF271786.1 gb:NM_053428.1	NM_053428	---
1368115_PM_at	0.0248479	1.2401	down	Cldn3	claudin 3	65130	gb:NM_031700.1 /DB_XREF=gi:13928977 /GEN=Cldn3 /FEA=FLmRNA /CNT=20 /TID=Rn.4513.1 /TIER=FL+Stack /STK=9 /UG=Rn.4513 /LL=65130 /DEF=Rattus norvegicus claudin 3 (Cldn3), mRNA. /PROD=claudin 3 /FL=gb:M74067.1 gb:NM_031700.1	NM_031700	---
1368137_PM_at	0.0213014	1.2833	up	Mapt	microtubule-associated protein tau	29477	gb:NM_017212.1 /DB_XREF=gi:8393751 /GEN=Mapt /FEA=FLmRNA /CNT=55 /TID=Rn.2455.1 /TIER=FL+Stack /STK=8 /UG=Rn.2455 /LL=29477 /DEF=Rattus norvegicus microtubule-associated protein tau (Mapt), mRNA. /PROD=microtubule-associated protein tau /FL=gb:NM_017212.1	NM_017212	ENSRNOG00000005133
1368138_PM_at	0.0115762	1.37329	up	Mapt	microtubule-associated protein tau	29477	gb:BI281170 /DB_XREF=gi:14930636 /DB_XREF=UI-R-CT0s-cat-b-09-0-UI.s1 /CLONE=UI-R-CT0s-cat-b-09-0-UI /FEA=FLmRNA /CNT=55 /TID=Rn.2455.1 /TIER=Stack /STK=13 /UG=Rn.2455 /LL=29477 /UG_GENE=Mapt /UG_TITLE=microtubule-associated protein tau /FL=gb:NM_017212.1	BI281170	ENSRNOG00000005133
1368143_PM_at	0.0375645	1.12008	down	Anxa7	annexin A7	155423	gb:AI013902 /DB_XREF=gi:4133939 /DB_XREF=EST208577 /CLONE=RSPBZ28 /FEA=FLmRNA /CNT=30 /TID=Rn.18916.1 /TIER=Stack /STK=13 /UG=Rn.18916 /UG_TITLE=Rattus norvegicus annexin VII mRNA, complete cds /FL=gb:NM_130416.1 gb:AF280423.1	AI013902	ENSRNOG00000007136
1368181_PM_at	0.00699685	1.10882	down	Mthfd1	methylenetetrahydrofolate dehydrogenase (NADP+ dependent) 1, methenyltetrahydrofolate cyclohydrolase, formyltetrahydrofolate synthetase	64300	gb:NM_022508.1 /DB_XREF=gi:11968081 /GEN=LOC64300 /FEA=FLmRNA /CNT=10 /TID=Rn.1114.1 /TIER=FL+Stack /STK=8 /UG=Rn.1114 /LL=64300 /DEF=Rattus norvegicus C1-tetrahydrofolate synthase (LOC64300), mRNA. /PROD=C1-tetrahydrofolate synthase /FL=gb:NM_022508.1 gb:J05519.1	NM_022508	ENSRNOG00000005602
1368208_PM_at	0.0286734	1.13974	down	Nat8b	N-acetyltransferase 8B	171084	gb:NM_133558.1 /DB_XREF=gi:19424237 /GEN=Cml1 /FEA=FLmRNA /CNT=9 /TID=Rn.3643.1 /TIER=FL+Stack /STK=8 /UG=Rn.3643 /DEF=Rattus norvegicus camello-like 1 (Cml1), mRNA. /PROD=camello-like 1 /FL=gb:AF163318.1 gb:NM_133558.1	NM_133558	ENSRNOG00000015851
1368220_PM_at	0.00422105	1.12331	down	Gtf2b	general transcription factor IIB	81673	gb:NM_031041.1 /DB_XREF=gi:13591964 /GEN=Gtf2b /FEA=FLmRNA /CNT=15 /TID=Rn.6109.1 /TIER=FL+Stack /STK=7 /UG=Rn.6109 /LL=81673 /DEF=Rattus norvegicus general transcription factor IIB (Gtf2b), mRNA. /PROD=general transcription factor IIB /FL=gb:NM_031041.1	NM_031041	ENSRNOG00000011135
1368222_PM_at	0.0107541	1.09553	up	Nr3c1	nuclear receptor subfamily 3, group C, member 1	24413	gb:AY066016.2 /DB_XREF=gi:19343484 /FEA=FLmRNA /CNT=34 /TID=Rn.29814.1 /TIER=FL /STK=2 /UG=Rn.29814 /LL=24413 /UG_GENE=Nr3c1 /DEF=Rattus norvegicus strain BNCrl glucocorticoid receptor mRNA, complete cds. /PROD=glucocorticoid receptor /FL=gb:M14053.1 gb:AF455050.1 gb:NM_012576.1 gb:AY066016.2	AY066016	ENSRNOG00000014096
1368244_PM_at	0.000765849	1.30819	down	As3mt	arsenic (+3 oxidation state) methyltransferase	140925	gb:NM_080890.1 /DB_XREF=gi:18376836 /GEN=Cyt19 /FEA=FLmRNA /CNT=9 /TID=Rn.41876.1 /TIER=FL+Stack /STK=7 /UG=Rn.41876 /DEF=Rattus norvegicus methyltransferase Cyt19 (Cyt19), mRNA. /PROD=methyltransferase Cyt19 /FL=gb:AF393243.1 gb:NM_080890.1	NM_080890	---
1368255_PM_at	0.0271362	1.22606	up	Ntm	neurotrimin	50864	gb:NM_017354.1 /DB_XREF=gi:8394195 /GEN=RNU16845 /FEA=FLmRNA /CNT=8 /TID=Rn.10075.1 /TIER=FL+Stack /STK=7 /UG=Rn.10075 /LL=50864 /DEF=Rattus norvegicus neurotrimin (RNU16845), mRNA. /PROD=neurotrimin /FL=gb:NM_017354.1 gb:U16845.1	NM_017354	---
1368263_PM_a_at	0.0233262	1.13607	down	Mobp	myelin-associated oligodendrocyte basic protein	25037	gb:X90402.1 /DB_XREF=gi:1177331 /GEN=MOBP-69 /FEA=mRNA /CNT=1 /TID=Rn.7619.7 /TIER=ConsEnd /STK=0 /UG=Rn.7619 /LL=25037 /DEF=R.norvegicus mRNA for Myelin-associatedOligodendrocytic Basic Protein-69. /PROD=Myelin-associatedOligodendrocytic BasicProtein	X90402	---
1368266_PM_at	0.0112634	1.32568	down	Arg1	arginase, liver	29221	gb:NM_017134.1 /DB_XREF=gi:8392919 /GEN=Arg1 /FEA=FLmRNA /CNT=8 /TID=Rn.9857.1 /TIER=FL+Stack /STK=7 /UG=Rn.9857 /LL=29221 /DEF=Rattus norvegicus arginase 1, liver (Arg1), mRNA. /PROD=arginase 1, liver /FL=gb:J02720.1 gb:NM_017134.1	NM_017134	ENSRNOG00000013304
1368268_PM_at	0.0242462	1.12503	down	Tdg	thymine-DNA glycosylase	114521	gb:NM_053729.1 /DB_XREF=gi:16758543 /GEN=Tdg /FEA=FLmRNA /CNT=7 /TID=Rn.12304.1 /TIER=FL+Stack /STK=7 /UG=Rn.12304 /LL=114521 /DEF=Rattus norvegicus thymine-DNA glycosylase (Tdg), mRNA. /PROD=thymine-DNA glycosylase /FL=gb:NM_053729.1 gb:AY026945.1	NM_053729	ENSRNOG00000027124
1368270_PM_at	0.0452705	1.12622	up	Apobec1	apolipoprotein B mRNA editing enzyme, catalytic polypeptide 1	25383	gb:NM_012907.1 /DB_XREF=gi:6978518 /GEN=Apobec1 /FEA=FLmRNA /CNT=7 /TID=Rn.10002.1 /TIER=FL+Stack /STK=7 /UG=Rn.10002 /LL=25383 /DEF=Rattus norvegicus Apolipoprotein B editing protein (Apobec1), mRNA. /PROD=apolipoprotein B editing protein /FL=gb:L07114.1 gb:NM_012907.1	NM_012907	ENSRNOG00000015411
1368306_PM_at	0.0389804	1.14317	down	Grin2c	glutamate receptor, ionotropic, N-methyl D-aspartate 2C	24411	gb:U08259.1 /DB_XREF=gi:475549 /FEA=FLmRNA /CNT=10 /TID=Rn.9709.1 /TIER=FL+Stack /STK=6 /UG=Rn.9709 /LL=24411 /UG_GENE=Grin2c /DEF=Rattus norvegicus Sprague-Dawley N-methyl-D-aspartate receptor NMDAR2C subunit mRNA, complete cds. /PROD=N-methyl-D-aspartate receptor NMDAR2C subunit /FL=gb:M91563.1 gb:U08259.1 gb:NM_012575.1	U08259	ENSRNOG00000003280
1368320_PM_at	0.0328146	1.28464	up	Ncam1	neural cell adhesion molecule 1	24586	gb:NM_031521.1 /DB_XREF=gi:13928705 /GEN=Ncam1 /FEA=FLmRNA /CNT=11 /TID=Rn.11283.1 /TIER=FL+Stack /STK=6 /UG=Rn.11283 /LL=24586 /DEF=Rattus norvegicus Cell adhesion molecule, neural (CD56) (Ncam1), mRNA. /PROD=neural cell adhesion molecule /FL=gb:NM_031521.1	NM_031521	ENSRNOG00000031890
1368356_PM_a_at	9.27269e-05	1.25813	down	Erap1	endoplasmic reticulum aminopeptidase 1	80897	gb:NM_030836.1 /DB_XREF=gi:13540637 /GEN=APPILS /FEA=FLmRNA /CNT=7 /TID=Rn.22516.1 /TIER=FL+Stack /STK=6 /UG=Rn.22516 /LL=80897 /DEF=Rattus norvegicus leucyl-specific aminopeptidase PILS (APPILS), mRNA. /PROD=leucyl-specific aminopeptidase PILS /FL=gb:AF148324.1 gb:NM_030836.1	NM_030836	ENSRNOG00000009997
1368361_PM_a_at	0.007664	1.11592	down	Ptpn2	protein tyrosine phosphatase, non-receptor type 2	117063	gb:NM_053990.1 /DB_XREF=gi:16758895 /GEN=Ptpn2 /FEA=FLmRNA /CNT=7 /TID=Rn.33497.1 /TIER=FL+Stack /STK=6 /UG=Rn.33497 /LL=117063 /DEF=Rattus norvegicus protein tyrosine phosphatase, non-receptor type 2 (Ptpn2), mRNA. /PROD=protein tyrosine phosphatase, non-receptor type2 /FL=gb:NM_053990.1	NM_053990	---
1368363_PM_at	0.0382113	1.30112	up	Klf5	Kruppel-like factor 5	84410	gb:NM_053394.1 /DB_XREF=gi:16758121 /GEN=Klf5 /FEA=FLmRNA /CNT=7 /TID=Rn.17478.1 /TIER=FL+Stack /STK=6 /UG=Rn.17478 /LL=84410 /DEF=Rattus norvegicus Kruppel-like factor 5 (intestinal) (Klf5), mRNA. /PROD=Kruppel-like factor 5 (intestinal) /FL=gb:NM_053394.1 gb:AF182101.1	NM_053394	ENSRNOG00000008785///ENSRNOG00000007816
1368368_PM_a_at	0.0210111	1.17815	down	Lsr	lipolysis stimulated lipoprotein receptor	64355	gb:NM_032616.1 /DB_XREF=gi:14249139 /GEN=Lisch7 /FEA=FLmRNA /CNT=8 /TID=Rn.48696.1 /TIER=FL+Stack /STK=6 /UG=Rn.48696 /LL=64355 /DEF=Rattus norvegicus liver-specific bHLH-Zip transcription factor (Lisch7), mRNA. /PROD=liver-specific bHLH-Zip transcription factor /FL=gb:AF119667.1 gb:NM_032616.1	NM_032616	ENSRNOG00000021053
1368374_PM_a_at	0.0307666	1.17464	down	Ggt1	gamma-glutamyltransferase 1	116568	gb:NM_053840.1 /DB_XREF=gi:16758695 /GEN=M33821 /FEA=FLmRNA /CNT=7 /TID=Rn.10010.1 /TIER=FL+Stack /STK=6 /UG=Rn.10010 /LL=116568 /DEF=Rattus norvegicus gamma-glutamyl transpeptidase (M33821), mRNA. /PROD=gamma-glutamyl transpeptidase /FL=gb:NM_053840.1 gb:M33821.1	NM_053840	---
1368384_PM_at	0.0308757	1.10689	down	Klk6	kallikrein related-peptidase 6	29245	gb:NM_019175.1 /DB_XREF=gi:9506996 /GEN=Klk6 /FEA=FLmRNA /CNT=7 /TID=Rn.10732.1 /TIER=FL+Stack /STK=6 /UG=Rn.10732 /LL=29245 /DEF=Rattus norvegicus kallikrein 6 (neurosin, zyme) (Klk6), mRNA. /PROD=kallikrein 6 (neurosin, zyme) /FL=gb:NM_019175.1 gb:AF016269.1	NM_019175	ENSRNOG00000031927
1368393_PM_at	0.0350841	1.12194	up	Cd93	CD93 molecule	84398	gb:NM_053383.1 /DB_XREF=gi:16758113 /GEN=Ly68 /FEA=FLmRNA /CNT=16 /TID=Rn.4129.1 /TIER=FL /STK=5 /UG=Rn.4129 /LL=84398 /DEF=Rattus norvegicus lymphocyte antigen 68 (Ly68), mRNA. /PROD=lymphocyte antigen 68 /FL=gb:AF136537.1 gb:NM_053383.1 gb:AF160978.1	NM_053383	---
1368398_PM_at	0.00903443	1.24385	up	Cacna1h	calcium channel, voltage-dependent, T type, alpha 1H subunit	114862	gb:NM_031601.1 /DB_XREF=gi:13928819 /GEN=Cacna1g /FEA=FLmRNA /CNT=22 /TID=Rn.23698.1 /TIER=FL /STK=5 /UG=Rn.23698 /LL=29717 /DEF=Rattus norvegicus calcium channel, voltage-dependent, T type, alpha 1G subunit (Cacna1g), mRNA. /PROD=calcium channel, voltage-dependent, T type,alpha 1G subunit /FL=gb:AF290213.1 gb:NM_031601.1	NM_031601	ENSRNOG00000033893
1368400_PM_at	0.00980039	1.1633	down	Timm8a1	translocase of inner mitochondrial membrane 8 homolog a1 (yeast)	84383	gb:NM_053370.1 /DB_XREF=gi:16758097 /GEN=Timm8a /FEA=FLmRNA /CNT=10 /TID=Rn.22930.1 /TIER=FL /STK=5 /UG=Rn.22930 /LL=84383 /DEF=Rattus norvegicus translocase of inner mitochondrial membrane 8 (yeast) homolog A (Timm8a), mRNA. /PROD=translocase of inner mitochondrial membrane 8(yeast) homolog A /FL=gb:AF150082.1 gb:NM_053370.1	NM_053370	---
1368411_PM_a_at	0.0134221	1.6023	up	Map2	microtubule-associated protein 2	25595	gb:X74211.1 /DB_XREF=gi:525271 /GEN=MAP2 /FEA=mRNA /CNT=1 /TID=Rn.10484.3 /TIER=ConsEnd /STK=0 /UG=Rn.10484 /LL=25595 /DEF=R.norvegicus mRNA for MAP2d protein. /PROD=MAP2d	X74211	ENSRNOG00000011841
1368438_PM_at	0.0472212	1.12348	up	Pde10a	phosphodiesterase 10A	63885	gb:NM_022236.1 /DB_XREF=gi:13489074 /GEN=Pde10a /FEA=FLmRNA /CNT=7 /TID=Rn.44869.1 /TIER=FL /STK=5 /UG=Rn.44869 /LL=63885 /DEF=Rattus norvegicus phosphodiesterase 10A (Pde10a), mRNA. /PROD=phosphodiesterase 10A /FL=gb:AB027155.1 gb:NM_022236.1	NM_022236	ENSRNOG00000011310
1368454_PM_at	0.0258707	1.08739	up	Prl7d1	prolactin family 7, subfamily d, member 1	84377	gb:NM_053364.1 /DB_XREF=gi:16758091 /GEN=Plfr /FEA=FLmRNA /CNT=8 /TID=Rn.15366.1 /TIER=FL /STK=5 /UG=Rn.15366 /LL=84377 /DEF=Rattus norvegicus proliferin-related protein (Plfr), mRNA. /PROD=proliferin-related protein /FL=gb:AF139809.1 gb:AF226609.1 gb:NM_053364.1	NM_053364	ENSRNOG00000016510
1368461_PM_at	0.0234176	1.09899	down	Slc22a8	solute carrier family 22 (organic anion transporter), member 8	83500	gb:NM_031332.1 /DB_XREF=gi:13786159 /GEN=LOC83500 /FEA=FLmRNA /CNT=7 /TID=Rn.23348.1 /TIER=FL /STK=5 /UG=Rn.23348 /LL=83500 /DEF=Rattus norvegicus organic anion transporter (LOC83500), mRNA. /PROD=organic anion transporter /FL=gb:AB017446.1 gb:NM_031332.1	NM_031332	ENSRNOG00000018086
1368507_PM_at	0.0156394	1.08864	down	Psma3 /// Psma3l	proteasome subunit alpha type 3-like"///"proteasome (prosome, macropain) subunit, alpha type 3	29670 /// 408248	gb:NM_017280.1 /DB_XREF=gi:8394065 /GEN=Psma3 /FEA=FLmRNA /CNT=40 /TID=Rn.3997.1 /TIER=FL /STK=4 /UG=Rn.3997 /LL=29670 /DEF=Rattus norvegicus proteasome (prosome, macropain) subunit, alpha type 3 (Psma3), mRNA. /PROD=proteasome (prosome, macropain) subunit, alphatype 3 /FL=gb:NM_017280.1 gb:M58593.1	NM_017280	ENSRNOG00000007851
1368517_PM_at	0.0257294	1.13479	up	Ssbp3	single stranded DNA binding protein 3	84354	gb:NM_053358.1 /DB_XREF=gi:16758085 /GEN=Ssdp /FEA=FLmRNA /CNT=15 /TID=Rn.18070.1 /TIER=FL /STK=4 /UG=Rn.18070 /LL=84354 /DEF=Rattus norvegicus sequence-specific single-stranded-DNA-binding protein (Ssdp), mRNA. /PROD=sequence-specific single-stranded-DNA-bindingprotein /FL=gb:AF121893.1 gb:NM_053358.1	NM_053358	ENSRNOG00000007920
1368522_PM_at	0.0395836	1.06615	up	Timeless	timeless homolog (Drosophila)	83508	gb:NM_031340.1 /DB_XREF=gi:13786173 /GEN=Timeless /FEA=FLmRNA /CNT=14 /TID=Rn.31755.1 /TIER=FL /STK=4 /UG=Rn.31755 /LL=83508 /DEF=Rattus norvegicus timeless (Drosophila) homolog (Timeless), mRNA. /PROD=timeless (Drosophila) homolog /FL=gb:NM_031340.1 gb:AB019576.1	NM_031340	---
1368526_PM_at	0.0079301	1.14379	down	Pex3	peroxisomal biogenesis factor 3	83519	gb:NM_031350.1 /DB_XREF=gi:13786193 /GEN=Pex3 /FEA=FLmRNA /CNT=12 /TID=Rn.11773.1 /TIER=FL /STK=4 /UG=Rn.11773 /LL=83519 /DEF=Rattus norvegicus peroxisomal biogenesis factor 3 (Pex3), mRNA. /PROD=peroxisomal biogenesis factor 3 /FL=gb:AB035306.1 gb:NM_031350.1	NM_031350	ENSRNOG00000015660
1368528_PM_at	0.00604994	1.17509	down	Cd99l2	CD99 molecule-like 2	171485	gb:NM_134459.1 /DB_XREF=gi:19745187 /GEN=Mic2l1 /FEA=FLmRNA /CNT=11 /TID=Rn.20204.1 /TIER=FL /STK=4 /UG=Rn.20204 /LL=171485 /DEF=Rattus norvegicus MIC2 like 1 (Mic2l1), mRNA. /PROD=MIC2 like 1 /FL=gb:NM_134459.1 gb:AF481858.1 gb:AB031014.1	NM_134459	ENSRNOG00000018148
1368535_PM_at	0.00647287	1.11625	up	Hrk	harakiri, BCL2 interacting protein (contains only BH3 domain)	117271	gb:NM_057130.1 /DB_XREF=gi:16923981 /GEN=Bid3 /FEA=FLmRNA /CNT=13 /TID=Rn.11344.1 /TIER=FL /STK=4 /UG=Rn.11344 /LL=117271 /DEF=Rattus norvegicus BH3 interacting (with BCL2 family) domain, apoptosis agonist (Bid3), mRNA. /PROD=BH3 interacting (with BCL2 family) domain,apoptosis agonist /FL=gb:D83697.1 gb:NM_057130.1	NM_057130	---
1368541_PM_at	0.00274801	1.1676	down	Emb	embigin	114511	gb:NM_053719.1 /DB_XREF=gi:16758533 /GEN=Emb /FEA=FLmRNA /CNT=9 /TID=Rn.16221.1 /TIER=FL /STK=4 /UG=Rn.16221 /LL=114511 /DEF=Rattus norvegicus embigin (Emb), mRNA. /PROD=embigin /FL=gb:NM_053719.1	NM_053719	ENSRNOG00000011365
1368548_PM_at	0.0350395	1.07352	down	Slc12a1	solute carrier family 12 (sodium/potassium/chloride transporters), member 1	25065	gb:NM_019134.1 /DB_XREF=gi:9507102 /GEN=Slc12a1 /FEA=FLmRNA /CNT=9 /TID=Rn.14799.1 /TIER=FL /STK=4 /UG=Rn.14799 /LL=25065 /DEF=Rattus norvegicus Solute carrier family 12, member 1 (bumetanide-sensitive sodium-(potassium)-chloride cotransporter) (Slc12a1), mRNA. /PROD=solute carrier family 12, member 1(bumetanide-sensitive sodium-(potassium)-chloridecotransporter) /FL=gb:U10096.1 gb:NM_019134.1	NM_019134	---
1368565_PM_at	0.0220468	1.15062	up	Slc1a3	solute carrier family 1 (glial high affinity glutamate transporter), member 3	29483	gb:NM_019225.1 /DB_XREF=gi:9507114 /GEN=Slc1a3 /FEA=FLmRNA /CNT=8 /TID=Rn.34134.1 /TIER=FL /STK=4 /UG=Rn.34134 /LL=29483 /DEF=Rattus norvegicus solute carrier family 1, member 3 (Slc1a3), mRNA. /PROD=solute carrier family 1, member 3 /FL=gb:NM_019225.1	NM_019225	ENSRNOG00000016163
1368579_PM_at	0.045633	1.07587	down	Prl2a1	Prolactin family 2, subfamily a, member 1	116474	gb:NM_053791.1 /DB_XREF=gi:16758631 /GEN=Prlpm /FEA=FLmRNA /CNT=6 /TID=Rn.17940.1 /TIER=FL /STK=4 /UG=Rn.17940 /LL=116474 /DEF=Rattus norvegicus prolactin-like protein M (Prlpm), mRNA. /PROD=prolactin-like protein M /FL=gb:AF226608.1 gb:NM_053791.1	NM_053791	ENSRNOG00000016463
1368607_PM_at	0.015772	1.15901	up	Cyp4a8	cytochrome P450, family 4, subfamily a, polypeptide 8	266674	gb:NM_031605.1 /DB_XREF=gi:13928827 /GEN=Cyp4a10 /FEA=FLmRNA /CNT=5 /TID=Rn.10034.1 /TIER=FL /STK=4 /UG=Rn.10034 /LL=50549 /DEF=Rattus norvegicus cytochrome P450, 4a10 (Cyp4a10), mRNA. /PROD=cytochrome P450, 4a10 /FL=gb:M37828.1 gb:NM_031605.1	NM_031605	---
1368612_PM_at	0.0158839	1.14726	down	Itgb4	integrin beta 4	25724	gb:NM_013180.1 /DB_XREF=gi:6981107 /GEN=Itgb4 /FEA=FLmRNA /CNT=4 /TID=Rn.10727.1 /TIER=FL /STK=4 /UG=Rn.10727 /LL=25724 /DEF=Rattus norvegicus Integrin, beta 4 (Itgb4), mRNA. /PROD=integrin, beta 4 /FL=gb:NM_013180.1 gb:U60096.1	NM_013180	ENSRNOG00000005580
1368614_PM_at	0.0281838	1.16157	down	Mlxipl	MLX interacting protein-like	171078	gb:NM_133552.1 /DB_XREF=gi:19424225 /GEN=Wbscr14 /FEA=FLmRNA /CNT=4 /TID=Rn.77647.1 /TIER=FL /STK=4 /UG=Rn.77647 /DEF=Rattus norvegicus Williams-Beuren syndrome chromosome region 14 homolog (human) (Wbscr14), mRNA. /PROD=Williams-Beuren syndrome chromosome region 14homolog (human) /FL=gb:AB074517.1 gb:NM_133552.1	NM_133552	---
1368622_PM_at	0.0368779	1.12516	down	Fbp2	fructose-1,6-bisphosphatase 2	114508	gb:NM_053716.1 /DB_XREF=gi:16758953 /GEN=Fbp2 /FEA=FLmRNA /CNT=4 /TID=Rn.15319.1 /TIER=FL /STK=4 /UG=Rn.15319 /LL=114508 /DEF=Rattus norvegicus fructose bisphosphatase 2 (Fbp2), mRNA. /PROD=fructose bisphosphatase 2 /FL=gb:NM_053716.1	NM_053716	ENSRNOG00000017637
1368629_PM_at	0.0261858	1.07611	down	Reg1a	regenerating islet-derived 1 alpha	24714	gb:NM_012641.1 /DB_XREF=gi:6981469 /GEN=Reg1 /FEA=FLmRNA /CNT=5 /TID=Rn.11332.1 /TIER=FL /STK=4 /UG=Rn.11332 /LL=24714 /DEF=Rattus norvegicus Regeneration protein, lithostatin, pancreatic stone protein (Reg1), mRNA. /PROD=regeneration protein, lithostatin, pancreaticstone protein /FL=gb:NM_012641.1 gb:M62930.1 gb:M18962.1	NM_012641	ENSRNOG00000006486
1368630_PM_at	0.015351	1.12557	down	Fabp9	fatty acid binding protein 9, testis	64822	gb:NM_022854.1 /DB_XREF=gi:12408303 /GEN=Tlbp /FEA=FLmRNA /CNT=5 /TID=Rn.10078.1 /TIER=FL /STK=4 /UG=Rn.10078 /LL=64822 /DEF=Rattus norvegicus testis lipid binding protein (Tlbp), mRNA. /PROD=testis lipid binding protein /FL=gb:NM_022854.1 gb:U07870.1	NM_022854	ENSRNOG00000011082
1368632_PM_at	0.0114086	1.13553	up	Foxg1	forkhead box G1	24370	gb:NM_012560.1 /DB_XREF=gi:6978844 /GEN=Fkhr /FEA=FLmRNA /CNT=5 /TID=Rn.9864.1 /TIER=FL /STK=4 /UG=Rn.9864 /LL=24370 /DEF=Rattus norvegicus Forkhead-like transcription factor BF-1 (Fkhr), mRNA. /PROD=forkhead-like transcription factor BF-1 /FL=gb:M87634.1 gb:NM_012560.1	NM_012560	---
1368635_PM_at	0.0347043	1.08683	down	Tnfrsf8	tumor necrosis factor receptor superfamily, member 8	25069	gb:NM_019135.1 /DB_XREF=gi:9507192 /GEN=Tnfrsf8 /FEA=FLmRNA /CNT=4 /TID=Rn.11322.1 /TIER=FL /STK=4 /UG=Rn.11322 /LL=25069 /DEF=Rattus norvegicus Tumor necrosis factor superfamily, member CD30 (Tnfrsf8), mRNA. /PROD=tumor necrosis factor superfamily, member CD30 /FL=gb:D42117.1 gb:NM_019135.1	NM_019135	---
1368643_PM_at	0.0281785	1.08811	down	Spata6	spermatogenesis associated 6	171413	gb:NM_134392.1 /DB_XREF=gi:19705506 /GEN=HASH /FEA=FLmRNA /CNT=16 /TID=Rn.8467.1 /TIER=FL /STK=3 /UG=Rn.8467 /LL=171413 /DEF=Rattus norvegicus kinesin-related protein HASH (HASH), mRNA. /PROD=kinesin-related protein HASH /FL=gb:AB046606.1 gb:AF291466.1 gb:NM_134392.1	NM_134392	ENSRNOG00000007568
1368663_PM_at	0.0413814	1.13029	down	LOC56764	dnaj-like protein	56764	gb:NM_020089.1 /DB_XREF=gi:9910321 /GEN=LOC56764 /FEA=FLmRNA /CNT=10 /TID=Rn.53916.1 /TIER=FL /STK=3 /UG=Rn.53916 /LL=56764 /DEF=Rattus norvegicus dnaj-like protein (LOC56764), mRNA. /PROD=dnaj-like protein /FL=gb:AF154849.1 gb:NM_020089.1	NM_020089	ENSRNOG00000016432
1368677_PM_at	0.0326937	1.19506	up	Bdnf	brain derived neurotrophic factor	24225	gb:NM_012513.1 /DB_XREF=gi:6978568 /GEN=Bdnf /FEA=FLmRNA /CNT=9 /TID=Rn.11266.1 /TIER=FL /STK=3 /UG=Rn.11266 /LL=24225 /DEF=Rattus norvegicus Brain derived neurothrophic factor (Bdnf), mRNA. /PROD=brain derived neurothrophic factor /FL=gb:NM_012513.1 gb:M61175.1	NM_012513	---
1368683_PM_at	0.0480656	1.09037	down	Olr1	oxidized low density lipoprotein (lectin-like) receptor 1	140914	gb:NM_133306.1 /DB_XREF=gi:18959247 /GEN=Olr1 /FEA=FLmRNA /CNT=8 /TID=Rn.14541.1 /TIER=FL /STK=3 /UG=Rn.14541 /LL=140914 /DEF=Rattus norvegicus oxidised low density lipoprotein (lectin-like) receptor 1 (Olr1), mRNA. /PROD=oxidised low density lipoprotein (lectin-like)receptor 1 /FL=gb:NM_133306.1 gb:AB005900.1	NM_133306	ENSRNOG00000008375
1368699_PM_at	0.00427286	1.13306	up	Dscam	Down syndrome cell adhesion molecule	171119	gb:NM_133587.1 /DB_XREF=gi:19424285 /GEN=Dscam /FEA=FLmRNA /CNT=7 /TID=Rn.46108.1 /TIER=FL /STK=3 /UG=Rn.46108 /DEF=Rattus norvegicus Down syndrome cell adhesion molecule (Dscam), mRNA. /PROD=Down syndrome cell adhesion molecule /FL=gb:NM_133587.1 gb:AF334385.1	NM_133587	ENSRNOG00000027992
1368707_PM_at	0.0232572	1.09611	down	Itih4	inter alpha-trypsin inhibitor, heavy chain 4	54404	gb:NM_019369.1 /DB_XREF=gi:9506818 /GEN=Itih4 /FEA=FLmRNA /CNT=5 /TID=Rn.11308.1 /TIER=FL /STK=3 /UG=Rn.11308 /LL=54404 /DEF=Rattus norvegicus inter-alpha-inhibitor H4 heavy chain (Itih4), mRNA. /PROD=inter-alpha-inhibitor H4 heavy chain /FL=gb:NM_019369.1	NM_019369	ENSRNOG00000017381
1368710_PM_at	0.00691314	1.16582	up	Mark2	MAP/microtubule affinity-regulating kinase 2	60328	gb:NM_021699.1 /DB_XREF=gi:11067436 /GEN=LOC60328 /FEA=FLmRNA /CNT=5 /TID=Rn.42926.1 /TIER=FL /STK=3 /UG=Rn.42926 /LL=60328 /DEF=Rattus norvegicus serinethreonine kinase (LOC60328), mRNA. /PROD=serinethreonine kinase /FL=gb:NM_021699.1	NM_021699	---
1368742_PM_at	0.0382926	1.0775	down	C5ar1	complement component 5a receptor 1	113959	gb:NM_053619.1 /DB_XREF=gi:16758417 /GEN=C5r1 /FEA=FLmRNA /CNT=5 /TID=Rn.10680.1 /TIER=FL /STK=3 /UG=Rn.10680 /LL=113959 /DEF=Rattus norvegicus complement component 5, receptor 1 (C5r1), mRNA. /PROD=complement component 5, receptor 1 /FL=gb:AB003042.1 gb:NM_053619.1	NM_053619	---
1368750_PM_a_at	0.0358724	1.21023	up	Pde4d	phosphodiesterase 4D, cAMP-specific (phosphodiesterase E3 dunce homolog, Drosophila)	24627	gb:NM_017032.1 /DB_XREF=gi:8393931 /GEN=Pde4d /FEA=FLmRNA /CNT=4 /TID=Rn.10004.1 /TIER=FL /STK=3 /UG=Rn.10004 /LL=24627 /DEF=Rattus norvegicus Phosphodiesterase 4D, cAMP-specific (dunce (Drosophila)-homolog phosphodiesterase E3) (Pde4d), mRNA. /PROD=phosphodiesterase 4D, cAMP-specific (dunce(Drosophila)-homolog phosphodiesterase E3) /FL=gb:NM_017032.1 gb:AF031373.1 gb:U09457.1	NM_017032	---
1368753_PM_at	0.0123831	1.25429	up	Camkk2	calcium/calmodulin-dependent protein kinase kinase 2, beta	83506	gb:NM_031338.1 /DB_XREF=gi:13786171 /GEN=Camkk2 /FEA=FLmRNA /CNT=4 /TID=Rn.30038.1 /TIER=FL /STK=3 /UG=Rn.30038 /LL=83506 /DEF=Rattus norvegicus Ca+Calmodulin-dependent protein kinase kinase beta (CaM-kinase kinase beta) (Camkk2), mRNA. /PROD=Ca+Calmodulin-dependent protein kinase kinasebeta (CaM-kinase kinase beta) /FL=gb:NM_031338.1 gb:AB018081.1	NM_031338	---
1368756_PM_at	0.0262124	1.09393	down	Olah	oleoyl-ACP hydrolase	64669	gb:NM_022705.1 /DB_XREF=gi:12083670 /GEN=Mch /FEA=FLmRNA /CNT=4 /TID=Rn.9674.1 /TIER=FL /STK=3 /UG=Rn.9674 /LL=64669 /DEF=Rattus norvegicus medium-chain S-acyl fatty acid synthetase thio ester hydrolase (MCH) (Mch), mRNA. /PROD=medium-chain S-acyl fatty acid synthetase thioester hydrolase (MCH) /FL=gb:NM_022705.1 gb:M16200.1	NM_022705	---
1368776_PM_at	0.0051544	1.11335	down	Alox5	arachidonate 5-lipoxygenase	25290	gb:NM_012822.1 /DB_XREF=gi:6978492 /GEN=Alox5 /FEA=FLmRNA /CNT=3 /TID=Rn.9662.1 /TIER=FL /STK=3 /UG=Rn.9662 /LL=25290 /DEF=Rattus norvegicus arachidonate 5-lipoxygenase (Alox5), mRNA. /PROD=arachidonate 5-lipoxygenase /FL=gb:NM_012822.1 gb:J03960.1	NM_012822	ENSRNOG00000012972
1368778_PM_at	0.00571331	1.33972	up	Slc6a6	solute carrier family 6 (neurotransmitter transporter, taurine), member 6	29464	gb:NM_017206.1 /DB_XREF=gi:8394317 /GEN=Slc6a6 /FEA=FLmRNA /CNT=3 /TID=Rn.9968.1 /TIER=FL /STK=3 /UG=Rn.9968 /LL=29464 /DEF=Rattus norvegicus Solute carrier 6 ,member 6 (taurine transporter) (Slc6a6), mRNA. /PROD=taurinebeta-alanine transporter /FL=gb:M96601.1 gb:NM_017206.1	NM_017206	ENSRNOG00000009019
1368782_PM_at	0.0276279	1.18139	up	Sstr2	somatostatin receptor 2	54305	gb:NM_019348.1 /DB_XREF=gi:11225271 /GEN=Sstr2 /FEA=FLmRNA /CNT=3 /TID=Rn.9929.1 /TIER=FL /STK=3 /UG=Rn.9929 /LL=54305 /DEF=Rattus norvegicus somatostatin receptor subtype 2 (Sstr2), mRNA. /PROD=somatostatin receptor subtype 2 /FL=gb:M96817.1 gb:M93273.1 gb:NM_019348.1	NM_019348	ENSRNOG00000002793
1368783_PM_at	0.0275048	1.12183	down	Icos	inducible T-cell co-stimulator	64545	gb:NM_022610.1 /DB_XREF=gi:12018285 /GEN=Ailim /FEA=FLmRNA /CNT=3 /TID=Rn.42901.1 /TIER=FL /STK=3 /UG=Rn.42901 /LL=64545 /DEF=Rattus norvegicus activation-inducible lymphocyte immunomediatory molecule (Ailim), mRNA. /PROD=activation-inducible lymphocyte immunomediatorymolecule /FL=gb:NM_022610.1 gb:AB023134.1	NM_022610	---
1368789_PM_at	0.0269748	1.16906	down	Acpp	acid phosphatase, prostate	56780	gb:NM_020072.1 /DB_XREF=gi:9910501 /GEN=Ppal /FEA=FLmRNA /CNT=3 /TID=Rn.40121.1 /TIER=FL /STK=3 /UG=Rn.40121 /LL=56780 /DEF=Rattus norvegicus prostatic acid phosphatase (rPAP) (Ppal), mRNA. /PROD=prostatic acid phosphatase (rPAP) /FL=gb:M32397.1 gb:NM_020072.1	NM_020072	---
1368792_PM_at	0.0217804	1.37274	up	Psen1	presenilin 1	29192	gb:NM_019163.1 /DB_XREF=gi:9507000 /GEN=Psen1 /FEA=FLmRNA /CNT=3 /TID=Rn.44440.1 /TIER=FL /STK=3 /UG=Rn.44440 /LL=29192 /DEF=Rattus norvegicus presenilin 1 (Psen1), mRNA. /PROD=presenilin 1 /FL=gb:D82578.1 gb:D82363.1 gb:NM_019163.1	NM_019163	ENSRNOG00000009110
1368822_PM_at	0.00421522	1.17696	up	Fstl1	follistatin-like 1	79210	gb:BI290885 /DB_XREF=gi:14949892 /DB_XREF=UI-R-DK0-cgi-f-09-0-UI.s1 /CLONE=UI-R-DK0-cgi-f-09-0-UI /FEA=FLmRNA /CNT=43 /TID=Rn.2979.1 /TIER=ConsEnd /STK=4 /UG=Rn.2979 /LL=79210 /UG_GENE=Frp /UG_TITLE=follistatin-related protein precursor /FL=gb:U06864.1 gb:NM_024369.1	BI290885	---
1368832_PM_at	0.00889693	1.25605	up	Akt2	v-akt murine thymoma viral oncogene homolog 2	25233	gb:NM_017093.1 /DB_XREF=gi:8392887 /GEN=Akt2 /FEA=FLmRNA /CNT=24 /TID=Rn.4293.1 /TIER=FL /STK=2 /UG=Rn.4293 /LL=25233 /DEF=Rattus norvegicus Murine thymoma viral (v-akt) oncogene homolog 2 (Akt2), mRNA. /PROD=murine thymoma viral (v-akt) oncogene homolog 2 /FL=gb:NM_017093.1 gb:D30041.1	NM_017093	ENSRNOG00000018677
1368844_PM_at	0.0372029	1.09502	up	Hspa13	heat shock protein 70kDa family, member 13	29734	gb:NM_019271.1 /DB_XREF=gi:9507148 /GEN=Stch /FEA=FLmRNA /CNT=15 /TID=Rn.11050.1 /TIER=FL /STK=2 /UG=Rn.11050 /LL=29734 /DEF=Rattus norvegicus stress 70 protein chaperone, microsome-associated, 60kD human homolog (Stch), mRNA. /PROD=stress 70 protein chaperone,microsome-associated, 60kD human homolog /FL=gb:AF006617.1 gb:NM_019271.1	NM_019271	ENSRNOG00000032834
1368857_PM_at	0.0404519	1.08826	up	Ugt8	UDP glycosyltransferase 8	50555	gb:NM_019276.2 /DB_XREF=gi:19923683 /GEN=Ugt8 /FEA=FLmRNA /CNT=15 /TID=Rn.9744.1 /TIER=FL /STK=2 /UG=Rn.9744 /LL=50555 /DEF=Rattus norvegicus UDP-glucuronosyltransferase 8 (Ugt8), mRNA. /PROD=UDP-glucuronosyltransferase 8 /FL=gb:L21698.1 gb:U07683.1 gb:NM_019276.2	NM_019276	---
1368866_PM_at	0.0327297	1.50858	up	Eif2c2	eukaryotic translation initiation factor 2C, 2	59117	gb:NM_021597.1 /DB_XREF=gi:11024679 /GEN=Gerp95 /FEA=FLmRNA /CNT=19 /TID=Rn.35512.1 /TIER=FL /STK=2 /UG=Rn.35512 /LL=59117 /DEF=Rattus norvegicus GERp95 (Gerp95), mRNA. /PROD=GERp95 /FL=gb:NM_021597.1 gb:AF195534.1	NM_021597	ENSRNOG00000008533
1368867_PM_at	0.0421506	1.41535	up	Eif2c2	eukaryotic translation initiation factor 2C, 2	59117	gb:BF281131 /DB_XREF=gi:11212285 /DB_XREF=EST445806 /CLONE=RGIAB46 /FEA=FLmRNA /CNT=19 /TID=Rn.35512.1 /TIER=Stack /STK=8 /UG=Rn.35512 /LL=59117 /UG_GENE=Gerp95 /UG_TITLE=GERp95 /FL=gb:NM_021597.1 gb:AF195534.1	BF281131	ENSRNOG00000008533
1368879_PM_a_at	0.00258551	1.24853	up	Gnao1	guanine nucleotide binding protein (G protein), alpha activating activity polypeptide O	50664	gb:AF413212.1 /DB_XREF=gi:19033102 /FEA=mRNA /CNT=1 /TID=Rn.11268.2 /TIER=ConsEnd /STK=0 /UG=Rn.11268 /LL=50664 /UG_GENE=RATBPGTPC /DEF=Rattus norvegicus GOA1B splice variant mRNA, partial cds; alternatively spliced. /PROD=GOA1B splice variant	AF413212	ENSRNOG00000019482
1368891_PM_at	0.00267472	1.10917	down	Gnpat	glyceronephosphate O-acyltransferase	84470	gb:AI014001 /DB_XREF=gi:3226937 /DB_XREF=EST207556 /CLONE=RSPBD14 /FEA=FLmRNA /CNT=14 /TID=Rn.1739.1 /TIER=ConsEnd /STK=1 /UG=Rn.1739 /LL=84470 /UG_GENE=Gnpat /UG_TITLE=acyl-CoA:dihydroxyacetonephosphate acyltransferase /FL=gb:NM_053410.1 gb:AF218826.1	AI014001	ENSRNOG00000019205
1368896_PM_at	0.00871292	1.19912	up	Smad7	SMAD family member 7	81516	gb:NM_030858.1 /DB_XREF=gi:13540678 /GEN=Madh7 /FEA=FLmRNA /CNT=11 /TID=Rn.29980.1 /TIER=FL /STK=2 /UG=Rn.29980 /LL=81516 /DEF=Rattus norvegicus MAD (mothers against decapentaplegic, Drosophila) homolog 7 (Madh7), mRNA. /PROD=MAD (mothers against decapentaplegic,Drosophila) homolog 7 /FL=gb:NM_030858.1 gb:AF042499.1 gb:AF159626.1	NM_030858	ENSRNOG00000018359
1368897_PM_at	0.00314069	1.1509	up	Smad7	SMAD family member 7	81516	gb:AF042499.1 /DB_XREF=gi:3282768 /FEA=FLmRNA /CNT=11 /TID=Rn.29980.1 /TIER=FL /STK=1 /UG=Rn.29980 /LL=81516 /UG_GENE=Madh7 /DEF=Rattus norvegicus Smad7 mRNA, complete cds. /PROD=Smad7 /FL=gb:NM_030858.1 gb:AF042499.1 gb:AF159626.1	AF042499	ENSRNOG00000018359
1368902_PM_at	0.0126681	1.17943	up	Pak3	p21 protein (Cdc42/Rac)-activated kinase 3	29433	gb:NM_019210.1 /DB_XREF=gi:9506946 /GEN=Pak3 /FEA=FLmRNA /CNT=11 /TID=Rn.10128.1 /TIER=FL /STK=2 /UG=Rn.10128 /LL=29433 /DEF=Rattus norvegicus p21 (CDKN1A)-activated kinase 3 (Pak3), mRNA. /PROD=p21 (CDKN1A)-activated kinase 3 /FL=gb:NM_019210.1 gb:U33314.1	NM_019210	ENSRNOG00000004676
1368943_PM_at	0.0123279	1.32786	down	Rnase4	ribonuclease, RNase A family 4	56759	gb:NM_020082.1 /DB_XREF=gi:9910535 /GEN=Rnase4 /FEA=FLmRNA /CNT=7 /TID=Rn.22804.1 /TIER=FL /STK=2 /UG=Rn.22804 /LL=56759 /DEF=Rattus norvegicus ribonuclease 4 (Rnase4), mRNA. /PROD=ribonuclease 4 /FL=gb:NM_020082.1 gb:AF041066.1	NM_020082	ENSRNOG00000025625
1368945_PM_at	0.0220875	1.25688	up	Bmp2	bone morphogenetic protein 2	29373	gb:NM_017178.1 /DB_XREF=gi:8392989 /GEN=Bmp2 /FEA=FLmRNA /CNT=16 /TID=Rn.12687.1 /TIER=FL /STK=2 /UG=Rn.12687 /LL=29373 /DEF=Rattus norvegicus bone morphogenetic protein 2 (Bmp2), mRNA. /PROD=bone morphogenetic protein 2 /FL=gb:NM_017178.1	NM_017178	ENSRNOG00000021276
1368949_PM_at	0.00299329	1.2037	up	Ebf1	early B-cell factor 1	116543	gb:NM_053820.1 /DB_XREF=gi:16758667 /GEN=Ebf /FEA=FLmRNA /CNT=9 /TID=Rn.11257.1 /TIER=FL /STK=2 /UG=Rn.11257 /LL=116543 /DEF=Rattus norvegicus early B-cell factor (olfactory neuronal transcription factor 1) (Ebf), mRNA. /PROD=early B-cell factor (olfactory neuronaltranscription factor 1) /FL=gb:NM_053820.1 gb:L24051.1	NM_053820	---
1368972_PM_at	0.0187897	1.14947	up	Ntrk2	neurotrophic tyrosine kinase, receptor, type 2	25054	gb:NM_012731.1 /DB_XREF=gi:6981293 /GEN=Ntrk2 /FEA=FLmRNA /CNT=6 /TID=Rn.11246.1 /TIER=FL /STK=2 /UG=Rn.11246 /LL=25054 /DEF=Rattus norvegicus Neural receptor protein-tyrosine kinase (trkB) (Ntrk2), mRNA. /PROD=neural receptor protein-tyrosine kinase (trkB) /FL=gb:M55291.1 gb:NM_012731.1	NM_012731	ENSRNOG00000018839
1368973_PM_at	0.0311305	1.18993	up	Adar	adenosine deaminase, RNA-specific	81635	gb:NM_031006.1 /DB_XREF=gi:13591903 /GEN=Adar /FEA=FLmRNA /CNT=6 /TID=Rn.10056.1 /TIER=FL /STK=2 /UG=Rn.10056 /LL=81635 /DEF=Rattus norvegicus adenosine deaminase RNA-specific (Adar), mRNA. /PROD=adenosine deaminase RNA-specific /FL=gb:U18942.1 gb:NM_031006.1	NM_031006	ENSRNOG00000020744
1368991_PM_at	0.0211874	1.17988	up	Smpd3	sphingomyelin phosphodiesterase 3, neutral	94338	gb:NM_053605.1 /DB_XREF=gi:16758393 /GEN=Smpd3 /FEA=FLmRNA /CNT=8 /TID=Rn.54555.1 /TIER=FL /STK=2 /UG=Rn.54555 /LL=94338 /DEF=Rattus norvegicus sphingomyelin phosphodiesterase 3, neutral (Smpd3), mRNA. /PROD=sphingomyelin phosphodiesterase 3, neutral /FL=gb:NM_053605.1 gb:AB000215.1	NM_053605	ENSRNOG00000000257
1368996_PM_at	0.0498628	1.10986	down	Ceacam3	carcinoembryonic antigen-related cell adhesion molecule 3	24926	gb:NM_012702.1 /DB_XREF=gi:6978644 /GEN=Ceacam3 /FEA=FLmRNA /CNT=7 /TID=Rn.10064.1 /TIER=FL /STK=2 /UG=Rn.10064 /LL=24926 /DEF=Rattus norvegicus Carcinoembryonic antigen gene family (CGM1) (Ceacam3), mRNA. /PROD=carcinoembryonic antigen gene family (CGM1) /FL=gb:NM_012702.1 gb:M32474.1	NM_012702	ENSRNOG00000027607
1368997_PM_at	0.0169342	1.09309	up	Tceb3	transcription elongation factor B (SIII), polypeptide 3	25562	gb:NM_017103.1 /DB_XREF=gi:8394424 /GEN=Tceb3 /FEA=FLmRNA /CNT=7 /TID=Rn.37427.1 /TIER=FL /STK=2 /UG=Rn.37427 /LL=25562 /DEF=Rattus norvegicus RNA polymerase II transcription factor elongin subunit A (110 kDa) (Tceb3), mRNA. /PROD=RNA polymerase II transcription factor elonginsubunit A (110 kDa) /FL=gb:NM_017103.1 gb:L46816.1	NM_017103	---
1369007_PM_at	0.00762409	1.22034	up	Nr4a2	nuclear receptor subfamily 4, group A, member 2	54278	gb:L08595.1 /DB_XREF=gi:310215 /GEN=RNR-1 /FEA=FLmRNA /CNT=6 /TID=Rn.9839.1 /TIER=FL /STK=2 /UG=Rn.9839 /LL=54278 /DEF=Rat nuclear receptor (RNR-1) mRNA, complete cds. /PROD=nuclear receptor /FL=gb:NM_019328.1 gb:U01146.1 gb:U72345.1 gb:L08595.1	L08595	ENSRNOG00000005600
1369008_PM_a_at	0.00130637	1.1759	up	Olfm1	olfactomedin 1	93667	gb:NM_053573.1 /DB_XREF=gi:17865342 /GEN=Olfm1 /FEA=FLmRNA /CNT=6 /TID=Rn.11005.1 /TIER=FL /STK=2 /UG=Rn.11005 /LL=93667 /DEF=Rattus norvegicus olfactomedin related ER localized protein (Olfm1), mRNA. /PROD=olfactomedin related ER localized protein /FL=gb:U03417.1 gb:NM_053573.1	NM_053573	ENSRNOG00000009862
1369012_PM_at	0.0215343	1.16958	up	Inhba	inhibin beta-A	29200	gb:NM_017128.1 /DB_XREF=gi:8393612 /GEN=Inhba /FEA=FLmRNA /CNT=6 /TID=Rn.9874.1 /TIER=FL /STK=2 /UG=Rn.9874 /LL=29200 /DEF=Rattus norvegicus inhibin beta-A (Inhba), mRNA. /PROD=inhibin beta-A /FL=gb:NM_017128.1 gb:M37482.1	NM_017128	ENSRNOG00000014320
1369047_PM_at	0.0330063	1.0873	down	Sult1d1	sulfotransferase family 1D, member 1	60393	gb:NM_021769.1 /DB_XREF=gi:11120723 /GEN=Sult-n /FEA=FLmRNA /CNT=6 /TID=Rn.45325.1 /TIER=FL /STK=2 /UG=Rn.45325 /LL=60393 /DEF=Rattus norvegicus tyrosine-ester sulfotransferase (Sult-n), mRNA. /PROD=tyrosine-ester sulfotransferase /FL=gb:U32372.1 gb:NM_021769.1	NM_021769	ENSRNOG00000001960
1369066_PM_at	0.010499	1.1045	up	Madd	MAP-kinase activating death domain	94193	gb:NM_053585.1 /DB_XREF=gi:16758359 /GEN=Madd /FEA=FLmRNA /CNT=4 /TID=Rn.6406.1 /TIER=FL /STK=2 /UG=Rn.6406 /LL=94193 /DEF=Rattus norvegicus MAP-kinase activating death domain (Madd), mRNA. /PROD=MAP-kinase activating death domain /FL=gb:U72995.1 gb:NM_053585.1	NM_053585	ENSRNOG00000012568
1369071_PM_at	0.0110832	1.13055	up	S1pr1	sphingosine-1-phosphate receptor 1	29733	gb:NM_017301.1 /DB_XREF=gi:8393289 /GEN=Edg1 /FEA=FLmRNA /CNT=4 /TID=Rn.4102.1 /TIER=FL /STK=2 /UG=Rn.4102 /LL=29733 /DEF=Rattus norvegicus endothelial differentiation sphingolipid G-protein-coupled receptor 1 (Edg1), mRNA. /PROD=endothelial differentiation sphingolipidG-protein-coupled receptor 1 /FL=gb:U10303.1 gb:NM_017301.1	NM_017301	---
1369103_PM_at	0.0188023	1.2322	up	Fyn	FYN oncogene related to SRC, FGR, YES	25150	gb:NM_012755.1 /DB_XREF=gi:6978862 /GEN=Fyn /FEA=FLmRNA /CNT=4 /TID=Rn.2432.1 /TIER=FL /STK=2 /UG=Rn.2432 /LL=25150 /DEF=Rattus norvegicus Fyn proto-oncogene (Fyn), mRNA. /PROD=fyn proto-oncogene /FL=gb:NM_012755.1 gb:U35365.1	NM_012755	ENSRNOG00000000596
1369110_PM_x_at	0.0402791	1.1294	down	RT1-Aw2	RT1 class Ib, locus Aw2	24737	gb:NM_012645.1 /DB_XREF=gi:6981493 /GEN=RT1Aw2 /FEA=FLmRNA /CNT=7 /TID=Rn.39743.1 /TIER=FL /STK=2 /UG=Rn.39743 /LL=24737 /DEF=Rattus norvegicus RT1 class Ib gene (RT1Aw2), mRNA. /PROD=RT1 class Ib gene RT1Aw2 /FL=gb:NM_012645.1 gb:M31038.1	NM_012645	---
1369134_PM_x_at	0.0185094	1.11448	down	Kcnc3	potassium voltage gated channel, Shaw-related subfamily, member 3	117101	gb:NM_053997.1 /DB_XREF=gi:16758905 /GEN=Kcnc3 /FEA=FLmRNA /CNT=5 /TID=Rn.9885.1 /TIER=FL /STK=2 /UG=Rn.9885 /LL=117101 /DEF=Rattus norvegicus potassium voltage gated channel, Shaw-related subfamily, member 3 (Kcnc3), mRNA. /PROD=potassium voltage gated channel, Shaw-relatedsubfamily, member 3 /FL=gb:NM_053997.1 gb:M84211.1	NM_053997	---
1369144_PM_a_at	0.00723681	1.26396	up	Kcnd3	potassium voltage gated channel, Shal-related family, member 3	65195	gb:NM_031739.1 /DB_XREF=gi:13929039 /GEN=Kcnd3 /FEA=FLmRNA /CNT=5 /TID=Rn.10540.1 /TIER=FL /STK=2 /UG=Rn.10540 /LL=65195 /DEF=Rattus norvegicus potassium voltage gated channel, Shal-related family, member 2 (Kcnd3), mRNA. /PROD=potassium voltage gated channel, Shal-relatedfamily, member 2 /FL=gb:U42975.1 gb:U75448.1 gb:NM_031739.1	NM_031739	---
1369174_PM_at	0.0410142	1.20107	up	Smad1	SMAD family member 1	25671	gb:NM_013130.1 /DB_XREF=gi:6981171 /GEN=Madh1 /FEA=FLmRNA /CNT=4 /TID=Rn.10635.1 /TIER=FL /STK=2 /UG=Rn.10635 /LL=25671 /DEF=Rattus norvegicus MAD (mothers against decapentaplegic, Drosophila) homolog 1 (Madh1), mRNA. /PROD=MAD homolog1 (mothers against decapentaplegic,Drosophila) /FL=gb:NM_013130.1 gb:AF067727.1 gb:U66478.1	NM_013130	ENSRNOG00000018483
1369202_PM_at	0.0211953	1.07599	up	Mx2	myxovirus (influenza virus) resistance 2	286918	gb:NM_017028.1 /DB_XREF=gi:8393796 /GEN=Mx1 /FEA=FLmRNA /CNT=4 /TID=Rn.10374.1 /TIER=FL /STK=2 /UG=Rn.10374 /LL=24575 /DEF=Rattus norvegicus Myxovirus (influenza) resistance, homolog of murine Mx (also interferon-inducible protein IFI78) (Mx1), mRNA. /PROD=myxovirus (influenza) resistance, homolog ofmurine Mx (also interferon-inducible protein IFI78) /FL=gb:NM_017028.1	NM_017028	---
1369205_PM_at	0.0129643	1.17413	up	Neurog1	neurogenin 1	29410	gb:NM_019207.1 /DB_XREF=gi:9506918 /GEN=Neurod3 /FEA=FLmRNA /CNT=4 /TID=Rn.10606.1 /TIER=FL /STK=2 /UG=Rn.10606 /LL=29410 /DEF=Rattus norvegicus neurogenic differentiation 3 (Neurod3), mRNA. /PROD=neurogenic differentiation 3 /FL=gb:U67777.1 gb:NM_019207.1	NM_019207	ENSRNOG00000022405
1369275_PM_s_at	0.0349156	1.07011	down	Cyp2a1 /// Cyp2a2	cytochrome P450, subfamily 2A, polypeptide 1"///"cytochrome P450 IIA1 (hepatic steroid hydroxylase IIA1) gene	24895///24894	gb:NM_012692.1 /DB_XREF=gi:6978738 /GEN=Cyp2a1 /FEA=FLmRNA /CNT=3 /TID=Rn.32107.1 /TIER=FL /STK=2 /UG=Rn.32107 /LL=24894 /DEF=Rattus norvegicus Cytochrome P450 IIA1 (hepatic steroid hydroxylase IIA1) gene (Cyp2a1), mRNA. /PROD=cytochrome P450 IIA1 (hepatic steroidhydroxylase IIA1) gene /FL=gb:NM_012692.1 gb:J02669.1	NM_012692	ENSRNOG00000020817 /// ENSRNOG00000020928
1369276_PM_at	0.0285575	1.15575	down	Smad5	SMAD family member 5	59328	gb:NM_021692.1 /DB_XREF=gi:11067422 /GEN=Madh5 /FEA=FLmRNA /CNT=3 /TID=Rn.42904.1 /TIER=FL /STK=2 /UG=Rn.42904 /LL=59328 /DEF=Rattus norvegicus Smad5 (Madh5), mRNA. /PROD=Smad5 /FL=gb:NM_021692.1 gb:AB010955.1	NM_021692	ENSRNOG00000022870
1369278_PM_at	0.0297111	1.29564	up	Gna12	guanine nucleotide binding protein, alpha 12	81663	gb:NM_031034.1 /DB_XREF=gi:13591952 /GEN=Gna12 /FEA=FLmRNA /CNT=3 /TID=Rn.10497.1 /TIER=FL /STK=2 /UG=Rn.10497 /LL=81663 /DEF=Rattus norvegicus guanine nucleotide binding protein (G protein) alpha 12 (Gna12), mRNA. /PROD=guanine nucleotide binding protein (G protein)alpha 12 /FL=gb:D85760.1 gb:NM_031034.1	NM_031034	ENSRNOG00000001235
1369290_PM_at	0.0239935	1.09387	down	Ccr5	chemokine (C-C motif) receptor 5	117029	gb:NM_053960.1 /DB_XREF=gi:16758945 /GEN=Cmkbr5 /FEA=FLmRNA /CNT=3 /TID=Rn.10736.1 /TIER=FL /STK=2 /UG=Rn.10736 /LL=117029 /DEF=Rattus norvegicus chemokine (C-C) receptor 5 (Cmkbr5), mRNA. /PROD=chemokine (C-C) receptor 5 /FL=gb:NM_053960.1	NM_053960	ENSRNOG00000006774
1369294_PM_at	0.014501	1.28748	down	Bst1	bone marrow stromal cell antigen 1	81506	gb:NM_030848.1 /DB_XREF=gi:13540657 /GEN=Bst1 /FEA=FLmRNA /CNT=3 /TID=Rn.10728.1 /TIER=FL /STK=2 /UG=Rn.10728 /LL=81506 /DEF=Rattus norvegicus bone marrow stromal cell antigen 1 (Bst1), mRNA. /PROD=bone marrow stromal cell antigen 1 /FL=gb:NM_030848.1 gb:D49955.1	NM_030848	---
1369304_PM_at	0.0134933	1.09424	down	Pts	6-pyruvoyl-tetrahydropterin synthase	29498	gb:NM_017220.1 /DB_XREF=gi:8394114 /GEN=Pts /FEA=FLmRNA /CNT=3 /TID=Rn.11125.1 /TIER=FL /STK=2 /UG=Rn.11125 /LL=29498 /DEF=Rattus norvegicus 6-pyruvoyl-tetrahydropterin synthase (Pts), mRNA. /PROD=6-pyruvoyl-tetrahydropterin synthase /FL=gb:M77850.1 gb:NM_017220.1	NM_017220	ENSRNOG00000009250
1369307_PM_at	0.0325496	1.14694	up	Ep300	E1A binding protein p300	170915	gb:NM_133403.1 /DB_XREF=gi:19173763 /GEN=Ep300 /FEA=FLmRNA /CNT=3 /TID=Rn.48331.1 /TIER=FL /STK=2 /UG=Rn.48331 /DEF=Rattus norvegicus E1A binding protein p300 (Ep300), mRNA. /PROD=E1A binding protein p300 /FL=gb:AB066220.1 gb:NM_133403.1	NM_133403	ENSRNOG00000000190
1369310_PM_at	0.0136114	1.16226	up	Basp1	brain abundant, membrane attached signal protein 1	64160	gb:NM_022300.1 /DB_XREF=gi:11560134 /GEN=Basp1 /FEA=FLmRNA /CNT=3 /TID=Rn.37779.1 /TIER=FL /STK=2 /UG=Rn.37779 /LL=64160 /DEF=Rattus norvegicus brain acidic membrane protein (Basp1), mRNA. /PROD=brain acidic membrane protein /FL=gb:D14441.1 gb:NM_022300.1	NM_022300	ENSRNOG00000025188
1369316_PM_s_at	0.0222706	1.14706	up	Snap29	synaptosomal-associated protein 29	116500	gb:NM_053810.1 /DB_XREF=gi:16758653 /GEN=Snap29 /FEA=FLmRNA /CNT=3 /TID=Rn.30053.1 /TIER=FL /STK=2 /UG=Rn.30053 /LL=116500 /DEF=Rattus norvegicus synaptosomal-associated protein, 29kD (Snap29), mRNA. /PROD=synaptosomal-associated protein, 29kD /FL=gb:NM_053810.1 gb:AF260577.1	NM_053810	ENSRNOG00000001867
1369365_PM_at	0.0313428	1.1135	down	Pde3a	phosphodiesterase 3A, cGMP inhibited	50678	gb:NM_017337.1 /DB_XREF=gi:8567397 /GEN=Pde3a /FEA=FLmRNA /CNT=2 /TID=Rn.44403.1 /TIER=FL /STK=2 /UG=Rn.44403 /LL=50678 /DEF=Rattus norvegicus phosphodiesterase 3A, cGMP inhibited (Pde3a), mRNA. /PROD=cyclic nucleotide phosphodiesterase /FL=gb:NM_017337.1 gb:U38179.1	NM_017337	ENSRNOG00000025042
1369370_PM_s_at	0.0197175	1.15428	down	Trpv1 /// Trpv4	transient receptor potential cation channel, subfamily V, member 1 /// transient receptor potential cation channel, subfamily V, member 4	83810///66026	gb:NM_023970.1 /DB_XREF=gi:13027423 /GEN=Otrpc4-pending /FEA=FLmRNA /CNT=2 /TID=Rn.64508.1 /TIER=FL /STK=2 /UG=Rn.64508 /LL=66026 /DEF=Rattus norvegicus osmosensitive transient receptor potential channel 4 (Otrpc4-pending), mRNA. /PROD=vanilloid receptor-related osmotically activatedchannel (Vroac) /FL=gb:NM_023970.1 gb:AF263521.1	NM_023970	ENSRNOG00000001195
1369371_PM_a_at	0.0384065	1.1802	up	Gabbr1	gamma-aminobutyric acid (GABA) B receptor 1	81657	gb:Y10369.1 /DB_XREF=gi:1929418 /GEN=GABA-BR1a /FEA=mRNA /CNT=1 /TID=Rn.30059.5 /TIER=ConsEnd /STK=0 /UG=Rn.30059 /LL=81657 /UG_TITLE=gamma-aminobutyric acid (GABA) B receptor, 1 /DEF=R.norvegicus mRNA for GABA-BR1a receptor.	Y10369	ENSRNOG00000000774
1369387_PM_at	0.0499096	1.11648	up	Vav1	vav 1 guanine nucleotide exchange factor	25156	gb:NM_012759.1 /DB_XREF=gi:6981697 /GEN=Vav1 /FEA=FLmRNA /CNT=2 /TID=Rn.48861.1 /TIER=FL /STK=2 /UG=Rn.48861 /LL=25156 /DEF=Rattus norvegicus Vav 1 oncogene (Vav1), mRNA. /PROD=vav 1 oncogene /FL=gb:U39476.1 gb:NM_012759.1	NM_012759	---
1369418_PM_at	0.0379495	1.05383	down	Kcnj9	potassium inwardly-rectifying channel, subfamily J, member 9	116560	gb:NM_053834.1 /DB_XREF=gi:16758687 /GEN=Kcnj9 /FEA=FLmRNA /CNT=2 /TID=Rn.10274.1 /TIER=FL /STK=2 /UG=Rn.10274 /LL=116560 /DEF=Rattus norvegicus potassium inwardly-rectifying channel, subfamily J, member 9 (Kcnj9), mRNA. /PROD=potassium inwardly-rectifying channel, subfamilyJ, member 9 /FL=gb:NM_053834.1 gb:L77929.1	NM_053834	---
1369437_PM_at	0.012383	1.09234	down	Slco4a1	solute carrier organic anion transporter family, member 4a1	171144	gb:NM_133608.1 /DB_XREF=gi:19424319 /GEN=Slc21a12 /FEA=FLmRNA /CNT=2 /TID=Rn.67081.1 /TIER=FL /STK=2 /UG=Rn.67081 /LL=171144 /DEF=Rattus norvegicus solute carrier family 21 (organic anion transporter), member 12 (Slc21a12), mRNA. /PROD=solute carrier family 21 (organic aniontransporter), member 12 /FL=gb:NM_133608.1 gb:AF239262.1	NM_133608	ENSRNOG00000021870
1369443_PM_at	0.0210796	1.22782	up	Angptl2	angiopoietin-like 2	171100	gb:NM_133569.1 /DB_XREF=gi:19424253 /GEN=Angptl2 /FEA=FLmRNA /CNT=2 /TID=Rn.54464.1 /TIER=FL /STK=2 /UG=Rn.54464 /LL=171100 /DEF=Rattus norvegicus angiopoietin-like 2 (Angptl2), mRNA. /PROD=angiopoietin-like 2 /FL=gb:AF159049.1 gb:NM_133569.1	NM_133569	ENSRNOG00000016678
1369444_PM_at	0.00732427	1.11556	down	Cyp19a1	cytochrome P450, family 19, subfamily a, polypeptide 1	25147	gb:NM_017085.1 /DB_XREF=gi:8393226 /GEN=Cyp19 /FEA=FLmRNA /CNT=2 /TID=Rn.21402.1 /TIER=FL /STK=2 /UG=Rn.21402 /LL=25147 /DEF=Rattus norvegicus Cytochrome P450, 19, aromatase (Cyp19), mRNA. /PROD=cytochrome P450, 19, aromatase /FL=gb:NM_017085.1 gb:M33986.1	NM_017085	ENSRNOG00000000196
1369454_PM_at	0.0397773	1.11285	down	Vdr	vitamin D (1,25- dihydroxyvitamin D3) receptor	24873	gb:NM_017058.1 /DB_XREF=gi:8394528 /GEN=Vdr /FEA=FLmRNA /CNT=2 /TID=Rn.10911.1 /TIER=FL /STK=2 /UG=Rn.10911 /LL=24873 /DEF=Rattus norvegicus Vitamin D (1,25-dihydroxyvitamin D3) receptor (Vdr), mRNA. /PROD=vitamin D (1,25-dihydroxyvitamin D3) receptor /FL=gb:NM_017058.1 gb:J04147.1	NM_017058	ENSRNOG00000008574
1369482_PM_a_at	0.0374416	1.08278	down	Syn2	synapsin II	29179	gb:NM_019159.1 /DB_XREF=gi:9507160 /GEN=Syn2 /FEA=FLmRNA /CNT=2 /TID=Rn.506.1 /TIER=FL /STK=2 /UG=Rn.506 /LL=29179 /DEF=Rattus norvegicus synapsin II (Syn2), mRNA. /PROD=synapsin II /FL=gb:M27926.1 gb:NM_019159.1	NM_019159	ENSRNOG00000008157
1369526_PM_at	0.0330303	1.22516	up	Acadsb	acyl-Coenzyme A dehydrogenase, short/branched chain	25618	gb:NM_013084.1 /DB_XREF=gi:6978432 /GEN=Acadsb /FEA=FLmRNA /CNT=2 /TID=Rn.44423.1 /TIER=FL /STK=2 /UG=Rn.44423 /LL=25618 /DEF=Rattus norvegicus Acyl-Coenzyme A dehydrogenase, short-branched chain (Acadsb), mRNA. /PROD=acyl-Coenzyme A dehydrogenase, short-branchedchain /FL=gb:U64451.1 gb:NM_013084.1	NM_013084	ENSRNOG00000020624
1369539_PM_at	0.0249735	1.15979	up	St3gal3	ST3 beta-galactoside alpha-2,3-sialyltransferase 3	64445	gb:NM_031697.1 /DB_XREF=gi:13928971 /GEN=Siat6 /FEA=FLmRNA /CNT=2 /TID=Rn.44390.1 /TIER=FL /STK=2 /UG=Rn.44390 /LL=64445 /DEF=Rattus norvegicus sialyltransferase (N-acetyllacosaminide alpha 2,3-sialyltransferase) (Siat6), mRNA. /PROD=sialyltransferase 3 /FL=gb:M97754.1 gb:NM_031697.1	NM_031697	ENSRNOG00000019843
1369558_PM_at	0.0238488	1.1083	down	Inhbc	inhibin beta C	64549	gb:NM_022614.1 /DB_XREF=gi:12018291 /GEN=Inhbc /FEA=FLmRNA /CNT=2 /TID=Rn.48697.1 /TIER=FL /STK=2 /UG=Rn.48697 /LL=64549 /DEF=Rattus norvegicus activininhibin beta C (Inhbc), mRNA. /PROD=activininhibin beta C /FL=gb:NM_022614.1 gb:AF140031.1	NM_022614	ENSRNOG00000007700
1369570_PM_at	0.0474951	1.08885	up	Sult2a2 ///Sult2a1 /// Sult2al1	sulfotransferase family 2A, dehydroepiandrosterone (DHEA)-preferring, member 2 /// sulfotransferase family 2A, dehydroepiandrosterone (DHEA)-preferring-like 1"///"sulfotransferase family 2A, dehydroepiandrosterone (DHEA)-preferring, member 1	24912 /// 361510///24902	gb:NM_133616.1 /DB_XREF=gi:19424333 /GEN=Sult2a1 /FEA=FLmRNA /CNT=2 /TID=Rn.9926.1 /TIER=FL /STK=2 /UG=Rn.9926 /LL=171153 /DEF=Rattus norvegicus sulfotransferase family, cytosolic, 2A, dehydroepiandrosterone (DHEA) -preferring, member 1 (Sult2a1), mRNA. /PROD=sulfotransferase family, cytosolic, 2A,dehydroepiandrosterone (DHEA) -preferring, member 1 /FL=gb:NM_133616.1 gb:J02643.1	NM_133616	---
1369586_PM_at	0.0381272	1.09241	down	Mcpt8	mast cell protease 8	29269	gb:NM_021598.1 /DB_XREF=gi:11068132 /GEN=Mcpt8 /FEA=FLmRNA /CNT=2 /TID=Rn.55163.1 /TIER=FL /STK=2 /UG=Rn.55163 /LL=29269 /DEF=Rattus norvegicus mast cell protease 8 (Mcpt8), mRNA. /PROD=mast cell protease 8 /FL=gb:U67911.1 gb:NM_021598.1	NM_021598	ENSRNOG00000029604
1369605_PM_at	0.0454304	1.08447	up	Hes2	hairy and enhancer of split 2 (Drosophila)	29567	gb:NM_019236.1 /DB_XREF=gi:9506774 /GEN=Hes2 /FEA=FLmRNA /CNT=2 /TID=Rn.44655.1 /TIER=FL /STK=2 /UG=Rn.44655 /LL=29567 /DEF=Rattus norvegicus hairy and enhancer of split 2 (Drosophila) (Hes2), mRNA. /PROD=hairy and enhancer of split 2 (Drosophila) /FL=gb:NM_019236.1 gb:D14029.1	NM_019236	ENSRNOG00000010490
1369625_PM_at	0.033527	1.2302	up	Aqp1	aquaporin 1	25240	gb:AA891661 /DB_XREF=gi:3018540 /DB_XREF=EST195464 /CLONE=RKIAF23 /FEA=FLmRNA /CNT=40 /TID=Rn.1618.1 /TIER=Stack /STK=6 /UG=Rn.1618 /LL=25240 /UG_GENE=Aqp1 /UG_TITLE=Aquaporin 1 (aquaporin channel forming integral protein 28 (CHIP)) /FL=gb:L07268.1 gb:NM_012778.1	AA891661	ENSRNOG00000011648
1369629_PM_at	0.0251478	1.1841	down	Adk	adenosine kinase	25368	gb:U90340.1 /DB_XREF=gi:1906012 /FEA=FLmRNA /CNT=37 /TID=Rn.3329.1 /TIER=FL /STK=1 /UG=Rn.3329 /LL=25368 /UG_GENE=Adk /DEF=Rattus norvegicus adenosine kinase mRNA, complete cds. /PROD=adenosine kinase /FL=gb:U57042.1 gb:NM_012895.1 gb:U90340.1	U90340	ENSRNOG00000012325
1369630_PM_at	0.00252784	1.10348	down	Adk	adenosine kinase	25368	gb:BF283118 /DB_XREF=gi:11214188 /DB_XREF=EST447709 /CLONE=RGIDX75 /FEA=FLmRNA /CNT=37 /TID=Rn.3329.1 /TIER=Stack /STK=12 /UG=Rn.3329 /LL=25368 /UG_GENE=Adk /UG_TITLE=Adenosin kinase /FL=gb:U57042.1 gb:NM_012895.1 gb:U90340.1	BF283118	ENSRNOG00000012325
1369637_PM_at	0.0100155	1.19825	up	Kif3c	kinesin family member 3C	85248	gb:NM_053486.1 /DB_XREF=gi:16758243 /GEN=Kif3c /FEA=FLmRNA /CNT=16 /TID=Rn.10894.1 /TIER=FL+Stack /STK=10 /UG=Rn.10894 /LL=85248 /DEF=Rattus norvegicus kinesin family member 3C (Kif3c), mRNA. /PROD=kinesin family member 3C /FL=gb:NM_053486.1 gb:AF083330.1 gb:AJ223599.1	NM_053486	ENSRNOG00000011394
1369649_PM_at	0.0181528	1.20986	up	Cacna2d1	calcium channel, voltage-dependent, alpha2/delta subunit 1	25399	gb:AF400662.1 /DB_XREF=gi:17864879 /FEA=FLmRNA /CNT=18 /TID=Rn.11276.1 /TIER=FL /STK=1 /UG=Rn.11276 /LL=25399 /UG_GENE=Cacna2d1 /DEF=Rattus norvegicus L-type calcium channel alpha2delta subunit mRNA, complete cds. /PROD=L-type calcium channel alpha2delta subunit /FL=gb:NM_012919.1 gb:M86621.1 gb:AF400662.1 gb:AF286488.1	AF400662	ENSRNOG00000033531
1369662_PM_at	0.00102442	1.19529	up	Scn2a1	sodium channel, voltage-gated, type II, alpha 1	24766	gb:NM_012647.1 /DB_XREF=gi:6981505 /GEN=Scn2a1 /FEA=FLmRNA /CNT=10 /TID=Rn.10136.1 /TIER=FL /STK=1 /UG=Rn.10136 /LL=24766 /DEF=Rattus norvegicus Sodium channel, voltage-gated, type II, alpha polypeptide (Scn2a1), mRNA. /PROD=sodium channel, voltage-gated, type II, alphapolypeptide /FL=gb:NM_012647.1	NM_012647	ENSRNOG00000005018
1369664_PM_at	0.0258362	1.11701	up	Avpr1a	arginine vasopressin receptor 1A	25107	gb:NM_053019.1 /DB_XREF=gi:16554454 /GEN=Avpr1a /FEA=FLmRNA /CNT=9 /TID=Rn.32282.1 /TIER=FL /STK=1 /UG=Rn.32282 /LL=25107 /DEF=Rattus norvegicus Vasopressin receptor V1a (Avpr1a), mRNA. /PROD=vasopressin receptor V1a /FL=gb:NM_053019.1	NM_053019	ENSRNOG00000004400
1369678_PM_a_at	0.0244261	1.27094	up	Nfia	nuclear factor I/A	25492	gb:D78017.1 /DB_XREF=gi:1041031 /GEN=NFI-A /FEA=FLmRNA /CNT=7 /TID=Rn.10550.1 /TIER=FL /STK=1 /UG=Rn.10550 /LL=25492 /DEF=Rat mRNA for NFI-A1, complete cds. /PROD=NFI-A1 /FL=gb:NM_012988.1 gb:AB060652.1 gb:D78017.1	D78017	ENSRNOG00000006966
1369679_PM_a_at	0.0168679	1.31714	up	Nfia	nuclear factor I/A	25492	gb:AB060652.1 /DB_XREF=gi:13785513 /GEN=NF1-A1 /FEA=FLmRNA /CNT=7 /TID=Rn.10550.1 /TIER=FL /STK=1 /UG=Rn.10550 /LL=25492 /DEF=Rattus norvegicus mRNA for transcription factor NF1-A1, complete cds. /PROD=transcription factor NF1-A1 /FL=gb:NM_012988.1 gb:AB060652.1 gb:D78017.1	AB060652	ENSRNOG00000006966
1369686_PM_at	0.0452256	1.13747	up	Dclk1	doublecortin-like kinase 1	83825	gb:U78857.1 /DB_XREF=gi:2062398 /GEN=cpg16 /FEA=FLmRNA /CNT=10 /TID=Rn.80575.1 /TIER=FL /STK=1 /UG=Rn.80575 /LL=83825 /DEF=Rattus norvegicus protein serinethreonine kinase CPG16 (cpg16) mRNA, complete cds. /PROD=protein serinethreonine kinase CPG16 /FL=gb:U78857.1 gb:NM_053343.1	U78857	---
1369710_PM_a_at	0.0287722	1.07775	down	Snap91	synaptosomal-associated protein 91	65178	gb:NM_031728.1 /DB_XREF=gi:13994176 /GEN=Snap91 /FEA=FLmRNA /CNT=5 /TID=Rn.11022.1 /TIER=FL /STK=1 /UG=Rn.11022 /LL=65178 /DEF=Rattus norvegicus synaptosomal-associated protein, 91 kDa (Snap91), mRNA. /PROD=synaptosomal-associated protein, 91 kDa /FL=gb:NM_031728.1	NM_031728	---
1369742_PM_at	0.0197289	1.30915	up	Herc1	hect (homologous to the E6-AP (UBE3A) carboxyl terminus) domain and RCC1 (CHC1)-like domain (RLD) 1	315771	gb:NM_031610.1 /DB_XREF=gi:13928833 /GEN=Kcnj3 /FEA=FLmRNA /CNT=7 /TID=Rn.9809.1 /TIER=FL /STK=1 /UG=Rn.9809 /LL=50599 /DEF=Rattus norvegicus Potassium channel, inwarding rectifying, subfamily J, member 3 (Kcnj3), mRNA. /PROD=potassium inwardly-rectifying channel, subfamilyJ, member 3 /FL=gb:U01071.1 gb:U09243.1 gb:U01141.1 gb:NM_031610.1 gb:L25264.1	NM_031610	ENSRNOG00000017592
1369748_PM_at	0.0463	1.09296	down	Serpini2	serine (or cysteine) peptidase inhibitor, clade I, member 2	171149	gb:NM_133612.1 /DB_XREF=gi:19424327 /GEN=Serpini2 /FEA=FLmRNA /CNT=5 /TID=Rn.54500.1 /TIER=FL /STK=1 /UG=Rn.54500 /LL=171149 /DEF=Rattus norvegicus serine (or cysteine) proteinase inhibitor, clade I (neuroserpin), member 2 (Serpini2), mRNA. /PROD=serine (or cysteine) proteinase inhibitor, cladeI (neuroserpin), member 2 /FL=gb:NM_133612.1	NM_133612	ENSRNOG00000009903
1369763_PM_at	0.0252868	1.14365	down	Grk4	G protein-coupled receptor kinase 4	59077	gb:NM_022928.1 /DB_XREF=gi:12621083 /GEN=Gprk2l /FEA=FLmRNA /CNT=4 /TID=Rn.54517.1 /TIER=FL /STK=1 /UG=Rn.54517 /LL=59077 /DEF=Rattus norvegicus G protein-coupled receptor kinase 2, groucho gene related (Drosophila) (Gprk2l), mRNA. /PROD=G protein-coupled receptor kinase 4 /FL=gb:NM_022928.1	NM_022928	ENSRNOG00000011847
1369765_PM_at	0.0381615	1.2088	up	Ascl1	achaete-scute complex homolog 1 (Drosophila)	64186	gb:NM_022384.1 /DB_XREF=gi:11693147 /GEN=Ascl1 /FEA=FLmRNA /CNT=4 /TID=Rn.32936.1 /TIER=FL /STK=1 /UG=Rn.32936 /LL=64186 /DEF=Rattus norvegicus achaete-scute complex (Drosophila) homolog-like 1 (Ascl1), mRNA. /PROD=achaete-scute complex (Drosophila) homolog-like1 /FL=gb:NM_022384.1	NM_022384	ENSRNOG00000004294
1369766_PM_at	0.0179754	1.10426	down	Ptger2	prostaglandin E receptor 2, subtype EP2	81752	gb:U48858.1 /DB_XREF=gi:1236076 /FEA=FLmRNA /CNT=4 /TID=Rn.10264.1 /TIER=FL /STK=1 /UG=Rn.10264 /LL=81752 /UG_GENE=Ptger2 /DEF=Rattus norvegicus prostaglandin E receptor EP2 subtype mRNA, complete cds. /PROD=prostaglandin E receptor EP2 subtype /FL=gb:U48858.1 gb:U94708.1 gb:NM_031088.1	U48858	ENSRNOG00000029502 /// ENSRNOG00000034156
1369770_PM_at	0.0127132	1.18714	up	Sstr1	somatostatin receptor 1	25033	gb:NM_012719.1 /DB_XREF=gi:6981583 /GEN=Sstr1 /FEA=FLmRNA /CNT=5 /TID=Rn.42915.1 /TIER=FL /STK=1 /UG=Rn.42915 /LL=25033 /DEF=Rattus norvegicus Somatostatin receptor subtype 1 (Sstr1), mRNA. /PROD=somatostatin receptor subtype 1 /FL=gb:NM_012719.1 gb:M97656.1	NM_012719	---
1369771_PM_at	0.0146352	1.11998	down	Irs1	insulin receptor substrate 1	25467	gb:NM_012969.1 /DB_XREF=gi:6981105 /GEN=Irs1 /FEA=FLmRNA /CNT=4 /TID=Rn.10476.1 /TIER=FL /STK=1 /UG=Rn.10476 /LL=25467 /DEF=Rattus norvegicus Insulin receptor substrate 1 (Irs1), mRNA. /PROD=insulin receptor substrate 1 /FL=gb:NM_012969.1	NM_012969	---
1369783_PM_a_at	0.0438071	1.12961	up	Nrg1	neuregulin 1	112400	gb:U02319.1 /DB_XREF=gi:408388 /FEA=FLmRNA /CNT=2 /TID=Rn.37438.2 /TIER=FL /STK=1 /UG=Rn.37438 /LL=112400 /UG_GENE=Nrg1 /DEF=Rattus norvegicus clone ndf38 neu differentiation factor mRNA, complete cds. /PROD=neu differentiation factor /FL=gb:U02319.1 gb:U02323.1	U02319	ENSRNOG00000010392
1369791_PM_at	0.0324339	1.09807	down	Clcn4-2	chloride channel 4-2	60586	gb:NM_022198.1 /DB_XREF=gi:11559969 /GEN=LOC60586 /FEA=FLmRNA /CNT=3 /TID=Rn.44406.1 /TIER=FL /STK=1 /UG=Rn.44406 /LL=60586 /DEF=Rattus norvegicus putative chloride channel (similar to Mm Clcn4-2) (LOC60586), mRNA. /PROD=putative chloride channel (similar to MmClcn4-2) /FL=gb:NM_022198.1	NM_022198	ENSRNOG00000003533
1369816_PM_at	0.0144281	1.27052	up	Rab3a	RAB3A, member RAS oncogene family	25531	gb:NM_013018.1 /DB_XREF=gi:6981451 /GEN=Rab3a /FEA=FLmRNA /CNT=3 /TID=Rn.44409.1 /TIER=FL /STK=1 /UG=Rn.44409 /LL=25531 /DEF=Rattus norvegicus Ras-related small GTP binding protein 3A (Rab3a), mRNA. /PROD=ras-related small GTP binding protein 3A /FL=gb:NM_013018.1	NM_013018	ENSRNOG00000019433
1369835_PM_at	0.0314685	1.06305	down	Omp	olfactory marker protein	24612	gb:NM_012616.1 /DB_XREF=gi:6981303 /GEN=Omp /FEA=FLmRNA /CNT=2 /TID=Rn.9720.1 /TIER=ConsEnd /STK=0 /UG=Rn.9720 /LL=24612 /DEF=Rattus norvegicus Olfactory marker protein (Omp), mRNA. /PROD=olfactory marker protein /FL=gb:NM_012616.1	NM_012616	---
1369864_PM_a_at	0.0263992	1.17154	down	Sds	serine dehydratase	25044	gb:NM_053962.1 /DB_XREF=gi:16758849 /GEN=Sds /FEA=FLmRNA /CNT=2 /TID=Rn.9918.1 /TIER=FL /STK=1 /UG=Rn.9918 /LL=117032 /DEF=Rattus norvegicus serine dehydratase (Sds), mRNA. /PROD=serine dehydratase /FL=gb:NM_053962.1	NM_053962	ENSRNOG00000001388
1369867_PM_at	0.0211465	1.22213	up	St8sia1	ST8 alpha-N-acetyl-neuraminide alpha-2,8-sialyltransferase 1	25280	gb:U53883.1 /DB_XREF=gi:3342208 /FEA=FLmRNA /CNT=2 /TID=Rn.10603.1 /TIER=FL /STK=1 /UG=Rn.10603 /LL=25280 /UG_GENE=Siat8a /DEF=Rattus norvegicus alpha 2,8-sialyltransferase mRNA, complete cds. /PROD=alpha 2,8-sialyltransferase /FL=gb:NM_012813.1 gb:U53883.1	U53883	ENSRNOG00000014018
1369888_PM_at	0.0274705	1.16377	down	Gcg	glucagon	24952	gb:NM_012707.1 /DB_XREF=gi:6978881 /GEN=Gcg /FEA=FLmRNA /CNT=2 /TID=Rn.54383.1 /TIER=FL /STK=1 /UG=Rn.54383 /LL=24952 /DEF=Rattus norvegicus Glucagon (Gcg), mRNA. /PROD=glucagon /FL=gb:NM_012707.1	NM_012707	ENSRNOG00000005498
1369895_PM_s_at	0.0460361	1.09064	down	Podxl	podocalyxin-like	192181	gb:AF109393.1 /DB_XREF=gi:6492251 /FEA=FLmRNA /CNT=12 /TID=Rn.13805.1 /TIER=FL+Stack /STK=7 /UG=Rn.13805 /DEF=Rattus norvegicus podocalyxin mRNA, complete cds. /PROD=podocalyxin /FL=gb:AF109393.1 gb:AB020726.1	AF109393	ENSRNOG00000012495
1369905_PM_at	0.0246325	1.14436	up	Gabra4	gamma-aminobutyric acid (GABA) A receptor, alpha 4	140675	gb:NM_080587.1 /DB_XREF=gi:18034794 /GEN=Gabra4 /FEA=FLmRNA /CNT=1 /TID=Rn.81205.1 /TIER=FL /STK=1 /UG=Rn.81205 /DEF=Rattus norvegicus gamma-aminobutyric acid (GABA-A) receptor, subunit alpha 4 (Gabra4), mRNA. /PROD=gamma-aminobutyric acid (GABA-A) receptor,subunit alpha 4 /FL=gb:NM_080587.1	NM_080587	ENSRNOG00000002336
1369928_PM_at	0.0294545	1.15682	up	Acta1	actin, alpha 1, skeletal muscle	29437	gb:NM_019212.1 /DB_XREF=gi:9506370 /GEN=Acta1 /FEA=FLmRNA /CNT=54 /TID=Rn.39438.1 /TIER=FL+Stack /STK=46 /UG=Rn.39438 /LL=29437 /DEF=Rattus norvegicus actin, alpha 1, skeletal muscle (Acta1), mRNA. /PROD=actin, alpha 1, skeletal muscle /FL=gb:NM_019212.1	NM_019212	ENSRNOG00000017786
1369930_PM_at	0.0161377	1.06021	down	Psma6	proteasome (prosome, macropain) subunit, alpha type 6	29673	gb:NM_017283.1 /DB_XREF=gi:8394075 /GEN=Psma6 /FEA=FLmRNA /CNT=60 /TID=Rn.2935.1 /TIER=FL+Stack /STK=40 /UG=Rn.2935 /LL=29673 /DEF=Rattus norvegicus proteasome (prosome, macropain) subunit, alpha type 6 (Psma6), mRNA. /PROD=proteasome (prosome, macropain) subunit, alphatype 6 /FL=gb:NM_017283.1	NM_017283	ENSRNOG00000007114
1369939_PM_at	0.016992	1.0687	down	Cycs	cytochrome c, somatic	25309	gb:AI104240 /DB_XREF=gi:3708632 /DB_XREF=EST213529 /CLONE=RHEBZ22 /FEA=FLmRNA /CNT=112 /TID=Rn.2202.1 /TIER=Stack /STK=15 /UG=Rn.2202 /LL=25309 /UG_GENE=Cycs /UG_TITLE=Cytochrome C, expressed in somatic tissues /FL=gb:NM_012839.1	AI104240	ENSRNOG00000010452
1369957_PM_at	0.0338063	1.16377	down	Rgs5	regulator of G-protein signaling 5	54294	gb:NM_019341.1 /DB_XREF=gi:9507044 /GEN=Rgs5 /FEA=FLmRNA /CNT=22 /TID=Rn.1150.1 /TIER=FL+Stack /STK=16 /UG=Rn.1150 /LL=54294 /DEF=Rattus norvegicus regulator of G-protein signaling 5 (Rgs5), mRNA. /PROD=regulator of G-protein signaling 5 /FL=gb:NM_019341.1 gb:AF241259.1	NM_019341	---
1369969_PM_at	0.0207438	1.09198	down	Parp1	poly (ADP-ribose) polymerase 1	25591	gb:NM_013063.1 /DB_XREF=gi:6978454 /GEN=Adprt /FEA=FLmRNA /CNT=26 /TID=Rn.11327.1 /TIER=FL+Stack /STK=13 /UG=Rn.11327 /LL=25591 /DEF=Rattus norvegicus ADP-ribosyltransferase (NAD+; poly (ADP-ribose) polymerase) (Adprt), mRNA. /PROD=ADP-ribosyltransferase (NAD+; poly (ADP-ribose)polymerase) /FL=gb:U94340.1 gb:NM_013063.1	NM_013063	ENSRNOG00000003084
1369975_PM_at	0.00439597	1.1943	down	Secp43	tRNA selenocysteine associated protein	65241	gb:NM_023027.1 /DB_XREF=gi:12711699 /GEN=Secp43 /FEA=FLmRNA /CNT=18 /TID=Rn.20160.1 /TIER=FL+Stack /STK=13 /UG=Rn.20160 /LL=65241 /DEF=Rattus norvegicus tRNA selenocysteine associated protein (Secp43), mRNA. /PROD=tRNA selenocysteine associated protein /FL=gb:NM_023027.1 gb:AF181856.1	NM_023027	---
1369978_PM_at	0.000710479	1.1184	down	Prpsap2	phosphoribosyl pyrophosphate synthetase-associated protein 2	117272	gb:NM_057131.1 /DB_XREF=gi:16923983 /GEN=Prpsap2 /FEA=FLmRNA /CNT=23 /TID=Rn.2681.1 /TIER=FL+Stack /STK=12 /UG=Rn.2681 /LL=117272 /DEF=Rattus norvegicus phosphoribosyl pyrophosphate synthetase-associated protein 2 (Prpsap2), mRNA. /PROD=phosphoribosyl pyrophosphatesynthetase-associated protein 2 /FL=gb:D84434.1 gb:NM_057131.1	NM_057131	ENSRNOG00000002724
1369979_PM_at	0.0159916	1.17692	down	Skap2	src kinase associated phosphoprotein 2	155183	gb:NM_130413.1 /DB_XREF=gi:18426837 /GEN=Scap2 /FEA=FLmRNA /CNT=23 /TID=Rn.17562.1 /TIER=FL+Stack /STK=12 /UG=Rn.17562 /DEF=Rattus norvegicus src family associated phosphoprotein 2 (Scap2), mRNA. /PROD=src family associated phosphoprotein 2 /FL=gb:AF302132.1 gb:NM_130413.1	NM_130413	ENSRNOG00000012228
1369990_PM_at	0.0219363	1.11655	down	Ptpmt1	protein tyrosine phosphatase, mitochondrial 1	29390	gb:NM_022183.1 /DB_XREF=gi:11559944 /GEN=Top2a /FEA=FLmRNA /CNT=40 /TID=Rn.55119.1 /TIER=FL+Stack /STK=11 /UG=Rn.55119 /LL=29390 /DEF=Rattus norvegicus topoisomerase (DNA) II alpha (Top2a), mRNA. /PROD=topoisomerase (DNA) II alpha /FL=gb:NM_022183.1	NM_022183	---
1370016_PM_at	0.0330974	1.11712	up	Nell2	NEL-like 2 (chicken)	81734	gb:NM_031070.1 /DB_XREF=gi:13592012 /GEN=Nell2 /FEA=FLmRNA /CNT=19 /TID=Rn.11567.1 /TIER=FL+Stack /STK=10 /UG=Rn.11567 /LL=81734 /DEF=Rattus norvegicus protein kinase C-binding protein NELL2 (Nell2), mRNA. /PROD=protein kinase C-binding protein NELL2 /FL=gb:AY089719.1 gb:NM_031070.1 gb:U48245.1	NM_031070	ENSRNOG00000006235
1370021_PM_at	0.0356225	1.16369	down	Rho	rhodopsin	24717	gb:NM_033441.1 /DB_XREF=gi:15559212 /GEN=Rho /FEA=FLmRNA /CNT=23 /TID=Rn.10560.1 /TIER=FL+Stack /STK=9 /UG=Rn.10560 /LL=24717 /DEF=Rattus norvegicus Rhodopsin (retinitis pigmentosa 4, autosomal dominant) (Rho), mRNA. /PROD=rhodopsin (retinitis pigmentosa 4, autosomaldominant) /FL=gb:NM_033441.1	NM_033441	ENSRNOG00000011144
1370052_PM_at	0.00598606	1.20769	up	Pdpk1	3-phosphoinositide dependent protein kinase-1	81745	gb:NM_031081.1 /DB_XREF=gi:13592022 /GEN=Pdpk1 /FEA=FLmRNA /CNT=13 /TID=Rn.10905.1 /TIER=FL+Stack /STK=7 /UG=Rn.10905 /LL=81745 /DEF=Rattus norvegicus 3-phosphoinositide dependent protein kinase-1 (Pdpk1), mRNA. /PROD=3-phosphoinositide dependent protein kinase-1 /FL=gb:NM_031081.1	NM_031081	ENSRNOG00000006136
1370053_PM_at	0.0345932	1.12016	up	Dlgap1	Discs, large (Drosophila) homolog-associated protein 1	65040	gb:BE116953 /DB_XREF=gi:8509023 /DB_XREF=UI-R-BS1-azg-g-04-0-UI.s1 /CLONE=UI-R-BS1-azg-g-04-0-UI /FEA=FLmRNA /CNT=15 /TID=Rn.37481.1 /TIER=ConsEnd /STK=2 /UG=Rn.37481 /LL=65040 /UG_GENE=Dlgap1 /UG_TITLE=guanylate kinase associated protein /FL=gb:U67137.1 gb:NM_022946.2	BE116953	---
1370062_PM_at	0.0122629	1.10638	down	Higd1a	HIG1 hypoxia inducible domain family, member 1A	140937	gb:NM_080902.1 /DB_XREF=gi:18266711 /GEN=Hig1 /FEA=FLmRNA /CNT=15 /TID=Rn.2084.1 /TIER=FL+Stack /STK=6 /UG=Rn.2084 /DEF=Rattus norvegicus hypoxia induced gene 1 (Hig1), mRNA. /PROD=hypoxia induced gene 1 /FL=gb:AY062253.1 gb:NM_080902.1	NM_080902	ENSRNOG00000019428
1370075_PM_at	0.000654746	1.14126	down	Dhfr	dihydrofolate reductase	24312	gb:NM_130400.1 /DB_XREF=gi:18426813 /GEN=Dhfr1 /FEA=FLmRNA /CNT=14 /TID=Rn.15056.1 /TIER=FL+Stack /STK=6 /UG=Rn.15056 /DEF=Rattus norvegicus Dihydrofolate reductase 1 (active) (Dhfr1), mRNA. /PROD=dihydrofolate reductase 1 (active) /FL=gb:NM_130400.1 gb:AF318150.1	NM_130400	---
1370092_PM_at	0.0259095	1.10806	down	Mas1	MAS1 oncogene	25153	gb:NM_012757.1 /DB_XREF=gi:6981185 /GEN=Mas1 /FEA=FLmRNA /CNT=4 /TID=Rn.21943.1 /TIER=FL /STK=2 /UG=Rn.21943 /LL=25153 /DEF=Rattus norvegicus MAS1 oncogene (Mas1), mRNA. /PROD=MAS1 oncogene /FL=gb:NM_012757.1	NM_012757	ENSRNOG00000014971
1370094_PM_at	0.0123389	1.09544	down	Acrv1	acrosomal vesicle protein 1	60353	gb:NM_021747.1 /DB_XREF=gi:11120693 /GEN=Sp10 /FEA=FLmRNA /CNT=4 /TID=Rn.42946.1 /TIER=FL /STK=2 /UG=Rn.42946 /LL=60353 /DEF=Rattus norvegicus sperm protein 10 (Sp10), mRNA. /PROD=sperm protein 10 /FL=gb:NM_021747.1	NM_021747	ENSRNOG00000008508
1370099_PM_at	0.0499304	1.25691	up	Fbxl20	F-box and leucine-rich repeat protein 20	64039	gb:NM_022272.1 /DB_XREF=gi:11560092 /GEN=Fbxl2 /FEA=FLmRNA /CNT=9 /TID=Rn.18281.1 /TIER=FL /STK=1 /UG=Rn.18281 /LL=64039 /DEF=Rattus norvegicus F-box protein FBL2 (Fbxl2), mRNA. /PROD=F-box protein FBL2 /FL=gb:AF182443.1 gb:NM_022272.1	NM_022272	ENSRNOG00000005081
1370108_PM_a_at	0.0275282	1.22351	up	Lin7a	lin-7 homolog a (C. elegans)	85327	gb:AF090134.1 /DB_XREF=gi:3885829 /FEA=FLmRNA /CNT=1 /TID=Rn.31766.2 /TIER=FL /STK=1 /UG=Rn.31766 /LL=85327 /UG_GENE=Veli1 /DEF=Rattus norvegicus lin-7-Ba mRNA, complete cds. /PROD=lin-7-Ba /FL=gb:AF090134.1	AF090134	ENSRNOG00000004527
1370113_PM_at	0.000733288	1.20888	down	Birc3	baculoviral IAP repeat-containing 3	78971	gb:NM_023987.1 /DB_XREF=gi:13027445 /GEN=Birc2 /FEA=FLmRNA /CNT=4 /TID=Rn.64578.1 /TIER=FL /STK=1 /UG=Rn.64578 /LL=78971 /DEF=Rattus norvegicus inhibitor of apoptosis protein 1 (Birc2), mRNA. /PROD=inhibitor of apoptosis protein 1 /FL=gb:NM_023987.1 gb:AF183430.1	NM_023987	ENSRNOG00000005731
1370121_PM_at	0.0243638	1.33325	up	Add1	adducin 1 (alpha)	24170	gb:NM_016990.1 /DB_XREF=gi:8850210 /GEN=Add1 /FEA=FLmRNA /CNT=10 /TID=Rn.5788.1 /TIER=FL /STK=0 /UG=Rn.5788 /LL=24170 /DEF=Rattus norvegicus Adducin 1, alpha (Add1), mRNA. /PROD=adducin 1, alpha /FL=gb:NM_016990.1	NM_016990	ENSRNOG00000013039
1370125_PM_at	0.00738526	1.26052	down	Hapln1	hyaluronan and proteoglycan link protein 1	29331	gb:NM_019189.1 /DB_XREF=gi:9506518 /GEN=Crtl1 /FEA=FLmRNA /CNT=7 /TID=Rn.49048.1 /TIER=FL /STK=0 /UG=Rn.49048 /LL=29331 /DEF=Rattus norvegicus cartilage link protein 1 (Crtl1), mRNA. /PROD=cartilage link protein 1 /FL=gb:NM_019189.1	NM_019189	---
1370149_PM_at	0.0328306	1.11126	down	Asgr1	asialoglycoprotein receptor 1	24210	gb:NM_012503.1 /DB_XREF=gi:7705289 /GEN=Asgr1 /FEA=FLmRNA /CNT=3 /TID=Rn.44300.1 /TIER=FL /STK=0 /UG=Rn.44300 /LL=24210 /DEF=Rattus norvegicus Asialoglycoprotein receptor 1 (hepatic lectin) (Asgr1), mRNA. /PROD=asialoglycoprotein receptor 1 (hepatic lectin) /FL=gb:NM_012503.1	NM_012503	ENSRNOG00000018693
1370180_PM_at	0.0337073	1.05083	up	Nudt4	nudix (nucleoside diphosphate linked moiety X)-type motif 4	94267	gb:AA891213 /DB_XREF=gi:3018092 /DB_XREF=EST195016 /CLONE=RHEAQ58 /FEA=FLmRNA /CNT=67 /TID=Rn.8426.1 /TIER=Stack /STK=8 /UG=Rn.8426 /LL=94267 /UG_GENE=Nudt4 /UG_TITLE=diphosphoinositol polyphosphate phosphohydolase type II /FL=gb:NM_053598.1 gb:AF253473.1	AA891213	ENSRNOG00000009094
1370192_PM_at	0.0263395	1.0873	up	Stx12	syntaxin 12	65033	gb:BF283010 /DB_XREF=gi:11214080 /DB_XREF=EST447601 /CLONE=RGIDW26 /FEA=FLmRNA /CNT=32 /TID=Rn.54570.1 /TIER=Stack /STK=7 /UG=Rn.54570 /LL=65033 /UG_GENE=Stx12 /UG_TITLE=syntaxin 12 /FL=gb:AF044581.1 gb:NM_022939.1 gb:AF035632.1	BF283010	ENSRNOG00000011804
1370202_PM_at	0.0443114	1.23039	down	Pla2g16	phospholipase A2, group XVI	24913	gb:BG378637 /DB_XREF=gi:13303109 /DB_XREF=UI-R-CV1-bvr-g-10-0-UI.s1 /CLONE=UI-R-CV1-bvr-g-10-0-UI /FEA=FLmRNA /CNT=14 /TID=Rn.11377.1 /TIER=Stack /STK=6 /UG=Rn.11377 /LL=24913 /UG_GENE=Hrev107 /UG_TITLE=Hras-revertant gene 107 /FL=gb:NM_017060.1	BG378637	ENSRNOG00000021206
1370208_PM_at	0.0452546	1.20444	up	Nr1h2	nuclear receptor subfamily 1, group H, member 2	58851	gb:AI169222 /DB_XREF=gi:3705530 /DB_XREF=EST215057 /CLONE=RKIBP01 /FEA=FLmRNA /CNT=51 /TID=Rn.786.1 /TIER=Stack /STK=32 /UG=Rn.786 /LL=58851 /UG_GENE=Nr1h2 /UG_TITLE=nuclear receptor subfamily 1, group H, member 2 /FL=gb:U20389.1 gb:U14533.1 gb:NM_031626.1	AI169222	ENSRNOG00000019812
1370216_PM_at	0.0284474	1.30886	up	Ddr1	discoidin domain receptor tyrosine kinase 1	25678	gb:BE112590 /DB_XREF=gi:8504695 /DB_XREF=UI-R-BJ1-avn-d-10-0-UI.s1 /CLONE=UI-R-BJ1-avn-d-10-0-UI /FEA=FLmRNA /CNT=17 /TID=Rn.7807.1 /TIER=Stack /STK=12 /UG=Rn.7807 /LL=25678 /UG_GENE=Ddr1 /UG_TITLE=Discoidin domain receptor (neurotrophic tyrosine kinase, receptor, type 4 (cell adhesion kinase)) /FL=gb:NM_013137.1	BE112590	ENSRNOG00000000830
1370220_PM_at	0.0456243	1.09955	up	Scpep1	serine carboxypeptidase 1	114861	gb:BI283159 /DB_XREF=gi:14934628 /DB_XREF=UI-R-CU0s-cca-g-06-0-UI.s1 /CLONE=UI-R-CU0s-cca-g-06-0-UI /FEA=FLmRNA /CNT=24 /TID=Rn.2108.1 /TIER=Stack /STK=11 /UG=Rn.2108 /UG_TITLE=Rattus norvegicus retinoid-inducible serine carboxypeptidase precursor (Risc) mRNA, complete cds /FL=gb:NM_133383.1 gb:AF330051.1	BI283159	ENSRNOG00000002358
1370224_PM_at	0.00625701	1.24921	up	Stat3	signal transducer and activator of transcription 3	25125	gb:BE113920 /DB_XREF=gi:8506025 /DB_XREF=UI-R-BJ1-awi-a-05-0-UI.s1 /CLONE=UI-R-BJ1-awi-a-05-0-UI /FEA=FLmRNA /CNT=19 /TID=Rn.10247.1 /TIER=Stack /STK=10 /UG=Rn.10247 /LL=25125 /UG_GENE=Stat3 /UG_TITLE=Signal transducer and activator of transcription 3 /FL=gb:NM_012747.1	BE113920	ENSRNOG00000019742
1370235_PM_at	0.0236344	1.08741	down	Dbi	diazepam binding inhibitor (GABA receptor modulator, acyl-Coenzyme A binding protein)	25045	gb:AI175009 /DB_XREF=gi:3725647 /DB_XREF=EST218524 /CLONE=RMUCA81 /FEA=FLmRNA /CNT=46 /TID=Rn.3285.1 /TIER=Stack /STK=7 /UG=Rn.3285 /LL=25045 /UG_GENE=Dbi /UG_TITLE=Diazepam binding inhibitor (GABA receptor modulator, acyl-Coenxyme A binding protein) /FL=gb:M20268.1 gb:NM_031853.1	AI175009	---
1370238_PM_at	0.0166854	1.10201	down	Usmg5	up-regulated during skeletal muscle growth 5 homolog (mouse)	171069	gb:AA891707 /DB_XREF=gi:3018586 /DB_XREF=EST195510 /CLONE=RKIAF79 /FEA=FLmRNA /CNT=21 /TID=Rn.4281.1 /TIER=Stack /STK=7 /UG=Rn.4281 /LL=171069 /UG_GENE=LOC171069 /UG_TITLE=dapit /FL=gb:NM_133544.1	AA891707	ENSRNOG00000020296 /// ENSRNOG00000020473
1370244_PM_at	0.0383967	1.16674	down	Ctsl1	cathepsin L1	25697	gb:AI176595 /DB_XREF=gi:3727233 /DB_XREF=EST220183 /CLONE=ROVBU30 /FEA=FLmRNA /CNT=90 /TID=Rn.1294.1 /TIER=Stack /STK=6 /UG=Rn.1294 /LL=25697 /UG_GENE=Ctsl /UG_TITLE=Cathepsin L /FL=gb:NM_013156.1	AI176595	ENSRNOG00000018566
1370245_PM_at	0.00161183	1.15519	down	Ctsl1	cathepsin L1	25697	gb:AI232474 /DB_XREF=gi:3816354 /DB_XREF=EST229162 /CLONE=RKICC11 /FEA=FLmRNA /CNT=90 /TID=Rn.1294.1 /TIER=ConsEnd /STK=2 /UG=Rn.1294 /LL=25697 /UG_GENE=Ctsl /UG_TITLE=Cathepsin L /FL=gb:NM_013156.1	AI232474	ENSRNOG00000018566
1370257_PM_at	0.0236943	1.09733	down	Pla2g1b	phospholipase A2, group IB, pancreas	29526	gb:AI234860 /DB_XREF=gi:3828366 /DB_XREF=EST231422 /CLONE=ROVCI73 /FEA=FLmRNA /CNT=14 /TID=Rn.4283.1 /TIER=Stack /STK=6 /UG=Rn.4283 /LL=29526 /UG_GENE=Pla2g1b /UG_TITLE=phospholipase A2, group IB, pancreas /FL=gb:D00036.1 gb:NM_031585.1	AI234860	ENSRNOG00000001153
1370263_PM_at	0.0454111	1.4709	up	Dll3	delta-like 3 (Drosophila)	114125	gb:BE107343 /DB_XREF=gi:8499448 /DB_XREF=UI-R-BS1-ays-f-07-0-UI.s1 /CLONE=UI-R-BS1-ays-f-07-0-UI /FEA=FLmRNA /CNT=12 /TID=Rn.23105.1 /TIER=Stack /STK=6 /UG=Rn.23105 /LL=114125 /UG_GENE=Dll3 /UG_TITLE=delta (Drosophila)-like 3 /FL=gb:AF084576.1 gb:NM_053666.1	BE107343	ENSRNOG00000019338
1370269_PM_at	0.0449587	1.08686	up	Cyp1a1	cytochrome P450, family 1, subfamily a, polypeptide 1	24296	gb:X00469.1 /DB_XREF=gi:56043 /FEA=FLmRNA /CNT=5 /TID=Rn.10352.1 /TIER=ConsEnd /STK=1 /UG=Rn.10352 /LL=24296 /UG_GENE=Cyp1a1 /UG_TITLE=Cytochrome P450, subfamily I (aromatic compound-inducible), member A1 (C6, form c) /DEF=Rat mRNA for 3-methylcholanthrene-induced rat cytochrome P-450MC. /FL=gb:NM_012540.1	X00469	ENSRNOG00000019500
1370273_PM_at	0.00202485	1.11072	down	LOC360395	hypothetical gene supported by M31032; NM_181440	360395	gb:M58654.1 /DB_XREF=gi:204483 /GEN=GRP-Cb /FEA=FLmRNA /CNT=209 /TID=Rn.10942.2 /TIER=FL+Stack /STK=206 /UG=Rn.10942 /DEF=Rat glutamineglutamic acid-rich protein isoform Cb (GRP-Cb) mRNA, complete cds. /PROD=glutamineglutamic acid-rich protein /FL=gb:M58654.1	M58654	---
1370280_PM_at	0.00406943	1.19056	down	Hprt1	hypoxanthine phosphoribosyltransferase 1	24465	gb:M86443.1 /DB_XREF=gi:204660 /GEN=hypoxanthine-guanine phosporibosyltransferase /FEA=FLmRNA /CNT=51 /TID=Rn.47.1 /TIER=FL+Stack /STK=33 /UG=Rn.47 /LL=24465 /DEF=Rat hypoxanthine-guanine phosporibosyltransferase mRNA, complete cds. /PROD=hypoxanthine-guanine phosporibosyltransferase /FL=gb:M63983.1 gb:M86443.1	M86443	ENSRNOG00000031367
1370304_PM_at	0.00906981	1.10072	down	Timm17a	translocase of inner mitochondrial membrane 17 homolog A (yeast)	54311	gb:AB006450.1 /DB_XREF=gi:2335036 /FEA=FLmRNA /CNT=23 /TID=Rn.22514.1 /TIER=FL+Stack /STK=15 /UG=Rn.22514 /LL=54311 /UG_GENE=Timm17a /DEF=Rattus norvegicus mRNA for Tim17, complete cds. /PROD=Tim17 /FL=gb:AB006450.1	AB006450	ENSRNOG00000007040
1370311_PM_at	0.0301314	1.06638	down	Eif2b1	eukaryotic translation initiation factor 2B, subunit 1 alpha	64514	gb:U05821.1 /DB_XREF=gi:623032 /GEN=eIF-2a /FEA=FLmRNA /CNT=19 /TID=Rn.9181.1 /TIER=FL+Stack /STK=14 /UG=Rn.9181 /LL=64514 /DEF=Rattus norvegicus translation initiation factor eIF-2B alpha-subunit (eIF-2a) mRNA, complete cds. /PROD=translation initiation factor eIF-2Balpha-subunit /FL=gb:U05821.1	U05821	ENSRNOG00000001039
1370312_PM_at	0.0294356	1.06542	up	Spon1	spondin 1, extracellular matrix protein	64456	gb:M88469.1 /DB_XREF=gi:204176 /GEN=f-spondin /FEA=FLmRNA /CNT=20 /TID=Rn.7546.1 /TIER=FL+Stack /STK=14 /UG=Rn.7546 /LL=64456 /DEF=Rattus norvegicus f-spondin mRNA, complete cds. /PROD=f-spondin /FL=gb:M88469.1	M88469	---
1370314_PM_at	0.0319238	1.12775	down	Slc20a1	solute carrier family 20 (phosphate transporter), member 1	81826	gb:AB000489.1 /DB_XREF=gi:9695267 /FEA=FLmRNA /CNT=18 /TID=Rn.8759.1 /TIER=FL+Stack /STK=14 /UG=Rn.8759 /LL=81826 /UG_GENE=Slc20a1 /DEF=Rattus norvegicus mRNA for RPHO-1, complete cds. /PROD=RPHO-1 /FL=gb:AB000489.1	AB000489	ENSRNOG00000018567
1370321_PM_at	0.047047	1.11828	down	Aifm1	apoptosis-inducing factor, mitochondrion-associated 1	83533	gb:AF262320.1 /DB_XREF=gi:14279175 /FEA=FLmRNA /CNT=15 /TID=Rn.8124.1 /TIER=FL+Stack /STK=12 /UG=Rn.8124 /LL=83533 /UG_GENE=Pdcd8 /DEF=Rattus norvegicus apoptosis-inducing factor mRNA, complete cds. /PROD=apoptosis-inducing factor /FL=gb:AF262320.1 gb:AB041723.1	AF262320	ENSRNOG00000006067
1370344_PM_at	0.0220433	1.34094	up	Hspa4	heat shock protein 4	266759	gb:AF077354.1 /DB_XREF=gi:3360520 /GEN=irp94 /FEA=FLmRNA /CNT=20 /TID=Rn.29989.1 /TIER=FL+Stack /STK=9 /UG=Rn.29989 /DEF=Rattus norvegicus ischemia responsive 94 kDa protein (irp94) mRNA, complete cds. /PROD=ischemia responsive 94 kDa protein /FL=gb:AF077354.1	AF077354	ENSRNOG00000016596
1370353_PM_at	0.0481586	1.12841	down	Timm22	translocase of inner mitochondrial membrane 22 homolog (yeast)	79463	gb:AF223951.1 /DB_XREF=gi:6760456 /GEN=Tim22 /FEA=FLmRNA /CNT=20 /TID=Rn.18509.1 /TIER=FL+Stack /STK=8 /UG=Rn.18509 /LL=79463 /DEF=Rattus norvegicus TIM22 preprotein translocase (Tim22) mRNA, complete cds; nuclear gene for mitochondrial product. /PROD=TIM22 preprotein translocase /FL=gb:AF223951.1	AF223951	ENSRNOG00000007988
1370386_PM_at	0.0139307	1.10047	down	Ruvbl1	RuvB-like 1 (E. coli)	65137	gb:AB002406.1 /DB_XREF=gi:2225876 /FEA=FLmRNA /CNT=9 /TID=Rn.37500.2 /TIER=FL+Stack /STK=6 /UG=Rn.37500 /LL=65137 /UG_GENE=Ruvbl1 /DEF=Rattus norvegicus mRNA for TIP49, complete cds. /PROD=TIP49 /FL=gb:AB002406.1 gb:AB001581.1	AB002406	ENSRNOG00000013195
1370391_PM_at	0.0104218	1.07022	down	Crabp2	cellular retinoic acid binding protein 2	29563	gb:U23407.1 /DB_XREF=gi:727432 /GEN=CRABP II /FEA=FLmRNA /CNT=7 /TID=Rn.11333.1 /TIER=FL+Stack /STK=6 /UG=Rn.11333 /LL=29563 /DEF=Rattus norvegicus cellular retinoic acid-binding protein II (CRABP II) mRNA, complete cds. /PROD=cellular retinoic acid-binding protein II /FL=gb:U23407.1	U23407	ENSRNOG00000022101
1370393_PM_at	0.0139504	1.22137	down	Ccdc5	coiled-coil domain containing 5	192228	gb:BF418951 /DB_XREF=gi:11406940 /DB_XREF=UI-R-BJ2-bqk-g-10-0-UI.s1 /CLONE=UI-R-BJ2-bqk-g-10-0-UI /FEA=FLmRNA /CNT=21 /TID=Rn.29736.1 /TIER=Stack /STK=9 /UG=Rn.29736 /UG_TITLE=Rattus norvegicus unknown mRNA, complete cds /FL=gb:AF092207.1	BF418951	ENSRNOG00000017067
1370426_PM_a_at	0.011561	1.12165	up	Atp2a2	ATPase, Ca++ transporting, cardiac muscle, slow twitch 2	29693	gb:AI175492 /DB_XREF=gi:3726130 /DB_XREF=EST219044 /CLONE=RMUCO17 /FEA=FLmRNA /CNT=52 /TID=Rn.2305.3 /TIER=Stack /STK=13 /UG=Rn.2305 /LL=29693 /UG_GENE=Atp2a2 /UG_TITLE=ATPase, Ca++ transporting, cardiac muscle, slow twitch 2 /FL=gb:J04024.1	AI175492	ENSRNOG00000001285
1370432_PM_at	0.00922153	1.22249	up	Pou3f1	POU class 3 homeobox 1	192110	gb:M72711.1 /DB_XREF=gi:206866 /GEN=SCIP /FEA=FLmRNA /CNT=7 /TID=Rn.11354.1 /TIER=FL /STK=3 /UG=Rn.11354 /LL=29588 /UG_TITLE=POU domain, class 3, transcription factor 2 /DEF=Rat transcriptional repressor of myelin-specific genes (SCIP) mRNA, complete cds. /FL=gb:M72711.1	M72711	---
1370440_PM_at	0.0222699	1.1892	up	Slc15a4	solute carrier family 15, member 4	246280	gb:AB000280.1 /DB_XREF=gi:2208838 /GEN=PHT1 /FEA=FLmRNA /CNT=4 /TID=Rn.10770.1 /TIER=FL /STK=3 /UG=Rn.10770 /DEF=Rattus norvegicus mRNA for peptidehistidine transporter, complete cds. /PROD=peptidehistidine transporter /FL=gb:AB000280.1	AB000280	ENSRNOG00000000962
1370454_PM_at	0.0352484	1.21179	up	Homer1	homer homolog 1 (Drosophila)	29546	gb:AB003726.1 /DB_XREF=gi:2516236 /GEN=vesl /FEA=FLmRNA /CNT=4 /TID=Rn.37500.3 /TIER=FL /STK=3 /UG=Rn.37500 /LL=65137 /DEF=Rattus norvegicus mRNA for Vesl, complete cds. /PROD=Vesl /FL=gb:AB003726.1 gb:U92079.1	AB003726	---
1370459_PM_at	0.0175478	1.1033	down	Aard	alanine and arginine rich domain containing protein	246323	gb:AY007690.1 /DB_XREF=gi:15822514 /FEA=FLmRNA /CNT=13 /TID=Rn.38451.1 /TIER=FL /STK=2 /UG=Rn.38451 /DEF=Rattus norvegicus A5D3 protein mRNA, complete cds. /PROD=A5D3 protein /FL=gb:AY007690.1	AY007690	ENSRNOG00000004708
1370460_PM_at	0.0242609	1.13994	down	Usp15	ubiquitin specific peptidase 15	171329	gb:AF106657.1 /DB_XREF=gi:6492121 /GEN=ubp109 /FEA=FLmRNA /CNT=15 /TID=Rn.17325.1 /TIER=FL /STK=2 /UG=Rn.17325 /DEF=Rattus norvegicus deubiquitinating enzyme Ubp109 (ubp109) mRNA, complete cds. /PROD=deubiquitinating enzyme Ubp109 /FL=gb:AF106657.1	AF106657	---
1370462_PM_at	0.00427318	1.15674	down	Hmmr	hyaluronan mediated motility receptor (RHAMM)	25460	gb:AI171185 /DB_XREF=gi:3711225 /DB_XREF=EST217137 /CLONE=RMUBH29 /FEA=FLmRNA /CNT=13 /TID=Rn.64571.1 /TIER=ConsEnd /STK=1 /UG=Rn.64571 /LL=25460 /UG_GENE=Hmmr /UG_TITLE=Hyaluronan mediated motility receptor (RHAMM) /FL=gb:AF133037.1 gb:AF336825.1	AI171185	ENSRNOG00000003202
1370466_PM_at	0.0391358	1.31046	up	Lhx5	LIM homeobox 5	124451	gb:L35572.1 /DB_XREF=gi:531219 /GEN=lim-2 /FEA=FLmRNA /CNT=7 /TID=Rn.54653.1 /TIER=FL /STK=2 /UG=Rn.54653 /UG_TITLE=Rattus norvegicus (clone 1.9kB) lim-2 mRNA, complete cds /DEF=Rattus norvegicus (clone 1.9kB) lim-2 mRNA, complete cds. /FL=gb:L35572.1	L35572	ENSRNOG00000001392
1370478_PM_at	0.0330897	1.13905	down	Myo16	myosin XVI	192253	gb:AY004215.1 /DB_XREF=gi:10863772 /FEA=FLmRNA /CNT=3 /TID=Rn.48756.1 /TIER=FL /STK=2 /UG=Rn.48756 /DEF=Rattus norvegicus myosin heavy chain Myr 8b mRNA, complete cds. /PROD=myosin heavy chain Myr 8b /FL=gb:AY004215.1	AY004215	ENSRNOG00000016483
1370481_PM_at	0.0159426	1.10872	down	Scnn1g	sodium channel, nonvoltage-gated 1 gamma	24768	gb:X77933.1 /DB_XREF=gi:458849 /GEN=rENaC /FEA=FLmRNA /CNT=5 /TID=Rn.10360.1 /TIER=ConsEnd /STK=0 /UG=Rn.10360 /LL=24768 /DEF=R.norvegicus mRNA for sodium channel, gamma subunit. /PROD=epithelial sodium channel, gamma subunit /FL=gb:U37540.1 gb:U37539.1	X77933	ENSRNOG00000017842
1370494_PM_at	0.0313514	1.10868	down	Slc14a2	solute carrier family 14 (urea transporter), member 2	54302	gb:AF031642.1 /DB_XREF=gi:4104092 /GEN=UT4 /FEA=FLmRNA /CNT=2 /TID=Rn.81195.1 /TIER=FL /STK=2 /UG=Rn.81195 /LL=170564 /DEF=Rattus norvegicus kidney urea transporter (UT4) mRNA, complete cds. /PROD=urea transporter UT4 /FL=gb:AF041788.1 gb:AF031642.1	AF031642	---
1370506_PM_at	0.0194607	1.10993	down	Coq7	coenzyme Q7 homolog, ubiquinone (yeast)	25249	gb:U46149.1 /DB_XREF=gi:1932724 /GEN=COQ7 /FEA=FLmRNA /CNT=16 /TID=Rn.6981.1 /TIER=FL /STK=1 /UG=Rn.6981 /LL=25249 /DEF=Rattus norvegicus COQ7 mRNA, complete cds. /PROD=COQ7 /FL=gb:U46149.1	U46149	ENSRNOG00000017012
1370507_PM_at	0.0436937	1.09675	up	Dlgap4	discs, large homolog-associated protein 4 (Drosophila)	286930	gb:U67140.1 /DB_XREF=gi:1864092 /FEA=FLmRNA /CNT=14 /TID=Rn.11279.1 /TIER=FL /STK=1 /UG=Rn.11279 /DEF=Rattus norvegicus PSD-95SAP90-associated protein-4 mRNA, complete cds. /PROD=PSD-95SAP90-associated protein-4 /FL=gb:U67140.1	U67140	ENSRNOG00000020225
1370510_PM_a_at	0.0459664	1.12157	down	Arntl	aryl hydrocarbon receptor nuclear translocator-like	29657	gb:AB012600.1 /DB_XREF=gi:3668182 /GEN=BMAL1b /FEA=FLmRNA /CNT=10 /TID=Rn.14532.1 /TIER=FL /STK=1 /UG=Rn.14532 /LL=29657 /DEF=Rattus norvegicus mRNA for BMAL1b, complete cds. /PROD=BMAL1b /FL=gb:AB012600.1	AB012600	ENSRNOG00000014448
1370517_PM_at	0.0131299	1.24805	up	Nptx1	neuronal pentraxin 1	266777	gb:U18772.1 /DB_XREF=gi:687653 /FEA=FLmRNA /CNT=14 /TID=Rn.54707.1 /TIER=FL /STK=1 /UG=Rn.54707 /DEF=Rattus norvegicus neuronal pentraxin precursor mRNA, complete cds. /PROD=neuronal pentraxin precursor /FL=gb:U18772.1	U18772	ENSRNOG00000003741
1370526_PM_at	0.00891379	1.14311	down	Itgae	integrin, alpha E, epithelial-associated	83577	gb:AF020045.1 /DB_XREF=gi:3236341 /FEA=FLmRNA /CNT=7 /TID=Rn.29975.1 /TIER=FL /STK=1 /UG=Rn.29975 /LL=83577 /UG_GENE=Itgae /DEF=Rattus norvegicus integrin alpha E1 mRNA, complete cds. /PROD=integrin alpha E1 /FL=gb:AF020045.1	AF020045	---
1370528_PM_at	0.00856265	1.1725	down	Csnk1d	casein kinase 1, delta	64462	gb:L07578.1 /DB_XREF=gi:294524 /FEA=FLmRNA /CNT=7 /TID=Rn.8046.1 /TIER=FL /STK=1 /UG=Rn.8046 /LL=64462 /UG_GENE=Csnk1d /DEF=Rat casein kinase I delta mRNA, complete cds. /PROD=casein kinase I delta /FL=gb:L07578.1	L07578	---
1370536_PM_at	0.000589472	1.15849	down	Prmt3	protein arginine methyltransferase 3	89820	gb:AF059530.1 /DB_XREF=gi:3088572 /GEN=PRMT3 /FEA=FLmRNA /CNT=7 /TID=Rn.33389.1 /TIER=FL /STK=1 /UG=Rn.33389 /LL=89820 /DEF=Rattus norvegicus protein arginine N-methyltransferase 3 (PRMT3) mRNA, complete cds. /PROD=protein arginine N-methyltransferase 3 /FL=gb:AF059530.1	AF059530	---
1370541_PM_at	0.0295193	1.15794	down	Nr1d2	nuclear receptor subfamily 1, group D, member 2	259241	gb:U20796.1 /DB_XREF=gi:687734 /FEA=FLmRNA /CNT=9 /TID=Rn.10055.1 /TIER=ConsEnd /STK=1 /UG=Rn.10055 /DEF=Rattus norvegicus nuclear receptor Rev-ErbA-beta mRNA, partial cds. /PROD=Rev-ErbA-beta /FL=gb:U15660.1	U20796	---
1370544_PM_at	0.0366941	1.23699	up	Eml2	echinoderm microtubule associated protein like 2	192360	gb:AF335571.1 /DB_XREF=gi:17016931 /FEA=FLmRNA /CNT=7 /TID=Rn.76362.1 /TIER=FL /STK=1 /UG=Rn.76362 /DEF=Rattus norvegicus microtubule-associated protein EMAP mRNA, complete cds. /PROD=microtubule-associated protein EMAP /FL=gb:AF335571.1	AF335571	ENSRNOG00000030127
1370545_PM_at	0.0371047	1.11659	up	Kcna1	potassium voltage-gated channel, shaker-related subfamily, member 1	24520	gb:M26161.1 /DB_XREF=gi:206490 /GEN=potassium channel /FEA=FLmRNA /CNT=7 /TID=Rn.9769.1 /TIER=FL /STK=1 /UG=Rn.9769 /DEF=Rattus norvegicus potassium channel protein mRNA, complete cds. /PROD=potassium channel protein /FL=gb:M26161.1	M26161	---
1370550_PM_at	0.000434703	1.20666	up	Lsamp	limbic system-associated membrane protein	29561	gb:U31554.1 /DB_XREF=gi:951175 /FEA=FLmRNA /CNT=6 /TID=Rn.10176.1 /TIER=FL /STK=1 /UG=Rn.10176 /LL=29561 /UG_GENE=Lsamp /DEF=Rattus norvegicus limbic system-associated membrane protein mRNA, complete cds. /PROD=limbic system-associated membrane protein /FL=gb:U31554.1	U31554	ENSRNOG00000031852
1370570_PM_at	0.0179431	1.42275	up	Nrp1	neuropilin 1	246331	gb:AF016296.1 /DB_XREF=gi:2367638 /FEA=FLmRNA /CNT=4 /TID=Rn.10815.1 /TIER=FL /STK=1 /UG=Rn.10815 /DEF=Rattus norvegicus neuropilin mRNA, complete cds. /PROD=neuropilin /FL=gb:AF018957.1 gb:AF016296.1	AF016296	ENSRNOG00000010744
1370605_PM_s_at	0.0239825	1.11198	down	Lepr	leptin receptor	24536	gb:U53144.1 /DB_XREF=gi:1395212 /GEN=rOb-R /FEA=FLmRNA /CNT=2 /TID=Rn.9891.2 /TIER=FL /STK=1 /UG=Rn.9891 /LL=24536 /DEF=Rattus norvegicus leptin receptor (rOb-R) mRNA, complete cds. /PROD=leptin receptor /FL=gb:U53144.1	U53144	---
1370635_PM_at	0.0150066	1.16532	up	Defb22	defensin beta 22	171412	gb:AF329091.1 /DB_XREF=gi:13774327 /FEA=FLmRNA /CNT=2 /TID=Rn.67074.1 /TIER=FL /STK=1 /UG=Rn.67074 /LL=171412 /UG_GENE=LOC171412 /DEF=Rattus norvegicus E-3 epididymal fluid protein mRNA, complete cds. /PROD=E-3 epididymal fluid protein /FL=gb:AF329091.1	AF329091	ENSRNOG00000007525
1370638_PM_at	0.0335358	1.20918	up	Ank3	ankyrin 3, epithelial	361833	gb:AF069525.1 /DB_XREF=gi:3202045 /FEA=FLmRNA /CNT=1 /TID=Rn.52763.1 /TIER=FL /STK=1 /UG=Rn.52763 /LL=83682 /UG_GENE=Ank3 /DEF=Rattus norvegicus 190 kDa ankyrin isoform mRNA, complete cds. /PROD=190 kDa ankyrin isoform /FL=gb:AF069525.1	AF069525	---
1370644_PM_at	0.0498441	1.08962	down	Trpv5	transient receptor potential cation channel, subfamily V, member 5	116469	gb:AB032019.1 /DB_XREF=gi:9186903 /GEN=ECaC /FEA=FLmRNA /CNT=1 /TID=Rn.12948.2 /TIER=FL /STK=1 /UG=Rn.12948 /LL=116469 /DEF=Rattus norvegicus ECaC mRNA for epithelial calcium channel, complete cds. /PROD=epithelial calcium channel /FL=gb:AB032019.1	AB032019	---
1370654_PM_at	0.0177928	1.11005	up	Slc6a17	solute carrier family 6 (neurotransmitter transporter), member 17	613226	gb:L06434.1 /DB_XREF=gi:205672 /FEA=FLmRNA /CNT=1 /TID=Affx.1.44 /TIER=FL /STK=1 /NOTE=sequence(s) not in UniGene /DEF=Rattus sp. clone ntt4r neurotransmitter transporter mRNA, complete cds. /PROD=neurotransmitter transporter /FL=gb:L06434.1	L06434	---
1370658_PM_a_at	0.0187413	1.15958	up	St18	suppression of tumorigenicity 18	266680	gb:AF031942.1 /DB_XREF=gi:2914750 /FEA=FLmRNA /CNT=1 /TID=Rn.10662.2 /TIER=FL /STK=1 /UG=Rn.10662 /DEF=Rattus norvegicus neural zinc finger factor 3 mRNA, complete cds. /PROD=neural zinc finger factor 3 /FL=gb:AF031942.1	AF031942	ENSRNOG00000006200
1370693_PM_a_at	0.0322117	1.24656	up	Cnp	2',3'-cyclic nucleotide 3' phosphodiesterase	25275	gb:M18630.1 /DB_XREF=gi:203492 /FEA=FLmRNA /CNT=1 /TID=Rn.31762.2 /TIER=FL /STK=1 /UG=Rn.31762 /LL=25275 /UG_GENE=Cnp /UG_TITLE=2,3- Cyclic nucleotide 3-phosphodiesterase /DEF=Rat CNS 2,3-cyclic nucleotide 3-phosphodiesterase (CNPI) mRNA, complete cds. /FL=gb:M18630.1	M18630	ENSRNOG00000017496
1370724_PM_a_at	0.0402741	1.25817	up	Nfia	nuclear factor I/A	25492	gb:D78019.1 /DB_XREF=gi:1041035 /GEN=NFI-A /FEA=FLmRNA /CNT=1 /TID=Rn.10550.4 /TIER=FL /STK=1 /UG=Rn.10550 /LL=25492 /DEF=Rat mRNA for NFI-A3, complete cds. /PROD=NFI-A3 /FL=gb:D78019.1	D78019	ENSRNOG00000006966
1370730_PM_a_at	0.0309188	1.10288	down	Ghrhr	growth hormone releasing hormone receptor	25321	gb:AF409106.1 /DB_XREF=gi:15426023 /FEA=FLmRNA /CNT=1 /TID=Rn.10936.3 /TIER=FL /STK=1 /UG=Rn.10936 /LL=25321 /UG_GENE=Ghrhr /DEF=Rattus norvegicus putative growth hormone-releasing hormone receptor-related protein precursor, mRNA, complete cds, alternatively spliced. /PROD=putative growth hormone-releasing hormonereceptor-related protein precursor /FL=gb:AF409106.1	AF409106	ENSRNOG00000011808
1370733_PM_at	0.0282334	1.17803	up	Lipogenin	Lipogenin	252964	gb:AY057076.1 /DB_XREF=gi:16508156 /FEA=FLmRNA /CNT=1 /TID=Rn.81081.1 /TIER=FL /STK=1 /UG=Rn.81081 /DEF=Rattus norvegicus lipogenin mRNA, complete cds. /PROD=lipogenin /FL=gb:AY057076.1	AY057076	---
1370735_PM_at	0.0333847	1.09338	down	Olr1278	olfactory receptor 1278	286913	gb:AF010293.1 /DB_XREF=gi:2317703 /GEN=U131 /FEA=FLmRNA /CNT=1 /TID=Rn.10792.1 /TIER=FL /STK=1 /UG=Rn.10792 /DEF=Rattus norvegicus olfactory receptor (U131) mRNA, complete cds. /PROD=olfactory receptor /FL=gb:AF010293.1	AF010293	ENSRNOG00000005748
1370746_PM_at	0.0499136	1.16508	up	Prkacb	protein kinase, cAMP dependent, catalytic, beta	293508	gb:D10770.1 /DB_XREF=gi:220703 /FEA=FLmRNA /CNT=1 /TID=Affx.1.61 /TIER=FL /STK=1 /NOTE=sequence(s) not in UniGene /DEF=Rat mRNA for beta isoform of catalytic subunit of cAMP-dependent protein kinase, complete cds. /PROD=cAMP-dependent protein kinase catalyticsubunit-beta /FL=gb:D10770.1	D10770	ENSRNOG00000004978
1370755_PM_at	0.0123346	1.19069	up	Cacng4	calcium channel, voltage-dependent, gamma subunit 4	140725	gb:AF361341.1 /DB_XREF=gi:17974515 /GEN=Cacng4 /FEA=FLmRNA /CNT=1 /TID=Rn.81220.1 /TIER=FL /STK=1 /UG=Rn.81220 /DEF=Rattus norvegicus voltage-dependent calcium channel gamma-4 subunit (Cacng4) mRNA, complete cds. /PROD=voltage-dependent calcium channel gamma-4subunit /FL=gb:AF361341.1	AF361341	ENSRNOG00000003262
1370764_PM_a_at	0.00538772	1.11605	down	Tg	thyroglobulin	24826	gb:M35965.1 /DB_XREF=gi:206813 /FEA=FLmRNA /CNT=1 /TID=Rn.10429.2 /TIER=FL /STK=1 /UG=Rn.10429 /LL=24826 /UG_GENE=Tg /UG_TITLE=Thyroglobulin /DEF=Rat thyroglobulin (rTg-2) mRNA, complete cds. /FL=gb:M35965.1	M35965	ENSRNOG00000006104
1370776_PM_a_at	0.0319817	1.12686	down	Kcnk6	potassium inwardly-rectifying channel, subfamily K, member 6	116491	gb:AF281305.1 /DB_XREF=gi:9971950 /FEA=FLmRNA /CNT=1 /TID=Rn.43365.2 /TIER=FL /STK=1 /UG=Rn.43365 /LL=116491 /UG_GENE=Kcnk6 /DEF=Rattus norvegicus 2P domain K+ channel TWIK-2 mRNA, complete cds, alternatively spliced. /PROD=2P domain K+ channel TWIK-2 /FL=gb:AF281305.1	AF281305	ENSRNOG00000020598
1370782_PM_a_at	0.00769425	1.09936	down	Prpg1	proline-rich proteoglycan 1	257652	gb:L17317.1 /DB_XREF=gi:310197 /GEN=PRPG1 /FEA=FLmRNA /CNT=1 /TID=Rn.20733.2 /TIER=FL /STK=1 /UG=Rn.20733 /DEF=Rattus norvegicus proline-rich proteoglycan (PRPG1) mRNA, complete cds. /PROD=proline-rich proteoglycan /FL=gb:L17317.1	L17317	ENSRNOG00000010449
1370783_PM_a_at	0.0308062	1.05765	down	Ms4a2	membrane-spanning 4-domains, subfamily A, member 2 (Fc fragment of IgE, high affinity I, receptor for; beta polypeptide)	25316	gb:M22924.1 /DB_XREF=gi:204118 /FEA=FLmRNA /CNT=1 /TID=Rn.10922.2 /TIER=FL /STK=1 /UG=Rn.10922 /LL=25316 /UG_GENE=Fcer1b /UG_TITLE=membrane-spanning 4-domains, subfamily A, member 1 /DEF=Rat IgE Fc receptor deleted beta-subunit mRNA, complete cds. /FL=gb:M22924.1	M22924	ENSRNOG00000020993
1370785_PM_s_at	0.00885191	1.12286	down	Tomm20	translocase of outer mitochondrial membrane 20 homolog (yeast)	266601	gb:D63411.1 /DB_XREF=gi:1838934 /FEA=FLmRNA /CNT=1 /TID=Affx.1.66 /TIER=FL /STK=1 /NOTE=sequence(s) not in UniGene /DEF=Rat mRNA for mitochondrial precursor receptor, complete cds. /PROD=mitochondrial precursor receptor /FL=gb:D63411.1	D63411	ENSRNOG00000019980
1370793_PM_at	0.0422752	1.1193	down	---	---	---	gb:D89965.1 /DB_XREF=gi:1772461 /FEA=FLmRNA /CNT=1 /TID=Affx.1.67 /TIER=FL /STK=1 /NOTE=sequence(s) not in UniGene /DEF=Rattus norvegicus mRNA for RSS, complete cds. /PROD=RSS /FL=gb:D89965.1	D89965	---
1370814_PM_at	0.0447786	1.08845	down	Dhrs4	dehydrogenase/reductase (SDR family) member 4	266686	gb:AB062758.1 /DB_XREF=gi:17298120 /FEA=FLmRNA /CNT=16 /TID=Rn.12783.1 /TIER=FL+Stack /STK=11 /UG=Rn.12783 /DEF=Rattus norvegicus mRNA for carbonyl reductaseNADP-retinol dehydrogenase, complete cds. /PROD=carbonyl reductaseNADP-retinol dehydrogenase /FL=gb:AB062758.1	AB062758	ENSRNOG00000018239
1370815_PM_at	0.0286558	1.12901	up	Nefh	neurofilament, heavy polypeptide	24587	gb:AF031879.1 /DB_XREF=gi:2642597 /GEN=NF-H /FEA=FLmRNA /CNT=58 /TID=Rn.1429.1 /TIER=FL+Stack /STK=10 /UG=Rn.1429 /LL=24587 /DEF=Rattus norvegicus high molecular-weight neurofilament (NF-H) mRNA, complete cds. /PROD=high molecular-weight neurofilament /FL=gb:AF031879.1	AF031879	ENSRNOG00000008716
1370821_PM_at	0.017566	1.09329	down	Tpmt	thiopurine S-methyltransferase	690050	gb:AF120100.1 /DB_XREF=gi:4325176 /GEN=tpmt /FEA=FLmRNA /CNT=14 /TID=Rn.31429.2 /TIER=FL+Stack /STK=8 /UG=Rn.31429 /LL=83497 /DEF=Rattus norvegicus thiopurine S-methyltransferase (tpmt) mRNA, complete cds. /PROD=thiopurine S-methyltransferase /FL=gb:AF120100.1	AF120100	---
1370827_PM_at	0.0415502	1.05696	down	Cyb5r4	cytochrome b5 reductase 4	171015	gb:AF307840.1 /DB_XREF=gi:12007116 /FEA=FLmRNA /CNT=13 /TID=Rn.3334.1 /TIER=FL+Stack /STK=6 /UG=Rn.3334 /LL=171015 /UG_GENE=b5&b5R /DEF=Rattus norvegicus hemoflavoprotein b5b5r mRNA, complete cds. /PROD=hemoflavoprotein b5b5r /FL=gb:AF307840.1	AF307840	ENSRNOG00000010024
1370853_PM_at	0.0232765	1.23955	up	Camk2n1	calcium/calmodulin-dependent protein kinase II inhibitor 1	287005	gb:AA858621 /DB_XREF=gi:4229952 /DB_XREF=UI-R-E0-bq-b-10-0-UI.s1 /CLONE=UI-R-E0-bq-b-10-0-UI /FEA=FLmRNA /CNT=10 /TID=Rn.81198.1 /TIER=Stack /STK=6 /UG=Rn.81198 /UG_TITLE=Rattus norvegicus CaM-kinase II inhibitor alpha mRNA, complete cds /FL=gb:AF271156.1	AA858621	ENSRNOG00000016322
1370876_PM_at	0.0414084	1.13374	up	Map7d1	MAP7 domain containing 1	681287	gb:BI285436 /DB_XREF=gi:14939072 /DB_XREF=UI-R-DD0-caa-b-01-0-UI.s1 /CLONE=UI-R-DD0-caa-b-01-0-UI /FEA=mRNA /CNT=24 /TID=Rn.3048.1 /TIER=Stack /STK=20 /UG=Rn.3048 /LL=116690 /UG_GENE=Nfasc /UG_TITLE=neurofascin	BI285436	---
1370891_PM_at	0.0276454	1.14335	down	Cd48	Cd48 molecule	245962	gb:X13016.1 /DB_XREF=gi:56804 /FEA=mRNA /CNT=24 /TID=Rn.3705.1 /TIER=Stack /STK=13 /UG=Rn.3705 /DEF=Rat mRNA for MRC OX-45 surface antigen. /PROD=OX-45 antigen preprotein (AA -22 to 218)	X13016	ENSRNOG00000004737
1370904_PM_at	0.0144654	1.3142	up	Hla-dma	major histocompatibility complex, class II, DM alpha	294274	gb:BI301490 /DB_XREF=gi:14977770 /DB_XREF=UI-R-DN0-cit-m-01-0-UI.s1 /CLONE=UI-R-DN0-cit-m-01-0-UI /FEA=mRNA /CNT=12 /TID=Rn.35809.1 /TIER=Stack /STK=11 /UG=Rn.35809 /UG_TITLE=R.norvegicus mRNA for RT1.Ma	BI301490	ENSRNOG00000000460
1370931_PM_at	0.0187415	1.09011	down	Xrcc5	X-ray repair complementing defective repair in Chinese hamster cells 5	363247	gb:AA893188 /DB_XREF=gi:3020067 /DB_XREF=EST196991 /CLONE=RKIBD31 /FEA=mRNA /CNT=13 /TID=Rn.3585.1 /TIER=Stack /STK=7 /UG=Rn.3585 /UG_TITLE=Rattus norvegicus mRNA for Xrcc5, partial cds	AA893188	ENSRNOG00000016105
1370935_PM_at	0.0209643	1.12062	up	Cdw92	CDW92 antigen	85254	gb:AI105205 /DB_XREF=gi:3705151 /DB_XREF=EST214494 /CLONE=RKIBG91 /FEA=mRNA /CNT=12 /TID=Rn.25519.2 /TIER=Stack /STK=7 /UG=Rn.25519 /LL=85254 /UG_GENE=Ctl1 /UG_TITLE=transporter-like protein	AI105205	ENSRNOG00000017846
1370938_PM_at	0.0233863	1.20613	up	Sh3bp1///Pdxp	pyridoxal (pyridoxine, vitamin B6) phosphatase /// SH3-domain binding protein 1	727679///300067	gb:AI535144 /DB_XREF=gi:4449279 /DB_XREF=UI-R-C3-sp-g-07-0-UI.s1 /CLONE=UI-R-C3-sp-g-07-0-UI /FEA=mRNA /CNT=9 /TID=Rn.34753.1 /TIER=Stack /STK=7 /UG=Rn.34753 /UG_TITLE=Rattus norvegicus reg I binding protein I (Rbp1) mRNA, partial cds	AI535144	ENSRNOG00000009570
1370939_PM_at	0.0357673	1.17348	down	Acsl1	acyl-CoA synthetase long-chain family member 1	25288	gb:D90109.1 /DB_XREF=gi:220717 /FEA=mRNA /CNT=42 /TID=Rn.6215.1 /TIER=Stack /STK=6 /UG=Rn.6215 /LL=25288 /UG_GENE=Facl2 /UG_TITLE=fatty acid Coenzyme A ligase, long chain 2 /DEF=Rat mRNA for long-chain acyl-CoA synthetase (EC 6.2.1.3).	D90109	ENSRNOG00000010633
1370946_PM_at	0.00323998	1.43397	up	Nfix	nuclear factor I/X (CCAAT-binding transcription factor)	81524	gb:BF420722 /DB_XREF=gi:11408711 /DB_XREF=UI-R-BJ2-bpz-c-11-0-UI.s1 /CLONE=UI-R-BJ2-bpz-c-11-0-UI /FEA=mRNA /CNT=9 /TID=Rn.9647.1 /TIER=Stack /STK=6 /UG=Rn.9647 /LL=81524 /UG_GENE=Nfix /UG_TITLE=NF1-X1 protein	BF420722	ENSRNOG00000002983
1370949_PM_at	0.0220795	1.15421	up	Marcks/// LOC681252 ///LOC294446	similar to Myristoylated alanine-rich C-kinase substrate (MARCKS) (ACAMP-81) /// similar to Myristoylated alanine-rich C-kinase substrate (MARCKS) (Protein kinase C substrate 80 kDa protein) /// myristoylated alanine rich protein kinase C substrate	25603 /// 294446 /// 681252	gb:M59859.1 /DB_XREF=gi:205068 /FEA=mRNA /CNT=111 /TID=Rn.9560.1 /TIER=ConsEnd /STK=1 /UG=Rn.9560 /LL=25603 /UG_GENE=Macs /UG_TITLE=Myristoylated alanine-rich protein kinase C substrate /DEF=Rat mRNA.	M59859	ENSRNOG00000000579
1370957_PM_at	0.0165861	1.15983	up	Il6st	interleukin 6 signal transducer	25205	gb:BM383427 /DB_XREF=gi:18183480 /DB_XREF=UI-R-DM1-ckb-h-16-0-UI.s1 /CLONE=UI-R-DM1-ckb-h-16-0-UI /FEA=mRNA /CNT=14 /TID=Rn.12138.1 /TIER=Stack /STK=7 /UG=Rn.12138 /LL=25205 /UG_GENE=Il6st /UG_TITLE=Interleukin 6 signal transducer	BM383427	ENSRNOG00000013963
1370960_PM_at	0.0102608	1.12067	up	Igfbp5	insulin-like growth factor binding protein 5	25285	gb:BE104060 /DB_XREF=gi:8496160 /DB_XREF=UI-R-BX0-ark-c-06-0-UI.s1 /CLONE=UI-R-BX0-ark-c-06-0-UI /FEA=mRNA /CNT=45 /TID=Rn.1593.1 /TIER=Stack /STK=6 /UG=Rn.1593 /UG_TITLE=Rattus norvegicus insulin-like growth factor binding protein 5 mRNA, 3 prime UTR	BE104060	ENSRNOG00000017206
1370987_PM_at	0.0377819	1.15808	down	Spn	sialophorin	24796	gb:BF550890 /DB_XREF=gi:11660620 /DB_XREF=UI-R-C1-jz-c-05-0-UI.r1 /CLONE=UI-R-C1-jz-c-05-0-UI /FEA=mRNA /CNT=9 /TID=Rn.11144.1 /TIER=ConsEnd /STK=2 /UG=Rn.11144 /LL=24796 /UG_GENE=Spn /UG_TITLE=Sialophorin (gpL115, leukosianin, CD43)	BF550890	ENSRNOG00000036711
1371003_PM_at	0.0168684	2.21065	up	Map1b	microtubule-associated protein 1B	29456	gb:BG378086 /DB_XREF=gi:13302558 /DB_XREF=UI-R-CT0-bvn-g-03-0-UI.s1 /CLONE=UI-R-CT0-bvn-g-03-0-UI /FEA=mRNA /CNT=29 /TID=Rn.19032.1 /TIER=ConsEnd /STK=1 /UG=Rn.19032 /LL=29456 /UG_GENE=Map1b /UG_TITLE=microtubule-associated protein 5	BG378086	ENSRNOG00000017428
1371004_PM_at	0.0281498	1.17786	up	Sort1	sortilin 1	83576	gb:AI070124 /DB_XREF=gi:3396375 /DB_XREF=UI-R-Y0-lu-d-08-0-UI.s1 /CLONE=UI-R-Y0-lu-d-08-0-UI /FEA=mRNA /CNT=13 /TID=Rn.11286.1 /TIER=ConsEnd /STK=1 /UG=Rn.11286 /LL=83576 /UG_GENE=Sort1 /UG_TITLE=sortilin 1	AI070124	ENSRNOG00000031814
1371015_PM_at	0.0222673	1.11845	up	Mx1	myxovirus (influenza virus) resistance 1	24575	gb:X52711.1 /DB_XREF=gi:56720 /FEA=mRNA /CNT=4 /TID=Rn.10373.1 /TIER=ConsEnd /STK=1 /UG=Rn.10373 /UG_TITLE=Rat mRNA for Mx1 protein /DEF=Rat mRNA for Mx1 protein.	X52711	ENSRNOG00000001959
1371019_PM_at	0.00359321	1.22038	up	Trib1	tribbles homolog 1 (Drosophila)	78969	gb:BM387324 /DB_XREF=gi:18187377 /DB_XREF=UI-R-CN1-cjh-p-21-0-UI.s1 /CLONE=UI-R-CN1-cjh-p-21-0-UI /FEA=mRNA /CNT=3 /TID=Rn.64574.1 /TIER=ConsEnd /STK=1 /UG=Rn.64574 /LL=78969 /UG_GENE=Gig2 /UG_TITLE=G-protein-coupled receptor induced protein GIG2	BM387324	ENSRNOG00000004100
1371041_PM_at	0.0466397	1.06614	down	Ndufv2	NADH dehydrogenase (ubiquinone) flavoprotein 2	81728	gb:M22756.1 /DB_XREF=gi:205627 /FEA=mRNA /CNT=5 /TID=Rn.11092.1 /TIER=ConsEnd /STK=0 /UG=Rn.11092 /LL=81728 /UG_GENE=Ndufv2 /UG_TITLE=24-kDa subunit of mitochondrial NADH dehydrogenase /DEF=Rat 24-kDa subunit of mitochondrial NADH dehydrogenase mRNA, 3 end.	M22756	ENSRNOG00000032758
1371059_PM_at	0.0147001	1.24039	up	Prkar2a	protein kinase, cAMP dependent regulatory, type II alpha	29699	gb:AW919085 /DB_XREF=gi:8084875 /DB_XREF=EST350389 /CLONE=RGIFC55 /FEA=mRNA /CNT=5 /TID=Rn.9742.1 /TIER=ConsEnd /STK=0 /UG=Rn.9742 /LL=29699 /UG_GENE=Prkar2a /UG_TITLE=protein kinase, cAMP dependent regulatory, type II alpha	AW919085	---
1371068_PM_at	0.0107677	1.20372	up	Pcdhac2///Pcdha13	protocadherin alpha subfamily C, 2"///"protocadherin alpha 13	116742 /// 393092	gb:AW524833 /DB_XREF=gi:7167218 /DB_XREF=UI-R-BO0-ahy-g-11-0-UI.s1 /CLONE=UI-R-BO0-ahy-g-11-0-UI /FEA=mRNA /CNT=3 /TID=Rn.53941.1 /TIER=ConsEnd /STK=0 /UG=Rn.53941 /UG_TITLE=Rattus norvegicus cnr5 mRNA for cadherin-related neuronal receptor 5, partial cds	AW524833	ENSRNOG00000020119
1371069_PM_at	0.0115421	1.16527	up	Slc22a23	solute carrier family 22, member 23	64559	gb:AF184921.1 /DB_XREF=gi:6010762 /GEN=NRITP /FEA=mRNA /CNT=3 /TID=Rn.48738.1 /TIER=ConsEnd /STK=0 /UG=Rn.48738 /LL=64559 /DEF=Rattus norvegicus ion transporter protein (NRITP) mRNA, partial cds. /PROD=ion transporter protein	AF184921	ENSRNOG00000017210
1371095_PM_at	0.0411532	1.10511	up	Kif6	kinesin family member 6	171291	gb:AY035403.1 /DB_XREF=gi:19352208 /GEN=Krp3b /FEA=mRNA /CNT=1 /TID=Rn.82703.1 /TIER=ConsEnd /STK=1 /UG=Rn.82703 /DEF=Rattus norvegicus kinesin-related protein 3B (Krp3b) mRNA, partial cds. /PROD=kinesin-related protein 3B	AY035403	ENSRNOG00000011453
1371127_PM_at	0.0426898	1.20755	up	Bmp1	bone morphogenetic protein 1	83470	gb:AB012139.1 /DB_XREF=gi:4519514 /FEA=mRNA /CNT=2 /TID=Rn.21363.1 /TIER=ConsEnd /STK=0 /UG=Rn.21363 /LL=83470 /UG_GENE=Bmp1 /DEF=Rattus norvegicus mRNA for procollagen C-proteinase 3, partial cds. /PROD=procollagen C-proteinase 3	AB012139	ENSRNOG00000010890
1371132_PM_a_at	0.037596	1.25195	up	Ank3	ankyrin 3, epithelial	361833	gb:AJ428573.1 /DB_XREF=gi:18376634 /GEN=ank3 /FEA=mRNA /CNT=1 /TID=Rn.52763.2 /TIER=ConsEnd /STK=0 /UG=Rn.52763 /LL=83682 /DEF=Rattus norvegicus mRNA for ankyrin G107 (ank3 gene). /PROD=ankyrin G107	AJ428573	ENSRNOG00000024011
1371143_PM_at	0.0139182	1.0845	down	Serpina7	serine (or cysteine) peptidase inhibitor, clade A (alpha-1 antiproteinase, antitrypsin), member 7	81806	gb:M63991.1 /DB_XREF=gi:207159 /GEN=TBG /FEA=mRNA /CNT=1 /TID=Rn.9948.1 /TIER=ConsEnd /STK=0 /UG=Rn.9948 /LL=81806 /DEF=Rat thyroxine-binding globulin (TBG) mRNA, 3 end. /PROD=thyroxine-binding globulin	M63991	ENSRNOG00000011081
1371148_PM_s_at	0.00246691	1.23091	up	Ina	internexin neuronal intermediate filament protein, alpha	24503	gb:X52017.1 /DB_XREF=gi:55621 /GEN=alpha-1.6 /FEA=mRNA /CNT=1 /TID=Rn.82712.1 /TIER=ConsEnd /STK=0 /UG=Rn.82712 /LL=171367 /DEF=R.norvegicus mRNA for alpha-internexin. /PROD=alpha-internexin	X52017	ENSRNOG00000020248
1371151_PM_at	0.00957315	1.11909	down	Cpa3	carboxypeptidase A3, mast cell	54242	gb:U67914.1 /DB_XREF=gi:1698707 /GEN=R-CPA /FEA=mRNA /CNT=1 /TID=Rn.10700.1 /TIER=ConsEnd /STK=0 /UG=Rn.10700 /LL=54242 /DEF=Rattus norvegicus mast cell carboxypeptidase A precursor (R-CPA) mRNA, partial cds. /PROD=mast cell carboxypeptidase A precursor	U67914	ENSRNOG00000011181
1371168_PM_at	0.0214394	1.10392	up	Mpp2	membrane protein, palmitoylated 2 (MAGUK p55 subfamily member 2)	85275	gb:AF087696.1 /DB_XREF=gi:3687904 /FEA=mRNA /CNT=1 /TID=Rn.44271.1 /TIER=ConsEnd /STK=0 /UG=Rn.44271 /LL=85275 /UG_GENE=Mpp2 /DEF=Rattus norvegicus dlg 2 mRNA, partial cds. /PROD=dlg 2	AF087696	ENSRNOG00000020850
1371170_PM_a_at	0.0314229	1.09033	up	Il1a	interleukin 1 alpha	24493	gb:AJ245643.1 /DB_XREF=gi:9844630 /GEN=IL-1 alpha /FEA=mRNA /CNT=1 /TID=Rn.12300.2 /TIER=ConsEnd /STK=0 /UG=Rn.12300 /LL=24493 /DEF=Rattus norvegicus mRNA for interleukin 1 alpha, splice variant (IL-1 alpha gene). /PROD=24 proIl-1 alpha	AJ245643	ENSRNOG00000004575
1371201_PM_at	0.0321599	1.12071	down	Sstr1	somatostatin receptor 1	25033	gb:L02915.1 /DB_XREF=gi:207013 /FEA=mRNA /CNT=1 /TID=Rn.42915.2 /TIER=ConsEnd /STK=0 /UG=Rn.42915 /LL=25033 /UG_GENE=Sstr1 /UG_TITLE=Somatostatin receptor subtype 1 /DEF=Rattus norvegicus mRNA fragment.	L02915	---
1371202_PM_a_at	0.0138059	1.39856	up	Nfib	nuclear factor I/B	29227	gb:AB012232.1 /DB_XREF=gi:2982731 /GEN=NF1-B /FEA=mRNA /CNT=1 /TID=Rn.9909.2 /TIER=ConsEnd /STK=0 /UG=Rn.9909 /LL=29227 /DEF=Rattus norvegicus mRNA for NF1-B3, partial cds. /PROD=NF1-B3	AB012232	ENSRNOG00000009795
1371203_PM_at	0.0295548	1.11753	up	Prkci	protein kinase C, iota	84006	gb:AB020615.1 /DB_XREF=gi:4996215 /GEN=PKC lambda /FEA=mRNA /CNT=1 /TID=Rn.42887.1 /TIER=ConsEnd /STK=0 /UG=Rn.42887 /LL=84006 /UG_TITLE=protein kinase C, lambda /DEF=Rattus norvegicus PKC lambda mRNA, partial cds.	AB020615	---
1371224_PM_a_at	0.040057	1.07131	up	Drp2	dystrophin related protein 2	66027	gb:AF195789.1 /DB_XREF=gi:11066168 /GEN=Drp2 /FEA=mRNA /CNT=1 /TID=Rn.64510.3 /TIER=ConsEnd /STK=0 /UG=Rn.64510 /LL=66027 /DEF=Rattus norvegicus dystrophin-related protein 2 splice variant (Drp2) mRNA, partial cds. /PROD=dystrophin-related protein 2 splice variant	AF195789	ENSRNOG00000026704
1371249_PM_at	0.0255518	1.27206	up	Xbp1	X-box binding protein 1	289754	gb:BF417262 /DB_XREF=gi:11405251 /DB_XREF=UI-R-CN0-blc-h-11-0-UI.s1 /CLONE=UI-R-CN0-blc-h-11-0-UI /FEA=DNA /CNT=23 /TID=Rn.13157.1 /TIER=Stack /STK=9 /UG=Rn.13157 /UG_TITLE=Rattus norvegicus gene for hepatocarcinogenesis-related transcription factor (HTF), complete cds	BF417262	ENSRNOG00000010298
1371253_PM_at	0.000480841	1.11336	down	Etfa	electron-transfer-flavoprotein, alpha polypeptide	300726	gb:AA942749 /DB_XREF=gi:3102665 /DB_XREF=EST198248 /CLONE=RBRAA61 /FEA=DNA /CNT=62 /TID=Rn.32496.1 /TIER=Stack /STK=7 /UG=Rn.32496 /UG_TITLE=Rat electron transfer flavoprotein (ETF) alpha-subunit DNA, 3 end	AA942749	ENSRNOG00000015233
1371266_PM_at	0.00604555	1.1805	down	Afm	afamin	282708	gb:X76456 /DB_XREF=gi:456358 /FEA=DNA /CNT=1 /TID=Rn.32082.1 /TIER=ConsEnd /STK=0 /UG=Rn.32082 /UG_TITLE=R.norvegicus (Sprague Dawley) alpha albumin gene /DEF=R.norvegicus (Sprague Dawley) alpha albumin gene	X76456	ENSRNOG00000002878
1371295_PM_at	0.0255928	1.05958	down	Rps20	ribosomal protein S20	122772	gb:AW914097 /DB_XREF=gi:8079757 /DB_XREF=EST345388 /CLONE=RGIAA32 /FEA=EST /CNT=165 /TID=Rn.1931.1 /TIER=Stack /STK=119 /UG=Rn.1931 /UG_TITLE=ESTs, Highly similar to 40S RIBOSOMAL PROTEIN S20 (R.norvegicus)	AW914097	---
1371296_PM_at	0.00349591	1.11426	down	Sdhd	succinate dehydrogenase complex, subunit D, integral membrane protein	363061	gb:AI410703 /DB_XREF=gi:4254207 /DB_XREF=EST238996 /CLONE=RHECU48 /FEA=EST /CNT=112 /TID=Rn.3040.1 /TIER=Stack /STK=14 /UG=Rn.3040 /UG_TITLE=ESTs, Moderately similar to DHSD_HUMAN SUCCINATE DEHYDROGENASE (H.sapiens)	AI410703	ENSRNOG00000022980
1371301_PM_at	0.03193	1.03919	down	Rpl9	ribosomal protein L9	29257	gb:BG666892 /DB_XREF=gi:13888814 /DB_XREF=DRACPG04 /CLONE=DRACPG04 /FEA=EST /CNT=86 /TID=Rn.3779.1 /TIER=Stack /STK=66 /UG=Rn.3779 /UG_TITLE=ESTs, Highly similar to RL9 RAT 60S RIBOSOMAL PROTEIN L9 (R.norvegicus)	BG666892	ENSRNOG00000030476 /// ENSRNOG00000026716 /// ENSRNOG00000030621///ENSRNOG00000011346
1371312_PM_at	0.0320071	1.09572	down	Chchd2	coiled-coil-helix-coiled-coil-helix domain containing 2	316643	gb:AA799736 /DB_XREF=gi:2862691 /DB_XREF=EST189233 /CLONE=RHEAE64 /FEA=EST /CNT=53 /TID=Rn.1023.2 /TIER=Stack /STK=49 /UG=Rn.1023 /UG_TITLE=Rat liver stearyl-CoA desaturase mRNA, complete cds	AA799736	ENSRNOG00000000918
1371317_PM_at	0.0347005	1.18671	up	Ldb1	LIM domain binding 1	309447	gb:BI296590 /DB_XREF=gi:14961166 /DB_XREF=UI-R-CV2-cgt-a-04-0-UI.s1 /CLONE=UI-R-CV2-cgt-a-04-0-UI /FEA=EST /CNT=49 /TID=Rn.1707.1 /TIER=Stack /STK=43 /UG=Rn.1707 /UG_TITLE=ESTs, Highly similar to Ldb1a (M.musculus)	BI296590	ENSRNOG00000018468
1371323_PM_at	0.00374361	1.07349	down	Ndufa4	NADH dehydrogenase (ubiquinone) 1 alpha subcomplex, 4	681024	gb:BG666002 /DB_XREF=gi:13887924 /DB_XREF=DRACMA02 /CLONE=DRACMA02 /FEA=EST /CNT=61 /TID=Rn.793.2 /TIER=Stack /STK=41 /UG=Rn.793 /LL=83615 /UG_GENE=Atp6s1 /UG_TITLE=ATPase, H+ transporting, lysosomal (vacuolar proton pump), subunit 1	BG666002	---
1371335_PM_at	0.0256739	1.09644	down	Atp5l	ATP synthase, H+ transporting, mitochondrial F0 complex, subunit G	300677	gb:AA944393 /DB_XREF=gi:3104309 /DB_XREF=EST199892 /CLONE=REMAG49 /FEA=EST /CNT=60 /TID=Rn.2462.1 /TIER=Stack /STK=38 /UG=Rn.2462 /UG_TITLE=ESTs, Moderately similar to T08727 probable H+-transporting ATP synthase (H.sapiens)	AA944393	ENSRNOG00000028884
1371363_PM_at	0.0275184	1.13464	down	Gpd1	glycerol-3-phosphate dehydrogenase 1 (soluble)	60666	gb:BI277042 /DB_XREF=gi:14922537 /DB_XREF=UI-R-CY0-bxp-g-07-0-UI.s1 /CLONE=UI-R-CY0-bxp-g-07-0-UI /FEA=EST /CNT=36 /TID=Rn.1354.1 /TIER=Stack /STK=33 /UG=Rn.1354 /UG_TITLE=ESTs	BI277042	ENSRNOG00000019213
1371375_PM_at	0.00287429	1.07446	down	Dstn	destrin	502674	gb:BI285599 /DB_XREF=gi:14939419 /DB_XREF=UI-R-CW0-bvv-b-03-0-UI.s2 /CLONE=UI-R-CW0-bvv-b-03-0-UI /FEA=EST /CNT=34 /TID=Rn.16116.1 /TIER=Stack /STK=31 /UG=Rn.16116 /UG_TITLE=ESTs, Moderately similar to I Chain I, Beta-Galactosidase (Chains I-P) (E.coli)	BI285599	---
1371387_PM_at	0.0400093	1.08434	down	Cox7b	cytochrome c oxidase subunit VIIb	303393	gb:AA866477 /DB_XREF=gi:4230003 /DB_XREF=UI-R-E0-br-h-03-0-UI.s1 /CLONE=UI-R-E0-br-h-03-0-UI /FEA=EST /CNT=42 /TID=Rn.2026.1 /TIER=Stack /STK=29 /UG=Rn.2026 /UG_TITLE=ESTs, Moderately similar to COXM MOUSE CYTOCHROME C OXIDASE POLYPEPTIDE VIIB PRECURSOR (M.musculus)	AA866477	ENSRNOG00000028451
1371396_PM_at	0.00493557	1.09378	down	---	---	---	gb:AI600035 /DB_XREF=gi:4609083 /DB_XREF=EST251738 /CLONE=REMDO69 /FEA=EST /CNT=34 /TID=Rn.2643.1 /TIER=Stack /STK=28 /UG=Rn.2643 /UG_TITLE=ESTs, Highly similar to CGB0_HUMAN HYPOTHETICAL PROTEIN CGI-110 (PROTEIN HSPC175) (H.sapiens)	AI600035	---
1371398_PM_at	0.00845703	1.08652	down	LOC684567	similar to ATP synthase, H+ transporting, mitochondrial F0 complex, subunit f, isoform 2	684567	gb:BF281400 /DB_XREF=gi:11212470 /DB_XREF=EST445991 /CLONE=RGIAE29 /FEA=EST /CNT=44 /TID=Rn.3543.1 /TIER=Stack /STK=27 /UG=Rn.3543 /UG_TITLE=ESTs, Highly similar to ATPK MOUSE ATP SYNTHASE F CHAIN, MITOCHONDRIAL (M.musculus)	BF281400	ENSRNOG00000027049
1371415_PM_at	0.000260238	1.12838	down	Uqcrh	ubiquinol-cytochrome c reductase hinge protein	366448	gb:BI279016 /DB_XREF=gi:14926426 /DB_XREF=UI-R-CZ0-byi-b-03-0-UI.s1 /CLONE=UI-R-CZ0-byi-b-03-0-UI /FEA=EST /CNT=38 /TID=Rn.7401.1 /TIER=Stack /STK=26 /UG=Rn.7401 /UG_TITLE=ESTs, Moderately similar to UCRH_HUMAN UBIQUINOL-CYTOCHROME C REDUCTASE COMPLEX 11 KDA PROTEIN PRECURSOR (H.sapiens)	BI279016	ENSRNOG00000012550
1371420_PM_at	0.00580729	1.14719	down	LOC494529	92Aa-Protein	494529	gb:AI412054 /DB_XREF=gi:4255558 /DB_XREF=EST240348 /CLONE=RKIEH71 /FEA=EST /CNT=30 /TID=Rn.7342.1 /TIER=Stack /STK=26 /UG=Rn.7342 /UG_TITLE=ESTs	AI412054	ENSRNOG00000037087
1371427_PM_at	0.00437865	1.05629	down	Spcs1	signal peptidase complex subunit 1 homolog (S. cerevisiae)	290555	gb:BG380709 /DB_XREF=gi:13305181 /DB_XREF=UI-R-CT0-bua-e-06-0-UI.s1 /CLONE=UI-R-CT0-bua-e-06-0-UI /FEA=EST /CNT=45 /TID=Rn.3781.1 /TIER=Stack /STK=25 /UG=Rn.3781 /UG_TITLE=ESTs, Highly similar to 2208369A signal peptidase:SUBUNIT=12kD (H.sapiens)	BG380709	ENSRNOG00000018075
1371428_PM_at	0.0043536	1.08795	down	Sec61g	SEC61, gamma subunit	689134	gb:AI170002 /DB_XREF=gi:3710042 /DB_XREF=EST215918 /CLONE=RLIAY40 /FEA=EST /CNT=34 /TID=Rn.1965.2 /TIER=Stack /STK=25 /UG=Rn.1965 /LL=64053 /UG_GENE=Dlg2 /UG_TITLE=discs, large (Drosophila) homolog 2 (chapsyn-110)	AI170002	---
1371437_PM_at	0.0496075	1.08085	down	Sec13	SEC13 homolog (S. cerevisiae)	297522	gb:BM986228 /DB_XREF=gi:19705617 /DB_XREF=EST531682 /CLONE=RGIAB07 /FEA=EST /CNT=28 /TID=Rn.1553.1 /TIER=Stack /STK=25 /UG=Rn.1553 /UG_TITLE=ESTs, Highly similar to SC13_HUMAN SEC13-RELATED PROTEIN (H.sapiens)	BM986228	---
1371458_PM_at	0.0451871	1.10006	down	---	---	---	gb:BF392740 /DB_XREF=gi:11377602 /DB_XREF=UI-R-CA0-bfm-g-05-0-UI.s1 /CLONE=UI-R-CA0-bfm-g-05-0-UI /FEA=EST /CNT=24 /TID=Rn.63638.1 /TIER=Stack /STK=24 /UG=Rn.63638 /UG_TITLE=ESTs	BF392740	---
1371463_PM_at	0.00737396	1.10503	down	Phf5a	PHD finger protein 5A	192246	gb:AI233239 /DB_XREF=gi:3817119 /DB_XREF=EST229927 /CLONE=RKIDC59 /FEA=EST /CNT=31 /TID=Rn.9116.1 /TIER=Stack /STK=23 /UG=Rn.9116 /UG_TITLE=ESTs, Highly similar to U123_HUMAN HYPOTHETICAL 12.4 KDA PROTEIN BK223H9.2 (H.sapiens)	AI233239	ENSRNOG00000024170
1371464_PM_at	0.0387957	1.09265	down	Zfand6	zinc finger, AN1-type domain 6	293067	gb:BI295799 /DB_XREF=gi:14959608 /DB_XREF=UI-R-DK0-cfa-g-06-0-UI.s1 /CLONE=UI-R-DK0-cfa-g-06-0-UI /FEA=EST /CNT=30 /TID=Rn.2902.1 /TIER=Stack /STK=23 /UG=Rn.2902 /UG_TITLE=ESTs	BI295799	ENSRNOG00000013506
1371467_PM_at	0.0220502	1.0789	down	LOC293103	similar to RIKEN cDNA 0610007P06	293103	gb:AA891221 /DB_XREF=gi:3018100 /DB_XREF=EST195024 /CLONE=RHEAQ70 /FEA=EST /CNT=29 /TID=Rn.1978.1 /TIER=Stack /STK=23 /UG=Rn.1978 /UG_TITLE=ESTs, Weakly similar to T32619 hypothetical protein F42A6.6 - Caenorhabditis elegans (C.elegans)	AA891221	---
1371473_PM_at	0.0455184	1.15823	up	Clptm1	cleft lip and palate associated transmembrane protein 1	292696	gb:BI284472 /DB_XREF=gi:14937183 /DB_XREF=UI-R-CX0s-ccr-e-02-0-UI.s1 /CLONE=UI-R-CX0s-ccr-e-02-0-UI /FEA=EST /CNT=28 /TID=Rn.8842.1 /TIER=Stack /STK=23 /UG=Rn.8842 /UG_TITLE=ESTs, Weakly similar to T24228 hypothetical protein R166.2 - Caenorhabditis elegans (C.elegans)	BI284472	ENSRNOG00000018255
1371484_PM_at	0.0065154	1.10299	down	LOC690349	hypothetical protein LOC690349	690349	gb:BM390252 /DB_XREF=gi:18190305 /DB_XREF=UI-R-CN1-cjq-m-07-0-UI.s1 /CLONE=UI-R-CN1-cjq-m-07-0-UI /FEA=EST /CNT=28 /TID=Rn.1686.1 /TIER=Stack /STK=22 /UG=Rn.1686 /UG_TITLE=ESTs	BM390252	---
1371509_PM_at	0.0199501	1.08199	down	Tbrg1	transforming growth factor beta regulator 1	300521	gb:BG666773 /DB_XREF=gi:13888695 /DB_XREF=DRABWC12 /CLONE=DRABWC12 /FEA=EST /CNT=32 /TID=Rn.127.1 /TIER=Stack /STK=21 /UG=Rn.127 /UG_TITLE=ESTs, Weakly similar to T03454 ALR protein (H.sapiens)	BG666773	ENSRNOG00000033891///ENSRNOG00000023850
1371512_PM_at	0.00458399	1.09432	down	---	---	---	gb:AA818692 /DB_XREF=gi:4225844 /DB_XREF=UI-R-A0-az-b-10-0-UI.s1 /CLONE=UI-R-A0-az-b-10-0-UI /FEA=EST /CNT=26 /TID=Rn.1432.1 /TIER=Stack /STK=21 /UG=Rn.1432 /UG_TITLE=ESTs, Moderately similar to ribosomal protein L33-like protein (H.sapiens)	AA818692	ENSRNOG00000025388
1371514_PM_at	0.0391167	1.05674	up	Kdelr1	KDEL (Lys-Asp-Glu-Leu) endoplasmic reticulum protein retention receptor 1	361577	gb:BI278612 /DB_XREF=gi:14925631 /DB_XREF=UI-R-CW0-bxn-g-04-0-UI.s1 /CLONE=UI-R-CW0-bxn-g-04-0-UI /FEA=EST /CNT=27 /TID=Rn.1819.1 /TIER=Stack /STK=21 /UG=Rn.1819 /UG_TITLE=ESTs, Highly similar to S13293 KDEL receptor (H.sapiens)	BI278612	ENSRNOG00000021082
1371524_PM_at	0.0127263	1.10068	down	Gtl3	gene trap locus 3	307642	gb:AI009608 /DB_XREF=gi:3223440 /DB_XREF=EST204059 /CLONE=RLUBG27 /FEA=EST /CNT=24 /TID=Rn.6708.1 /TIER=Stack /STK=21 /UG=Rn.6708 /UG_TITLE=ESTs	AI009608	ENSRNOG00000023092
1371539_PM_at	0.0335107	1.12433	down	Nola2	nucleolar protein family A, member 2	287273	gb:AW921151 /DB_XREF=gi:8086972 /DB_XREF=EST352455 /CLONE=RGIHP03 /FEA=EST /CNT=28 /TID=Rn.4216.1 /TIER=Stack /STK=20 /UG=Rn.4216 /UG_TITLE=ESTs, Weakly similar to NHPX RAT NHP2RS6 FAMILY PROTEIN YEL026W HOMOLOG (R.norvegicus)	AW921151	ENSRNOG00000004247
1371562_PM_at	0.0343454	1.10743	down	Epn2	epsin 2	60443	gb:BI296640 /DB_XREF=gi:14961266 /DB_XREF=UI-R-CV2-cgt-f-01-0-UI.s1 /CLONE=UI-R-CV2-cgt-f-01-0-UI /FEA=EST /CNT=22 /TID=Rn.25139.1 /TIER=Stack /STK=20 /UG=Rn.25139 /UG_TITLE=ESTs	BI296640	ENSRNOG00000002523
1371570_PM_at	0.00145177	1.24808	up	Scrt1	scratch homolog 1, zinc finger protein (Drosophila)	366951	gb:AI406266 /DB_XREF=gi:4249770 /DB_XREF=EST234552 /CLONE=RBRDL89 /FEA=EST /CNT=20 /TID=Rn.9529.1 /TIER=Stack /STK=20 /UG=Rn.9529 /UG_TITLE=ESTs, Moderately similar to T31067 BIR repeat containing ubiquitin-conjugating enzyme BRUCE - mouse (M.musculus)	AI406266	ENSRNOG00000025594
1371571_PM_at	0.00381244	1.08815	up	App	amyloid beta (A4) precursor protein	54226	gb:BG671677 /DB_XREF=gi:13893776 /DB_XREF=DRNBWD09 /CLONE=DRNBWD09 /FEA=EST /CNT=81 /TID=Rn.2104.1 /TIER=Stack /STK=19 /UG=Rn.2104 /UG_TITLE=ESTs, Moderately similar to A4 RAT ALZHEIMERS DISEASE AMYLOID A4 PROTEIN HOMOLOG PRECURSOR (R.norvegicus)	BG671677	ENSRNOG00000006997
1371595_PM_at	0.0439212	1.40141	down	---	---	---	gb:BM384301 /DB_XREF=gi:18184354 /DB_XREF=UI-R-DY0-ckr-f-06-0-UI.s1 /CLONE=UI-R-DY0-ckr-f-06-0-UI /FEA=EST /CNT=24 /TID=Rn.8145.1 /TIER=Stack /STK=19 /UG=Rn.8145 /UG_TITLE=ESTs	BM384301	---
1371603_PM_at	0.0281832	1.09638	up	Prr3	proline rich 3	361788	gb:BI291379 /DB_XREF=gi:14950867 /DB_XREF=UI-R-CV2-cgp-d-06-0-UI.s1 /CLONE=UI-R-CV2-cgp-d-06-0-UI /FEA=EST /CNT=22 /TID=Rn.18038.1 /TIER=Stack /STK=19 /UG=Rn.18038 /UG_TITLE=ESTs	BI291379	ENSRNOG00000025806
1371619_PM_at	0.0268754	1.06147	up	RGD1310352	similar to HTGN29 protein; keratinocytes associated transmembrane protein 2	303122	gb:BI296718 /DB_XREF=gi:14961425 /DB_XREF=UI-R-CV2-cgv-e-06-0-UI.s1 /CLONE=UI-R-CV2-cgv-e-06-0-UI /FEA=EST /CNT=21 /TID=Rn.8689.1 /TIER=Stack /STK=19 /UG=Rn.8689 /UG_TITLE=ESTs	BI296718	ENSRNOG00000006148
1371623_PM_at	0.0313853	1.1368	down	LOC685888	hypothetical protein LOC685888	685888	gb:AI411896 /DB_XREF=gi:4255400 /DB_XREF=EST240190 /CLONE=RKIEK05 /FEA=EST /CNT=20 /TID=Rn.8371.1 /TIER=Stack /STK=19 /UG=Rn.8371 /UG_TITLE=ESTs	AI411896	---
1371634_PM_at	0.00360889	1.13957	down	Tmem126a	transmembrane protein 126A	293113	gb:BE107851 /DB_XREF=gi:8499956 /DB_XREF=UI-R-CA0-awx-f-01-0-UI.s1 /CLONE=UI-R-CA0-awx-f-01-0-UI /FEA=EST /CNT=31 /TID=Rn.3524.1 /TIER=Stack /STK=18 /UG=Rn.3524 /UG_TITLE=ESTs	BE107851	ENSRNOG00000022748
1371638_PM_at	0.0314847	1.06552	down	Rnf7	ring finger protein 7	300948	gb:AA858518 /DB_XREF=gi:4229851 /DB_XREF=UI-R-E0-bt-e-04-0-UI.s1 /CLONE=UI-R-E0-bt-e-04-0-UI /FEA=EST /CNT=26 /TID=Rn.2768.1 /TIER=Stack /STK=18 /UG=Rn.2768 /UG_TITLE=ESTs, Weakly similar to T51146 ring-box protein 1 (H.sapiens)	AA858518	ENSRNOG00000011663
1371644_PM_at	0.0471148	1.07955	down	Twf1	twinfilin, actin-binding protein, homolog 1 (Drosophila)	315265	gb:BF283086 /DB_XREF=gi:11214156 /DB_XREF=EST447677 /CLONE=RGIDX31 /FEA=EST /CNT=23 /TID=Rn.3616.1 /TIER=Stack /STK=18 /UG=Rn.3616 /UG_TITLE=ESTs	BF283086	ENSRNOG00000022507
1371679_PM_at	0.0170198	1.13053	up	Synpo2	synaptopodin 2	499702	gb:BE113393 /DB_XREF=gi:8505498 /DB_XREF=UI-R-BJ1-awe-g-12-0-UI.s1 /CLONE=UI-R-BJ1-awe-g-12-0-UI /FEA=EST /CNT=18 /TID=Rn.7078.1 /TIER=Stack /STK=18 /UG=Rn.7078 /UG_TITLE=ESTs	BE113393	ENSRNOG00000014867
1371692_PM_at	0.0238855	1.17709	up	Mllt11	myeloid/lymphoid or mixed-lineage leukemia (trithorax homolog, Drosophila); translocated to, 11	295264	gb:AI009661 /DB_XREF=gi:4133087 /DB_XREF=EST204112 /CLONE=RLUBG91 /FEA=EST /CNT=37 /TID=Rn.3180.1 /TIER=Stack /STK=17 /UG=Rn.3180 /UG_TITLE=ESTs, Moderately similar to AF1Q MOUSE PROTEIN AF1Q (M.musculus)	AI009661	ENSRNOG00000021110
1371693_PM_at	0.00638383	1.09408	up	LOC681996	similar to AHA1, activator of heat shock 90kDa protein ATPase homolog 1	681996	gb:AA849757 /DB_XREF=gi:4131765 /DB_XREF=EST192524 /CLONE=RMUAI51 /FEA=EST /CNT=24 /TID=Rn.3553.1 /TIER=Stack /STK=17 /UG=Rn.3553 /UG_TITLE=ESTs, Highly similar to C143_HUMAN PROTEIN C14ORF3 (PROTEIN HSPC322) (H.sapiens)	AA849757	---
1371720_PM_at	0.0105511	1.1226	down	Mrpl20	mitochondrial ribosomal protein L20	680747	gb:AI599839 /DB_XREF=gi:4608887 /DB_XREF=EST251542 /CLONE=REMEM05 /FEA=EST /CNT=21 /TID=Rn.2913.1 /TIER=Stack /STK=17 /UG=Rn.2913 /UG_TITLE=ESTs, Weakly similar to RL20_ECOLI 50S ribosomal protein L20 (E.coli)	AI599839	ENSRNOG00000018647
1371745_PM_at	0.0081582	1.09979	down	Cwc15	CWC15 spliceosome-associated protein homolog (S. cerevisiae)	300361	gb:AI179388 /DB_XREF=gi:3730026 /DB_XREF=EST223089 /CLONE=RSPCG54 /FEA=EST /CNT=21 /TID=Rn.4318.1 /TIER=Stack /STK=17 /UG=Rn.4318 /UG_TITLE=ESTs, Weakly similar to T10C6.5.p (Caenorhabditis elegans) (C.elegans)	AI179388	ENSRNOG00000008490
1371753_PM_at	0.00350063	1.12084	down	LOC296235	similar to Cystatin S precursor (LM protein)	296235	gb:BI285082 /DB_XREF=gi:14938372 /DB_XREF=UI-R-DB0-byw-a-02-0-UI.s1 /CLONE=UI-R-DB0-byw-a-02-0-UI /FEA=EST /CNT=17 /TID=Rn.79319.1 /TIER=Stack /STK=17 /UG=Rn.79319 /UG_TITLE=ESTs, Weakly similar to CYTS RAT CYSTATIN S PRECURSOR (R.norvegicus)	BI285082	ENSRNOG00000036952
1371761_PM_at	0.0388536	1.02338	down	Rpl34	ribosomal protein L34	362041	gb:AI013910 /DB_XREF=gi:3227966 /DB_XREF=EST208585 /CLONE=RSPBZ37 /FEA=EST /CNT=32 /TID=Rn.2028.1 /TIER=Stack /STK=16 /UG=Rn.2028 /UG_TITLE=ESTs, Moderately similar to RL34 RAT 60S RIBOSOMAL PROTEIN L34 (R.norvegicus)	AI013910	ENSRNOG00000038045///ENSRNOG00000016387
1371774_PM_at	0.0233312	1.15869	down	Sat1	spermidine/spermine N1-acetyl transferase 1	302642	gb:AA893220 /DB_XREF=gi:4132263 /DB_XREF=EST197023 /CLONE=RKIBD68 /FEA=EST /CNT=21 /TID=Rn.2604.1 /TIER=Stack /STK=16 /UG=Rn.2604 /UG_TITLE=ESTs, Highly similar to DIAMINE ACETYLTRANSFERASE (M.musculus)	AA893220	---
1371776_PM_at	0.0368281	1.25764	up	---	---	---	gb:AA819268 /DB_XREF=gi:4227927 /DB_XREF=UI-R-A0-al-d-12-0-UI.s2 /CLONE=UI-R-A0-al-d-12-0-UI /FEA=EST /CNT=20 /TID=Rn.2676.1 /TIER=Stack /STK=16 /UG=Rn.2676 /UG_TITLE=ESTs	AA819268	---
1371783_PM_at	0.0289855	1.0854	down	Selk	selenoprotein K	290549	gb:AI009936 /DB_XREF=gi:3223768 /DB_XREF=EST204387 /CLONE=RLUBR05 /FEA=EST /CNT=20 /TID=Rn.8837.1 /TIER=Stack /STK=16 /UG=Rn.8837 /UG_TITLE=ESTs, Highly similar to HC30_HUMAN PROTEIN HSPC030 (H.sapiens)	AI009936	ENSRNOG00000014624
1371793_PM_at	0.0425034	1.13766	up	---	---	---	gb:AI008697 /DB_XREF=gi:3222529 /DB_XREF=EST203148 /CLONE=REMBB77 /FEA=EST /CNT=20 /TID=Rn.13571.1 /TIER=Stack /STK=16 /UG=Rn.13571 /UG_TITLE=ESTs, Highly similar to ACES RAT ACETYLCHOLINESTERASE PRECURSOR (R.norvegicus)	AI008697	---
1371845_PM_at	0.00237257	1.15672	down	Pop4	processing of precursor 4, ribonuclease P/MRP subunit (S. cerevisiae)	292831	gb:BF287209 /DB_XREF=gi:11218265 /DB_XREF=EST451786 /CLONE=RGIFZ94 /FEA=EST /CNT=24 /TID=Rn.3013.1 /TIER=Stack /STK=15 /UG=Rn.3013 /UG_TITLE=ESTs, Moderately similar to RP29_HUMAN RIBONUCLEASE P PROTEIN SUBUNIT P29 (H.sapiens)	BF287209	---
1371853_PM_at	5.80356e-05	1.09816	down	Mrpl42	mitochondrial ribosomal protein L42	299743	gb:AI176602 /DB_XREF=gi:3727240 /DB_XREF=EST220191 /CLONE=ROVBU40 /FEA=EST /CNT=20 /TID=Rn.11.1 /TIER=Stack /STK=15 /UG=Rn.11 /UG_TITLE=ESTs, Moderately similar to PTD007 (H.sapiens)	AI176602	---
1371862_PM_at	0.0219631	1.07699	down	Rrm1	ribonucleotide reductase M1	685579	gb:AI412015 /DB_XREF=gi:4255519 /DB_XREF=EST240309 /CLONE=RKIEJ47 /FEA=EST /CNT=19 /TID=Rn.22094.1 /TIER=Stack /STK=15 /UG=Rn.22094 /UG_TITLE=ESTs, Highly similar to A24050 ribonucleoside-diphosphate reductase (M.musculus)	AI412015	---
1371899_PM_at	0.0171027	1.05201	down	Prkra	protein kinase, interferon inducible double stranded RNA dependent activator	311130	gb:AI102009 /DB_XREF=gi:3706844 /DB_XREF=EST211298 /CLONE=RBRBX88 /FEA=EST /CNT=17 /TID=Rn.3217.1 /TIER=Stack /STK=15 /UG=Rn.3217 /UG_TITLE=ESTs, Weakly similar to TRBP MOUSE PROTAMINE-1 RNA BINDING PROTEIN (M.musculus)	AI102009	ENSRNOG00000011195
1371902_PM_at	0.0266234	1.18069	up	---	---	---	gb:AI227832 /DB_XREF=gi:3811719 /DB_XREF=EST224527 /CLONE=RBRCM31 /FEA=EST /CNT=20 /TID=Rn.6337.1 /TIER=Stack /STK=15 /UG=Rn.6337 /UG_TITLE=ESTs	AI227832	ENSRNOG00000031097
1371922_PM_at	0.0216817	1.24843	down	Car12	Carbonic anyhydrase 12	363085	gb:AI169140 /DB_XREF=gi:4134369 /DB_XREF=EST214974 /CLONE=RKIBO03 /FEA=EST /CNT=17 /TID=Rn.18638.1 /TIER=Stack /STK=15 /UG=Rn.18638 /UG_TITLE=ESTs	AI169140	---
1371931_PM_at	0.0427981	1.06532	up	Gtf2i	general transcription factor II I	353256	gb:BI274753 /DB_XREF=gi:14885975 /DB_XREF=UI-R-CX0-bxd-f-05-0-UI.s1 /CLONE=UI-R-CX0-bxd-f-05-0-UI /FEA=EST /CNT=15 /TID=Rn.19685.1 /TIER=Stack /STK=15 /UG=Rn.19685 /UG_TITLE=ESTs	BI274753	ENSRNOG00000001479
1371936_PM_at	0.03265	1.06355	down	Eif4a1	eukaryotic translation initiation factor 4A1	287436	gb:BI284436 /DB_XREF=gi:14937114 /DB_XREF=UI-R-CX0s-ccr-a-12-0-UI.s1 /CLONE=UI-R-CX0s-ccr-a-12-0-UI /FEA=EST /CNT=51 /TID=Rn.1342.1 /TIER=Stack /STK=14 /UG=Rn.1342 /UG_TITLE=ESTs, Weakly similar to HE47 RAT PROBABLE ATP-DEPENDENT RNA HELICASE P47 (R.norvegicus)	BI284436	ENSRNOG00000030628
1371945_PM_at	0.0401388	1.06728	up	Ube2l3	ubiquitin-conjugating enzyme E2L 3	363836	gb:AI407788 /DB_XREF=gi:4251292 /DB_XREF=EST236078 /CLONE=ROVEC43 /FEA=EST /CNT=60 /TID=Rn.54778.1 /TIER=Stack /STK=9 /UG=Rn.54778 /UG_TITLE=ESTs, Weakly similar to ubiquitin-conjugating enzyme E2D 2 (Rattus norvegicus) (R.norvegicus)	AI407788	ENSRNOG00000001862
1371948_PM_at	0.00145236	1.10486	down	Pigp	phosphatidylinositol glycan anchor biosynthesis, class P	288238	gb:BF415030 /DB_XREF=gi:11403019 /DB_XREF=UI-R-BJ2-boy-h-02-0-UI.s1 /CLONE=UI-R-BJ2-boy-h-02-0-UI /FEA=EST /CNT=22 /TID=Rn.8122.1 /TIER=Stack /STK=14 /UG=Rn.8122 /UG_TITLE=ESTs, Highly similar to JC7301 Down syndrome critical region protein 5 alpha (H.sapiens)	BF415030	ENSRNOG00000039850
1371950_PM_at	0.032766	1.11557	down	Pdzd11	PDZ domain containing 11	302422	gb:AI008961 /DB_XREF=gi:3222793 /DB_XREF=EST203412 /CLONE=REMBG18 /FEA=EST /CNT=25 /TID=Rn.3541.1 /TIER=Stack /STK=14 /UG=Rn.3541 /UG_TITLE=ESTs, Weakly similar to SP93 RAT CHANNEL ASSOCIATED PROTEIN OF SYNAPSE-110 (R.norvegicus)	AI008961	ENSRNOG00000002838
1371956_PM_at	0.039926	1.09453	up	LOC683077	similar to praja1, RING-H2 motif containing	683077	gb:BG372686 /DB_XREF=gi:13269223 /DB_XREF=UI-R-CV1-brz-d-03-0-UI.s1 /CLONE=UI-R-CV1-brz-d-03-0-UI /FEA=EST /CNT=26 /TID=Rn.3523.1 /TIER=Stack /STK=14 /UG=Rn.3523 /UG_TITLE=ESTs, Moderately similar to neurodegeneration-associated protein 1 (R.norvegicus)	BG372686	---
1371963_PM_at	0.0415506	1.12262	down	Pcca	propionyl-coenzyme A carboxylase, alpha polypeptide	687008	gb:BF395042 /DB_XREF=gi:11380003 /DB_XREF=UI-R-CM0-bji-a-05-0-UI.s1 /CLONE=UI-R-CM0-bji-a-05-0-UI /FEA=EST /CNT=19 /TID=Rn.6033.1 /TIER=Stack /STK=14 /UG=Rn.6033 /UG_TITLE=ESTs, Moderately similar to alpha-propionyl-CoA carboxylase (R.norvegicus)	BF395042	---
1371967_PM_at	0.0262518	1.09503	down	Mrpl16	mitochondrial ribosomal protein L16	293754	gb:AI410349 /DB_XREF=gi:4253853 /DB_XREF=EST238642 /CLONE=RKIDN41 /FEA=EST /CNT=24 /TID=Rn.7460.1 /TIER=Stack /STK=14 /UG=Rn.7460 /UG_TITLE=ESTs, Weakly similar to T12688 hypothetical protein 63B12.2 - fruit fly (D.melanogaster)	AI410349	ENSRNOG00000021005
1371982_PM_at	0.00386505	1.12028	down	Dpy30	dpy-30 homolog (C. elegans)	286897	gb:AI411960 /DB_XREF=gi:4255464 /DB_XREF=EST240254 /CLONE=RKIER72 /FEA=EST /CNT=19 /TID=Rn.3297.1 /TIER=Stack /STK=14 /UG=Rn.3297 /UG_TITLE=ESTs, Highly similar to DP30_MOUSE Dpy-30-like protein (M.musculus)	AI411960	ENSRNOG00000027126
1371999_PM_at	0.0495487	1.15221	down	---	---	---	gb:BI303641 /DB_XREF=gi:14979921 /DB_XREF=UI-R-DQ0-cja-l-02-0-UI.s1 /CLONE=UI-R-DQ0-cja-l-02-0-UI /FEA=EST /CNT=17 /TID=Rn.22812.1 /TIER=Stack /STK=14 /UG=Rn.22812 /UG_TITLE=ESTs	BI303641	---
1372003_PM_at	0.0414167	1.08721	down	---	---	---	gb:BI296755 /DB_XREF=gi:14961499 /DB_XREF=UI-R-CV2-cgv-h-10-0-UI.s1 /CLONE=UI-R-CV2-cgv-h-10-0-UI /FEA=EST /CNT=17 /TID=Rn.17235.1 /TIER=Stack /STK=14 /UG=Rn.17235 /UG_TITLE=ESTs	BI296755	---
1372019_PM_at	0.0481378	1.08729	down	Med10	mediator complex subunit 10	290939	gb:AI231789 /DB_XREF=gi:3815669 /DB_XREF=EST228477 /CLONE=RHECO30 /FEA=EST /CNT=17 /TID=Rn.1773.1 /TIER=Stack /STK=14 /UG=Rn.1773 /UG_TITLE=ESTs, Weakly similar to T24720 hypothetical protein T09A5.6 - Caenorhabditis elegans (C.elegans)	AI231789	ENSRNOG00000017150
1372052_PM_at	0.0241954	1.05329	down	Bub3	budding uninhibited by benzimidazoles 3 homolog (S. cerevisiae)	361662	gb:BI275918 /DB_XREF=gi:14920324 /DB_XREF=UI-R-CX0-bxi-a-08-0-UI.s1 /CLONE=UI-R-CX0-bxi-a-08-0-UI /FEA=EST /CNT=14 /TID=Rn.6897.1 /TIER=Stack /STK=14 /UG=Rn.6897 /UG_TITLE=ESTs, Highly similar to budding uninhibited by benzimidazoles 3 homolog (S. cerevisiae) (Mus musculus) (M.musculus)	BI275918	---
1372063_PM_at	0.0345162	1.12536	up	---	---	---	gb:BG377807 /DB_XREF=gi:13302279 /DB_XREF=UI-R-CU0-bvf-d-06-0-UI.s1 /CLONE=UI-R-CU0-bvf-d-06-0-UI /FEA=EST /CNT=14 /TID=Rn.29851.1 /TIER=Stack /STK=14 /UG=Rn.29851 /UG_TITLE=ESTs	BG377807	---
1372064_PM_at	0.0283922	1.12657	down	Cxcl16	chemokine (C-X-C motif) ligand 16	497942	gb:BI296385 /DB_XREF=gi:14960757 /DB_XREF=UI-R-DK0-cez-g-05-0-UI.s1 /CLONE=UI-R-DK0-cez-g-05-0-UI /FEA=EST /CNT=24 /TID=Rn.7070.1 /TIER=Stack /STK=13 /UG=Rn.7070 /UG_TITLE=ESTs	BI296385	ENSRNOG00000026647
1372066_PM_at	0.00329923	1.13923	down	Fam103a1	family with sequence similarity 103, member A1	293058	gb:AI170703 /DB_XREF=gi:3710743 /DB_XREF=EST216639 /CLONE=RMUBA20 /FEA=EST /CNT=25 /TID=Rn.4307.1 /TIER=Stack /STK=13 /UG=Rn.4307 /UG_TITLE=ESTs	AI170703	ENSRNOG00000019426
1372068_PM_at	0.0413209	1.10567	up	Zmynd11	zinc finger, MYND domain containing 11	291259	gb:BI289543 /DB_XREF=gi:14947222 /DB_XREF=UI-R-DK0-cff-c-09-0-UI.s1 /CLONE=UI-R-DK0-cff-c-09-0-UI /FEA=EST /CNT=29 /TID=Rn.1855.1 /TIER=Stack /STK=13 /UG=Rn.1855 /UG_TITLE=ESTs	BI289543	---
1372072_PM_at	0.04292	1.32702	down	Hdhd2	haloacid dehalogenase-like hydrolase domain containing 2	361351	gb:BI282268 /DB_XREF=gi:14932867 /DB_XREF=UI-R-CU0s-cby-e-12-0-UI.s1 /CLONE=UI-R-CU0s-cby-e-12-0-UI /FEA=EST /CNT=26 /TID=Rn.4254.1 /TIER=Stack /STK=13 /UG=Rn.4254 /UG_TITLE=ESTs, Weakly similar to T25806 hypothetical protein K08B12.3 - Caenorhabditis elegans (C.elegans)	BI282268	ENSRNOG00000018006
1372077_PM_at	0.0241788	1.06001	down	Strap	serine/threonine kinase receptor associated protein	297699	gb:AI009198 /DB_XREF=gi:3223030 /DB_XREF=EST203649 /CLONE=REMBK79 /FEA=EST /CNT=36 /TID=Rn.8126.1 /TIER=Stack /STK=13 /UG=Rn.8126 /UG_TITLE=ESTs, Highly similar to UNRI_MOUSE UNR-INTERACTING PROTEIN (SERINE-THREONINE KINASE RECEPTOR-ASSOCIATED PROTEIN) (M.musculus)	AI009198	ENSRNOG00000007134
1372083_PM_at	0.0436725	1.06824	down	Polr2b	polymerase (RNA) II (DNA directed) polypeptide B, 140kDa	289561	gb:BI289658 /DB_XREF=gi:14947446 /DB_XREF=UI-R-DK0-cfi-f-02-0-UI.s1 /CLONE=UI-R-DK0-cfi-f-02-0-UI /FEA=EST /CNT=20 /TID=Rn.1620.2 /TIER=Stack /STK=13 /UG=Rn.1620 /UG_TITLE=ESTs, Weakly similar to RNA polymerase I (127 kDa subunit) (Rattus norvegicus) (R.norvegicus)	BI289658	ENSRNOG00000024779
1372087_PM_at	0.0376816	1.11159	down	Iah1	isoamyl acetate-hydrolyzing esterase 1 homolog (S. cerevisiae)	298917	gb:BG666916 /DB_XREF=gi:13888838 /DB_XREF=DRACQE01 /CLONE=DRACQE01 /FEA=EST /CNT=20 /TID=Rn.8209.1 /TIER=Stack /STK=13 /UG=Rn.8209 /UG_TITLE=ESTs, Weakly similar to S49911 hypothetical protein YOR126c - yeast (Saccharomyces cerevisiae) (S.cerevisiae)	BG666916	ENSRNOG00000007379
1372093_PM_at	0.0260494	1.1004	up	Mxi1	MAX interactor 1	25701	gb:AI409308 /DB_XREF=gi:4252812 /DB_XREF=EST237600 /CLONE=RKIDM41 /FEA=EST /CNT=19 /TID=Rn.1297.1 /TIER=Stack /STK=13 /UG=Rn.1297 /UG_TITLE=ESTs, Moderately similar to MXI1 RAT MAX INTERACTING PROTEIN 1 (R.norvegicus)	AI409308	ENSRNOG00000034078
1372098_PM_at	0.0349796	1.16887	down	Tmem141	transmembrane protein 141	499755	gb:AI172092 /DB_XREF=gi:3712132 /DB_XREF=EST218087 /CLONE=RMUBU82 /FEA=EST /CNT=18 /TID=Rn.7447.1 /TIER=Stack /STK=13 /UG=Rn.7447 /UG_TITLE=ESTs	AI172092	---
1372108_PM_at	0.0454208	1.06915	down	Ptcd3	Pentatricopeptide repeat domain 3	500199	gb:BE098359 /DB_XREF=gi:8490222 /DB_XREF=UI-R-BJ1-asy-g-04-0-UI.s1 /CLONE=UI-R-BJ1-asy-g-04-0-UI /FEA=EST /CNT=18 /TID=Rn.3598.1 /TIER=Stack /STK=13 /UG=Rn.3598 /UG_TITLE=ESTs	BE098359	ENSRNOG00000009484
1372118_PM_at	0.0483653	1.23944	up	Nsg2	neuron specific gene family member 2	497878	gb:BI281674 /DB_XREF=gi:14931649 /DB_XREF=UI-R-CT0s-cav-b-08-0-UI.s1 /CLONE=UI-R-CT0s-cav-b-08-0-UI /FEA=EST /CNT=28 /TID=Rn.14657.1 /TIER=Stack /STK=13 /UG=Rn.14657 /UG_TITLE=ESTs	BI281674	ENSRNOG00000020644
1372147_PM_at	0.0312653	1.05917	down	Ndufs4	NADH dehydrogenase (ubiquinone) Fe-S protein 4	499529	gb:BM387802 /DB_XREF=gi:18187855 /DB_XREF=UI-R-CN1-cjk-i-24-0-UI.s1 /CLONE=UI-R-CN1-cjk-i-24-0-UI /FEA=EST /CNT=21 /TID=Rn.6543.1 /TIER=Stack /STK=13 /UG=Rn.6543 /UG_TITLE=ESTs, Highly similar to NUYM_HUMAN NADH-UBIQUINONE OXIDOREDUCTASE 18 KD SUBUNIT PRECURSOR (H.sapiens)	BM387802	---
1372148_PM_at	0.0128622	1.15282	down	Commd2	COMM domain containing 2	688478	gb:BI281210 /DB_XREF=gi:14930714 /DB_XREF=UI-R-CT0s-cat-f-07-0-UI.s1 /CLONE=UI-R-CT0s-cat-f-07-0-UI /FEA=EST /CNT=18 /TID=Rn.4168.1 /TIER=Stack /STK=13 /UG=Rn.4168 /UG_TITLE=ESTs	BI281210	ENSRNOG00000016941
1372154_PM_at	0.0241594	1.05191	down	RGD1359616	similar to 2010321M09Rik protein	300782	gb:AW521019 /DB_XREF=gi:7163397 /DB_XREF=UI-R-BJ0p-agi-b-05-0-UI.s1 /CLONE=UI-R-BJ0p-agi-b-05-0-UI /FEA=EST /CNT=15 /TID=Rn.9525.1 /TIER=Stack /STK=13 /UG=Rn.9525 /UG_TITLE=ESTs	AW521019	ENSRNOG00000012469
1372167_PM_at	0.00954962	1.12	down	Snrpg	small nuclear ribonucleoprotein polypeptide G	681031	gb:AW525656 /DB_XREF=gi:7168041 /DB_XREF=UI-R-BJ0p-aiu-c-08-0-UI.s1 /CLONE=UI-R-BJ0p-aiu-c-08-0-UI /FEA=EST /CNT=15 /TID=Rn.8527.1 /TIER=Stack /STK=13 /UG=Rn.8527 /UG_TITLE=ESTs, Highly similar to RUXG_HUMAN SMALL NUCLEAR RIBONUCLEOPROTEIN G (H.sapiens)	AW525656	---
1372172_PM_at	0.0128722	1.14052	down	Nphp1	nephronophthisis 1 (juvenile) homolog (human)	296136	gb:BM386289 /DB_XREF=gi:18186342 /DB_XREF=UI-R-CN1-cjf-d-13-0-UI.s1 /CLONE=UI-R-CN1-cjf-d-13-0-UI /FEA=EST /CNT=16 /TID=Rn.23621.1 /TIER=Stack /STK=13 /UG=Rn.23621 /UG_TITLE=ESTs, Moderately similar to T08855 nephrocystin (H.sapiens)	BM386289	ENSRNOG00000015756
1372192_PM_at	0.0295848	1.16188	down	---	---	---	gb:AI145385 /DB_XREF=gi:3667184 /DB_XREF=UI-R-BT0-qe-d-08-0-UI.s1 /CLONE=UI-R-BT0-qe-d-08-0-UI /FEA=EST /CNT=14 /TID=Rn.3580.1 /TIER=Stack /STK=13 /UG=Rn.3580 /UG_TITLE=ESTs	AI145385	---
1372199_PM_at	0.010663	1.13127	up	Pink1	PTEN induced putative kinase 1	298575	gb:AI233191 /DB_XREF=gi:3817071 /DB_XREF=EST229879 /CLONE=RKIDC02 /FEA=EST /CNT=14 /TID=Rn.7298.1 /TIER=Stack /STK=13 /UG=Rn.7298 /UG_TITLE=ESTs, Weakly similar to YQO9_CAEEL Hypothetical 141.2 kDa protein EEED8.9 in chromosome II (C.elegans)	AI233191	ENSRNOG00000015385
1372200_PM_at	0.0415508	1.16334	up	Gpsm3	G-protein signaling modulator 3 (AGS3-like, C. elegans)	406163	gb:BI273727 /DB_XREF=gi:14883968 /DB_XREF=UI-R-CW0-bvy-d-02-0-UI.s1 /CLONE=UI-R-CW0-bvy-d-02-0-UI /FEA=EST /CNT=14 /TID=Rn.7475.1 /TIER=Stack /STK=13 /UG=Rn.7475 /UG_TITLE=ESTs	BI273727	ENSRNOG00000000441
1372209_PM_at	0.00546099	1.07066	down	Cops5	COP9 constitutive photomorphogenic homolog subunit 5 (Arabidopsis)	312916	gb:AI105072 /DB_XREF=gi:3709251 /DB_XREF=EST214361 /CLONE=RHECN29 /FEA=EST /CNT=21 /TID=Rn.2243.1 /TIER=Stack /STK=13 /UG=Rn.2243 /UG_TITLE=ESTs, Highly similar to S71820 JUN-activation-domain-binding protein 1 (H.sapiens)	AI105072	ENSRNOG00000006499
1372221_PM_at	0.0120896	1.14298	up	---	---	---	gb:BM389079 /DB_XREF=gi:18189132 /DB_XREF=UI-R-DZ0-cko-n-09-0-UI.s1 /CLONE=UI-R-DZ0-cko-n-09-0-UI /FEA=EST /CNT=13 /TID=Rn.3323.1 /TIER=Stack /STK=13 /UG=Rn.3323 /UG_TITLE=ESTs	BM389079	---
1372248_PM_at	0.0391034	1.10629	up	Sesn1	sestrin 1	294518	gb:AI411742 /DB_XREF=gi:4255246 /DB_XREF=EST240036 /CLONE=RPLDJ90 /FEA=EST /CNT=20 /TID=Rn.17204.1 /TIER=Stack /STK=12 /UG=Rn.17204 /UG_TITLE=ESTs	AI411742	ENSRNOG00000000302
1372269_PM_at	0.0047585	1.09788	down	Med6	mediator complex subunit 6	299180	gb:AI229534 /DB_XREF=gi:3813421 /DB_XREF=EST226229 /CLONE=REMCH86 /FEA=EST /CNT=19 /TID=Rn.12960.1 /TIER=Stack /STK=12 /UG=Rn.12960 /UG_TITLE=ESTs, Weakly similar to T37473 transcription regulation mediator c-MED6 - Caenorhabditis elegans (C.elegans)	AI229534	ENSRNOG00000006976
1372281_PM_at	0.00166604	1.13279	down	Lyplal1	lysophospholipase-like 1	289357	gb:AA819059 /DB_XREF=gi:4227724 /DB_XREF=UI-R-A0-ba-h-04-0-UI.s1 /CLONE=UI-R-A0-ba-h-04-0-UI /FEA=EST /CNT=16 /TID=Rn.1612.1 /TIER=Stack /STK=12 /UG=Rn.1612 /UG_TITLE=ESTs, Weakly similar to B Chain B, Crystal Structure Of The Human Acyl Protein Thioesterase 1 At 1.5 A Resolutio (H.sapiens)	AA819059	ENSRNOG00000023130
1372282_PM_at	0.0227453	1.0662	down	Gpx8	glutathione peroxidase 8	294744	gb:BF283238 /DB_XREF=gi:11214308 /DB_XREF=EST447829 /CLONE=RGIDZ22 /FEA=EST /CNT=16 /TID=Rn.17558.1 /TIER=Stack /STK=12 /UG=Rn.17558 /UG_TITLE=ESTs, Weakly similar to GSHH RAT PHOSPHOLIPID HYDROPEROXIDE GLUTATHIONE PEROXIDASE (R.norvegicus)	BF283238	ENSRNOG00000010461
1372286_PM_at	0.000216386	1.09304	down	Tspan6	tetraspanin 6	302313	gb:BI295929 /DB_XREF=gi:14959866 /DB_XREF=UI-R-DK0-cfc-d-08-0-UI.s1 /CLONE=UI-R-DK0-cfc-d-08-0-UI /FEA=EST /CNT=17 /TID=Rn.20318.1 /TIER=Stack /STK=12 /UG=Rn.20318 /UG_TITLE=ESTs, Weakly similar to CD63 RAT CD63 ANTIGEN (R.norvegicus)	BI295929	ENSRNOG00000003786
1372299_PM_at	0.0116372	1.09395	up	Cdkn1c	cyclin-dependent kinase inhibitor 1C (P57)	246060	gb:AI013919 /DB_XREF=gi:4133944 /DB_XREF=EST208594 /CLONE=RSPBZ47 /FEA=EST /CNT=27 /TID=Rn.12256.1 /TIER=Stack /STK=12 /UG=Rn.12256 /UG_TITLE=ESTs, Moderately similar to CDNC MOUSE CYCLIN-DEPENDENT KINASE INHIBITOR 1C (M.musculus)	AI013919	---
1372317_PM_at	0.0477373	1.15958	up	Ehd1	EH-domain containing 1	293692	gb:AI177867 /DB_XREF=gi:3728505 /DB_XREF=EST221516 /CLONE=RPLCH61 /FEA=EST /CNT=14 /TID=Rn.25098.1 /TIER=Stack /STK=12 /UG=Rn.25098 /UG_TITLE=ESTs, Weakly similar to EPIDERMAL GROWTH FACTOR RECEPTOR SUBSTRATE SUBSTRATE 15 (M.musculus)	AI177867	---
1372320_PM_at	0.00729599	1.08443	down	Msl3l1	male-specific lethal 3-like 1 (Drosophila)	317464	gb:BE103894 /DB_XREF=gi:8495994 /DB_XREF=UI-R-BX0-arj-b-06-0-UI.s1 /CLONE=UI-R-BX0-arj-b-06-0-UI /FEA=EST /CNT=14 /TID=Rn.7258.1 /TIER=Stack /STK=12 /UG=Rn.7258 /UG_TITLE=ESTs, Highly similar to T08795 hypothetical protein DKFZp586J1822.1 (H.sapiens)	BE103894	ENSRNOG00000004016
1372324_PM_at	0.0224704	1.11341	down	Znhit3	zinc finger, HIT type 3	497975	gb:AW253391 /DB_XREF=gi:6596982 /DB_XREF=UI-R-BJ0-aen-d-03-0-UI.s1 /CLONE=UI-R-BJ0-aen-d-03-0-UI /FEA=EST /CNT=14 /TID=Rn.17552.1 /TIER=Stack /STK=12 /UG=Rn.17552 /UG_TITLE=ESTs, Moderately similar to TRI3_HUMAN THYROID RECEPTOR INTERACTING PROTEIN 3 (H.sapiens)	AW253391	ENSRNOG00000027818
1372326_PM_at	0.0362961	1.14045	down	Slc2a3	Solute carrier family 2 (facilitated glucose transporter), member 3	25551	gb:AA901341 /DB_XREF=gi:4233842 /DB_XREF=UI-R-A1-dw-b-04-0-UI.s1 /CLONE=UI-R-A1-dw-b-04-0-UI /FEA=EST /CNT=14 /TID=Rn.3398.1 /TIER=Stack /STK=12 /UG=Rn.3398 /UG_TITLE=ESTs, Highly similar to alpha-2,6-sialyltransferase (M.musculus)	AA901341	---
1372340_PM_at	0.0261379	1.09098	down	MGC94725///Mat2b	methionine adenosyltransferase II, beta /// similar to methionine adenosyltransferase II, beta	689330///683630	gb:BM386355 /DB_XREF=gi:18186408 /DB_XREF=UI-R-CN1-cjf-b-06-0-UI.s1 /CLONE=UI-R-CN1-cjf-b-06-0-UI /FEA=EST /CNT=19 /TID=Rn.1752.1 /TIER=Stack /STK=12 /UG=Rn.1752 /UG_TITLE=ESTs	BM386355	---
1372343_PM_at	0.0341299	1.09324	down	Exosc8	exosome component 8	295050	gb:BM384065 /DB_XREF=gi:18184118 /DB_XREF=UI-R-DZ0-cks-i-20-0-UI.s1 /CLONE=UI-R-DZ0-cks-i-20-0-UI /FEA=EST /CNT=16 /TID=Rn.13177.1 /TIER=Stack /STK=12 /UG=Rn.13177 /UG_TITLE=ESTs, Weakly similar to PMC1_MOUSE POLYMYOSITISSCLERODERMA AUTOANTIGEN 1 (AUTOANTIGEN PMSCL 1) (POLYMYOSITISSCLERODERMA AUTOANTIGEN 75 KDA) (PMSCL-75) (P75 POLYMYOSITIS-SCLERODERMA OVERLAP SYNDROME ASSOCIATED AUTOANTIGEN) (M.…	BM384065	ENSRNOG00000013434
1372362_PM_at	0.0266767	1.07253	down	Galk2	galactokinase 2	296117	gb:BE329241 /DB_XREF=gi:9203017 /DB_XREF=hq38g07.x1 /CLONE=IMAGE:3121692 /FEA=EST /CNT=13 /TID=Rn.2937.1 /TIER=Stack /STK=12 /UG=Rn.2937 /UG_TITLE=ESTs, Weakly similar to GAL1_MOUSE GALACTOKINASE (GALACTOSE KINASE) (M.musculus)	BE329241	ENSRNOG00000009289
1372437_PM_at	0.00573911	1.09329	down	Skp1	S-phase kinase-associated protein 1	287280	gb:BM390921 /DB_XREF=gi:18190974 /DB_XREF=UI-R-CN1-cjp-m-13-0-UI.s1 /CLONE=UI-R-CN1-cjp-m-13-0-UI /FEA=EST /CNT=81 /TID=Rn.3477.1 /TIER=Stack /STK=11 /UG=Rn.3477 /UG_TITLE=ESTs, Highly similar to 2120310B RNA polymerase II elongation factor (M.musculus)	BM390921	---
1372446_PM_at	0.0236536	1.06912	down	Ppp1r2	protein phosphatase 1, regulatory (inhibitor) subunit 2	192361	gb:AI172276 /DB_XREF=gi:3712316 /DB_XREF=EST218277 /CLONE=RMUBX23 /FEA=EST /CNT=21 /TID=Rn.4016.1 /TIER=Stack /STK=11 /UG=Rn.4016 /UG_TITLE=ESTs	AI172276	ENSRNOG00000001733
1372447_PM_at	0.046883	1.11707	up	Fgfr1	Fibroblast growth factor receptor 1	79114	gb:BI275155 /DB_XREF=gi:14886727 /DB_XREF=UI-R-CX0-bxc-c-02-0-UI.s1 /CLONE=UI-R-CX0-bxc-c-02-0-UI /FEA=EST /CNT=19 /TID=Rn.15098.1 /TIER=Stack /STK=11 /UG=Rn.15098 /UG_TITLE=ESTs	BI275155	ENSRNOG00000016050
1372456_PM_at	0.0114133	1.16665	down	Mrps31	mitochondrial ribosomal protein S31	290850	gb:AI171229 /DB_XREF=gi:3711269 /DB_XREF=EST217184 /CLONE=RMUBH85 /FEA=EST /CNT=19 /TID=Rn.22173.1 /TIER=Stack /STK=11 /UG=Rn.22173 /UG_TITLE=ESTs	AI171229	ENSRNOG00000011839
1372458_PM_at	0.0319215	1.09764	up	Setd8	SET domain containing (lysine methyltransferase) 8	689820	gb:AI235220 /DB_XREF=gi:4136064 /DB_XREF=EST231782 /CLONE=ROVCP07 /FEA=EST /CNT=18 /TID=Rn.13296.1 /TIER=Stack /STK=11 /UG=Rn.13296 /UG_TITLE=ESTs, Weakly similar to All-1 protein +GTE form (M.musculus)	AI235220	ENSRNOG00000001062
1372491_PM_at	0.000337915	1.21866	up	RGD1565591	similar to Ski protein	313757	gb:AI229647 /DB_XREF=gi:3813534 /DB_XREF=EST226342 /CLONE=REMCJ89 /FEA=EST /CNT=15 /TID=Rn.8311.1 /TIER=Stack /STK=11 /UG=Rn.8311 /UG_TITLE=ESTs	AI229647	ENSRNOG00000015007
1372496_PM_at	0.0179202	1.17415	down	Fdx1l	ferredoxin 1-like	313786	gb:BG371538 /DB_XREF=gi:13268075 /DB_XREF=UI-R-CW0-bvw-e-11-0-UI.s1 /CLONE=UI-R-CW0-bvw-e-11-0-UI /FEA=EST /CNT=15 /TID=Rn.15041.1 /TIER=Stack /STK=11 /UG=Rn.15041 /UG_TITLE=ESTs, Weakly similar to JC4538 adrenodoxin precursor - rat (R.norvegicus)	BG371538	---
1372519_PM_at	0.00800274	1.06996	down	Nup93	nucleoporin 93kDa	291874	gb:AI169375 /DB_XREF=gi:3705683 /DB_XREF=EST215219 /CLONE=RKIBR45 /FEA=EST /CNT=15 /TID=Rn.24203.1 /TIER=Stack /STK=11 /UG=Rn.24203 /UG_TITLE=ESTs	AI169375	ENSRNOG00000018564
1372531_PM_at	0.0047479	1.13893	down	Ppfibp2	PTPRF interacting protein, binding protein 2 (liprin beta 2)	308918	gb:BE106488 /DB_XREF=gi:8498590 /DB_XREF=UI-R-BO1-aso-e-12-0-UI.s1 /CLONE=UI-R-BO1-aso-e-12-0-UI /FEA=EST /CNT=14 /TID=Rn.2971.1 /TIER=Stack /STK=11 /UG=Rn.2971 /UG_TITLE=ESTs, Weakly similar to S55553 LAR-interacting protein LIP1b (H.sapiens)	BE106488	---
1372534_PM_at	0.00137418	1.19116	down	---	---	---	gb:AW434092 /DB_XREF=gi:6965399 /DB_XREF=UI-R-BJ0p-afd-b-09-0-UI.s1 /CLONE=UI-R-BJ0p-afd-b-09-0-UI /FEA=EST /CNT=14 /TID=Rn.3540.1 /TIER=Stack /STK=11 /UG=Rn.3540 /UG_TITLE=ESTs, Highly similar to RPCX MOUSE DNA-DIRECTED RNA POLYMERASES I, II, AND III 7.0 KD POLYPEPTIDE (M.musculus)	AW434092	---
1372540_PM_at	0.0440413	1.12944	down	Ublcp1	ubiquitin-like domain containing CTD phosphatase 1	360514	gb:BG671872 /DB_XREF=gi:13893971 /DB_XREF=DRNBZA06 /CLONE=DRNBZA06 /FEA=EST /CNT=18 /TID=Rn.34113.1 /TIER=Stack /STK=11 /UG=Rn.34113 /UG_TITLE=ESTs	BG671872	ENSRNOG00000004477
1372543_PM_at	0.00788531	1.17203	down	RGD1562502	similar to RIKEN cDNA 2610029G23	363485	gb:BI282107 /DB_XREF=gi:14932523 /DB_XREF=UI-R-CU0s-cbw-f-05-0-UI.s1 /CLONE=UI-R-CU0s-cbw-f-05-0-UI /FEA=EST /CNT=17 /TID=Rn.12007.1 /TIER=Stack /STK=11 /UG=Rn.12007 /UG_TITLE=ESTs, Weakly similar to Y54E5A.5.p (Caenorhabditis elegans) (C.elegans)	BI282107	ENSRNOG00000002662
1372547_PM_at	0.0251175	1.09904	down	RGD1306583	similar to RIKEN cDNA 2410002O22 gene	294709	gb:AI175034 /DB_XREF=gi:4134761 /DB_XREF=EST218552 /CLONE=RMUCB34 /FEA=EST /CNT=15 /TID=Rn.15285.1 /TIER=Stack /STK=11 /UG=Rn.15285 /UG_TITLE=ESTs, Weakly similar to C56C10.7.p (Caenorhabditis elegans) (C.elegans)	AI175034	ENSRNOG00000012124
1372557_PM_at	0.00646133	1.09108	down	Arl6	ADP-ribosylation factor-like 6	363760	gb:AI409182 /DB_XREF=gi:4252686 /DB_XREF=EST237474 /CLONE=RKIDO26 /FEA=EST /CNT=13 /TID=Rn.22421.1 /TIER=Stack /STK=11 /UG=Rn.22421 /UG_TITLE=ESTs, Weakly similar to ARF3_HUMAN ADP-RIBOSYLATION FACTOR (R.norvegicus)	AI409182	ENSRNOG00000001689
1372611_PM_at	0.0431221	1.16307	down	RGD1305274	similar to RIKEN cDNA 2010305A19	298377	gb:BM384497 /DB_XREF=gi:18184550 /DB_XREF=UI-R-CN1-cjs-o-09-0-UI.s2 /CLONE=UI-R-CN1-cjs-o-09-0-UI /FEA=EST /CNT=12 /TID=Rn.21005.1 /TIER=Stack /STK=11 /UG=Rn.21005 /UG_TITLE=ESTs, Weakly similar to T27773 hypothetical protein ZK20.4 - Caenorhabditis elegans (C.elegans)	BM384497	ENSRNOG00000010636
1372612_PM_at	0.0347715	1.1265	up	Dynll2	dynein light chain LC8-type 2	140734	gb:BG372973 /DB_XREF=gi:13269510 /DB_XREF=UI-R-CV1-bsb-a-11-0-UI.s1 /CLONE=UI-R-CV1-bsb-a-11-0-UI /FEA=EST /CNT=12 /TID=Rn.16758.1 /TIER=Stack /STK=11 /UG=Rn.16758 /UG_TITLE=ESTs	BG372973	ENSRNOG00000008921
1372619_PM_at	0.00404633	1.18242	down	Mrpl49	mitochondrial ribosomal protein L49	309176	gb:AI172185 /DB_XREF=gi:3712225 /DB_XREF=EST218180 /CLONE=RMUBW01 /FEA=EST /CNT=12 /TID=Rn.22268.1 /TIER=Stack /STK=11 /UG=Rn.22268 /UG_TITLE=ESTs, Highly similar to NOF1 (H.sapiens)	AI172185	ENSRNOG00000020975
1372624_PM_at	0.034246	1.08128	up	Ano6	anoctamin 6	315272	gb:BF551377 /DB_XREF=gi:11661107 /DB_XREF=UI-R-C0-io-d-02-0-UI.r1 /CLONE=UI-R-C0-io-d-02-0-UI /FEA=EST /CNT=12 /TID=Rn.3350.1 /TIER=Stack /STK=11 /UG=Rn.3350 /UG_TITLE=ESTs	BF551377	---
1372639_PM_at	0.0360558	1.16332	down	Trim54	tripartite motif-containing 54	362708	gb:AA800245 /DB_XREF=gi:2863200 /DB_XREF=EST189742 /CLONE=RHEAM89 /FEA=EST /CNT=12 /TID=Rn.6303.1 /TIER=Stack /STK=11 /UG=Rn.6303 /UG_TITLE=ESTs, Weakly similar to T09013 RING finger protein Fxy - mouse (M.musculus)	AA800245	---
1372642_PM_at	0.00503376	1.23237	down	---	---	---	gb:BE113397 /DB_XREF=gi:8505502 /DB_XREF=UI-R-BJ1-awe-h-04-0-UI.s1 /CLONE=UI-R-BJ1-awe-h-04-0-UI /FEA=EST /CNT=12 /TID=Rn.13357.1 /TIER=Stack /STK=11 /UG=Rn.13357 /UG_TITLE=ESTs	BE113397	---
1372644_PM_at	0.0292873	1.11661	down	LOC686765	similar to CG14286-PA	686765	gb:BI282137 /DB_XREF=gi:14932583 /DB_XREF=UI-R-CU0s-cbx-a-06-0-UI.s1 /CLONE=UI-R-CU0s-cbx-a-06-0-UI /FEA=EST /CNT=15 /TID=Rn.2859.1 /TIER=Stack /STK=11 /UG=Rn.2859 /UG_TITLE=ESTs	BI282137	---
1372645_PM_at	0.0210138	1.1117	down	Parl	presenilin associated, rhomboid-like	287979	gb:AI233095 /DB_XREF=gi:3816975 /DB_XREF=EST229783 /CLONE=RKICK73 /FEA=EST /CNT=15 /TID=Rn.7053.1 /TIER=Stack /STK=11 /UG=Rn.7053 /UG_TITLE=ESTs, Weakly similar to YG2Q_YEAST HYPOTHETICAL 38.8 KD PROTEIN IN MIC1-SRB5 INTERGENIC REGION (S.cerevisiae)	AI233095	ENSRNOG00000023271
1372648_PM_at	0.00663922	1.14608	up	---	---	---	gb:BI291338 /DB_XREF=gi:14950784 /DB_XREF=UI-R-CV2-cgo-g-06-0-UI.s1 /CLONE=UI-R-CV2-cgo-g-06-0-UI /FEA=EST /CNT=13 /TID=Rn.25008.1 /TIER=Stack /STK=11 /UG=Rn.25008 /UG_TITLE=ESTs	BI291338	---
1372653_PM_at	0.00243945	1.1817	down	Fkbp11	FK506 binding protein 11	300211	gb:BI276210 /DB_XREF=gi:14920904 /DB_XREF=UI-R-CX0-bxf-d-05-0-UI.s1 /CLONE=UI-R-CX0-bxf-d-05-0-UI /FEA=EST /CNT=13 /TID=Rn.3241.1 /TIER=Stack /STK=11 /UG=Rn.3241 /UG_TITLE=ESTs, Highly similar to ARF3_HUMAN ADP-RIBOSYLATION FACTOR (R.norvegicus)	BI276210	ENSRNOG00000014566
1372665_PM_at	0.0210328	1.06924	down	Psat1	phosphoserine aminotransferase 1	293820	gb:AI230228 /DB_XREF=gi:3814115 /DB_XREF=EST226923 /CLONE=REMCT87 /FEA=EST /CNT=12 /TID=Rn.30218.1 /TIER=Stack /STK=11 /UG=Rn.30218 /UG_TITLE=ESTs, Weakly similar to SERC_HUMAN PHOSPHOSERINE AMINOTRANSFERASE (H.sapiens)	AI230228	ENSRNOG00000013971
1372667_PM_at	0.0115987	1.08643	down	RGD1359158	similar to RIKEN cDNA 1110059E24	361740	gb:AI170752 /DB_XREF=gi:3710792 /DB_XREF=EST216691 /CLONE=RMUBB04 /FEA=EST /CNT=11 /TID=Rn.16571.1 /TIER=Stack /STK=11 /UG=Rn.16571 /UG_TITLE=ESTs	AI170752	ENSRNOG00000027161
1372670_PM_at	0.0389021	1.10754	down	RGD1307682	similar to hypothetical protein FLJ21827	300675	gb:BI281686 /DB_XREF=gi:14931675 /DB_XREF=UI-R-CT0s-cav-c-08-0-UI.s1 /CLONE=UI-R-CT0s-cav-c-08-0-UI /FEA=EST /CNT=11 /TID=Rn.13688.1 /TIER=Stack /STK=11 /UG=Rn.13688 /UG_TITLE=ESTs	BI281686	ENSRNOG00000013919
1372685_PM_at	0.0255994	1.1178	down	Cdkn3	cyclin-dependent kinase inhibitor 3	289993	gb:BE113362 /DB_XREF=gi:8505467 /DB_XREF=UI-R-BJ1-awe-e-01-0-UI.s1 /CLONE=UI-R-BJ1-awe-e-01-0-UI /FEA=EST /CNT=11 /TID=Rn.25026.1 /TIER=Stack /STK=11 /UG=Rn.25026 /UG_TITLE=ESTs, Moderately similar to cyclin-dependent kinase inhibitor 3; CDK2-associated dual specificity phophatase; cyclin-dependent kinase interacting protein 2; kinase-associated phosphatase; cyclin-dependent kinase interactor 1 (…	BE113362	---
1372686_PM_at	0.040928	1.16613	down	Psmg4	proteasome (prosome, macropain) assembly chaperone 4	689623	gb:BE113476 /DB_XREF=gi:8505581 /DB_XREF=UI-R-BJ1-awl-g-06-0-UI.s1 /CLONE=UI-R-BJ1-awl-g-06-0-UI /FEA=EST /CNT=11 /TID=Rn.16672.1 /TIER=Stack /STK=11 /UG=Rn.16672 /UG_TITLE=ESTs	BE113476	ENSRNOG00000039265
1372709_PM_at	0.0300188	1.11578	down	Bcap29	B-cell receptor-associated protein 29	298943	gb:AI172204 /DB_XREF=gi:3712244 /DB_XREF=EST218201 /CLONE=RMUBW24 /FEA=EST /CNT=20 /TID=Rn.19451.1 /TIER=Stack /STK=10 /UG=Rn.19451 /UG_TITLE=ESTs	AI172204	ENSRNOG00000007884
1372710_PM_at	0.0331663	1.09642	down	Bet1	blocked early in transport 1 homolog (S. cerevisiae)	29631	gb:AI175027 /DB_XREF=gi:3725665 /DB_XREF=EST218545 /CLONE=RMUCB25 /FEA=EST /CNT=19 /TID=Rn.3953.1 /TIER=Stack /STK=10 /UG=Rn.3953 /UG_TITLE=ESTs	AI175027	ENSRNOG00000011008
1372712_PM_at	0.00780206	1.13989	down	Ttc1	tetratricopeptide repeat domain 1	287208	gb:BG380294 /DB_XREF=gi:13304766 /DB_XREF=UI-R-CS0-btv-d-08-0-UI.s1 /CLONE=UI-R-CS0-btv-d-08-0-UI /FEA=EST /CNT=19 /TID=Rn.8836.1 /TIER=Stack /STK=10 /UG=Rn.8836 /UG_TITLE=ESTs, Weakly similar to JC7111 tetratricopeptide repeat-containing protein - mouse (M.musculus)	BG380294	ENSRNOG00000003980
1372718_PM_at	0.0478036	1.0708	down	LOC685029	similar to anaphase promoting complex subunit 13	685029	gb:AA799572 /DB_XREF=gi:2862527 /DB_XREF=EST189069 /CLONE=RHEAC68 /FEA=EST /CNT=17 /TID=Rn.11602.1 /TIER=Stack /STK=10 /UG=Rn.11602 /UG_TITLE=ESTs, Weakly similar to T13576 hypothetical protein EG:52C10.5 - fruit fly (D.melanogaster)	AA799572	---
1372720_PM_at	0.044418	1.05515	up	Btbd1	BTB (POZ) domain containing 1	293060	gb:AA848449 /DB_XREF=gi:4131644 /DB_XREF=EST191209 /CLONE=RKIAC42 /FEA=EST /CNT=26 /TID=Rn.6364.1 /TIER=Stack /STK=10 /UG=Rn.6364 /UG_TITLE=ESTs	AA848449	ENSRNOG00000019529
1372730_PM_at	0.0206461	1.06643	down	LOC684304	similar to Mitochondrial 39S ribosomal protein L39 (L39mt) (MRP-L39)	684304	gb:BF282327 /DB_XREF=gi:11213498 /DB_XREF=EST447019 /CLONE=RGIDN27 /FEA=EST /CNT=16 /TID=Rn.13075.1 /TIER=Stack /STK=10 /UG=Rn.13075 /UG_TITLE=ESTs, Highly similar to PD22_MOUSE PUTATIVE PROTEIN PRED22 HOMOLOG (M.musculus)	BF282327	---
1372732_PM_at	0.012618	1.14604	down	Itpa	inosine triphosphatase (nucleoside triphosphate pyrophosphatase)	311422	gb:BM386917 /DB_XREF=gi:18186970 /DB_XREF=UI-R-CN1-cjh-l-20-0-UI.s1 /CLONE=UI-R-CN1-cjh-l-20-0-UI /FEA=EST /CNT=18 /TID=Rn.22367.1 /TIER=Stack /STK=10 /UG=Rn.22367 /UG_TITLE=ESTs, Weakly similar to T27537 hypothetical protein ZC395.7 - Caenorhabditis elegans (C.elegans)	BM386917	---
1372741_PM_at	0.0389366	1.05336	down	Sccpdh	saccharopine dehydrogenase (putative)	305021	gb:AI412013 /DB_XREF=gi:4255517 /DB_XREF=EST240307 /CLONE=RKIEJ43 /FEA=EST /CNT=25 /TID=Rn.4274.1 /TIER=Stack /STK=10 /UG=Rn.4274 /UG_TITLE=ESTs, Weakly similar to F22F7.1.p (Caenorhabditis elegans) (C.elegans)	AI412013	ENSRNOG00000037984
1372775_PM_at	0.0180729	1.22519	up	Brd3	bromodomain containing 3	362092	gb:AI172375 /DB_XREF=gi:3712415 /DB_XREF=EST218380 /CLONE=RMUBY55 /FEA=EST /CNT=15 /TID=Rn.16796.1 /TIER=Stack /STK=10 /UG=Rn.16796 /UG_TITLE=ESTs, Highly similar to BRD3_HUMAN BROMODOMAIN-CONTAINING PROTEIN 3 (RING3-LIKE PROTEIN) (H.sapiens)	AI172375	---
1372793_PM_at	0.0241184	1.16933	down	Ssbp1	single-stranded DNA binding protein 1	54304	gb:BE108903 /DB_XREF=gi:8501008 /DB_XREF=UI-R-BS1-ayz-g-02-0-UI.s1 /CLONE=UI-R-BS1-ayz-g-02-0-UI /FEA=EST /CNT=13 /TID=Rn.12937.1 /TIER=Stack /STK=10 /UG=Rn.12937 /UG_TITLE=ESTs, Highly similar to SSB RAT SINGLE-STRANDED DNA-BINDING PROTEIN, MITOCHONDRIAL PRECURSOR (R.norvegicus)	BE108903	ENSRNOG00000012100
1372808_PM_at	0.0108351	1.09151	down	Mthfd2	methylenetetrahydrofolate dehydrogenase (NADP+ dependent) 2, methenyltetrahydrofolate cyclohydrolase	680308	gb:AW251324 /DB_XREF=gi:6594915 /DB_XREF=UI-R-BJ0-adg-g-12-0-UI.s1 /CLONE=UI-R-BJ0-adg-g-12-0-UI /FEA=EST /CNT=16 /TID=Rn.11744.1 /TIER=Stack /STK=10 /UG=Rn.11744 /UG_TITLE=ESTs, Highly similar to NAD-DEPENDENT METHYLENETETRAHYDROFOLATE DEHYDROGENASE METHENYLTETRAHYDROFOLATE CYCLOHYDROLASE MITOCHONDRIAL PRECURSOR (M.musculus)	AW251324	---
1372809_PM_at	0.0457424	1.13169	down	LOC290595	hypothetical gene supported by AF152002	290595	gb:AI716200 /DB_XREF=gi:5033453 /DB_XREF=UI-R-Y0-abl-g-11-0-UI.s2 /CLONE=UI-R-Y0-abl-g-11-0-UI /FEA=EST /CNT=16 /TID=Rn.9572.1 /TIER=Stack /STK=10 /UG=Rn.9572 /UG_TITLE=ESTs, Weakly similar to ABD4 MOUSE ATP-BINDING CASSETTE, SUB-FAMILY D, MEMBER 4 (M.musculus)	AI716200	---
1372810_PM_at	0.0302143	1.1055	down	Hnrpdl	heterogeneous nuclear ribonucleoprotein D-like	305178	gb:BF281256 /DB_XREF=gi:11212242 /DB_XREF=EST445763 /CLONE=RGIAA91 /FEA=EST /CNT=15 /TID=Rn.16833.1 /TIER=Stack /STK=10 /UG=Rn.16833 /UG_TITLE=ESTs, Weakly similar to HETEROGENEOUS NUCLEAR RIBONUCLEOPROTEIN C (R.norvegicus)	BF281256	ENSRNOG00000002270
1372815_PM_at	0.0359976	1.07759	down	Magoh	mago-nashi homolog, proliferation-associated (Drosophila)	298385	gb:BG673028 /DB_XREF=gi:13895127 /DB_XREF=DRNBHF09 /CLONE=DRNBHF09 /FEA=EST /CNT=14 /TID=Rn.8332.1 /TIER=Stack /STK=10 /UG=Rn.8332 /UG_TITLE=ESTs, Highly similar to MGN_HUMAN MAGO NASHI PROTEIN HOMOLOG (M.musculus)	BG673028	ENSRNOG00000012778
1372818_PM_at	0.0277646	1.09591	down	Colec12	collectin sub-family member 12	361289	gb:BI284441 /DB_XREF=gi:14937123 /DB_XREF=UI-R-CX0s-ccr-b-05-0-UI.s1 /CLONE=UI-R-CX0s-ccr-b-05-0-UI /FEA=EST /CNT=13 /TID=Rn.31273.1 /TIER=Stack /STK=10 /UG=Rn.31273 /UG_TITLE=ESTs, Weakly similar to KUCR RAT KUPFFER CELL RECEPTOR (R.norvegicus)	BI284441	---
1372820_PM_at	0.00665143	1.13655	down	---	---	---	gb:BE109102 /DB_XREF=gi:8501207 /DB_XREF=UI-R-BS1-azb-a-05-0-UI.s1 /CLONE=UI-R-BS1-azb-a-05-0-UI /FEA=EST /CNT=13 /TID=Rn.3225.1 /TIER=Stack /STK=10 /UG=Rn.3225 /UG_TITLE=ESTs	BE109102	---
1372869_PM_at	0.0017719	1.15572	down	RGD1560805///LOC689842	similar to Nucleolar GTP-binding protein 1 (Chronic renal failure gene protein) (GTP-binding protein NGB) /// similar to isopentenyl diphosphate delta-isomerase type 2	291269 /// 689842	gb:BE109202 /DB_XREF=gi:8501307 /DB_XREF=UI-R-BS1-azd-b-02-0-UI.s1 /CLONE=UI-R-BS1-azd-b-02-0-UI /FEA=EST /CNT=13 /TID=Rn.8867.2 /TIER=Stack /STK=10 /UG=Rn.8867 /LL=114300 /UG_GENE=Crfg /UG_TITLE=G protein-binding protein CRFG	BE109202	ENSRNOG00000016217
1372903_PM_at	0.0224467	1.171	down	Kif18b	kinesin family member 18B	303575	gb:AI410054 /DB_XREF=gi:4253558 /DB_XREF=EST238347 /CLONE=RPLDH62 /FEA=EST /CNT=11 /TID=Rn.12616.1 /TIER=Stack /STK=10 /UG=Rn.12616 /UG_TITLE=ESTs	AI410054	ENSRNOG00000021713
1372927_PM_at	0.00867534	1.13136	down	Mrpl50	mitochondrial ribosomal protein L50	362517	gb:AA891839 /DB_XREF=gi:3018718 /DB_XREF=EST195642 /CLONE=RKIAH45 /FEA=EST /CNT=11 /TID=Rn.1787.1 /TIER=Stack /STK=10 /UG=Rn.1787 /UG_TITLE=ESTs	AA891839	ENSRNOG00000007328
1372945_PM_at	0.0418898	1.10049	up	Ing3	inhibitor of growth family, member 3	312154	gb:BI296751 /DB_XREF=gi:14961491 /DB_XREF=UI-R-CV2-cgv-h-04-0-UI.s1 /CLONE=UI-R-CV2-cgv-h-04-0-UI /FEA=EST /CNT=13 /TID=Rn.52988.1 /TIER=Stack /STK=10 /UG=Rn.52988 /UG_TITLE=ESTs, Weakly similar to T27095 hypothetical protein Y51H1A.4 - Caenorhabditis elegans (C.elegans)	BI296751	ENSRNOG00000005496
1372946_PM_at	0.0265407	1.11881	down	RGD1562747	similar to RIKEN cDNA 1110012L19	292328	gb:AI411957 /DB_XREF=gi:4255461 /DB_XREF=EST240251 /CLONE=RKIES12 /FEA=EST /CNT=13 /TID=Rn.13658.1 /TIER=Stack /STK=10 /UG=Rn.13658 /UG_TITLE=ESTs	AI411957	ENSRNOG00000037352
1372988_PM_at	0.0178256	1.07621	down	Cnot10	CCR4-NOT transcription complex, subunit 10	316034	gb:BF397012 /DB_XREF=gi:11381995 /DB_XREF=UI-R-BS2-beb-g-11-0-UI.s1 /CLONE=UI-R-BS2-beb-g-11-0-UI /FEA=EST /CNT=10 /TID=Rn.6804.1 /TIER=Stack /STK=10 /UG=Rn.6804 /UG_TITLE=ESTs, Moderately similar to T17337 hypothetical protein DKFZp434K115.1 (H.sapiens)	BF397012	---
1373005_PM_at	0.0215826	1.07098	up	Krtdap	keratinocyte differentiation associated protein	65186	gb:BI282568 /DB_XREF=gi:14933467 /DB_XREF=UI-R-DD0-bzy-e-09-0-UI.s1 /CLONE=UI-R-DD0-bzy-e-09-0-UI /FEA=EST /CNT=10 /TID=Rn.15442.1 /TIER=Stack /STK=10 /UG=Rn.15442 /UG_TITLE=ESTs	BI282568	---
1373020_PM_at	0.0237689	1.1571	down	Magmas	mitochondria-associated protein involved in granulocyte-macrophage colony-stimulating factor signal transduction	679907	gb:BG379323 /DB_XREF=gi:13303795 /DB_XREF=UI-R-CS0-btu-d-10-0-UI.s1 /CLONE=UI-R-CS0-btu-d-10-0-UI /FEA=EST /CNT=19 /TID=Rn.2996.1 /TIER=Stack /STK=9 /UG=Rn.2996 /UG_TITLE=ESTs, Highly similar to YCD6_HUMAN HYPOTHETICAL PROTEIN CGI-136 (H.sapiens)	BG379323	---
1373039_PM_at	0.0317679	1.16281	down	---	---	---	gb:AI600081 /DB_XREF=gi:4609129 /DB_XREF=EST251784 /CLONE=REMDQ91 /FEA=EST /CNT=15 /TID=Rn.7306.1 /TIER=Stack /STK=9 /UG=Rn.7306 /UG_TITLE=ESTs	AI600081	---
1373044_PM_at	0.00159776	1.06971	down	RGD1565840	similar to Dendritic cell protein GA17	295975	gb:BI285403 /DB_XREF=gi:14939005 /DB_XREF=UI-R-DB0-byz-f-09-0-UI.s1 /CLONE=UI-R-DB0-byz-f-09-0-UI /FEA=EST /CNT=16 /TID=Rn.3390.1 /TIER=Stack /STK=9 /UG=Rn.3390 /UG_TITLE=ESTs, Highly similar to GA17 protein (H.sapiens)	BI285403	ENSRNOG00000012738
1373048_PM_at	0.0199043	1.06842	up	Actr10	actin-related protein 10 homolog (S. cerevisiae)	299121	gb:AI177051 /DB_XREF=gi:3727689 /DB_XREF=EST220658 /CLONE=ROVCA23 /FEA=EST /CNT=15 /TID=Rn.3314.1 /TIER=Stack /STK=9 /UG=Rn.3314 /UG_TITLE=ESTs, Weakly similar to ACTB_HUMAN ACTIN, CYTOPLASMIC 1 (R.norvegicus)	AI177051	ENSRNOG00000007504
1373064_PM_at	0.0384963	1.0889	down	Dnajc15	DnaJ (Hsp40) homolog, subfamily C, member 15	290370	gb:BM390416 /DB_XREF=gi:18190469 /DB_XREF=UI-R-CN1-cjq-n-11-0-UI.s1 /CLONE=UI-R-CN1-cjq-n-11-0-UI /FEA=EST /CNT=16 /TID=Rn.8092.1 /TIER=Stack /STK=9 /UG=Rn.8092 /UG_TITLE=ESTs, Weakly similar to T25890 hypothetical protein T19B4.4 - Caenorhabditis elegans (C.elegans)	BM390416	ENSRNOG00000009063
1373116_PM_at	0.0335462	1.08664	down	Kpna3	Karyopherin (importin) alpha 3	361055	gb:AA945320 /DB_XREF=gi:3105236 /DB_XREF=EST200819 /CLONE=RLIAK72 /FEA=EST /CNT=12 /TID=Rn.18504.1 /TIER=Stack /STK=9 /UG=Rn.18504 /UG_TITLE=ESTs, Highly similar to IMA3 MOUSE IMPORTIN ALPHA-3 SUBUNIT (M.musculus)	AA945320	---
1373138_PM_at	0.0105619	1.11594	down	Nudt5	nudix (nucleoside diphosphate linked moiety X)-type motif 5	361274	gb:AA858886 /DB_XREF=gi:4229079 /DB_XREF=UI-R-A0-bd-c-04-0-UI.s1 /CLONE=UI-R-A0-bd-c-04-0-UI /FEA=EST /CNT=14 /TID=Rn.2456.1 /TIER=Stack /STK=9 /UG=Rn.2456 /UG_TITLE=ESTs, Weakly similar to W02G9.1.p (Caenorhabditis elegans) (C.elegans)	AA858886	ENSRNOG00000017741
1373146_PM_at	0.0458664	1.09086	down	Ssx2ip	synovial sarcoma, X breakpoint 2 interacting protein	308023	gb:AI716240 /DB_XREF=gi:5033493 /DB_XREF=UI-R-Y0-abr-d-12-0-UI.s1 /CLONE=UI-R-Y0-abr-d-12-0-UI /FEA=EST /CNT=13 /TID=Rn.21417.1 /TIER=Stack /STK=9 /UG=Rn.21417 /UG_TITLE=ESTs	AI716240	ENSRNOG00000015425
1373148_PM_at	0.0497926	1.06774	up	Cpxm2	carboxypeptidase X (M14 family), member 2	293566	gb:BM384570 /DB_XREF=gi:18184623 /DB_XREF=UI-R-DY0-ckl-e-05-0-UI.s1 /CLONE=UI-R-DY0-ckl-e-05-0-UI /FEA=EST /CNT=12 /TID=Rn.24920.1 /TIER=Stack /STK=9 /UG=Rn.24920 /UG_TITLE=ESTs	BM384570	---
1373155_PM_at	0.049129	1.10339	down	Mrpl46	mitochondrial ribosomal protein L46	293054	gb:BI283167 /DB_XREF=gi:14934644 /DB_XREF=UI-R-CU0s-cca-h-03-0-UI.s1 /CLONE=UI-R-CU0s-cca-h-03-0-UI /FEA=EST /CNT=12 /TID=Rn.22670.1 /TIER=Stack /STK=9 /UG=Rn.22670 /UG_TITLE=ESTs	BI283167	ENSRNOG00000018547
1373200_PM_at	0.0135601	1.08113	down	Eef1e1	eukaryotic translation elongation factor 1 epsilon 1	291057	gb:AI600237 /DB_XREF=gi:4609285 /DB_XREF=EST251940 /CLONE=REMEN66 /FEA=EST /CNT=17 /TID=Rn.6668.1 /TIER=Stack /STK=9 /UG=Rn.6668 /UG_TITLE=ESTs, Moderately similar to MCA3_HUMAN Multisynthetase complex auxiliary component p18 (H.sapiens)	AI600237	ENSRNOG00000016390
1373214_PM_at	0.00652187	1.11057	down	Kdelc1	KDEL (Lys-Asp-Glu-Leu) containing 1	316370	gb:AA945238 /DB_XREF=gi:3105154 /DB_XREF=EST200737 /CLONE=RLIAI43 /FEA=EST /CNT=11 /TID=Rn.7848.1 /TIER=Stack /STK=9 /UG=Rn.7848 /UG_TITLE=ESTs	AA945238	ENSRNOG00000011740
1373216_PM_at	0.0078303	1.15595	down	LOC691849	hypothetical protein LOC691849	691849	gb:AI236521 /DB_XREF=gi:3830027 /DB_XREF=EST233083 /CLONE=ROVDH19 /FEA=EST /CNT=11 /TID=Rn.23778.1 /TIER=Stack /STK=9 /UG=Rn.23778 /UG_TITLE=ESTs	AI236521	---
1373232_PM_at	0.0156481	1.12034	down	LOC302022	similar to nidogen 2 protein	302022	gb:AI008975 /DB_XREF=gi:4132974 /DB_XREF=EST203426 /CLONE=REMBG48 /FEA=EST /CNT=10 /TID=Rn.13869.1 /TIER=Stack /STK=9 /UG=Rn.13869 /UG_TITLE=ESTs, Weakly similar to NIDOGEN (R.norvegicus)	AI008975	---
1373237_PM_at	0.0258998	1.15811	up	---	---	---	gb:BI281233 /DB_XREF=gi:14930759 /DB_XREF=UI-R-CT0s-cat-h-11-0-UI.s1 /CLONE=UI-R-CT0s-cat-h-11-0-UI /FEA=EST /CNT=10 /TID=Rn.11730.1 /TIER=Stack /STK=9 /UG=Rn.11730 /UG_TITLE=ESTs	BI281233	---
1373254_PM_at	0.00791345	1.09917	down	Krt10	keratin 10	450225	gb:BI282479 /DB_XREF=gi:14933287 /DB_XREF=UI-R-DD0-bzx-c-10-0-UI.s1 /CLONE=UI-R-DD0-bzx-c-10-0-UI /FEA=EST /CNT=10 /TID=Rn.12461.1 /TIER=Stack /STK=9 /UG=Rn.12461 /UG_TITLE=ESTs	BI282479	ENSRNOG00000030170
1373296_PM_a_at	0.0305317	1.17754	down	RGD1311634	similar to RIKEN cDNA 3200002M19	293155	gb:AA800001 /DB_XREF=gi:2862956 /DB_XREF=EST189498 /CLONE=RHEAI15 /FEA=EST /CNT=9 /TID=Rn.6268.1 /TIER=Stack /STK=9 /UG=Rn.6268 /UG_TITLE=ESTs, Weakly similar to SPBP RAT PROSTATIC SPERMINE-BINDING PROTEIN PRECURSOR (R.norvegicus)	AA800001	---
1373297_PM_at	0.038903	1.14632	up	---	---	---	gb:BI296690 /DB_XREF=gi:14961369 /DB_XREF=UI-R-CV2-cgv-b-11-0-UI.s1 /CLONE=UI-R-CV2-cgv-b-11-0-UI /FEA=EST /CNT=9 /TID=Rn.33878.1 /TIER=Stack /STK=9 /UG=Rn.33878 /UG_TITLE=ESTs	BI296690	---
1373329_PM_at	0.0199067	1.21157	down	Tmprss2	transmembrane protease, serine 2	156435	gb:AI412136 /DB_XREF=gi:4255640 /DB_XREF=EST240430 /CLONE=RKIEH07 /FEA=EST /CNT=9 /TID=Rn.34835.1 /TIER=Stack /STK=9 /UG=Rn.34835 /UG_TITLE=ESTs	AI412136	---
1373335_PM_at	0.0382009	1.07073	up	Zdhhc9	zinc finger, DHHC-type containing 9	302808	gb:BE349808 /DB_XREF=gi:9261661 /DB_XREF=hq43d06.x1 /CLONE=IMAGE:3122123 /FEA=EST /CNT=9 /TID=Rn.15254.1 /TIER=Stack /STK=9 /UG=Rn.15254 /UG_TITLE=ESTs	BE349808	---
1373340_PM_at	0.00997113	1.28599	down	Dusp9	dual specificity phosphatase 9	293847	gb:AI179321 /DB_XREF=gi:3729959 /DB_XREF=EST223016 /CLONE=RSPCF17 /FEA=EST /CNT=9 /TID=Rn.9342.1 /TIER=Stack /STK=9 /UG=Rn.9342 /UG_TITLE=ESTs, Moderately similar to DUAL SPECIFICITY PROTEIN PHOSPHATASE 6 (R.norvegicus)	AI179321	ENSRNOG00000025298
1373352_PM_at	0.0225414	1.13798	down	LOC685385	similar to S100 calcium binding protein A14	685385	gb:BM387197 /DB_XREF=gi:18187250 /DB_XREF=UI-R-CN1-cji-p-09-0-UI.s1 /CLONE=UI-R-CN1-cji-p-09-0-UI /FEA=EST /CNT=9 /TID=Rn.40640.1 /TIER=Stack /STK=9 /UG=Rn.40640 /UG_TITLE=ESTs, Weakly similar to S113 MOUSE S100 CALCIUM-BINDING PROTEIN A13 (M.musculus)	BM387197	---
1373355_PM_at	0.046463	1.15935	down	---	---	---	gb:BI299014 /DB_XREF=gi:14975294 /DB_XREF=UI-R-CV2-chq-b-10-0-UI.s1 /CLONE=UI-R-CV2-chq-b-10-0-UI /FEA=EST /CNT=9 /TID=Rn.12638.1 /TIER=Stack /STK=9 /UG=Rn.12638 /UG_TITLE=ESTs	BI299014	ENSRNOG00000000929
1373361_PM_at	0.0269425	1.08718	down	---	---	---	gb:BF394144 /DB_XREF=gi:11379008 /DB_XREF=UI-R-CA0-bha-c-02-0-UI.s1 /CLONE=UI-R-CA0-bha-c-02-0-UI /FEA=EST /CNT=9 /TID=Rn.62782.1 /TIER=Stack /STK=9 /UG=Rn.62782 /UG_TITLE=ESTs	BF394144	---
1373371_PM_a_at	0.0382034	1.10697	down	Fmc1	formation of mitochondrial complexes 1 homolog (S. cerevisiae)	500087	gb:AA892572 /DB_XREF=gi:3019451 /DB_XREF=EST196375 /CLONE=RKIAU05 /FEA=EST /CNT=17 /TID=Rn.65180.1 /TIER=Stack /STK=8 /UG=Rn.65180 /UG_TITLE=ESTs	AA892572	ENSRNOG00000005618
1373374_PM_at	0.0262656	1.08439	up	Lmo4	LIM domain only 4	362051	gb:BM389691 /DB_XREF=gi:18189744 /DB_XREF=UI-R-CN1-cjp-c-08-0-UI.s1 /CLONE=UI-R-CN1-cjp-c-08-0-UI /FEA=EST /CNT=16 /TID=Rn.2517.1 /TIER=Stack /STK=8 /UG=Rn.2517 /UG_TITLE=ESTs	BM389691	---
1373383_PM_at	0.0140779	1.07408	down	Mterfd1	MTERF domain containing 1	299514	gb:AA848807 /DB_XREF=gi:4131674 /DB_XREF=EST191568 /CLONE=RLUAG66 /FEA=EST /CNT=14 /TID=Rn.3177.1 /TIER=Stack /STK=8 /UG=Rn.3177 /UG_TITLE=ESTs, Moderately similar to AF132946 1 CGI-12 protein (H.sapiens)	AA848807	ENSRNOG00000004492
1373387_PM_at	0.000546144	1.14933	down	LOC688717	similar to CG33714-PB, isoform B	688717	gb:BF558946 /DB_XREF=gi:11668676 /DB_XREF=UI-R-A0-az-h-09-0-UI.r1 /CLONE=UI-R-A0-az-h-09-0-UI /FEA=EST /CNT=14 /TID=Rn.2233.1 /TIER=Stack /STK=8 /UG=Rn.2233 /UG_TITLE=ESTs, Weakly similar to CARG-BINDING FACTOR-A (M.musculus)	BF558946	ENSRNOG00000012314
1373391_PM_at	0.000266556	1.13709	down	Tmco1	transmembrane and coiled-coil domains 1	289196	gb:BM390343 /DB_XREF=gi:18190396 /DB_XREF=UI-R-CN1-cjq-m-22-0-UI.s1 /CLONE=UI-R-CN1-cjq-m-22-0-UI /FEA=EST /CNT=16 /TID=Rn.16738.1 /TIER=Stack /STK=8 /UG=Rn.16738 /UG_TITLE=ESTs, Moderately similar to F22B5.10.p (Caenorhabditis elegans) (C.elegans)	BM390343	ENSRNOG00000003928
1373413_PM_at	0.00749373	1.08284	down	Tmem128	transmembrane protein 128	360952	gb:AW531093 /DB_XREF=gi:7173507 /DB_XREF=UI-R-C4-alg-f-03-0-UI.s1 /CLONE=UI-R-C4-alg-f-03-0-UI /FEA=EST /CNT=14 /TID=Rn.41433.1 /TIER=Stack /STK=8 /UG=Rn.41433 /UG_TITLE=ESTs	AW531093	---
1373438_PM_at	0.00213852	1.07225	up	Ube2o	ubiquitin-conjugating enzyme E2O	303689	gb:BE329352 /DB_XREF=gi:9203128 /DB_XREF=hq39h01.x1 /CLONE=IMAGE:3121777 /FEA=EST /CNT=12 /TID=Rn.27770.1 /TIER=Stack /STK=8 /UG=Rn.27770 /UG_TITLE=ESTs	BE329352	---
1373440_PM_at	0.0155254	1.18908	down	Lyrm2 /// Mdn1	midasin homolog (yeast)///LYR motif containing 2	362498 /// 690354	gb:AI175525 /DB_XREF=gi:3726163 /DB_XREF=EST219079 /CLONE=RMUCO57 /FEA=EST /CNT=12 /TID=Rn.22183.1 /TIER=Stack /STK=8 /UG=Rn.22183 /UG_TITLE=ESTs	AI175525	ENSRNOG00000024319
1373448_PM_at	0.00621262	1.10452	down	Acyp1	acylphosphatase 1, erythrocyte (common) type	299203	gb:AI413052 /DB_XREF=gi:4256556 /DB_XREF=EST241353 /CLONE=RBREC08 /FEA=EST /CNT=13 /TID=Rn.3465.1 /TIER=Stack /STK=8 /UG=Rn.3465 /UG_TITLE=ESTs, Weakly similar to ACYLPHOSPHATASE, MUSCLE TYPE ISOZYME (R.norvegicus)	AI413052	ENSRNOG00000006744
1373458_PM_at	0.000514644	1.19368	down	Bex4	brain expressed gene 4	501624	gb:BI289546 /DB_XREF=gi:14947228 /DB_XREF=UI-R-DK0-cff-c-12-0-UI.s1 /CLONE=UI-R-DK0-cff-c-12-0-UI /FEA=EST /CNT=12 /TID=Rn.9287.1 /TIER=Stack /STK=8 /UG=Rn.9287 /UG_TITLE=ESTs, Weakly similar to C35826 hypothetical 13K protein A (H.sapiens)	BI289546	---
1373461_PM_at	0.0140781	1.08986	down	Rai12	retinoic acid induced 12	287446	gb:AI412649 /DB_XREF=gi:4256153 /DB_XREF=EST240948 /CLONE=RBRDK85 /FEA=EST /CNT=12 /TID=Rn.9041.1 /TIER=Stack /STK=8 /UG=Rn.9041 /UG_TITLE=ESTs	AI412649	ENSRNOG00000027628
1373462_PM_at	0.046663	1.04926	down	Eed	embryonic ectoderm development	293104	gb:AI170325 /DB_XREF=gi:3710365 /DB_XREF=EST216251 /CLONE=RLUCG93 /FEA=EST /CNT=12 /TID=Rn.3939.1 /TIER=Stack /STK=8 /UG=Rn.3939 /UG_TITLE=ESTs, Weakly similar to esc-P1 (Drosophila melanogaster) (D.melanogaster)	AI170325	ENSRNOG00000017509
1373475_PM_at	0.000141828	1.17183	down	Ccdc58	coiled-coil domain containing 58	288065	gb:BM390469 /DB_XREF=gi:18190522 /DB_XREF=UI-R-CN1-cjq-h-18-0-UI.s1 /CLONE=UI-R-CN1-cjq-h-18-0-UI /FEA=EST /CNT=11 /TID=Rn.3592.1 /TIER=Stack /STK=8 /UG=Rn.3592 /UG_TITLE=ESTs	BM390469	ENSRNOG00000031653
1373484_PM_at	0.011333	1.11805	down	Klhl13	kelch-like 13 (Drosophila)	313445	gb:AI179828 /DB_XREF=gi:3730466 /DB_XREF=EST223558 /CLONE=RSPCM48 /FEA=EST /CNT=11 /TID=Rn.24229.1 /TIER=Stack /STK=8 /UG=Rn.24229 /UG_TITLE=ESTs	AI179828	ENSRNOG00000014029
1373487_PM_at	0.0457607	1.0878	up	---	---	---	gb:AI030552 /DB_XREF=gi:3248378 /DB_XREF=UI-R-C0-ji-h-05-0-UI.s1 /CLONE=UI-R-C0-ji-h-05-0-UI /FEA=EST /CNT=11 /TID=Rn.6377.1 /TIER=Stack /STK=8 /UG=Rn.6377 /UG_TITLE=ESTs	AI030552	---
1373490_PM_at	0.00597615	1.13041	down	Gmfg	glia maturation factor, gamma	113940	gb:BG666787 /DB_XREF=gi:13888709 /DB_XREF=DRABWG04 /CLONE=DRABWG04 /FEA=EST /CNT=11 /TID=Rn.15333.1 /TIER=Stack /STK=8 /UG=Rn.15333 /UG_TITLE=ESTs, Highly similar to JC7218 glia maturation factor-gamma - rat (R.norvegicus)	BG666787	ENSRNOG00000019838
1373494_PM_at	0.0152343	1.15936	up	Bcr	breakpoint cluster region	309696	gb:BE120831 /DB_XREF=gi:8512936 /DB_XREF=UI-R-BS1-azt-a-06-0-UI.s1 /CLONE=UI-R-BS1-azt-a-06-0-UI /FEA=EST /CNT=11 /TID=Rn.12782.1 /TIER=Stack /STK=8 /UG=Rn.12782 /UG_TITLE=ESTs, Weakly similar to chimerin (chimaerin) 1 (Rattus norvegicus) (R.norvegicus)	BE120831	---
1373499_PM_at	0.0222772	1.14928	down	Gas5	growth arrest specific 5	81714	gb:BF287008 /DB_XREF=gi:11218078 /DB_XREF=EST451599 /CLONE=RGIFX84 /FEA=EST /CNT=11 /TID=Rn.14733.1 /TIER=Stack /STK=8 /UG=Rn.14733 /UG_TITLE=ESTs	BF287008	---
1373503_PM_at	0.0210327	1.09752	down	Lrch4	leucine-rich repeats and calponin homology (CH) domain containing 4	360779	gb:AA892504 /DB_XREF=gi:3019383 /DB_XREF=EST196307 /CLONE=RKIAS25 /FEA=EST /CNT=19 /TID=Rn.24664.1 /TIER=Stack /STK=8 /UG=Rn.24664 /UG_TITLE=ESTs	AA892504	---
1373538_PM_at	0.02935	1.27257	up	Usp1	ubiquitin specific peptidase 1	313387	gb:AW525342 /DB_XREF=gi:7167727 /DB_XREF=UI-R-BJ0p-aiq-e-12-0-UI.s1 /CLONE=UI-R-BJ0p-aiq-e-12-0-UI /FEA=EST /CNT=10 /TID=Rn.20129.1 /TIER=Stack /STK=8 /UG=Rn.20129 /UG_TITLE=ESTs, Highly similar to T17277 hypothetical protein DKFZp434E0635.1 (H.sapiens)	AW525342	ENSRNOG00000007890
1373543_PM_at	0.00723345	1.11378	down	---	---	---	gb:BI296461 /DB_XREF=gi:14960906 /DB_XREF=UI-R-CV2-cgr-e-02-0-UI.s1 /CLONE=UI-R-CV2-cgr-e-02-0-UI /FEA=EST /CNT=10 /TID=Rn.15116.1 /TIER=Stack /STK=8 /UG=Rn.15116 /UG_TITLE=ESTs	BI296461	---
1373549_PM_at	0.0163991	1.1494	down	Ddx10	DEAD (Asp-Glu-Ala-Asp) box polypeptide 10	300710	gb:BE105699 /DB_XREF=gi:8497841 /DB_XREF=UI-R-BO1-asi-e-04-0-UI.s1 /CLONE=UI-R-BO1-asi-e-04-0-UI /FEA=EST /CNT=10 /TID=Rn.12705.1 /TIER=Stack /STK=8 /UG=Rn.12705 /UG_TITLE=ESTs, Moderately similar to 2210303A RNA helicase (H.sapiens)	BE105699	---
1373563_PM_at	0.00576349	1.09637	down	Ry1	putative nucleic acid binding protein RY-1	362392	gb:H35156 /DB_XREF=gi:980573 /DB_XREF=EST106360 /CLONE=RPCAZ76 /FEA=EST /CNT=10 /TID=Rn.6767.1 /TIER=Stack /STK=8 /UG=Rn.6767 /UG_TITLE=ESTs, Highly similar to I38191 nucleic acid binding protein (H.sapiens)	H35156	ENSRNOG00000017747
1373564_PM_at	0.0304819	1.10539	down	Hibch	3-hydroxyisobutyryl-Coenzyme A hydrolase	301384	gb:AI410548 /DB_XREF=gi:4254052 /DB_XREF=EST238841 /CLONE=RHECY11 /FEA=EST /CNT=10 /TID=Rn.7565.1 /TIER=Stack /STK=8 /UG=Rn.7565 /UG_TITLE=ESTs	AI410548	---
1373585_PM_at	0.000122484	1.24506	down	Synj2bp	synaptojanin 2 binding protein	64531	gb:BE116774 /DB_XREF=gi:8508879 /DB_XREF=UI-R-BS1-ayf-b-05-0-UI.s1 /CLONE=UI-R-BS1-ayf-b-05-0-UI /FEA=EST /CNT=11 /TID=Rn.19779.1 /TIER=Stack /STK=8 /UG=Rn.19779 /UG_TITLE=ESTs	BE116774	ENSRNOG00000006399
1373593_PM_at	0.0391045	1.05957	down	Rnaseh1	ribonuclease H1	298933	gb:BM390974 /DB_XREF=gi:18191027 /DB_XREF=UI-R-CN1-cjm-e-23-0-UI.s1 /CLONE=UI-R-CN1-cjm-e-23-0-UI /FEA=EST /CNT=10 /TID=Rn.13139.1 /TIER=Stack /STK=8 /UG=Rn.13139 /UG_TITLE=ESTs, Highly similar to RNH1_MOUSE Ribonuclease H1 (RNase H1) (M.musculus)	BM390974	ENSRNOG00000008584
1373595_PM_at	0.0382614	1.08642	up	Tmem43	transmembrane protein 43	362401	gb:BM385463 /DB_XREF=gi:18185516 /DB_XREF=UI-R-CN1-clv-n-22-0-UI.s1 /CLONE=UI-R-CN1-clv-n-22-0-UI /FEA=EST /CNT=10 /TID=Rn.15201.1 /TIER=Stack /STK=8 /UG=Rn.15201 /UG_TITLE=ESTs	BM385463	---
1373609_PM_at	0.0141777	1.08352	down	Mrps21	mitochondrial ribosomal protein S21	689432	gb:AI232274 /DB_XREF=gi:4135737 /DB_XREF=EST228962 /CLONE=RKIBZ58 /FEA=EST /CNT=10 /TID=Rn.8603.1 /TIER=Stack /STK=8 /UG=Rn.8603 /UG_TITLE=ESTs, Weakly similar to T29933 hypothetical protein F29B9.10 - Caenorhabditis elegans (C.elegans)	AI232274	---
1373632_PM_at	0.0331547	1.16302	down	Taf9	TAF9 RNA polymerase II, TATA box binding protein (TBP)-associated factor	373541	gb:AI172041 /DB_XREF=gi:3712081 /DB_XREF=EST218036 /CLONE=RMUBU21 /FEA=EST /CNT=9 /TID=Rn.8139.1 /TIER=Stack /STK=8 /UG=Rn.8139 /UG_TITLE=ESTs, Moderately similar to AD04_HUMAN ADRENAL GLAND PROTEIN AD-004 (H.sapiens)	AI172041	ENSRNOG00000039848
1373685_PM_at	0.0268661	1.26336	down	Ankrd37	ankyrin repeat domain 37	361149	gb:BI291430 /DB_XREF=gi:14950960 /DB_XREF=UI-R-CV2-cgq-b-11-0-UI.s1 /CLONE=UI-R-CV2-cgq-b-11-0-UI /FEA=EST /CNT=9 /TID=Rn.21120.1 /TIER=Stack /STK=8 /UG=Rn.21120 /UG_TITLE=ESTs	BI291430	ENSRNOG00000031335
1373731_PM_at	0.00118883	1.25803	down	RGD1564300	similar to phosphoseryl-tRNA kinase	361661	gb:AI409901 /DB_XREF=gi:4253405 /DB_XREF=EST238194 /CLONE=RPLDN04 /FEA=EST /CNT=8 /TID=Rn.9483.1 /TIER=Stack /STK=8 /UG=Rn.9483 /UG_TITLE=ESTs	AI409901	---
1373734_PM_at	0.0268478	1.16793	up	Slco3a1	Solute carrier organic anion transporter family, member 3a1	140915	gb:AI101171 /DB_XREF=gi:3704594 /DB_XREF=EST210460 /CLONE=RBRBG43 /FEA=EST /CNT=8 /TID=Rn.20527.1 /TIER=Stack /STK=8 /UG=Rn.20527 /UG_TITLE=ESTs	AI101171	---
1373738_PM_at	0.0237466	1.07336	down	LOC686999	similar to M phase phosphoprotein 6	686999	gb:BG379494 /DB_XREF=gi:13303966 /DB_XREF=UI-R-CS0-bth-e-11-0-UI.s1 /CLONE=UI-R-CS0-bth-e-11-0-UI /FEA=EST /CNT=8 /TID=Rn.33234.1 /TIER=Stack /STK=8 /UG=Rn.33234 /UG_TITLE=ESTs	BG379494	---
1373761_PM_at	0.0274861	1.09113	down	Fam60a	family with sequence similarity 60, member A	686611	gb:AI176129 /DB_XREF=gi:3726767 /DB_XREF=EST219709 /CLONE=ROVBL08 /FEA=EST /CNT=8 /TID=Rn.9154.1 /TIER=Stack /STK=8 /UG=Rn.9154 /UG_TITLE=ESTs	AI176129	---
1373781_PM_a_at	0.0402314	1.15898	down	Sbsn	suprabasin	292793	gb:AI555257 /DB_XREF=gi:4487620 /DB_XREF=UI-R-C2p-qv-e-10-0-UI.s1 /CLONE=UI-R-C2p-qv-e-10-0-UI /FEA=EST /CNT=8 /TID=Rn.8878.1 /TIER=Stack /STK=8 /UG=Rn.8878 /UG_TITLE=ESTs, Highly similar to G3PT MOUSE GLYCERALDEHYDE 3-PHOSPHATE DEHYDROGENASE, TESTIS-SPECIFIC (M.musculus)	AI555257	---
1373784_PM_at	0.0041364	1.10955	down	Cct8	chaperonin containing Tcp1, subunit 8 (theta)	288305	gb:BF409759 /DB_XREF=gi:11397734 /DB_XREF=UI-R-CA1-bls-e-02-0-UI.s1 /CLONE=UI-R-CA1-bls-e-02-0-UI /FEA=EST /CNT=8 /TID=Rn.18515.1 /TIER=Stack /STK=8 /UG=Rn.18515 /UG_TITLE=ESTs, Weakly similar to UBPW MOUSE UBIQUITIN CARBOXYL-TERMINAL HYDROLASE DUB-1 (M.musculus)	BF409759	ENSRNOG00000001592
1373786_PM_at	0.0378179	1.10213	up	Znf703	zinc finger protein 703	680717	gb:AA924756 /DB_XREF=gi:4235947 /DB_XREF=UI-R-A1-ed-h-10-0-UI.s1 /CLONE=UI-R-A1-ed-h-10-0-UI /FEA=EST /CNT=8 /TID=Rn.15384.1 /TIER=Stack /STK=8 /UG=Rn.15384 /UG_TITLE=ESTs	AA924756	---
1373804_PM_at	0.0138069	1.28746	up	Foxp1	forkhead box P1	297480	gb:AI230954 /DB_XREF=gi:4135600 /DB_XREF=EST227642 /CLONE=REMDD38 /FEA=EST /CNT=8 /TID=Rn.13831.1 /TIER=Stack /STK=8 /UG=Rn.13831 /UG_TITLE=ESTs, Weakly similar to HEPATOCYTE NUCLEAR FACTOR 3 FORKHEAD HOMOLOG 4 (R.norvegicus)	AI230954	ENSRNOG00000009184
1373816_PM_at	0.0170485	1.08577	down	Ap1g1	adaptor-related protein complex 1, gamma 1 subunit	171494	gb:BM383443 /DB_XREF=gi:18183496 /DB_XREF=UI-R-DM1-ckb-l-08-0-UI.s1 /CLONE=UI-R-DM1-ckb-l-08-0-UI /FEA=EST /CNT=19 /TID=Rn.9446.1 /TIER=Stack /STK=7 /UG=Rn.9446 /UG_TITLE=ESTs	BM383443	ENSRNOG00000015390
1373820_PM_at	0.0423873	1.07824	up	Rfwd2	ring finger and WD repeat domain 2	360860	gb:AI179107 /DB_XREF=gi:3729745 /DB_XREF=EST222791 /CLONE=RSPCB86 /FEA=EST /CNT=20 /TID=Rn.8617.1 /TIER=Stack /STK=7 /UG=Rn.8617 /UG_TITLE=ESTs, Weakly similar to COP1 protein (M.musculus)	AI179107	---
1373821_PM_at	0.0287022	1.06144	down	Slc30a5	solute carrier family 30 (zinc transporter), member 5	294698	gb:BF418332 /DB_XREF=gi:11406321 /DB_XREF=UI-R-CA0-bmd-g-12-0-UI.s1 /CLONE=UI-R-CA0-bmd-g-12-0-UI /FEA=EST /CNT=15 /TID=Rn.16711.1 /TIER=Stack /STK=7 /UG=Rn.16711 /UG_TITLE=ESTs	BF418332	ENSRNOG00000018746
1373823_PM_at	0.0489526	1.05089	down	Cks2	CDC28 protein kinase regulatory subunit 2	498709	gb:AA944180 /DB_XREF=gi:3104096 /DB_XREF=EST199679 /CLONE=REMAD35 /FEA=EST /CNT=15 /TID=Rn.6116.1 /TIER=Stack /STK=7 /UG=Rn.6116 /UG_TITLE=ESTs, Highly similar to CKS2 MOUSE CYCLIN-DEPENDENT KINASES REGULATORY SUBUNIT 2 (M.musculus)	AA944180	ENSRNOG00000014130
1373845_PM_at	0.041744	1.0617	down	LOC688235	similar to Nucleolar protein 11	688235	gb:AA944773 /DB_XREF=gi:3104689 /DB_XREF=EST200272 /CLONE=REMAO94 /FEA=EST /CNT=15 /TID=Rn.24943.1 /TIER=Stack /STK=7 /UG=Rn.24943 /UG_TITLE=ESTs, Moderately similar to T14789 hypothetical protein DKFZp586L0724.1 (H.sapiens)	AA944773	---
1373860_PM_at	0.00205385	1.26805	up	Sox4	SRY (sex determining region Y)-box 4	364712	gb:BI297183 /DB_XREF=gi:14962329 /DB_XREF=UI-R-DK0-cgc-d-08-0-UI.s1 /CLONE=UI-R-DK0-cgc-d-08-0-UI /FEA=EST /CNT=12 /TID=Rn.15099.1 /TIER=Stack /STK=7 /UG=Rn.15099 /UG_TITLE=ESTs, Highly similar to S37303 sox-4 protein - mouse (M.musculus)	BI297183	ENSRNOG00000018588
1373863_PM_at	0.0168748	1.52043	up	Map4k4	mitogen-activated protein kinase kinase kinase kinase 4	301363	gb:BF398680 /DB_XREF=gi:11383677 /DB_XREF=UI-R-BS2-ber-f-04-0-UI.s1 /CLONE=UI-R-BS2-ber-f-04-0-UI /FEA=EST /CNT=28 /TID=Rn.37874.1 /TIER=Stack /STK=7 /UG=Rn.37874 /UG_TITLE=ESTs, Highly similar to mitogen-activated protein kinase kinase kinase kinase 4; NCK interacting kinase; HPKGCK-like kinase (Mus musculus) (M.musculus)	BF398680	---
1373864_PM_at	0.039496	1.10483	up	Map4k4	mitogen-activated protein kinase kinase kinase kinase 4	301363	gb:BM388810 /DB_XREF=gi:18188863 /DB_XREF=UI-R-DZ0-ckn-o-01-0-UI.s1 /CLONE=UI-R-DZ0-ckn-o-01-0-UI /FEA=EST /CNT=28 /TID=Rn.37874.1 /TIER=Stack /STK=6 /UG=Rn.37874 /UG_TITLE=ESTs, Highly similar to mitogen-activated protein kinase kinase kinase kinase 4; NCK interacting kinase; HPKGCK-like kinase (Mus musculus) (M.musculus)	BM388810	---
1373869_PM_at	0.0216943	1.14396	down	Soat1	sterol O-acyltransferase 1	81782	gb:AI012418 /DB_XREF=gi:3226250 /DB_XREF=EST206869 /CLONE=RPLAX02 /FEA=EST /CNT=14 /TID=Rn.13213.1 /TIER=Stack /STK=7 /UG=Rn.13213 /UG_TITLE=ESTs	AI012418	ENSRNOG00000004111
1373882_PM_at	0.030575	1.2817	down	Figf	c-fos induced growth factor	360457	gb:AI170324 /DB_XREF=gi:3710364 /DB_XREF=EST216250 /CLONE=RLUCG92 /FEA=EST /CNT=12 /TID=Rn.4256.1 /TIER=Stack /STK=7 /UG=Rn.4256 /UG_TITLE=ESTs	AI170324	ENSRNOG00000003587
1373885_PM_at	0.0440339	1.15886	up	Cbx5	chromobox homolog 5 (HP1 alpha homolog, Drosophila)	300266	gb:BF398015 /DB_XREF=gi:11383000 /DB_XREF=UI-R-BS2-beg-c-12-0-UI.s1 /CLONE=UI-R-BS2-beg-c-12-0-UI /FEA=EST /CNT=11 /TID=Rn.18377.1 /TIER=Stack /STK=7 /UG=Rn.18377 /UG_TITLE=ESTs, Highly similar to CBX5 MOUSE CHROMOBOX PROTEIN HOMOLOG 5 (M.musculus)	BF398015	ENSRNOG00000036841
1373895_PM_at	0.0210546	1.12732	down	---	---	---	gb:BE118440 /DB_XREF=gi:8510545 /DB_XREF=UI-R-BJ1-azp-f-05-0-UI.s1 /CLONE=UI-R-BJ1-azp-f-05-0-UI /FEA=EST /CNT=11 /TID=Rn.15869.1 /TIER=Stack /STK=7 /UG=Rn.15869 /UG_TITLE=ESTs	BE118440	---
1373899_PM_at	0.00813555	1.10253	down	RGD1309829	similar to dJ842G6.1.1 (novel protein)	296190	gb:BI275244 /DB_XREF=gi:14886898 /DB_XREF=UI-R-CX0-bwr-c-06-0-UI.s1 /CLONE=UI-R-CX0-bwr-c-06-0-UI /FEA=EST /CNT=11 /TID=Rn.44182.1 /TIER=Stack /STK=7 /UG=Rn.44182 /UG_TITLE=ESTs, Weakly similar to biotin biosynthesis; reaction prior to pimeloyl CoA (Escherichia coli K12) (E.coli)	BI275244	ENSRNOG00000004784
1373917_PM_at	0.00635573	1.26969	down	Etf1	Eukaryotic translation termination factor 1	307503	gb:BE100459 /DB_XREF=gi:8492352 /DB_XREF=UI-R-BJ1-atv-f-12-0-UI.s1 /CLONE=UI-R-BJ1-atv-f-12-0-UI /FEA=EST /CNT=11 /TID=Rn.11779.1 /TIER=Stack /STK=7 /UG=Rn.11779 /UG_TITLE=ESTs	BE100459	---
1373929_PM_at	0.0189318	1.11239	down	Mrps7	mitochondrial ribosomal protein S7	113958	gb:BI279787 /DB_XREF=gi:14927939 /DB_XREF=UI-R-CU0s-cbq-h-04-0-UI.s1 /CLONE=UI-R-CU0s-cbq-h-04-0-UI /FEA=EST /CNT=10 /TID=Rn.24879.1 /TIER=Stack /STK=7 /UG=Rn.24879 /UG_TITLE=ESTs, Moderately similar to JC7165 mitochondrial ribosomal protein S7 small chain precursor (H.sapiens)	BI279787	ENSRNOG00000003797
1373942_PM_at	0.0355155	1.10382	down	---	---	---	gb:BF396312 /DB_XREF=gi:11381284 /DB_XREF=UI-R-BS2-bdw-f-12-0-UI.s1 /CLONE=UI-R-BS2-bdw-f-12-0-UI /FEA=EST /CNT=10 /TID=Rn.2860.1 /TIER=Stack /STK=7 /UG=Rn.2860 /UG_TITLE=ESTs	BF396312	---
1373944_PM_at	0.0130831	1.13353	down	---	---	---	gb:AW530292 /DB_XREF=gi:7172706 /DB_XREF=UI-R-BU0-amu-h-09-0-UI.s1 /CLONE=UI-R-BU0-amu-h-09-0-UI /FEA=EST /CNT=10 /TID=Rn.16273.1 /TIER=Stack /STK=7 /UG=Rn.16273 /UG_TITLE=ESTs	AW530292	---
1373982_PM_at	0.0404468	1.07729	down	RGD1306595	similar to hypothetical protein	287554	gb:BM385377 /DB_XREF=gi:18185430 /DB_XREF=UI-R-CN1-clv-o-10-0-UI.s1 /CLONE=UI-R-CN1-clv-o-10-0-UI /FEA=EST /CNT=10 /TID=Rn.16586.1 /TIER=Stack /STK=7 /UG=Rn.16586 /UG_TITLE=ESTs	BM385377	ENSRNOG00000004000
1374002_PM_at	0.00373342	1.18742	up	LOC100192313	hypothetical protein LOC100192313	100192313	gb:AI045904 /DB_XREF=gi:3292723 /DB_XREF=UI-R-C0-jq-f-05-0-UI.s2 /CLONE=UI-R-C0-jq-f-05-0-UI /FEA=EST /CNT=9 /TID=Rn.18346.1 /TIER=Stack /STK=7 /UG=Rn.18346 /UG_TITLE=ESTs	AI045904	---
1374016_PM_at	0.0351106	1.1116	up	Lpar1	lysophosphatidic acid receptor 1	116744	gb:AI502597 /DB_XREF=gi:4400448 /DB_XREF=UI-R-C2-nl-b-12-0-UI.s1 /CLONE=UI-R-C2-nl-b-12-0-UI /FEA=EST /CNT=9 /TID=Rn.23581.1 /TIER=Stack /STK=7 /UG=Rn.23581 /UG_TITLE=ESTs	AI502597	ENSRNOG00000013656
1374018_PM_at	0.0321233	1.19388	down	Ascc2	activating signal cointegrator 1 complex subunit 2	498402	gb:AA851212 /DB_XREF=gi:2938752 /DB_XREF=EST193980 /CLONE=RPLAD86 /FEA=EST /CNT=9 /TID=Rn.866.1 /TIER=Stack /STK=7 /UG=Rn.866 /UG_TITLE=ESTs, Moderately similar to AC004882 7 similar to CAA16821 (H.sapiens)	AA851212	---
1374033_PM_at	0.0307502	1.17999	down	Psmb10	proteasome (prosome, macropain) subunit, beta type 10	291983	gb:BG373505 /DB_XREF=gi:13270042 /DB_XREF=UI-R-CS0-bsd-e-11-0-UI.s1 /CLONE=UI-R-CS0-bsd-e-11-0-UI /FEA=EST /CNT=9 /TID=Rn.24968.1 /TIER=Stack /STK=7 /UG=Rn.24968 /UG_TITLE=ESTs, Weakly similar to proteasome (prosome, macropain) subunit, beta type, 7 (Rattus norvegicus) (R.norvegicus)	BG373505	ENSRNOG00000019494
1374039_PM_at	0.0433796	1.16873	down	Car14	carbonic anhydrase 14	791259	gb:BI289989 /DB_XREF=gi:14948131 /DB_XREF=UI-R-DK0-cfq-e-09-0-UI.s1 /CLONE=UI-R-DK0-cfq-e-09-0-UI /FEA=EST /CNT=9 /TID=Rn.22160.1 /TIER=Stack /STK=7 /UG=Rn.22160 /UG_TITLE=ESTs, Moderately similar to CAHE MOUSE CARBONIC ANHYDRASE XIV PRECURSOR (M.musculus)	BI289989	ENSRNOG00000023162
1374043_PM_at	0.0324586	1.1198	down	Gramd3	GRAM domain containing 3	307288	gb:AI317841 /DB_XREF=gi:4033108 /DB_XREF=EST234512 /CLONE=RPPAA53 /FEA=EST /CNT=9 /TID=Rn.16174.1 /TIER=Stack /STK=7 /UG=Rn.16174 /UG_TITLE=ESTs	AI317841	ENSRNOG00000015225
1374065_PM_at	0.0487278	1.18145	down	---	---	---	gb:BG378920 /DB_XREF=gi:13303392 /DB_XREF=UI-R-CV1-bvu-e-07-0-UI.s1 /CLONE=UI-R-CV1-bvu-e-07-0-UI /FEA=EST /CNT=13 /TID=Rn.38245.1 /TIER=Stack /STK=7 /UG=Rn.38245 /UG_TITLE=ESTs	BG378920	---
1374071_PM_at	0.00549125	1.11958	down	Fam118a	family with sequence similarity 118, member A	300120	gb:BG670800 /DB_XREF=gi:13892899 /DB_XREF=DRNBFG04 /CLONE=DRNBFG04 /FEA=EST /CNT=11 /TID=Rn.36745.1 /TIER=Stack /STK=7 /UG=Rn.36745 /UG_TITLE=ESTs	BG670800	---
1374095_PM_at	0.0229554	1.09978	down	---	---	---	gb:BM385244 /DB_XREF=gi:18185297 /DB_XREF=UI-R-EB1-clf-l-15-0-UI.s1 /CLONE=UI-R-EB1-clf-l-15-0-UI /FEA=EST /CNT=9 /TID=Rn.3400.1 /TIER=Stack /STK=7 /UG=Rn.3400 /UG_TITLE=ESTs, Moderately similar to N-acetylgalactosaminyltransferase T-6 (M.musculus)	BM385244	---
1374100_PM_at	0.0105422	1.16959	down	---	---	---	gb:AI102771 /DB_XREF=gi:3707457 /DB_XREF=EST212060 /CLONE=REMBS29 /FEA=EST /CNT=9 /TID=Rn.8384.1 /TIER=Stack /STK=7 /UG=Rn.8384 /UG_TITLE=ESTs	AI102771	---
1374132_PM_at	0.0213578	1.08598	down	---	---	---	gb:BI294788 /DB_XREF=gi:14957584 /DB_XREF=UI-R-DK0-cec-b-07-0-UI.s1 /CLONE=UI-R-DK0-cec-b-07-0-UI /FEA=EST /CNT=8 /TID=Rn.24195.1 /TIER=Stack /STK=7 /UG=Rn.24195 /UG_TITLE=ESTs	BI294788	---
1374156_PM_at	0.0399789	1.14007	down	Mpp5	membrane protein, palmitoylated 5 (MAGUK p55 subfamily member 5)	314259	gb:BE108018 /DB_XREF=gi:8500123 /DB_XREF=UI-R-CA0-awz-d-12-0-UI.s1 /CLONE=UI-R-CA0-awz-d-12-0-UI /FEA=EST /CNT=8 /TID=Rn.8181.1 /TIER=Stack /STK=7 /UG=Rn.8181 /UG_TITLE=ESTs	BE108018	ENSRNOG00000008788
1374177_PM_at	0.00422278	1.09577	down	Taf13	TAF13 RNA polymerase II, TATA box binding protein (TBP)-associated factor	310784	gb:AI230912 /DB_XREF=gi:3814799 /DB_XREF=EST227607 /CLONE=REMDC89 /FEA=EST /CNT=8 /TID=Rn.15054.1 /TIER=Stack /STK=7 /UG=Rn.15054 /UG_TITLE=ESTs	AI230912	ENSRNOG00000020315
1374183_PM_at	0.00802596	1.14083	down	Eapp	E2F-associated phosphoprotein	299043	gb:AI705068 /DB_XREF=gi:4992968 /DB_XREF=UI-R-G0-uj-g-06-0-UI.s2 /CLONE=UI-R-G0-uj-g-06-0-UI /FEA=EST /CNT=8 /TID=Rn.41077.1 /TIER=Stack /STK=7 /UG=Rn.41077 /UG_TITLE=ESTs, Weakly similar to F48E8.2.p (Caenorhabditis elegans) (C.elegans)	AI705068	ENSRNOG00000004509
1374212_PM_at	0.0371101	1.12108	down	---	---	---	gb:AI012753 /DB_XREF=gi:3226585 /DB_XREF=EST207204 /CLONE=RPLBB24 /FEA=EST /CNT=8 /TID=Rn.14344.1 /TIER=Stack /STK=7 /UG=Rn.14344 /UG_TITLE=ESTs	AI012753	---
1374214_PM_at	0.0363787	1.19982	down	---	---	---	gb:AI235359 /DB_XREF=gi:3828865 /DB_XREF=EST231921 /CLONE=ROVCQ85 /FEA=EST /CNT=8 /TID=Rn.18988.1 /TIER=Stack /STK=7 /UG=Rn.18988 /UG_TITLE=ESTs	AI235359	---
1374218_PM_at	0.00211246	1.19623	down	LOC685244	similar to IQ motif and Sec7 domain 2	685244	gb:BG379491 /DB_XREF=gi:13303963 /DB_XREF=UI-R-CS0-bth-e-07-0-UI.s1 /CLONE=UI-R-CS0-bth-e-07-0-UI /FEA=EST /CNT=8 /TID=Rn.12018.1 /TIER=Stack /STK=7 /UG=Rn.12018 /UG_TITLE=ESTs	BG379491	---
1374219_PM_at	0.0365456	1.13512	down	Disp1	dispatched homolog 1 (Drosophila)	289338	gb:BI295135 /DB_XREF=gi:14958278 /DB_XREF=UI-R-DK0-ceg-c-01-0-UI.s1 /CLONE=UI-R-DK0-ceg-c-01-0-UI /FEA=EST /CNT=8 /TID=Rn.41748.1 /TIER=Stack /STK=7 /UG=Rn.41748 /UG_TITLE=ESTs, Weakly similar to T42693 hypothetical protein DKFZp434I0428.1 (H.sapiens)	BI295135	ENSRNOG00000003635
1374220_PM_at	0.0286956	1.16857	up	Ccny	cyclin Y	361261	gb:AI599176 /DB_XREF=gi:4608224 /DB_XREF=EST250879 /CLONE=REMET54 /FEA=EST /CNT=8 /TID=Rn.65539.1 /TIER=Stack /STK=7 /UG=Rn.65539 /UG_TITLE=ESTs	AI599176	ENSRNOG00000018123
1374236_PM_at	0.0498175	1.13079	up	---	---	---	gb:BI295858 /DB_XREF=gi:14959725 /DB_XREF=UI-R-DK0-cfb-e-04-0-UI.s1 /CLONE=UI-R-DK0-cfb-e-04-0-UI /FEA=EST /CNT=7 /TID=Rn.26644.1 /TIER=Stack /STK=7 /UG=Rn.26644 /UG_TITLE=ESTs	BI295858	---
1374262_PM_at	0.029781	1.1836	down	---	---	---	gb:BF396371 /DB_XREF=gi:11381343 /DB_XREF=UI-R-BS2-bdx-d-03-0-UI.s1 /CLONE=UI-R-BS2-bdx-d-03-0-UI /FEA=EST /CNT=7 /TID=Rn.32615.1 /TIER=Stack /STK=7 /UG=Rn.32615 /UG_TITLE=ESTs	BF396371	---
1374264_PM_at	0.0367278	1.09071	down	Orc5l	origin recognition complex, subunit 5-like (yeast)	362304	gb:BM384751 /DB_XREF=gi:18184804 /DB_XREF=UI-R-CN1-cjl-n-05-0-UI.s2 /CLONE=UI-R-CN1-cjl-n-05-0-UI /FEA=EST /CNT=7 /TID=Rn.16901.1 /TIER=Stack /STK=7 /UG=Rn.16901 /UG_TITLE=ESTs	BM384751	ENSRNOG00000011519
1374271_PM_at	0.0457973	1.14855	up	---	---	---	gb:AW528864 /DB_XREF=gi:7171278 /DB_XREF=UI-R-BT1-akj-e-03-0-UI.s1 /CLONE=UI-R-BT1-akj-e-03-0-UI /FEA=EST /CNT=7 /TID=Rn.27616.1 /TIER=Stack /STK=7 /UG=Rn.27616 /UG_TITLE=ESTs	AW528864	---
1374272_PM_at	0.0294681	1.18164	down	LOC679383	similar to DNA segment, Chr 5, ERATO Doi 135, expressed	679383	gb:BI280268 /DB_XREF=gi:14928881 /DB_XREF=UI-R-DE0-cag-a-01-0-UI.s1 /CLONE=UI-R-DE0-cag-a-01-0-UI /FEA=EST /CNT=7 /TID=Rn.16280.1 /TIER=Stack /STK=7 /UG=Rn.16280 /UG_TITLE=ESTs	BI280268	---
1374279_PM_at	0.0220756	1.04529	down	Scye1	small inducible cytokine subfamily E, member 1	114632	gb:BI288244 /DB_XREF=gi:14944640 /DB_XREF=UI-R-DK0-ccy-e-11-0-UI.s1 /CLONE=UI-R-DK0-ccy-e-11-0-UI /FEA=EST /CNT=7 /TID=Rn.3192.1 /TIER=Stack /STK=7 /UG=Rn.3192 /UG_TITLE=ESTs, Highly similar to A55053 endothelial monocyte-activating protein II precursor - mouse (M.musculus)	BI288244	ENSRNOG00000011384
1374288_PM_at	0.0427443	1.07999	down	Ftsj3	FtsJ homolog 3 (E. coli)	303608	gb:BG374267 /DB_XREF=gi:13298739 /DB_XREF=UI-R-CV1-bsn-d-01-0-UI.s1 /CLONE=UI-R-CV1-bsn-d-01-0-UI /FEA=EST /CNT=7 /TID=Rn.47509.1 /TIER=Stack /STK=7 /UG=Rn.47509 /UG_TITLE=ESTs	BG374267	ENSRNOG00000009857
1374296_PM_at	0.00427442	1.09118	up	---	---	---	gb:BM387574 /DB_XREF=gi:18187627 /DB_XREF=UI-R-CN1-cjl-m-20-0-UI.s1 /CLONE=UI-R-CN1-cjl-m-20-0-UI /FEA=EST /CNT=7 /TID=Rn.33512.1 /TIER=Stack /STK=7 /UG=Rn.33512 /UG_TITLE=ESTs	BM387574	---
1374307_PM_at	0.0272076	1.11772	up	---	---	---	gb:AI236027 /DB_XREF=gi:4136151 /DB_XREF=EST232589 /CLONE=ROVDA41 /FEA=EST /CNT=7 /TID=Rn.12600.1 /TIER=Stack /STK=7 /UG=Rn.12600 /UG_TITLE=ESTs	AI236027	---
1374321_PM_at	0.0477535	1.06575	up	RGD1560108	similar to RIKEN cDNA 2700081O15	499309	gb:AI227598 /DB_XREF=gi:3811494 /DB_XREF=EST224302 /CLONE=RBRCJ21 /FEA=EST /CNT=7 /TID=Rn.11652.1 /TIER=Stack /STK=7 /UG=Rn.11652 /UG_TITLE=ESTs	AI227598	---
1374323_PM_at	0.042444	1.06656	down	Bccip	BRCA2 and CDKN1A interacting protein	361666	gb:BM389139 /DB_XREF=gi:18189192 /DB_XREF=UI-R-DZ0-cko-i-03-0-UI.s1 /CLONE=UI-R-DZ0-cko-i-03-0-UI /FEA=EST /CNT=7 /TID=Rn.7853.1 /TIER=Stack /STK=7 /UG=Rn.7853 /UG_TITLE=ESTs, Moderately similar to T47184 hypothetical protein DKFZp434F1526.1 (H.sapiens)	BM389139	ENSRNOG00000018066
1374396_PM_at	0.0348699	1.06757	down	Atp6v1c1	ATPase, H+ transporting, lysosomal V1 subunit C1	299971	gb:BI293306 /DB_XREF=gi:14954686 /DB_XREF=UI-R-DK0-cdn-d-10-0-UI.s1 /CLONE=UI-R-DK0-cdn-d-10-0-UI /FEA=EST /CNT=28 /TID=Rn.32254.1 /TIER=Stack /STK=6 /UG=Rn.32254 /UG_TITLE=ESTs, Highly similar to VATC_MOUSE VACUOLAR ATP SYNTHASE SUBUNIT C (V-ATPASE C SUBUNIT) (VACUOLAR PROTON PUMP C SUBUNIT) (M.musculus)	BI293306	ENSRNOG00000004846
1374404_PM_at	0.0131668	1.34368	up	Jun	Jun oncogene	24516	gb:BI288619 /DB_XREF=gi:14945383 /DB_XREF=UI-R-DK0-cdd-a-04-0-UI.s1 /CLONE=UI-R-DK0-cdd-a-04-0-UI /FEA=EST /CNT=25 /TID=Rn.7672.1 /TIER=Stack /STK=6 /UG=Rn.7672 /UG_TITLE=ESTs	BI288619	---
1374420_PM_at	0.0306121	1.09537	down	RGD1308874	similar to RIKEN cDNA 2310001A20	366227	gb:BE117936 /DB_XREF=gi:8510041 /DB_XREF=UI-R-BS1-azm-g-02-0-UI.s1 /CLONE=UI-R-BS1-azm-g-02-0-UI /FEA=EST /CNT=13 /TID=Rn.2352.1 /TIER=Stack /STK=6 /UG=Rn.2352 /UG_TITLE=ESTs, Weakly similar to JC7260 strictosidine synthase (EC 4.3.3.2) homolog 2 - fruit fly (Drosophila melanogaster) (D.melanogaster)	BE117936	ENSRNOG00000006795
1374425_PM_at	0.0382144	1.08961	up	Tle1	transducin-like enhancer of split 1 (E(sp1) homolog, Drosophila)	362533	gb:BG380534 /DB_XREF=gi:13305006 /DB_XREF=UI-R-CT0-bty-e-01-0-UI.s1 /CLONE=UI-R-CT0-bty-e-01-0-UI /FEA=EST /CNT=15 /TID=Rn.6875.1 /TIER=Stack /STK=6 /UG=Rn.6875 /UG_TITLE=ESTs, Highly similar to TLE4 RAT TRANSDUCIN-LIKE ENHANCER PROTEIN 4 (R.norvegicus)	BG380534	ENSRNOG00000005882
1374434_PM_at	0.0457048	1.13231	down	LOC498222	similar to specifically androgen-regulated protein	498222	gb:BI291703 /DB_XREF=gi:14951504 /DB_XREF=UI-R-DM0-cis-o-04-0-UI.s1 /CLONE=UI-R-DM0-cis-o-04-0-UI /FEA=EST /CNT=12 /TID=Rn.28408.1 /TIER=Stack /STK=6 /UG=Rn.28408 /UG_TITLE=ESTs	BI291703	---
1374440_PM_at	0.00948743	1.13179	down	Hsd17b11	hydroxysteroid (17-beta) dehydrogenase 11	289456	gb:BE098506 /DB_XREF=gi:8490370 /DB_XREF=UI-R-BJ1-atc-g-05-0-UI.s1 /CLONE=UI-R-BJ1-atc-g-05-0-UI /FEA=EST /CNT=14 /TID=Rn.6316.1 /TIER=Stack /STK=6 /UG=Rn.6316 /UG_TITLE=ESTs, Weakly similar to DHI1 RAT CORTICOSTEROID 11-BETA-DEHYDROGENASE, ISOZYME 1 (R.norvegicus)	BE098506	ENSRNOG00000002210
1374457_PM_at	0.0124622	1.12776	down	Sptlc2	serine palmitoyltransferase, long chain base subunit 2	366697	gb:AI180194 /DB_XREF=gi:3730832 /DB_XREF=EST223935 /CLONE=RSPCR72 /FEA=EST /CNT=11 /TID=Rn.31467.1 /TIER=Stack /STK=6 /UG=Rn.31467 /UG_TITLE=ESTs, Highly similar to JC5180 serine C-palmitoyltransferase (M.musculus)	AI180194	---
1374465_PM_at	0.00553511	1.14093	down	Uxt	ubiquitously expressed transcript	299313	gb:AI237098 /DB_XREF=gi:3830604 /DB_XREF=EST233660 /CLONE=ROVDO63 /FEA=EST /CNT=15 /TID=Rn.8375.1 /TIER=Stack /STK=6 /UG=Rn.8375 /UG_TITLE=ESTs, Highly similar to ubiquitously expressed transcript (Mus musculus) (M.musculus)	AI237098	ENSRNOG00000009893
1374480_PM_at	0.0267062	1.09436	up	Daam1	dishevelled associated activator of morphogenesis 1	314212	gb:BE107255 /DB_XREF=gi:8499360 /DB_XREF=UI-R-BS1-ayr-f-09-0-UI.s1 /CLONE=UI-R-BS1-ayr-f-09-0-UI /FEA=EST /CNT=10 /TID=Rn.28222.1 /TIER=Stack /STK=6 /UG=Rn.28222 /UG_TITLE=ESTs	BE107255	---
1374488_PM_at	0.0160607	1.12671	down	Gramd1b	GRAM domain containing 1B	300644	gb:AI175700 /DB_XREF=gi:3726338 /DB_XREF=EST219261 /CLONE=ROVBD93 /FEA=EST /CNT=10 /TID=Rn.21286.1 /TIER=Stack /STK=6 /UG=Rn.21286 /UG_TITLE=ESTs, Weakly similar to T43471 hypothetical protein DKFZp434C0328.1 (H.sapiens)	AI175700	ENSRNOG00000007166
1374491_PM_at	0.00376781	1.22448	down	Cmtm8	CKLF-like MARVEL transmembrane domain containing 8	301045	gb:AI408279 /DB_XREF=gi:4251783 /DB_XREF=EST236569 /CLONE=ROVET92 /FEA=EST /CNT=10 /TID=Rn.8312.1 /TIER=Stack /STK=6 /UG=Rn.8312 /UG_TITLE=ESTs, Weakly similar to plasmolipin (Rattus norvegicus) (R.norvegicus)	AI408279	ENSRNOG00000011201
1374503_PM_at	0.0420624	1.08742	up	Pbx3	pre-B-cell leukemia homeobox 3	311876	gb:AI709810 /DB_XREF=gi:4999586 /DB_XREF=UI-R-C3-tj-h-10-0-UI.s1 /CLONE=UI-R-C3-tj-h-10-0-UI /FEA=EST /CNT=13 /TID=Rn.28050.1 /TIER=Stack /STK=6 /UG=Rn.28050 /UG_TITLE=ESTs	AI709810	ENSRNOG00000022162
1374507_PM_at	0.0296542	1.1007	up	Ube4b	ubiquitination factor E4B	298652	gb:BE096671 /DB_XREF=gi:8487561 /DB_XREF=UI-R-BU0-api-e-02-0-UI.s1 /CLONE=UI-R-BU0-api-e-02-0-UI /FEA=EST /CNT=12 /TID=Rn.19289.1 /TIER=Stack /STK=6 /UG=Rn.19289 /UG_TITLE=ESTs	BE096671	---
1374511_PM_at	0.0425458	1.23004	down	---	---	---	gb:BI291354 /DB_XREF=gi:14950806 /DB_XREF=UI-R-CV2-cgp-a-06-0-UI.s1 /CLONE=UI-R-CV2-cgp-a-06-0-UI /FEA=EST /CNT=11 /TID=Rn.17289.1 /TIER=Stack /STK=6 /UG=Rn.17289 /UG_TITLE=ESTs	BI291354	---
1374515_PM_at	0.0102374	1.1309	down	RGD1306437	similar to RIKEN cDNA 6330409N04	290303	gb:AA848948 /DB_XREF=gi:2936488 /DB_XREF=EST191710 /CLONE=RLUAI29 /FEA=EST /CNT=10 /TID=Rn.1242.1 /TIER=Stack /STK=6 /UG=Rn.1242 /UG_TITLE=ESTs, Weakly similar to F18H3.1.p (Caenorhabditis elegans) (C.elegans)	AA848948	ENSRNOG00000015095
1374517_PM_at	0.00177447	1.11375	down	Recql	RecQ protein-like (DNA helicase Q1-like)	312824	gb:AA891612 /DB_XREF=gi:3018491 /DB_XREF=EST195415 /CLONE=RKIAE58 /FEA=EST /CNT=10 /TID=Rn.13818.1 /TIER=Stack /STK=6 /UG=Rn.13818 /UG_TITLE=ESTs, Weakly similar to T19486 hypothetical protein C26D10.4 - Caenorhabditis elegans (C.elegans)	AA891612	---
1374518_PM_at	0.000128995	1.22047	down	Tmem77	transmembrane protein 77	362011	gb:AA818113 /DB_XREF=gi:4198628 /DB_XREF=UI-R-A0-am-g-02-0-UI.s1 /CLONE=UI-R-A0-am-g-02-0-UI /FEA=EST /CNT=10 /TID=Rn.1279.1 /TIER=Stack /STK=6 /UG=Rn.1279 /UG_TITLE=ESTs, Weakly similar to T13747 hypothetical protein EG:22E5.9 - fruit fly (D.melanogaster)	AA818113	ENSRNOG00000017744
1374520_PM_at	0.000650193	1.17756	down	Alpk2	alpha-kinase 2	498875	gb:BF287226 /DB_XREF=gi:11218282 /DB_XREF=EST451803 /CLONE=RGIGD09 /FEA=EST /CNT=10 /TID=Rn.24564.1 /TIER=Stack /STK=6 /UG=Rn.24564 /UG_TITLE=ESTs	BF287226	---
1374551_PM_at	0.0378168	1.19151	down	Ifi35	interferon-induced protein 35	287719	gb:BM388891 /DB_XREF=gi:18188944 /DB_XREF=UI-R-DZ0-ckn-o-24-0-UI.s1 /CLONE=UI-R-DZ0-ckn-o-24-0-UI /FEA=EST /CNT=9 /TID=Rn.44680.1 /TIER=Stack /STK=6 /UG=Rn.44680 /UG_TITLE=ESTs, Moderately similar to JC5262 leucine zipper protein IFP35 (H.sapiens)	BM388891	ENSRNOG00000020678
1374571_PM_at	0.00589016	1.11462	down	Pigx	phosphatidylinositol glycan anchor biosynthesis, class X	288041	gb:AI172192 /DB_XREF=gi:3712232 /DB_XREF=EST218188 /CLONE=RMUBW09 /FEA=EST /CNT=9 /TID=Rn.34037.1 /TIER=Stack /STK=6 /UG=Rn.34037 /UG_TITLE=ESTs	AI172192	ENSRNOG00000033623
1374576_PM_at	0.0296961	1.17476	down	---	---	---	gb:BF283857 /DB_XREF=gi:11214927 /DB_XREF=EST448448 /CLONE=RGIEH45 /FEA=EST /CNT=9 /TID=Rn.2573.1 /TIER=Stack /STK=6 /UG=Rn.2573 /UG_TITLE=ESTs	BF283857	ENSRNOG00000024266
1374594_PM_at	0.0382954	1.23712	down	LOC363060	similar to RIKEN cDNA 1600029D21	363060	gb:AI599133 /DB_XREF=gi:4608181 /DB_XREF=EST250836 /CLONE=REMEB39 /FEA=EST /CNT=11 /TID=Rn.17221.1 /TIER=Stack /STK=6 /UG=Rn.17221 /UG_TITLE=ESTs	AI599133	---
1374604_PM_at	0.015558	1.17445	down	Mfsd9	major facilitator superfamily domain containing 9	316356	gb:BF399504 /DB_XREF=gi:11384512 /DB_XREF=UI-R-CA1-bjb-f-08-0-UI.s1 /CLONE=UI-R-CA1-bjb-f-08-0-UI /FEA=EST /CNT=9 /TID=Rn.18430.1 /TIER=Stack /STK=6 /UG=Rn.18430 /UG_TITLE=ESTs	BF399504	---
1374606_PM_at	0.0137831	1.10088	down	---	---	---	gb:BF283073 /DB_XREF=gi:11214143 /DB_XREF=EST447664 /CLONE=RGIDX14 /FEA=EST /CNT=9 /TID=Rn.24676.1 /TIER=Stack /STK=6 /UG=Rn.24676 /UG_TITLE=ESTs	BF283073	---
1374634_PM_at	0.0169481	1.15818	down	Pih1d2	PIH1 domain containing 2	315645	gb:AA818131 /DB_XREF=gi:4198645 /DB_XREF=UI-R-A0-am-h-12-0-UI.s1 /CLONE=UI-R-A0-am-h-12-0-UI /FEA=EST /CNT=8 /TID=Rn.16460.1 /TIER=Stack /STK=6 /UG=Rn.16460 /UG_TITLE=ESTs	AA818131	ENSRNOG00000009965
1374660_PM_at	0.0145745	1.07593	down	Nsmce4a	non-SMC element 4 homolog A (S. cerevisiae)	293528	gb:BM385193 /DB_XREF=gi:18185246 /DB_XREF=UI-R-CN1-cjs-d-02-0-UI.s2 /CLONE=UI-R-CN1-cjs-d-02-0-UI /FEA=EST /CNT=8 /TID=Rn.6503.1 /TIER=Stack /STK=6 /UG=Rn.6503 /UG_TITLE=ESTs, Weakly similar to H21P03.2.p (Caenorhabditis elegans) (C.elegans)	BM385193	ENSRNOG00000020452
1374669_PM_at	0.048525	1.0592	down	Brwd2	bromodomain and WD repeat domain containing 2	309016	gb:AI600234 /DB_XREF=gi:4609282 /DB_XREF=EST251937 /CLONE=REMEN69 /FEA=EST /CNT=8 /TID=Rn.40203.1 /TIER=Stack /STK=6 /UG=Rn.40203 /UG_TITLE=ESTs	AI600234	---
1374671_PM_at	0.0256767	1.17784	down	Traf3ip2	Traf3 interacting protein 2	361857	gb:BI290057 /DB_XREF=gi:14948267 /DB_XREF=UI-R-DK0-cfr-d-01-0-UI.s1 /CLONE=UI-R-DK0-cfr-d-01-0-UI /FEA=EST /CNT=8 /TID=Rn.9031.1 /TIER=Stack /STK=6 /UG=Rn.9031 /UG_TITLE=ESTs, Highly similar to T08794 hypothetical protein DKFZp586G0522.1 (H.sapiens)	BI290057	ENSRNOG00000000595
1374684_PM_at	0.0257144	1.09607	down	---	---	---	gb:AI228978 /DB_XREF=gi:3812865 /DB_XREF=EST225673 /CLONE=RBRDC46 /FEA=EST /CNT=8 /TID=Rn.16704.1 /TIER=Stack /STK=6 /UG=Rn.16704 /UG_TITLE=ESTs	AI228978	---
1374699_PM_at	0.00553952	1.17981	up	Fam84a	family with sequence similarity 84, member A	313969	gb:BI286340 /DB_XREF=gi:14940889 /DB_XREF=UI-R-DE0-caj-g-08-0-UI.s1 /CLONE=UI-R-DE0-caj-g-08-0-UI /FEA=EST /CNT=12 /TID=Rn.21319.1 /TIER=Stack /STK=6 /UG=Rn.21319 /UG_TITLE=ESTs	BI286340	---
1374703_PM_at	0.000564147	1.24208	up	---	---	---	gb:BI304209 /DB_XREF=gi:14980489 /DB_XREF=UI-R-DR0-cjc-n-22-0-UI.s1 /CLONE=UI-R-DR0-cjc-n-22-0-UI /FEA=EST /CNT=10 /TID=Rn.23770.1 /TIER=Stack /STK=6 /UG=Rn.23770 /UG_TITLE=ESTs	BI304209	---
1374709_PM_at	0.0344076	1.07704	up	---	---	---	gb:AI406795 /DB_XREF=gi:4250299 /DB_XREF=EST235082 /CLONE=RBRDI44 /FEA=EST /CNT=9 /TID=Rn.19878.1 /TIER=Stack /STK=6 /UG=Rn.19878 /UG_TITLE=ESTs	AI406795	---
1374711_PM_at	0.0402471	1.08957	down	Cpsf3	cleavage and polyadenylation specificity factor 3	298916	gb:BF283512 /DB_XREF=gi:11214582 /DB_XREF=EST448103 /CLONE=RGIED33 /FEA=EST /CNT=9 /TID=Rn.14820.1 /TIER=Stack /STK=6 /UG=Rn.14820 /UG_TITLE=ESTs	BF283512	ENSRNOG00000007194
1374712_PM_at	0.0359107	1.17672	up	Psmd11	proteasome (prosome, macropain) 26S subunit, non-ATPase, 11	303353	gb:AA946509 /DB_XREF=gi:4132829 /DB_XREF=EST202008 /CLONE=ROVAR96 /FEA=EST /CNT=9 /TID=Rn.8203.1 /TIER=Stack /STK=6 /UG=Rn.8203 /UG_TITLE=ESTs, Highly similar to JC6524 26S proteasome regulatory complex chain p44.5 (H.sapiens)	AA946509	---
1374716_PM_at	0.0386823	1.08497	down	Rrp15	ribosomal RNA processing 15 homolog (S. cerevisiae)	360895	gb:AI411620 /DB_XREF=gi:4255124 /DB_XREF=EST239914 /CLONE=ROVES41 /FEA=EST /CNT=9 /TID=Rn.16050.1 /TIER=Stack /STK=6 /UG=Rn.16050 /UG_TITLE=ESTs	AI411620	ENSRNOG00000002450
1374738_PM_at	0.0176428	1.1524	down	Sdccag10	serologically defined colon cancer antigen 10	361887	gb:BF416387 /DB_XREF=gi:11404376 /DB_XREF=UI-R-CA0-bks-a-06-0-UI.s1 /CLONE=UI-R-CA0-bks-a-06-0-UI /FEA=EST /CNT=8 /TID=Rn.26961.1 /TIER=Stack /STK=6 /UG=Rn.26961 /UG_TITLE=ESTs	BF416387	ENSRNOG00000013252
1374742_PM_at	0.04164	1.16659	up	---	---	---	gb:AA943983 /DB_XREF=gi:3103899 /DB_XREF=EST199482 /CLONE=REMAA10 /FEA=EST /CNT=8 /TID=Rn.24941.1 /TIER=Stack /STK=6 /UG=Rn.24941 /UG_TITLE=ESTs	AA943983	---
1374743_PM_at	0.0246631	1.1183	down	Inadl	InaD-like (Drosophila)	313382	gb:BE115056 /DB_XREF=gi:8507161 /DB_XREF=UI-R-BJ1-awu-g-03-0-UI.s1 /CLONE=UI-R-BJ1-awu-g-03-0-UI /FEA=EST /CNT=8 /TID=Rn.35245.1 /TIER=Stack /STK=6 /UG=Rn.35245 /UG_TITLE=ESTs	BE115056	---
1374748_PM_at	0.0161115	1.09428	down	Shmt1	serine hydroxymethyltransferase 1 (soluble)	287379	gb:AI010087 /DB_XREF=gi:4133156 /DB_XREF=EST204538 /CLONE=RLUBT56 /FEA=EST /CNT=7 /TID=Rn.3684.1 /TIER=Stack /STK=6 /UG=Rn.3684 /UG_TITLE=ESTs	AI010087	---
1374764_PM_at	0.0475308	1.09922	down	Nol14	nucleolar protein 14	289724	gb:BG378053 /DB_XREF=gi:13302525 /DB_XREF=UI-R-CT0-bvn-c-09-0-UI.s1 /CLONE=UI-R-CT0-bvn-c-09-0-UI /FEA=EST /CNT=7 /TID=Rn.12567.1 /TIER=Stack /STK=6 /UG=Rn.12567 /UG_TITLE=ESTs, Moderately similar to JE0188 RES4-25 protein (H.sapiens)	BG378053	ENSRNOG00000012147
1374767_PM_at	0.0200216	1.1924	down	Npepo	aminopeptidase O	290963	gb:AI105450 /DB_XREF=gi:3705207 /DB_XREF=EST214739 /CLONE=RKIBK53 /FEA=EST /CNT=7 /TID=Rn.263.1 /TIER=Stack /STK=6 /UG=Rn.263 /UG_TITLE=ESTs	AI105450	ENSRNOG00000017505
1374770_PM_at	0.0300398	1.09092	down	Asah1	N-acylsphingosine amidohydrolase (acid ceramidase) 1	84431	gb:AA800062 /DB_XREF=gi:2863017 /DB_XREF=EST189559 /CLONE=RHEAI95 /FEA=EST /CNT=7 /TID=Rn.4158.1 /TIER=Stack /STK=6 /UG=Rn.4158 /UG_TITLE=ESTs	AA800062	ENSRNOG00000010034
1374782_PM_at	0.0129012	1.15454	down	---	---	---	gb:BF419834 /DB_XREF=gi:11407823 /DB_XREF=UI-R-CA0-bpg-g-07-0-UI.s1 /CLONE=UI-R-CA0-bpg-g-07-0-UI /FEA=EST /CNT=7 /TID=Rn.51810.1 /TIER=Stack /STK=6 /UG=Rn.51810 /UG_TITLE=ESTs	BF419834	---
1374783_PM_at	0.0152652	1.15079	up	---	---	---	gb:BI301183 /DB_XREF=gi:14977463 /DB_XREF=UI-R-DK0-cdx-c-07-0-UI.s2 /CLONE=UI-R-DK0-cdx-c-07-0-UI /FEA=EST /CNT=7 /TID=Rn.1341.1 /TIER=Stack /STK=6 /UG=Rn.1341 /UG_TITLE=ESTs	BI301183	---
1374792_PM_at	0.0160259	1.1181	down	Nol7	nucleolar protein 7	498727	gb:BM389058 /DB_XREF=gi:18189111 /DB_XREF=UI-R-DZ0-cko-j-01-0-UI.s1 /CLONE=UI-R-DZ0-cko-j-01-0-UI /FEA=EST /CNT=7 /TID=Rn.31940.1 /TIER=Stack /STK=6 /UG=Rn.31940 /UG_TITLE=ESTs, Weakly similar to T08718 hypothetical protein DKFZp566B153.1 (H.sapiens)	BM389058	---
1374840_PM_at	0.0174388	1.26043	down	RGD1564921	similar to peptidyl prolyl isomerase H	366461	gb:BG377716 /DB_XREF=gi:13302188 /DB_XREF=UI-R-CU0-bva-b-11-0-UI.s1 /CLONE=UI-R-CU0-bva-b-11-0-UI /FEA=EST /CNT=7 /TID=Rn.41174.1 /TIER=Stack /STK=6 /UG=Rn.41174 /UG_TITLE=ESTs, Weakly similar to CYPB RAT PEPTIDYL-PROLYL CIS-TRANS ISOMERASE B PRECURSOR (R.norvegicus)	BG377716	---
1374846_PM_at	0.0226533	1.1115	up	Hexim1	hexamethylene bis-acetamide inducible 1	498008	gb:AI230884 /DB_XREF=gi:3814771 /DB_XREF=EST227579 /CLONE=REMDC41 /FEA=EST /CNT=7 /TID=Rn.18867.1 /TIER=Stack /STK=6 /UG=Rn.18867 /UG_TITLE=ESTs	AI230884	ENSRNOG00000003203
1374856_PM_at	0.0215722	1.15333	up	Bcdin3d	BCDIN3 domain containing	363001	gb:BF396478 /DB_XREF=gi:11381452 /DB_XREF=UI-R-BS2-bdy-f-05-0-UI.s1 /CLONE=UI-R-BS2-bdy-f-05-0-UI /FEA=EST /CNT=7 /TID=Rn.50645.1 /TIER=Stack /STK=6 /UG=Rn.50645 /UG_TITLE=ESTs	BF396478	ENSRNOG00000032608
1374912_PM_at	0.0285001	1.08484	down	Kif2c	kinesin family member 2C	171529	gb:BI274467 /DB_XREF=gi:14885406 /DB_XREF=UI-R-CW0-bwj-c-01-0-UI.s1 /CLONE=UI-R-CW0-bwj-c-01-0-UI /FEA=EST /CNT=7 /TID=Rn.21200.1 /TIER=Stack /STK=6 /UG=Rn.21200 /UG_TITLE=ESTs, Highly similar to T10755 kinesin-related protein 2 - rat (R.norvegicus)	BI274467	---
1374919_PM_at	0.0175273	1.14663	down	Rfc1	replication factor C (activator 1) 1	89809	gb:BE103543 /DB_XREF=gi:8495643 /DB_XREF=UI-R-BX0-ard-d-12-0-UI.s1 /CLONE=UI-R-BX0-ard-d-12-0-UI /FEA=EST /CNT=7 /TID=Rn.6208.1 /TIER=Stack /STK=6 /UG=Rn.6208 /UG_TITLE=ESTs	BE103543	---
1374932_PM_at	0.0282513	1.10939	down	---	---	---	gb:BI282731 /DB_XREF=gi:14933790 /DB_XREF=UI-R-CW0s-cce-e-07-0-UI.s1 /CLONE=UI-R-CW0s-cce-e-07-0-UI /FEA=EST /CNT=6 /TID=Rn.66850.1 /TIER=Stack /STK=6 /UG=Rn.66850 /UG_TITLE=ESTs	BI282731	---
1374948_PM_at	0.0112713	1.19978	down	Tmem106a	transmembrane protein 106A	287722	gb:BI275815 /DB_XREF=gi:14920108 /DB_XREF=UI-R-CX0-bxg-h-08-0-UI.s1 /CLONE=UI-R-CX0-bxg-h-08-0-UI /FEA=EST /CNT=6 /TID=Rn.16484.1 /TIER=Stack /STK=6 /UG=Rn.16484 /UG_TITLE=ESTs	BI275815	ENSRNOG00000023628
1374953_PM_at	0.0324392	1.13688	down	LOC500420	similar to CG12279-PA	500420	gb:AI599484 /DB_XREF=gi:4608532 /DB_XREF=EST251187 /CLONE=REMDX70 /FEA=EST /CNT=6 /TID=Rn.9543.1 /TIER=Stack /STK=6 /UG=Rn.9543 /UG_TITLE=ESTs	AI599484	ENSRNOG00000028185
1374959_PM_at	0.000945813	1.17063	down	Nqo2	NAD(P)H dehydrogenase, quinone 2	291084	gb:AA945624 /DB_XREF=gi:3105540 /DB_XREF=EST201123 /CLONE=RLIAP94 /FEA=EST /CNT=6 /TID=Rn.7882.1 /TIER=Stack /STK=6 /UG=Rn.7882 /UG_TITLE=ESTs, Weakly similar to NAD(P)H DEHYDROGENASE (R.norvegicus)	AA945624	---
1374988_PM_at	0.0301798	1.09306	up	---	---	---	gb:BF390848 /DB_XREF=gi:11375695 /DB_XREF=UI-R-CA1-bci-b-08-0-UI.s1 /CLONE=UI-R-CA1-bci-b-08-0-UI /FEA=EST /CNT=6 /TID=Rn.63145.1 /TIER=Stack /STK=6 /UG=Rn.63145 /UG_TITLE=ESTs	BF390848	---
1374995_PM_at	0.00792429	1.24417	down	Elmo3	engulfment and cell motility 3	291962	gb:BI291645 /DB_XREF=gi:14951385 /DB_XREF=UI-R-DN0-ciu-l-15-0-UI.s1 /CLONE=UI-R-DN0-ciu-l-15-0-UI /FEA=EST /CNT=6 /TID=Rn.20517.1 /TIER=Stack /STK=6 /UG=Rn.20517 /UG_TITLE=ESTs, Weakly similar to Y281_HUMAN HYPOTHETICAL PROTEIN KIAA0281 (H.sapiens)	BI291645	ENSRNOG00000015800
1375012_PM_at	0.0465738	1.20177	up	Pdzd4	PDZ domain containing 4	293856	gb:BF399627 /DB_XREF=gi:11384636 /DB_XREF=UI-R-CA0-bhu-f-02-0-UI.s2 /CLONE=UI-R-CA0-bhu-f-02-0-UI /FEA=EST /CNT=6 /TID=Rn.28086.1 /TIER=Stack /STK=6 /UG=Rn.28086 /UG_TITLE=ESTs	BF399627	---
1375021_PM_at	0.0182594	1.0679	up	---	---	---	gb:BI298773 /DB_XREF=gi:14975053 /DB_XREF=UI-R-CV2-chn-e-07-0-UI.s1 /CLONE=UI-R-CV2-chn-e-07-0-UI /FEA=EST /CNT=6 /TID=Rn.66188.1 /TIER=Stack /STK=6 /UG=Rn.66188 /UG_TITLE=ESTs, Moderately similar to A35098 MHC class III histocompatibility antigen HLA-B-associated transcript 3 (H.sapiens)	BI298773	---
1375036_PM_at	0.0361955	1.07492	up	---	---	---	gb:AI172146 /DB_XREF=gi:3712186 /DB_XREF=EST218141 /CLONE=RMUBV51 /FEA=EST /CNT=6 /TID=Rn.18232.1 /TIER=Stack /STK=6 /UG=Rn.18232 /UG_TITLE=ESTs	AI172146	---
1375060_PM_at	0.0348828	1.13306	down	---	---	---	gb:BE112912 /DB_XREF=gi:8505017 /DB_XREF=UI-R-BJ1-awa-c-08-0-UI.s1 /CLONE=UI-R-BJ1-awa-c-08-0-UI /FEA=EST /CNT=6 /TID=Rn.8751.1 /TIER=Stack /STK=6 /UG=Rn.8751 /UG_TITLE=ESTs	BE112912	---
1375065_PM_at	0.0345614	1.10779	down	---	---	---	gb:BI291326 /DB_XREF=gi:14950760 /DB_XREF=UI-R-CV2-cgo-e-07-0-UI.s1 /CLONE=UI-R-CV2-cgo-e-07-0-UI /FEA=EST /CNT=6 /TID=Rn.53275.1 /TIER=Stack /STK=6 /UG=Rn.53275 /UG_TITLE=ESTs, Weakly similar to TC17 RAT TRANSCRIPTION FACTOR 17 (R.norvegicus)	BI291326	---
1375090_PM_at	0.00509518	1.10291	up	---	---	---	gb:AI579005 /DB_XREF=gi:4563381 /DB_XREF=UI-R-AA0-wk-g-10-0-UI.s1 /CLONE=UI-R-AA0-wk-g-10-0-UI /FEA=EST /CNT=6 /TID=Rn.14814.1 /TIER=Stack /STK=6 /UG=Rn.14814 /UG_TITLE=ESTs	AI579005	---
1375093_PM_at	0.0111893	1.24156	down	Rbks	ribokinase	362706	gb:AI236089 /DB_XREF=gi:3829595 /DB_XREF=EST232651 /CLONE=ROVDB29 /FEA=EST /CNT=6 /TID=Rn.25478.1 /TIER=Stack /STK=6 /UG=Rn.25478 /UG_TITLE=ESTs, Weakly similar to T13380 ribokinase homolog - fruit fly (D.melanogaster)	AI236089	ENSRNOG00000004710
1375095_PM_at	0.014984	1.11019	down	---	---	---	gb:BF394091 /DB_XREF=gi:11378950 /DB_XREF=UI-R-CA0-bgz-a-02-0-UI.s1 /CLONE=UI-R-CA0-bgz-a-02-0-UI /FEA=EST /CNT=6 /TID=Rn.52404.1 /TIER=Stack /STK=6 /UG=Rn.52404 /UG_TITLE=ESTs	BF394091	---
1375123_PM_at	0.0437043	2.34767	up	Sox4	SRY (sex determining region Y)-box 4	364712	gb:BE115519 /DB_XREF=gi:8507624 /DB_XREF=UI-R-BS1-axw-g-10-0-UI.s1 /CLONE=UI-R-BS1-axw-g-10-0-UI /FEA=EST /CNT=27 /TID=Rn.19655.1 /TIER=Stack /STK=25 /UG=Rn.19655 /UG_TITLE=ESTs	BE115519	ENSRNOG00000018588
1375144_PM_at	0.00410449	1.21301	up	---	---	---	gb:BM388843 /DB_XREF=gi:18188896 /DB_XREF=UI-R-DZ0-ckn-e-20-0-UI.s1 /CLONE=UI-R-DZ0-ckn-e-20-0-UI /FEA=EST /CNT=29 /TID=Rn.843.1 /TIER=Stack /STK=21 /UG=Rn.843 /UG_TITLE=ESTs	BM388843	---
1375161_PM_at	0.0292688	1.09711	down	Mrpl55	mitochondrial ribosomal protein L55	287356	gb:BM386389 /DB_XREF=gi:18186442 /DB_XREF=UI-R-CN1-cjf-h-08-0-UI.s1 /CLONE=UI-R-CN1-cjf-h-08-0-UI /FEA=EST /CNT=30 /TID=Rn.4271.1 /TIER=Stack /STK=18 /UG=Rn.4271 /UG_TITLE=ESTs, Weakly similar to Y66H1A.3.p (Caenorhabditis elegans) (C.elegans)	BM386389	ENSRNOG00000002943
1375174_PM_at	0.0402554	1.2239	up	Dpy19l1	dpy-19-like 1 (C. elegans)	315496	gb:BI296653 /DB_XREF=gi:14961292 /DB_XREF=UI-R-CV2-cgt-g-04-0-UI.s1 /CLONE=UI-R-CV2-cgt-g-04-0-UI /FEA=EST /CNT=19 /TID=Rn.22725.1 /TIER=Stack /STK=17 /UG=Rn.22725 /UG_TITLE=ESTs	BI296653	---
1375199_PM_at	0.0261194	1.2486	up	---	---	---	gb:BG378641 /DB_XREF=gi:13303113 /DB_XREF=UI-R-CV1-bvr-h-03-0-UI.s1 /CLONE=UI-R-CV1-bvr-h-03-0-UI /FEA=EST /CNT=18 /TID=Rn.38178.1 /TIER=Stack /STK=15 /UG=Rn.38178 /UG_TITLE=ESTs	BG378641	---
1375212_PM_at	0.0419087	1.25131	up	Ankrd52	ankyrin repeat domain 52	362811	gb:AA964250 /DB_XREF=gi:4279126 /DB_XREF=UI-R-E1-gl-d-05-0-UI.s1 /CLONE=UI-R-E1-gl-d-05-0-UI /FEA=EST /CNT=16 /TID=Rn.8972.1 /TIER=Stack /STK=14 /UG=Rn.8972 /UG_TITLE=ESTs	AA964250	ENSRNOG00000030597
1375227_PM_at	0.00179692	1.16841	up	---	---	---	gb:BF416235 /DB_XREF=gi:11404224 /DB_XREF=UI-R-CA0-bkr-b-02-0-UI.s1 /CLONE=UI-R-CA0-bkr-b-02-0-UI /FEA=EST /CNT=15 /TID=Rn.63118.1 /TIER=Stack /STK=13 /UG=Rn.63118 /UG_TITLE=ESTs	BF416235	---
1375234_PM_at	0.0231831	1.27456	up	Ncoa5	nuclear receptor coactivator 5	296372	gb:AI009170 /DB_XREF=gi:4133002 /DB_XREF=EST203621 /CLONE=REMBJ87 /FEA=EST /CNT=14 /TID=Rn.8482.1 /TIER=Stack /STK=13 /UG=Rn.8482 /UG_TITLE=ESTs	AI009170	ENSRNOG00000017824
1375246_PM_at	0.0399585	1.04915	down	LOC685117///Ccdc72	coiled-coil domain containing 72 /// hypothetical protein LOC685117	679747 /// 685117	gb:BG371965 /DB_XREF=gi:13268502 /DB_XREF=UI-R-CV0-brk-e-12-0-UI.s1 /CLONE=UI-R-CV0-brk-e-12-0-UI /FEA=EST /CNT=23 /TID=Rn.4334.1 /TIER=Stack /STK=12 /UG=Rn.4334 /UG_TITLE=ESTs, Moderately similar to T13381 hypothetical protein EG:115C2.12 - fruit fly (D.melanogaster)	BG371965	---
1375248_PM_at	0.0298534	1.11784	down	Klf2	Kruppel-like factor 2 (lung)	306330	gb:BI294916 /DB_XREF=gi:14957838 /DB_XREF=UI-R-DK0-ced-f-05-0-UI.s1 /CLONE=UI-R-DK0-ced-f-05-0-UI /FEA=EST /CNT=16 /TID=Rn.81182.1 /TIER=Stack /STK=12 /UG=Rn.81182 /UG_TITLE=ESTs, Weakly similar to A39066 proline-rich protein 4 - rat (R.norvegicus)	BI294916	ENSRNOG00000014205
1375249_PM_at	0.00170901	1.21226	up	Eif2c1	eukaryotic translation initiation factor 2C, 1	313594	gb:BE109033 /DB_XREF=gi:8501138 /DB_XREF=UI-R-BS1-azc-c-01-0-UI.s1 /CLONE=UI-R-BS1-azc-c-01-0-UI /FEA=EST /CNT=15 /TID=Rn.24962.1 /TIER=Stack /STK=12 /UG=Rn.24962 /UG_TITLE=ESTs, Moderately similar to I2C2_RAT EUKARYOTIC TRANSLATION INITIATION FACTOR 2C 2 (EIF2C 2) (EIF-2C 2) (GOLGI ER PROTEIN 95 KDA) (GERP95) (R.norvegicus)	BE109033	ENSRNOG00000027320
1375253_PM_at	0.0144586	1.19016	up	Nfe2l1	nuclear factor, erythroid derived 2,-like 1	360610	gb:BF403837 /DB_XREF=gi:11391812 /DB_XREF=UI-R-CA1-bix-h-15-0-UI.s1 /CLONE=UI-R-CA1-bix-h-15-0-UI /FEA=EST /CNT=14 /TID=Rn.21931.1 /TIER=Stack /STK=12 /UG=Rn.21931 /UG_TITLE=ESTs, Weakly similar to NF-E2-related factor 2 (Rattus norvegicus) (R.norvegicus)	BF403837	ENSRNOG00000008830
1375258_PM_at	0.00810117	1.09645	down	Ascl1	Achaete-scute complex homolog 1 (Drosophila)	64186	gb:AW531857 /DB_XREF=gi:7174271 /DB_XREF=UI-R-BS0-amj-a-11-0-UI.s1 /CLONE=UI-R-BS0-amj-a-11-0-UI /FEA=EST /CNT=13 /TID=Rn.32936.2 /TIER=Stack /STK=12 /UG=Rn.32936 /LL=64186 /UG_GENE=Ascl1 /UG_TITLE=achaete-scute complex (Drosophila) homolog-like 1	AW531857	---
1375280_PM_at	0.049557	1.16674	up	Pppde1	PPPDE peptidase domain containing 1	289277	gb:AW913871 /DB_XREF=gi:8079583 /DB_XREF=EST292212 /CLONE=RGIZB56 /FEA=EST /CNT=12 /TID=Rn.9401.1 /TIER=Stack /STK=11 /UG=Rn.9401 /UG_TITLE=ESTs, Weakly similar to T29315 hypothetical protein F36D4.5 - Caenorhabditis elegans (C.elegans)	AW913871	---
1375297_PM_at	0.0085957	1.06476	down	RGD1565289	similar to RIKEN cDNA 0610008C08	363474	gb:AI168968 /DB_XREF=gi:3705276 /DB_XREF=EST214796 /CLONE=RKIBL30 /FEA=EST /CNT=23 /TID=Rn.2579.1 /TIER=Stack /STK=10 /UG=Rn.2579 /UG_TITLE=ESTs	AI168968	---
1375298_PM_at	0.0303668	1.04534	up	Ppp2r5c	protein phosphatase 2, regulatory subunit B' gamma isoform	691318	gb:BF408443 /DB_XREF=gi:11396418 /DB_XREF=UI-R-BJ2-brc-g-09-0-UI.s1 /CLONE=UI-R-BJ2-brc-g-09-0-UI /FEA=EST /CNT=29 /TID=Rn.6485.1 /TIER=Stack /STK=10 /UG=Rn.6485 /UG_TITLE=ESTs	BF408443	---
1375307_PM_at	0.031123	1.14629	up	Cbx6	chromobox homolog 6	315136	gb:BI275772 /DB_XREF=gi:14920013 /DB_XREF=UI-R-CX0-bxg-d-12-0-UI.s1 /CLONE=UI-R-CX0-bxg-d-12-0-UI /FEA=EST /CNT=16 /TID=Rn.2924.1 /TIER=Stack /STK=10 /UG=Rn.2924 /UG_TITLE=ESTs	BI275772	---
1375316_PM_at	0.0268283	1.08087	down	---	---	---	gb:BI291310 /DB_XREF=gi:14950729 /DB_XREF=UI-R-CV2-cgo-c-07-0-UI.s1 /CLONE=UI-R-CV2-cgo-c-07-0-UI /FEA=EST /CNT=10 /TID=Rn.76395.1 /TIER=Stack /STK=10 /UG=Rn.76395 /UG_TITLE=ESTs	BI291310	---
1375352_PM_at	0.0288424	1.37539	up	B4galt2	UDP-Gal:betaGlcNAc beta 1,4- galactosyltransferase, polypeptide 2	313536	gb:AI177506 /DB_XREF=gi:3728144 /DB_XREF=EST221138 /CLONE=RPLCA85 /FEA=EST /CNT=12 /TID=Rn.8447.1 /TIER=Stack /STK=9 /UG=Rn.8447 /UG_TITLE=ESTs, Highly similar to beta-1,4-galactosyltransferase II (M.musculus)	AI177506	ENSRNOG00000019609
1375369_PM_at	0.0494344	1.13582	up	RGD1305793	similar to hypothetical protein FLJ20154	309456	gb:Z83035 /DB_XREF=gi:4729166 /DB_XREF=RNZ83035 /CLONE=IRL332 /FEA=EST /CNT=11 /TID=Rn.4246.1 /TIER=Stack /STK=9 /UG=Rn.4246 /UG_TITLE=ESTs	Z83035	---
1375377_PM_at	0.0226378	1.17543	up	Igsf3	immunoglobulin superfamily, member 3	295325	gb:BE098713 /DB_XREF=gi:8490580 /DB_XREF=UI-R-BJ1-atd-a-11-0-UI.s1 /CLONE=UI-R-BJ1-atd-a-11-0-UI /FEA=EST /CNT=10 /TID=Rn.21020.1 /TIER=Stack /STK=9 /UG=Rn.21020 /UG_TITLE=ESTs	BE098713	---
1375383_PM_at	0.0299269	1.13662	down	---	---	---	gb:AW251217 /DB_XREF=gi:6594808 /DB_XREF=UI-R-BJ0-adf-e-10-0-UI.s1 /CLONE=UI-R-BJ0-adf-e-10-0-UI /FEA=EST /CNT=10 /TID=Rn.41468.1 /TIER=Stack /STK=9 /UG=Rn.41468 /UG_TITLE=ESTs	AW251217	---
1375414_PM_at	0.0164017	1.0622	down	Taf9	TAF9 RNA polymerase II, TATA box binding protein (TBP)-associated factor	373541	gb:AA944572 /DB_XREF=gi:3104488 /DB_XREF=EST200071 /CLONE=REMAL25 /FEA=EST /CNT=22 /TID=Rn.7756.1 /TIER=Stack /STK=8 /UG=Rn.7756 /UG_TITLE=ESTs, Weakly similar to JC5511 TATA-binding protein-associated factor II 31 - rat (R.norvegicus)	AA944572	ENSRNOG00000039848
1375416_PM_at	0.00838804	1.15234	down	Fam104a	family with sequence similarity 104, member A	619573	gb:AI231165 /DB_XREF=gi:3815045 /DB_XREF=EST227853 /CLONE=REMDG58 /FEA=EST /CNT=22 /TID=Rn.8644.1 /TIER=Stack /STK=8 /UG=Rn.8644 /UG_TITLE=ESTs, Moderately similar to ERC6_HUMAN EXCISION REPAIR PROTEIN ERCC-6 (H.sapiens)	AI231165	ENSRNOG00000002851
1375421_PM_a_at	0.0405523	1.19164	up	Pja2	praja 2, RING-H2 motif containing	192256	gb:AI600019 /DB_XREF=gi:4609067 /DB_XREF=EST251722 /CLONE=REMDO31 /FEA=EST /CNT=15 /TID=Rn.18446.2 /TIER=Stack /STK=8 /UG=Rn.18446 /UG_TITLE=Rattus norvegicus mRNA for neurodegeneration associated protein 1, complete cds	AI600019	---
1375423_PM_at	0.0268659	1.19284	down	LOC689959	hypothetical protein LOC689959	689959	gb:BE098181 /DB_XREF=gi:8490009 /DB_XREF=UI-R-BJ1-ata-d-05-0-UI.s1 /CLONE=UI-R-BJ1-ata-d-05-0-UI /FEA=EST /CNT=14 /TID=Rn.9433.1 /TIER=Stack /STK=8 /UG=Rn.9433 /UG_TITLE=ESTs	BE098181	ENSRNOG00000028416
1375425_PM_at	0.0184527	1.07031	down	Ift20	intraflagellar transport 20 homolog (Chlamydomonas)	287541	gb:BF395126 /DB_XREF=gi:11380052 /DB_XREF=UI-R-CM0-bji-f-07-0-UI.s1 /CLONE=UI-R-CM0-bji-f-07-0-UI /FEA=EST /CNT=17 /TID=Rn.8370.1 /TIER=Stack /STK=8 /UG=Rn.8370 /UG_TITLE=ESTs	BF395126	ENSRNOG00000008891
1375427_PM_at	0.0367708	1.16115	down	Ranbp1	RAN binding protein 1	360739	gb:AI411580 /DB_XREF=gi:4255084 /DB_XREF=EST239874 /CLONE=ROVET33 /FEA=EST /CNT=15 /TID=Rn.13052.1 /TIER=Stack /STK=8 /UG=Rn.13052 /UG_TITLE=ESTs, Highly similar to RANG MOUSE RAN-SPECIFIC GTPASE-ACTIVATING PROTEIN (M.musculus)	AI411580	---
1375447_PM_at	0.0270273	1.12956	up	Gtpbp1	GTP binding protein 1	300077	gb:BI291231 /DB_XREF=gi:14950578 /DB_XREF=UI-R-CV2-cgm-g-10-0-UI.s1 /CLONE=UI-R-CV2-cgm-g-10-0-UI /FEA=EST /CNT=10 /TID=Rn.29245.1 /TIER=Stack /STK=8 /UG=Rn.29245 /UG_TITLE=ESTs, Moderately similar to GTB1 MOUSE GTP-BINDING PROTEIN 1 (M.musculus)	BI291231	ENSRNOG00000014634
1375459_PM_at	0.00690158	1.14424	up	Srpk2	SFRS protein kinase 2	296753	gb:BE113419 /DB_XREF=gi:8505524 /DB_XREF=UI-R-BJ1-awl-b-05-0-UI.s1 /CLONE=UI-R-BJ1-awl-b-05-0-UI /FEA=EST /CNT=13 /TID=Rn.19443.1 /TIER=Stack /STK=8 /UG=Rn.19443 /UG_TITLE=ESTs, Weakly similar to CLK3 RAT PROTEIN KINASE CLK3 (R.norvegicus)	BE113419	ENSRNOG00000010601
1375460_PM_at	0.0392296	1.08889	up	Lsm12	LSM12 homolog (S. cerevisiae)	287731	gb:BE113248 /DB_XREF=gi:8505353 /DB_XREF=UI-R-BJ1-awd-c-04-0-UI.s1 /CLONE=UI-R-BJ1-awd-c-04-0-UI /FEA=EST /CNT=12 /TID=Rn.12010.1 /TIER=Stack /STK=8 /UG=Rn.12010 /UG_TITLE=ESTs, Highly similar to serine protease (H.sapiens)	BE113248	ENSRNOG00000020894
1375479_PM_at	0.00779842	1.17703	down	Magi3	Membrane associated guanylate kinase, WW and PDZ domain containing 3	245903	gb:AI555573 /DB_XREF=gi:4487936 /DB_XREF=UI-R-C2p-qs-a-05-0-UI.s1 /CLONE=UI-R-C2p-qs-a-05-0-UI /FEA=EST /CNT=9 /TID=Rn.22579.2 /TIER=Stack /STK=8 /UG=Rn.22579 /UG_TITLE=Rattus norvegicus scaffolding protein SLIPR (Slipr) mRNA, complete cds	AI555573	---
1375484_PM_at	0.0188932	1.19171	up	---	---	---	gb:BG376458 /DB_XREF=gi:13300930 /DB_XREF=UI-R-CU0-but-g-04-0-UI.s1 /CLONE=UI-R-CU0-but-g-04-0-UI /FEA=EST /CNT=9 /TID=Rn.22083.1 /TIER=Stack /STK=8 /UG=Rn.22083 /UG_TITLE=ESTs	BG376458	---
1375493_PM_at	0.0178406	1.15352	up	Vangl2	vang-like 2 (van gogh, Drosophila)	289229	gb:BE104373 /DB_XREF=gi:8496473 /DB_XREF=UI-R-BX0-aro-b-01-0-UI.s1 /CLONE=UI-R-BX0-aro-b-01-0-UI /FEA=EST /CNT=8 /TID=Rn.48383.1 /TIER=Stack /STK=8 /UG=Rn.48383 /UG_TITLE=ESTs	BE104373	ENSRNOG00000004889
1375517_PM_at	0.0266895	1.11472	up	Trp53inp2	tumor protein p53 inducible nuclear protein 2	362246	gb:AI171654 /DB_XREF=gi:3711694 /DB_XREF=EST217627 /CLONE=RMUBN88 /FEA=EST /CNT=43 /TID=Rn.3461.1 /TIER=Stack /STK=7 /UG=Rn.3461 /UG_TITLE=ESTs	AI171654	---
1375526_PM_at	0.0174411	1.1332	down	RGD1563438	similar to novel protein of unknown function (DUF423) family member	287442	gb:AI171327 /DB_XREF=gi:3711367 /DB_XREF=EST217282 /CLONE=RMUBJ17 /FEA=EST /CNT=17 /TID=Rn.6218.1 /TIER=Stack /STK=7 /UG=Rn.6218 /UG_TITLE=ESTs	AI171327	ENSRNOG00000037540
1375529_PM_at	0.0456223	1.11649	down	Cbr4	carbonyl reductase 4	359725	gb:BF404908 /DB_XREF=gi:11392883 /DB_XREF=UI-R-CA1-bij-b-05-0-UI.s1 /CLONE=UI-R-CA1-bij-b-05-0-UI /FEA=EST /CNT=15 /TID=Rn.3599.1 /TIER=Stack /STK=7 /UG=Rn.3599 /UG_TITLE=ESTs, Weakly similar to HCD2 RAT 3-HYDROXYACYL-COA DEHYDROGENASE TYPE II (R.norvegicus)	BF404908	---
1375553_PM_at	0.026134	1.10478	down	RGD1311742	similar to RIKEN cDNA 5133400G04	291676	gb:BE096042 /DB_XREF=gi:8486968 /DB_XREF=UI-R-BU0-apk-f-05-0-UI.s1 /CLONE=UI-R-BU0-apk-f-05-0-UI /FEA=EST /CNT=9 /TID=Rn.22082.1 /TIER=Stack /STK=7 /UG=Rn.22082 /UG_TITLE=ESTs	BE096042	---
1375555_PM_at	0.00977226	1.156	down	---	---	---	gb:AW251423 /DB_XREF=gi:6595014 /DB_XREF=UI-R-BJ0-adm-a-08-0-UI.s1 /CLONE=UI-R-BJ0-adm-a-08-0-UI /FEA=EST /CNT=9 /TID=Rn.15878.1 /TIER=Stack /STK=7 /UG=Rn.15878 /UG_TITLE=ESTs	AW251423	---
1375572_PM_at	0.0142655	1.17363	down	Tipin	Timeless interacting protein	363076	gb:BE100602 /DB_XREF=gi:8492498 /DB_XREF=UI-R-BJ1-auk-c-11-0-UI.s1 /CLONE=UI-R-BJ1-auk-c-11-0-UI /FEA=EST /CNT=8 /TID=Rn.6380.1 /TIER=Stack /STK=7 /UG=Rn.6380 /UG_TITLE=ESTs, Weakly similar to F23C8.9.p (Caenorhabditis elegans) (C.elegans)	BE100602	---
1375606_PM_at	0.0248502	1.15903	down	---	---	---	gb:AI235906 /DB_XREF=gi:3829412 /DB_XREF=EST232468 /CLONE=ROVCY47 /FEA=EST /CNT=7 /TID=Rn.19482.1 /TIER=Stack /STK=7 /UG=Rn.19482 /UG_TITLE=ESTs	AI235906	---
1375613_PM_at	0.0245738	1.13865	down	Gata6	GATA binding protein 6	29300	gb:AW525075 /DB_XREF=gi:7167460 /DB_XREF=UI-R-BJ0p-aim-e-08-0-UI.s1 /CLONE=UI-R-BJ0p-aim-e-08-0-UI /FEA=EST /CNT=7 /TID=Rn.8701.2 /TIER=Stack /STK=7 /UG=Rn.8701 /LL=29300 /UG_GENE=Gata6 /UG_TITLE=GATA-binding protein 6	AW525075	---
1375621_PM_at	0.0480414	1.16501	up	Sfxn5	sideroflexin 5	261737	gb:AI575254 /DB_XREF=gi:4559630 /DB_XREF=UI-R-Y0-vc-d-06-0-UI.s1 /CLONE=UI-R-Y0-vc-d-06-0-UI /FEA=EST /CNT=7 /TID=Rn.27336.1 /TIER=Stack /STK=7 /UG=Rn.27336 /UG_TITLE=ESTs	AI575254	ENSRNOG00000037871
1375630_PM_at	0.041332	1.11615	down	Nhp2l1	NHP2 non-histone chromosome protein 2-like 1 (S. cerevisiae)	300092	gb:AA859366 /DB_XREF=gi:4229714 /DB_XREF=UI-R-E0-cl-d-06-0-UI.s1 /CLONE=UI-R-E0-cl-d-06-0-UI /FEA=EST /CNT=52 /TID=Rn.1293.1 /TIER=Stack /STK=6 /UG=Rn.1293 /UG_TITLE=ESTs, Highly similar to NHPX RAT NHP2RS6 FAMILY PROTEIN YEL026W HOMOLOG (R.norvegicus)	AA859366	ENSRNOG00000006762 /// ENSRNOG00000025154
1375646_PM_at	0.0179495	1.16492	down	Efcab2	EF-hand calcium binding domain 2	289280	gb:BI299709 /DB_XREF=gi:14975989 /DB_XREF=UI-R-CV2-chw-d-03-0-UI.s1 /CLONE=UI-R-CV2-chw-d-03-0-UI /FEA=EST /CNT=14 /TID=Rn.19448.1 /TIER=Stack /STK=6 /UG=Rn.19448 /UG_TITLE=ESTs, Weakly similar to CALM_HUMAN CALMODULIN (R.norvegicus)	BI299709	---
1375648_PM_at	0.0219384	1.30442	up	RGD1307966	similar to hypothetical protein	287736	gb:BE113026 /DB_XREF=gi:8505131 /DB_XREF=UI-R-BJ1-awf-e-08-0-UI.s1 /CLONE=UI-R-BJ1-awf-e-08-0-UI /FEA=EST /CNT=13 /TID=Rn.22439.1 /TIER=Stack /STK=6 /UG=Rn.22439 /UG_TITLE=ESTs, Weakly similar to hypothetical protein (H.sapiens)	BE113026	ENSRNOG00000021041
1375653_PM_at	0.00292344	1.26272	up	---	---	---	gb:BE109405 /DB_XREF=gi:8501510 /DB_XREF=UI-R-BJ1-aur-f-10-0-UI.s1 /CLONE=UI-R-BJ1-aur-f-10-0-UI /FEA=EST /CNT=12 /TID=Rn.21687.1 /TIER=Stack /STK=6 /UG=Rn.21687 /UG_TITLE=ESTs	BE109405	---
1375654_PM_at	0.0332386	1.16776	up	Ckap4	cytoskeleton-associated protein 4	362859	gb:BI278813 /DB_XREF=gi:14926027 /DB_XREF=UI-R-CX0-bwx-c-01-0-UI.s1 /CLONE=UI-R-CX0-bwx-c-01-0-UI /FEA=EST /CNT=12 /TID=Rn.20834.1 /TIER=Stack /STK=6 /UG=Rn.20834 /UG_TITLE=ESTs, Moderately similar to S33377 P63 protein (H.sapiens)	BI278813	ENSRNOG00000008016
1375658_PM_at	0.0445122	1.11477	up	---	---	---	gb:AI412317 /DB_XREF=gi:4255821 /DB_XREF=EST240615 /CLONE=RBRDV25 /FEA=EST /CNT=11 /TID=Rn.22768.1 /TIER=Stack /STK=6 /UG=Rn.22768 /UG_TITLE=ESTs	AI412317	---
1375686_PM_at	0.00403807	1.1195	down	Ppil3	peptidylprolyl isomerase (cyclophilin)-like 3	301432	gb:AI706907 /DB_XREF=gi:4994807 /DB_XREF=UI-R-AA1-aac-g-01-0-UI.s1 /CLONE=UI-R-AA1-aac-g-01-0-UI /FEA=EST /CNT=9 /TID=Rn.14747.1 /TIER=Stack /STK=6 /UG=Rn.14747 /UG_TITLE=ESTs, Weakly similar to PEPTIDYL-PROLYL CIS-TRANS ISOMERASE A (R.norvegicus)	AI706907	---
1375711_PM_at	0.0365166	1.16174	down	---	---	---	gb:BG373688 /DB_XREF=gi:13270225 /DB_XREF=UI-R-CV1-bsg-g-06-0-UI.s1 /CLONE=UI-R-CV1-bsg-g-06-0-UI /FEA=EST /CNT=8 /TID=Rn.20542.1 /TIER=Stack /STK=6 /UG=Rn.20542 /UG_TITLE=ESTs	BG373688	---
1375713_PM_at	0.00528766	1.17783	down	Hes5	Hairy and enhancer of split 5 (Drosophila)	79225	gb:AI599432 /DB_XREF=gi:4608480 /DB_XREF=EST251135 /CLONE=RBRDY16 /FEA=EST /CNT=8 /TID=Rn.22422.2 /TIER=Stack /STK=6 /UG=Rn.22422 /LL=79225 /UG_GENE=Hes5 /UG_TITLE=hairy and enhancer of split 5 (Drosophila)	AI599432	---
1375723_PM_at	0.0159238	1.20101	up	---	---	---	gb:AI385171 /DB_XREF=gi:4197953 /DB_XREF=UI-R-E0-ci-f-01-0-UI.s1 /CLONE=UI-R-E0-ci-f-01-0-UI /FEA=EST /CNT=8 /TID=Rn.34293.1 /TIER=Stack /STK=6 /UG=Rn.34293 /UG_TITLE=ESTs	AI385171	---
1375737_PM_at	0.0406184	1.13253	down	Vamp5	Vesicle-associated membrane protein 5	89818	gb:AI385361 /DB_XREF=gi:4198143 /DB_XREF=UI-R-C2-mu-e-08-0-UI.s2 /CLONE=UI-R-C2-mu-e-08-0-UI /FEA=EST /CNT=7 /TID=Rn.22616.2 /TIER=Stack /STK=6 /UG=Rn.22616 /LL=89818 /UG_GENE=Vamp5 /UG_TITLE=vesicle-associated membrane protein 5	AI385361	---
1375738_PM_at	0.0355691	1.14179	down	Sprn	Shadow of prion protein homolog (zebrafish)	541462	gb:BF404416 /DB_XREF=gi:11392391 /DB_XREF=UI-R-CA1-bif-a-06-0-UI.s1 /CLONE=UI-R-CA1-bif-a-06-0-UI /FEA=EST /CNT=7 /TID=Rn.23342.1 /TIER=Stack /STK=6 /UG=Rn.23342 /UG_TITLE=ESTs	BF404416	---
1375745_PM_at	0.0270044	1.1458	up	---	---	---	gb:BE117491 /DB_XREF=gi:8509596 /DB_XREF=UI-R-BS1-ayo-d-12-0-UI.s1 /CLONE=UI-R-BS1-ayo-d-12-0-UI /FEA=EST /CNT=7 /TID=Rn.40367.1 /TIER=Stack /STK=6 /UG=Rn.40367 /UG_TITLE=ESTs	BE117491	---
1375764_PM_at	0.0424509	1.10977	up	Chmp2b	Chromatin modifying protein 2B	363720	gb:BE111346 /DB_XREF=gi:8503451 /DB_XREF=UI-R-BJ1-ava-g-01-0-UI.s1 /CLONE=UI-R-BJ1-ava-g-01-0-UI /FEA=EST /CNT=7 /TID=Rn.4004.2 /TIER=Stack /STK=6 /UG=Rn.4004 /UG_TITLE=ESTs, Highly similar to T12468 hypothetical protein DKFZp564O123.1 (H.sapiens)	BE111346	---
1375765_PM_at	0.0127189	1.12258	down	Hpcal4	Hippocalcin-like 4	50872	gb:BI296503 /DB_XREF=gi:14960990 /DB_XREF=UI-R-CV2-cgs-a-06-0-UI.s1 /CLONE=UI-R-CV2-cgs-a-06-0-UI /FEA=EST /CNT=8 /TID=Rn.50930.1 /TIER=Stack /STK=6 /UG=Rn.50930 /UG_TITLE=ESTs	BI296503	---
1375769_PM_at	0.00328122	1.1043	up	Trim41	tripartite motif-containing 41	303088	gb:BI283106 /DB_XREF=gi:14934522 /DB_XREF=UI-R-CU0s-cca-a-12-0-UI.s1 /CLONE=UI-R-CU0s-cca-a-12-0-UI /FEA=EST /CNT=7 /TID=Rn.42009.1 /TIER=Stack /STK=6 /UG=Rn.42009 /UG_TITLE=ESTs, Moderately similar to T46303 hypothetical protein DKFZp434N1710.1 (H.sapiens)	BI283106	ENSRNOG00000002388
1375772_PM_at	0.0211893	1.09698	down	---	---	---	gb:BI296534 /DB_XREF=gi:14961052 /DB_XREF=UI-R-CV2-cgs-d-01-0-UI.s1 /CLONE=UI-R-CV2-cgs-d-01-0-UI /FEA=EST /CNT=6 /TID=Rn.76410.1 /TIER=Stack /STK=6 /UG=Rn.76410 /UG_TITLE=ESTs	BI296534	---
1375813_PM_at	0.0221564	1.34003	up	Akap8l	A kinase (PRKA) anchor protein 8-like	299569	gb:BE102687 /DB_XREF=gi:8494786 /DB_XREF=UI-R-BT1-aqs-h-08-0-UI.s1 /CLONE=UI-R-BT1-aqs-h-08-0-UI /FEA=EST /CNT=6 /TID=Rn.49166.1 /TIER=Stack /STK=6 /UG=Rn.49166 /UG_TITLE=ESTs, Weakly similar to A53414 A-kinase anchor protein 95, AKAP95 - rat (R.norvegicus)	BE102687	ENSRNOG00000006355
1375819_PM_at	0.0319934	1.18177	down	RGD1307254	similar to RIKEN cDNA 1200011I18	298712	gb:BI299678 /DB_XREF=gi:14975958 /DB_XREF=UI-R-CV2-chw-a-05-0-UI.s1 /CLONE=UI-R-CV2-chw-a-05-0-UI /FEA=EST /CNT=6 /TID=Rn.22071.1 /TIER=Stack /STK=6 /UG=Rn.22071 /UG_TITLE=ESTs, Weakly similar to T21387 hypothetical protein F26A3.7 - Caenorhabditis elegans (C.elegans)	BI299678	ENSRNOG00000001037
1375823_PM_at	0.0319542	1.05885	up	---	---	---	gb:BF392130 /DB_XREF=gi:11376987 /DB_XREF=UI-R-CA0-bfe-e-12-0-UI.s1 /CLONE=UI-R-CA0-bfe-e-12-0-UI /FEA=EST /CNT=6 /TID=Rn.57752.1 /TIER=Stack /STK=6 /UG=Rn.57752 /UG_TITLE=ESTs	BF392130	---
1375841_PM_at	0.0288953	1.11507	down	---	---	---	gb:BI282607 /DB_XREF=gi:14933546 /DB_XREF=UI-R-CW0s-ccd-a-08-0-UI.s1 /CLONE=UI-R-CW0s-ccd-a-08-0-UI /FEA=EST /CNT=19 /TID=Rn.8153.1 /TIER=ConsEnd /STK=5 /UG=Rn.8153 /UG_TITLE=ESTs	BI282607	---
1375855_PM_at	0.000960949	1.25012	down	Epdr1	ependymin related protein 1 (zebrafish)	291180	gb:AI171799 /DB_XREF=gi:3711839 /DB_XREF=EST217781 /CLONE=RMUBQ86 /FEA=EST /CNT=13 /TID=Rn.2881.1 /TIER=ConsEnd /STK=5 /UG=Rn.2881 /UG_TITLE=ESTs	AI171799	ENSRNOG00000018989
1375863_PM_a_at	0.0435457	1.05487	down	---	---	---	gb:AI411621 /DB_XREF=gi:4255125 /DB_XREF=EST239915 /CLONE=ROVES49 /FEA=EST /CNT=14 /TID=Rn.2813.1 /TIER=ConsEnd /STK=5 /UG=Rn.2813 /UG_TITLE=ESTs	AI411621	---
1375866_PM_at	0.0461616	1.15883	up	---	---	---	gb:BF396191 /DB_XREF=gi:11381203 /DB_XREF=UI-R-BS2-bdv-g-08-0-UI.s1 /CLONE=UI-R-BS2-bdv-g-08-0-UI /FEA=EST /CNT=12 /TID=Rn.16981.1 /TIER=ConsEnd /STK=5 /UG=Rn.16981 /UG_TITLE=ESTs	BF396191	ENSRNOG00000037615
1375878_PM_at	0.033143	1.09101	up	Gapvd1	GTPase activating protein and VPS9 domains 1	311880	gb:BE102596 /DB_XREF=gi:8494695 /DB_XREF=UI-R-BT1-aqo-g-07-0-UI.s1 /CLONE=UI-R-BT1-aqo-g-07-0-UI /FEA=EST /CNT=15 /TID=Rn.22293.1 /TIER=ConsEnd /STK=5 /UG=Rn.22293 /UG_TITLE=ESTs, Highly similar to T12506 hypothetical protein DKFZp434C212.1 (H.sapiens)	BE102596	---
1375895_PM_at	0.0428641	1.11591	down	---	---	---	gb:BI275908 /DB_XREF=gi:14920306 /DB_XREF=UI-R-CX0-bxh-h-10-0-UI.s1 /CLONE=UI-R-CX0-bxh-h-10-0-UI /FEA=EST /CNT=9 /TID=Rn.42100.1 /TIER=ConsEnd /STK=5 /UG=Rn.42100 /UG_TITLE=ESTs, Weakly similar to S38061 threonine dehydratase (EC 4.2.1.16) YKL218c (similarity) - yeast (Saccharomyces cerevisiae) (S.cerevisiae)	BI275908	ENSRNOG00000002980
1375900_PM_at	0.039634	1.14294	down	Tnfrsf9	tumor necrosis factor receptor superfamily, member 9	500590	gb:AI236084 /DB_XREF=gi:3829590 /DB_XREF=EST232646 /CLONE=ROVDB21 /FEA=EST /CNT=9 /TID=Rn.22307.1 /TIER=ConsEnd /STK=5 /UG=Rn.22307 /UG_TITLE=ESTs, Moderately similar to 41BB MOUSE 4-1BB LIGAND RECEPTOR PRECURSOR (M.musculus)	AI236084	---
1375902_PM_at	0.047116	1.06596	up	---	---	---	gb:AI231065 /DB_XREF=gi:3814945 /DB_XREF=EST227753 /CLONE=REMDE81 /FEA=EST /CNT=9 /TID=Rn.24546.1 /TIER=ConsEnd /STK=5 /UG=Rn.24546 /UG_TITLE=ESTs	AI231065	---
1375906_PM_at	0.0226963	1.12579	down	LOC683034	hypothetical protein LOC683034	683034	gb:BM389920 /DB_XREF=gi:18189978 /DB_XREF=UI-R-CN1-cji-n-04-0-UI.s1 /CLONE=UI-R-CN1-cji-n-04-0-UI /FEA=EST /CNT=9 /TID=Rn.23163.1 /TIER=ConsEnd /STK=5 /UG=Rn.23163 /UG_TITLE=ESTs	BM389920	---
1375912_PM_a_at	0.0113404	1.12183	up	Galnt2	UDP-N-acetyl-alpha-D-galactosamine:polypeptide N-acetylgalactosaminyltransferase 2 (GalNAc-T2)	292090	gb:BI285430 /DB_XREF=gi:14939060 /DB_XREF=UI-R-DD0-caa-a-05-0-UI.s1 /CLONE=UI-R-DD0-caa-a-05-0-UI /FEA=EST /CNT=10 /TID=Rn.12691.1 /TIER=ConsEnd /STK=5 /UG=Rn.12691 /UG_TITLE=ESTs	BI285430	---
1375927_PM_at	0.000685286	1.16304	down	---	---	---	gb:BE100774 /DB_XREF=gi:8492672 /DB_XREF=UI-R-BJ1-auf-c-02-0-UI.s1 /CLONE=UI-R-BJ1-auf-c-02-0-UI /FEA=EST /CNT=8 /TID=Rn.12898.1 /TIER=ConsEnd /STK=5 /UG=Rn.12898 /UG_TITLE=ESTs	BE100774	---
1375956_PM_at	0.0171018	1.12553	down	Mnat1	menage a trois homolog 1, cyclin H assembly factor (Xenopus laevis)	266713	gb:AI104569 /DB_XREF=gi:3708906 /DB_XREF=EST213858 /CLONE=RHECF36 /FEA=EST /CNT=8 /TID=Rn.15168.1 /TIER=ConsEnd /STK=5 /UG=Rn.15168 /UG_TITLE=ESTs, Highly similar to CDK-ACTIVATING KINASE ASSEMBLY FACTOR MAT1 (M.musculus)	AI104569	ENSRNOG00000007267
1375976_PM_a_at	0.037338	1.14316	down	Mus81	MUS81 endonuclease homolog (S. cerevisiae)	293678	gb:AA849388 /DB_XREF=gi:2936928 /DB_XREF=EST192155 /CLONE=RMUAE20 /FEA=EST /CNT=1 /TID=Rn.1922.2 /TIER=ConsEnd /STK=1 /UG=Rn.1922 /UG_TITLE=ESTs, Weakly similar to S69670 hypothetical protein YDR386w - yeast (Saccharomyces cerevisiae) (S.cerevisiae)	AA849388	ENSRNOG00000020617
1375987_PM_at	0.0310186	1.071	up	Cerk	ceramide kinase	300129	gb:AW525194 /DB_XREF=gi:7167579 /DB_XREF=UI-R-BJ0p-aio-h-05-0-UI.s1 /CLONE=UI-R-BJ0p-aio-h-05-0-UI /FEA=EST /CNT=8 /TID=Rn.18616.1 /TIER=ConsEnd /STK=5 /UG=Rn.18616 /UG_TITLE=ESTs	AW525194	ENSRNOG00000017022
1375996_PM_at	0.00106186	1.16126	down	2001-09-01	septin 1	293507	gb:AA894262 /DB_XREF=gi:3021141 /DB_XREF=EST198065 /CLONE=RSPAU14 /FEA=EST /CNT=8 /TID=Rn.3755.1 /TIER=ConsEnd /STK=5 /UG=Rn.3755 /UG_TITLE=ESTs, Highly similar to DIFF6 PROTEIN (M.musculus)	AA894262	---
1376002_PM_at	0.00275837	1.14193	up	---	---	---	gb:AI406363 /DB_XREF=gi:4249867 /DB_XREF=EST234649 /CLONE=RBRDM80 /FEA=EST /CNT=7 /TID=Rn.3103.1 /TIER=ConsEnd /STK=5 /UG=Rn.3103 /UG_TITLE=ESTs	AI406363	---
1376025_PM_at	0.0185104	1.21667	up	Prmt2	protein arginine methyltransferase 2	499420	gb:BG670963 /DB_XREF=gi:13893062 /DB_XREF=DRNBJE04 /CLONE=DRNBJE04 /FEA=EST /CNT=7 /TID=Rn.6573.1 /TIER=ConsEnd /STK=5 /UG=Rn.6573 /UG_TITLE=ESTs, Moderately similar to ANM2_HUMAN PROTEIN ARGININE N-METHYLTRANSFERASE 2 (H.sapiens)	BG670963	ENSRNOG00000001297
1376028_PM_at	0.0098971	1.29879	up	Msl1	male-specific lethal 1 homolog (Drosophila)	303514	gb:BI285463 /DB_XREF=gi:14939126 /DB_XREF=UI-R-DD0-caa-d-10-0-UI.s1 /CLONE=UI-R-DD0-caa-d-10-0-UI /FEA=EST /CNT=7 /TID=Rn.37597.1 /TIER=ConsEnd /STK=5 /UG=Rn.37597 /UG_TITLE=ESTs	BI285463	ENSRNOG00000009643
1376035_PM_at	0.044482	1.09125	down	Ttc7b	tetratricopeptide repeat domain 7B	362768	gb:BI274308 /DB_XREF=gi:14885113 /DB_XREF=UI-R-CW0-bwh-d-07-0-UI.s1 /CLONE=UI-R-CW0-bwh-d-07-0-UI /FEA=EST /CNT=7 /TID=Rn.8129.1 /TIER=ConsEnd /STK=5 /UG=Rn.8129 /UG_TITLE=ESTs	BI274308	---
1376046_PM_at	0.0213117	1.09178	up	Hook3	Hook homolog 3 (Drosophila)	306548	gb:BF289012 /DB_XREF=gi:11220082 /DB_XREF=EST453603 /CLONE=RGIHA23 /FEA=EST /CNT=7 /TID=Rn.24923.1 /TIER=ConsEnd /STK=5 /UG=Rn.24923 /UG_TITLE=ESTs	BF289012	---
1376086_PM_at	0.0416033	1.08945	down	Ufsp2	UFM1-specific peptidase 2	361151	gb:AW528625 /DB_XREF=gi:7171039 /DB_XREF=UI-R-BO1-ajr-e-06-0-UI.s1 /CLONE=UI-R-BO1-ajr-e-06-0-UI /FEA=EST /CNT=7 /TID=Rn.14630.1 /TIER=ConsEnd /STK=5 /UG=Rn.14630 /UG_TITLE=ESTs, Weakly similar to F38A5.1.p (Caenorhabditis elegans) (C.elegans)	AW528625	ENSRNOG00000012087
1376087_PM_at	0.0241582	1.29428	up	Fam134c	family with sequence similarity 134, member C	360632	gb:BM386653 /DB_XREF=gi:18186706 /DB_XREF=UI-R-CN1-cjg-j-07-0-UI.s1 /CLONE=UI-R-CN1-cjg-j-07-0-UI /FEA=EST /CNT=7 /TID=Rn.28889.1 /TIER=ConsEnd /STK=5 /UG=Rn.28889 /UG_TITLE=ESTs	BM386653	---
1376098_PM_a_at	0.00455031	1.15588	down	Myo1g	myosin IG	289785	gb:BF282304 /DB_XREF=gi:11213475 /DB_XREF=EST446996 /CLONE=RGIDN03 /FEA=EST /CNT=7 /TID=Rn.2799.1 /TIER=ConsEnd /STK=5 /UG=Rn.2799 /UG_TITLE=ESTs	BF282304	ENSRNOG00000007113
1376110_PM_at	0.0416975	1.23692	down	Rpp25	ribonuclease P 25 subunit (human)	315705	gb:AI009623 /DB_XREF=gi:3223455 /DB_XREF=EST204074 /CLONE=RLUBG45 /FEA=EST /CNT=6 /TID=Rn.13924.1 /TIER=ConsEnd /STK=5 /UG=Rn.13924 /UG_TITLE=ESTs	AI009623	ENSRNOG00000018812
1376155_PM_at	0.031911	1.08308	down	Fam151b	family with sequence similarity 151, member B	499507	gb:BE113295 /DB_XREF=gi:8505440 /DB_XREF=UI-R-BJ1-awe-b-10-0-UI.s1 /CLONE=UI-R-BJ1-awe-b-10-0-UI /FEA=EST /CNT=6 /TID=Rn.14938.1 /TIER=ConsEnd /STK=5 /UG=Rn.14938 /UG_TITLE=ESTs, Weakly similar to T26061 hypothetical protein W01F3.1a - Caenorhabditis elegans (C.elegans)	BE113295	ENSRNOG00000024136
1376180_PM_at	0.0447498	1.0729	down	---	---	---	gb:AW915012 /DB_XREF=gi:8080696 /DB_XREF=EST346316 /CLONE=RGIBN47 /FEA=EST /CNT=6 /TID=Rn.9377.1 /TIER=ConsEnd /STK=5 /UG=Rn.9377 /UG_TITLE=ESTs	AW915012	---
1376189_PM_at	0.00120188	1.21909	down	Zmym1	zinc finger, MYM-type 1	313604	gb:AA849377 /DB_XREF=gi:2936917 /DB_XREF=EST192144 /CLONE=RMUAE06 /FEA=EST /CNT=6 /TID=Rn.19963.1 /TIER=ConsEnd /STK=5 /UG=Rn.19963 /UG_TITLE=ESTs	AA849377	ENSRNOG00000013855
1376198_PM_at	0.00442823	1.09438	up	Asam	adipocyte-specific adhesion molecule	286939	gb:BI303342 /DB_XREF=gi:14979622 /DB_XREF=UI-R-DR0-cjb-j-23-0-UI.s1 /CLONE=UI-R-DR0-cjb-j-23-0-UI /FEA=EST /CNT=6 /TID=Rn.41390.1 /TIER=ConsEnd /STK=5 /UG=Rn.41390 /UG_TITLE=ESTs	BI303342	---
1376230_PM_at	0.00731541	1.11247	down	Tmem82	transmembrane protein 82	298605	gb:BF410584 /DB_XREF=gi:11398559 /DB_XREF=UI-R-CA0-bma-d-12-0-UI.s1 /CLONE=UI-R-CA0-bma-d-12-0-UI /FEA=EST /CNT=6 /TID=Rn.52367.1 /TIER=ConsEnd /STK=5 /UG=Rn.52367 /UG_TITLE=ESTs	BF410584	---
1376231_PM_at	0.0107505	1.14836	down	Gins1	GINS complex subunit 1 (Psf1 homolog)	499914	gb:BF389244 /DB_XREF=gi:11374074 /DB_XREF=UI-R-BS2-bdi-e-07-0-UI.s1 /CLONE=UI-R-BS2-bdi-e-07-0-UI /FEA=EST /CNT=6 /TID=Rn.18312.1 /TIER=ConsEnd /STK=5 /UG=Rn.18312 /UG_TITLE=ESTs, Moderately similar to Y181_HUMAN HYPOTHETICAL PROTEIN KIAA0186 (H.sapiens)	BF389244	ENSRNOG00000008091
1376236_PM_at	0.0023543	1.15342	down	---	---	---	gb:AW534476 /DB_XREF=gi:7176890 /DB_XREF=UI-R-BS0-ans-a-07-0-UI.s1 /CLONE=UI-R-BS0-ans-a-07-0-UI /FEA=EST /CNT=6 /TID=Rn.22949.1 /TIER=ConsEnd /STK=5 /UG=Rn.22949 /UG_TITLE=ESTs, Highly similar to KIAA0383 (H.sapiens)	AW534476	---
1376269_PM_at	0.0319131	1.09373	down	Osbp2	oxysterol binding protein 2	305475	gb:BI291328 /DB_XREF=gi:14950764 /DB_XREF=UI-R-CV2-cgo-e-10-0-UI.s1 /CLONE=UI-R-CV2-cgo-e-10-0-UI /FEA=EST /CNT=6 /TID=Rn.67007.1 /TIER=ConsEnd /STK=5 /UG=Rn.67007 /UG_TITLE=ESTs, Moderately similar to T02435 probable oxysterol-binding protein DJ430N08.1 (H.sapiens)	BI291328	ENSRNOG00000019645
1376282_PM_at	0.0418504	1.08941	up	---	---	---	gb:BM392087 /DB_XREF=gi:18192140 /DB_XREF=UI-R-DO1-ckp-i-17-0-UI.s1 /CLONE=UI-R-DO1-ckp-i-17-0-UI /FEA=EST /CNT=6 /TID=Rn.46489.1 /TIER=ConsEnd /STK=5 /UG=Rn.46489 /UG_TITLE=ESTs	BM392087	---
1376292_PM_at	0.00238388	1.14007	down	---	---	---	gb:BM383423 /DB_XREF=gi:18183476 /DB_XREF=UI-R-DM1-ckb-h-08-0-UI.s1 /CLONE=UI-R-DM1-ckb-h-08-0-UI /FEA=EST /CNT=6 /TID=Rn.18142.1 /TIER=ConsEnd /STK=5 /UG=Rn.18142 /UG_TITLE=ESTs	BM383423	---
1376301_PM_at	0.0139411	1.32943	up	---	---	---	gb:BE110719 /DB_XREF=gi:8502865 /DB_XREF=UI-R-BJ1-avd-f-08-0-UI.s1 /CLONE=UI-R-BJ1-avd-f-08-0-UI /FEA=EST /CNT=6 /TID=Rn.49968.1 /TIER=ConsEnd /STK=5 /UG=Rn.49968 /UG_TITLE=ESTs	BE110719	---
1376303_PM_a_at	0.0204199	1.66954	up	Mbrl	membralin	299608	gb:BF407469 /DB_XREF=gi:11395449 /DB_XREF=UI-R-BJ2-bqs-f-10-0-UI.s1 /CLONE=UI-R-BJ2-bqs-f-10-0-UI /FEA=EST /CNT=6 /TID=Rn.44042.1 /TIER=ConsEnd /STK=5 /UG=Rn.44042 /UG_TITLE=ESTs, Weakly similar to T33571 hypothetical protein Y59C2A.2 - Caenorhabditis elegans (C.elegans)	BF407469	ENSRNOG00000012808
1376377_PM_at	0.0247507	1.16187	down	Diaph3	diaphanous homolog 3 (Drosophila)	290396	gb:BF398599 /DB_XREF=gi:11383593 /DB_XREF=UI-R-BS2-beq-f-10-0-UI.s1 /CLONE=UI-R-BS2-beq-f-10-0-UI /FEA=EST /CNT=5 /TID=Rn.9010.1 /TIER=ConsEnd /STK=5 /UG=Rn.9010 /UG_TITLE=ESTs	BF398599	---
1376423_PM_at	0.0157193	1.20967	up	Fbxl19	F-box and leucine-rich repeat protein 19	308999	gb:BG381739 /DB_XREF=gi:13306211 /DB_XREF=UI-R-CT0-bue-h-09-0-UI.s1 /CLONE=UI-R-CT0-bue-h-09-0-UI /FEA=EST /CNT=5 /TID=Rn.50190.1 /TIER=ConsEnd /STK=5 /UG=Rn.50190 /UG_TITLE=ESTs	BG381739	ENSRNOG00000018986
1376545_PM_at	0.0495036	1.09757	down	---	---	---	gb:BF394077 /DB_XREF=gi:11378941 /DB_XREF=UI-R-CA0-bgy-h-01-0-UI.s1 /CLONE=UI-R-CA0-bgy-h-01-0-UI /FEA=EST /CNT=5 /TID=Rn.62894.1 /TIER=ConsEnd /STK=5 /UG=Rn.62894 /UG_TITLE=ESTs	BF394077	---
1376550_PM_at	0.0146762	1.14533	down	---	---	---	gb:BF405084 /DB_XREF=gi:11393059 /DB_XREF=UI-R-CA1-bip-d-09-0-UI.s1 /CLONE=UI-R-CA1-bip-d-09-0-UI /FEA=EST /CNT=5 /TID=Rn.58248.1 /TIER=ConsEnd /STK=5 /UG=Rn.58248 /UG_TITLE=ESTs	BF405084	---
1376557_PM_at	0.0477995	1.09126	down	---	---	---	gb:BF393295 /DB_XREF=gi:11378155 /DB_XREF=UI-R-CA0-bft-b-09-0-UI.s1 /CLONE=UI-R-CA0-bft-b-09-0-UI /FEA=EST /CNT=5 /TID=Rn.57433.1 /TIER=ConsEnd /STK=5 /UG=Rn.57433 /UG_TITLE=ESTs	BF393295	---
1376559_PM_at	0.0134637	1.18393	down	Rpia	Ribose 5-phosphate isomerase A	362383	gb:AW253884 /DB_XREF=gi:6597475 /DB_XREF=UI-R-BJ0-aec-e-05-0-UI.s1 /CLONE=UI-R-BJ0-aec-e-05-0-UI /FEA=EST /CNT=5 /TID=Rn.41248.1 /TIER=ConsEnd /STK=5 /UG=Rn.41248 /UG_TITLE=ESTs, Highly similar to RPIA MOUSE RIBOSE 5-PHOSPHATE ISOMERASE (M.musculus)	AW253884	---
1376561_PM_at	0.00872327	1.12187	down	Fbxo16	F-box protein 16	305970	gb:AW523739 /DB_XREF=gi:7166124 /DB_XREF=UI-R-BO0-aih-e-11-0-UI.s1 /CLONE=UI-R-BO0-aih-e-11-0-UI /FEA=EST /CNT=5 /TID=Rn.11729.1 /TIER=ConsEnd /STK=5 /UG=Rn.11729 /UG_TITLE=ESTs	AW523739	ENSRNOG00000014003
1376569_PM_at	0.0422135	1.14925	up	Klf2	Kruppel-like factor 2 (lung)	306330	gb:BM385790 /DB_XREF=gi:18185843 /DB_XREF=UI-R-CN1-clx-j-08-0-UI.s1 /CLONE=UI-R-CN1-clx-j-08-0-UI /FEA=EST /CNT=30 /TID=Rn.18297.1 /TIER=ConsEnd /STK=4 /UG=Rn.18297 /UG_TITLE=ESTs, Moderately similar to CPBP RAT CORE PROMOTER ELEMENT-BINDING PROTEIN (R.norvegicus)	BM385790	ENSRNOG00000014205
1376575_PM_at	0.0339946	1.12304	up	Twsg1	twisted gastrulation homolog 1 (Drosophila)	363294	gb:BI302686 /DB_XREF=gi:14978966 /DB_XREF=UI-R-DO0-cix-j-06-0-UI.s1 /CLONE=UI-R-DO0-cix-j-06-0-UI /FEA=EST /CNT=13 /TID=Rn.8466.1 /TIER=ConsEnd /STK=4 /UG=Rn.8466 /UG_TITLE=ESTs	BI302686	---
1376585_PM_at	0.00948883	1.12933	down	Mrpl50	mitochondrial ribosomal protein L50	362517	gb:BF395602 /DB_XREF=gi:11380572 /DB_XREF=UI-R-CM0-bjo-h-12-0-UI.s1 /CLONE=UI-R-CM0-bjo-h-12-0-UI /FEA=EST /CNT=11 /TID=Rn.3638.1 /TIER=ConsEnd /STK=4 /UG=Rn.3638 /UG_TITLE=ESTs	BF395602	ENSRNOG00000007328
1376591_PM_a_at	0.0187977	1.13757	down	Tmem179b	transmembrane protein 179B	690263	gb:AA800172 /DB_XREF=gi:4131473 /DB_XREF=EST189669 /CLONE=RHEAM05 /FEA=EST /CNT=13 /TID=Rn.3354.1 /TIER=ConsEnd /STK=4 /UG=Rn.3354 /UG_TITLE=ESTs	AA800172	---
1376597_PM_at	0.00730735	1.115	down	Zcchc10	zinc finger, CCHC domain containing 10	360524	gb:AI100951 /DB_XREF=gi:3705964 /DB_XREF=EST210240 /CLONE=RBRBD35 /FEA=EST /CNT=11 /TID=Rn.13870.1 /TIER=ConsEnd /STK=4 /UG=Rn.13870 /UG_TITLE=ESTs	AI100951	ENSRNOG00000006943
1376601_PM_at	0.0162657	1.16262	up	---	---	---	gb:BF397526 /DB_XREF=gi:11382509 /DB_XREF=UI-R-BS2-bez-e-04-0-UI.s1 /CLONE=UI-R-BS2-bez-e-04-0-UI /FEA=EST /CNT=10 /TID=Rn.8192.1 /TIER=ConsEnd /STK=4 /UG=Rn.8192 /UG_TITLE=ESTs	BF397526	---
1376610_PM_a_at	0.00419229	1.20305	up	LOC304558	similar to TPR repeat-containing protein KIAA1043	304558	gb:BE109163 /DB_XREF=gi:8501268 /DB_XREF=UI-R-BS1-azb-f-07-0-UI.s1 /CLONE=UI-R-BS1-azb-f-07-0-UI /FEA=EST /CNT=10 /TID=Rn.48912.1 /TIER=ConsEnd /STK=4 /UG=Rn.48912 /UG_TITLE=ESTs, Weakly similar to G02540 nucleobindin (H.sapiens)	BE109163	---
1376614_PM_at	0.0139883	1.1007	down	---	---	---	gb:BF403180 /DB_XREF=gi:11391155 /DB_XREF=UI-R-CA0-bhs-f-01-0-UI.s1 /CLONE=UI-R-CA0-bhs-f-01-0-UI /FEA=EST /CNT=9 /TID=Rn.52324.1 /TIER=ConsEnd /STK=4 /UG=Rn.52324 /UG_TITLE=ESTs	BF403180	---
1376616_PM_at	0.0493676	1.07574	up	---	---	---	gb:BF551036 /DB_XREF=gi:11660766 /DB_XREF=UI-R-C0-hi-e-08-0-UI.r2 /CLONE=UI-R-C0-hi-e-08-0-UI /FEA=EST /CNT=9 /TID=Rn.13244.1 /TIER=ConsEnd /STK=4 /UG=Rn.13244 /UG_TITLE=ESTs	BF551036	---
1376625_PM_at	0.000295422	1.2524	down	LOC691862	hypothetical protein LOC691862	691862	gb:BI296015 /DB_XREF=gi:14960035 /DB_XREF=UI-R-DK0-cfd-d-07-0-UI.s1 /CLONE=UI-R-DK0-cfd-d-07-0-UI /FEA=EST /CNT=10 /TID=Rn.21001.1 /TIER=ConsEnd /STK=4 /UG=Rn.21001 /UG_TITLE=ESTs	BI296015	---
1376644_PM_at	0.0441799	1.20939	up	Med19	mediator complex subunit 19	311165	gb:BG380933 /DB_XREF=gi:13305447 /DB_XREF=UI-R-CT0-bul-f-08-0-UI.s1 /CLONE=UI-R-CT0-bul-f-08-0-UI /FEA=EST /CNT=8 /TID=Rn.19551.1 /TIER=ConsEnd /STK=4 /UG=Rn.19551 /UG_TITLE=ESTs, Weakly similar to T15446 hypothetical protein C07G1.4 - Caenorhabditis elegans (C.elegans)	BG380933	ENSRNOG00000006050
1376671_PM_at	0.00987747	1.09297	down	LOC681066	similar to Ferritin heavy chain (Ferritin H subunit) (Proliferation-inducing gene 15 protein)	681066	gb:BF282357 /DB_XREF=gi:11213339 /DB_XREF=EST446860 /CLONE=RGIDI58 /FEA=EST /CNT=9 /TID=Rn.12178.1 /TIER=ConsEnd /STK=4 /UG=Rn.12178 /UG_TITLE=ESTs, Weakly similar to FRIH RAT FERRITIN HEAVY CHAIN (R.norvegicus)	BF282357	ENSRNOG00000003783
1376674_PM_at	0.0284321	1.18352	up	Man2a2	Mannosidase 2, alpha 2	308757	gb:BI274940 /DB_XREF=gi:14886320 /DB_XREF=UI-R-CW0-bwe-h-02-0-UI.s1 /CLONE=UI-R-CW0-bwe-h-02-0-UI /FEA=EST /CNT=8 /TID=Rn.23979.1 /TIER=ConsEnd /STK=4 /UG=Rn.23979 /UG_TITLE=ESTs	BI274940	---
1376690_PM_at	0.00665634	1.12942	down	Med21	mediator complex subunit 21	312849	gb:BI296277 /DB_XREF=gi:14960561 /DB_XREF=UI-R-DK0-cey-d-10-0-UI.s1 /CLONE=UI-R-DK0-cey-d-10-0-UI /FEA=EST /CNT=7 /TID=Rn.6795.1 /TIER=ConsEnd /STK=4 /UG=Rn.6795 /UG_TITLE=ESTs, Highly similar to 2207342A SRB protein (H.sapiens)	BI296277	ENSRNOG00000001820
1376694_PM_at	0.030247	1.17951	up	Lmbr1l	limb region 1-like homolog (mouse)	300215	gb:BI296654 /DB_XREF=gi:14961294 /DB_XREF=UI-R-CV2-cgt-g-05-0-UI.s1 /CLONE=UI-R-CV2-cgt-g-05-0-UI /FEA=EST /CNT=7 /TID=Rn.41033.1 /TIER=ConsEnd /STK=4 /UG=Rn.41033 /UG_TITLE=ESTs, Highly similar to T46306 hypothetical protein DKFZp434D2411.1 (H.sapiens)	BI296654	ENSRNOG00000033667
1376699_PM_at	0.0308566	1.15346	up	LOC679158	similar to SRY (sex determining region Y)-box 3	679158	gb:AW919694 /DB_XREF=gi:8085493 /DB_XREF=EST350998 /CLONE=RGIGF73 /FEA=EST /CNT=7 /TID=Rn.40357.1 /TIER=ConsEnd /STK=4 /UG=Rn.40357 /UG_TITLE=ESTs	AW919694	---
1376700_PM_at	0.0436664	1.07993	up	---	---	---	gb:AI179472 /DB_XREF=gi:3730110 /DB_XREF=EST223186 /CLONE=RSPCH80 /FEA=EST /CNT=7 /TID=Rn.43951.1 /TIER=ConsEnd /STK=4 /UG=Rn.43951 /UG_TITLE=ESTs	AI179472	---
1376703_PM_at	0.00202387	1.12972	down	Nup37	nucleoporin 37	299706	gb:AI501977 /DB_XREF=gi:4399828 /DB_XREF=UI-R-C0-jc-a-02-0-UI.s1 /CLONE=UI-R-C0-jc-a-02-0-UI /FEA=EST /CNT=7 /TID=Rn.8210.1 /TIER=ConsEnd /STK=4 /UG=Rn.8210 /UG_TITLE=ESTs, Weakly similar to SC13_YEAST PROTEIN TRANSPORT PROTEIN SEC13 (S.cerevisiae)	AI501977	ENSRNOG00000004727
1376719_PM_at	0.0457953	1.0862	down	Tmem38b	transmembrane protein 38B	362521	gb:AI172189 /DB_XREF=gi:3712229 /DB_XREF=EST218184 /CLONE=RMUBW05 /FEA=EST /CNT=7 /TID=Rn.22285.1 /TIER=ConsEnd /STK=4 /UG=Rn.22285 /UG_TITLE=ESTs	AI172189	ENSRNOG00000028063
1376723_PM_a_at	0.000878502	1.13217	down	---	---	---	gb:AW142765 /DB_XREF=gi:6162664 /DB_XREF=EST293018 /CLONE=RGIAV08 /FEA=EST /CNT=7 /TID=Rn.40208.1 /TIER=ConsEnd /STK=4 /UG=Rn.40208 /UG_TITLE=ESTs	AW142765	---
1376732_PM_at	0.0243882	1.12944	down	Calr3	calreticulin 3	364529	gb:BM388733 /DB_XREF=gi:18188786 /DB_XREF=UI-R-DZ0-ckm-n-12-0-UI.s1 /CLONE=UI-R-DZ0-ckm-n-12-0-UI /FEA=EST /CNT=8 /TID=Rn.34380.1 /TIER=ConsEnd /STK=4 /UG=Rn.34380 /UG_TITLE=ESTs, Weakly similar to CALRETICULIN PRECURSOR (R.norvegicus)	BM388733	ENSRNOG00000013260
1376733_PM_at	0.0278165	1.18948	down	Igsf11	immunoglobulin superfamily, member 11	303926	gb:AI407898 /DB_XREF=gi:4251402 /DB_XREF=EST236188 /CLONE=ROVEE13 /FEA=EST /CNT=8 /TID=Rn.20210.1 /TIER=ConsEnd /STK=4 /UG=Rn.20210 /UG_TITLE=ESTs	AI407898	---
1376737_PM_at	0.0319819	1.12437	down	LOC690243	hypothetical protein LOC690243	690243	gb:BE110674 /DB_XREF=gi:8502779 /DB_XREF=UI-R-BJ1-avu-f-11-0-UI.s1 /CLONE=UI-R-BJ1-avu-f-11-0-UI /FEA=EST /CNT=8 /TID=Rn.31990.1 /TIER=ConsEnd /STK=4 /UG=Rn.31990 /UG_TITLE=ESTs	BE110674	---
1376738_PM_at	0.0286453	1.09131	down	Ttc23	tetratricopeptide repeat domain 23	308708	gb:BF284579 /DB_XREF=gi:11215649 /DB_XREF=EST449170 /CLONE=RGIES44 /FEA=EST /CNT=8 /TID=Rn.16924.1 /TIER=ConsEnd /STK=4 /UG=Rn.16924 /UG_TITLE=ESTs	BF284579	---
1376748_PM_at	0.0254423	1.13686	up	Arx	aristaless related homeobox	317268	gb:AI406684 /DB_XREF=gi:4250188 /DB_XREF=EST234971 /CLONE=ROVDV81 /FEA=EST /CNT=7 /TID=Rn.15535.1 /TIER=ConsEnd /STK=4 /UG=Rn.15535 /UG_TITLE=ESTs	AI406684	---
1376771_PM_at	0.00584677	1.15126	up	Ppm1l	protein phosphatase 1 (formerly 2C)-like	310506	gb:BF412303 /DB_XREF=gi:11400292 /DB_XREF=UI-R-BT1-bnc-a-04-0-UI.s1 /CLONE=UI-R-BT1-bnc-a-04-0-UI /FEA=EST /CNT=6 /TID=Rn.39269.1 /TIER=ConsEnd /STK=4 /UG=Rn.39269 /UG_TITLE=ESTs	BF412303	---
1376772_PM_at	0.00961823	1.1405	down	RGD1308299	Similar to chromosome 6 open reading frame 130; hypothetical 9.7 kDa protein dJ34B21.3	367214	gb:BM386583 /DB_XREF=gi:18186636 /DB_XREF=UI-R-CN1-cjg-m-02-0-UI.s1 /CLONE=UI-R-CN1-cjg-m-02-0-UI /FEA=EST /CNT=6 /TID=Rn.49667.1 /TIER=ConsEnd /STK=4 /UG=Rn.49667 /UG_TITLE=ESTs	BM386583	---
1376790_PM_at	0.0273468	1.18992	down	---	---	---	gb:AI010439 /DB_XREF=gi:4133254 /DB_XREF=EST204890 /CLONE=RLUBZ49 /FEA=EST /CNT=6 /TID=Rn.30608.1 /TIER=ConsEnd /STK=4 /UG=Rn.30608 /UG_TITLE=ESTs	AI010439	---
1376806_PM_at	0.0162277	1.08884	down	---	---	---	gb:BF403853 /DB_XREF=gi:11391828 /DB_XREF=UI-R-CA1-bix-l-03-0-UI.s1 /CLONE=UI-R-CA1-bix-l-03-0-UI /FEA=EST /CNT=6 /TID=Rn.42977.1 /TIER=ConsEnd /STK=4 /UG=Rn.42977 /UG_TITLE=ESTs	BF403853	---
1376807_PM_at	0.00544047	1.12687	down	Rabl3	RAB, member of RAS oncogene family-like 3	360720	gb:BF417476 /DB_XREF=gi:11405465 /DB_XREF=UI-R-CN0-blg-e-12-0-UI.s1 /CLONE=UI-R-CN0-blg-e-12-0-UI /FEA=EST /CNT=6 /TID=Rn.16990.1 /TIER=ConsEnd /STK=4 /UG=Rn.16990 /UG_TITLE=ESTs	BF417476	---
1376809_PM_at	0.000463953	1.21633	up	Fbrsl1	fibrosin-like 1	304572	gb:BI288660 /DB_XREF=gi:14945464 /DB_XREF=UI-R-DK0-cdd-e-01-0-UI.s1 /CLONE=UI-R-DK0-cdd-e-01-0-UI /FEA=EST /CNT=6 /TID=Rn.24267.1 /TIER=ConsEnd /STK=4 /UG=Rn.24267 /UG_TITLE=ESTs, Weakly similar to T00065 hypothetical protein KIAA0442 (H.sapiens)	BI288660	---
1376845_PM_at	0.0143674	1.34094	down	isg12(b)	putative ISG12(b) protein	299269	gb:AA819034 /DB_XREF=gi:4227699 /DB_XREF=UI-R-A0-ba-e-12-0-UI.s1 /CLONE=UI-R-A0-ba-e-12-0-UI /FEA=EST /CNT=6 /TID=Rn.16842.1 /TIER=ConsEnd /STK=4 /UG=Rn.16842 /UG_TITLE=ESTs, Weakly similar to AF154572 1 ERG2 protein (R.norvegicus)	AA819034	---
1376852_PM_at	0.00404775	1.15228	down	Mccc1	methylcrotonoyl-Coenzyme A carboxylase 1 (alpha)	294972	gb:BI274460 /DB_XREF=gi:14885394 /DB_XREF=UI-R-CW0-bwj-b-06-0-UI.s1 /CLONE=UI-R-CW0-bwj-b-06-0-UI /FEA=EST /CNT=6 /TID=Rn.15587.1 /TIER=ConsEnd /STK=4 /UG=Rn.15587 /UG_TITLE=ESTs, Weakly similar to T21641 hypothetical protein F32B6.2 - Caenorhabditis elegans (C.elegans)	BI274460	ENSRNOG00000013293
1376853_PM_at	0.0239087	1.16361	up	Rpap3	RNA polymerase II associated protein 3	300189	gb:BG380641 /DB_XREF=gi:13305113 /DB_XREF=UI-R-CT0-btz-f-10-0-UI.s1 /CLONE=UI-R-CT0-btz-f-10-0-UI /FEA=EST /CNT=6 /TID=Rn.49051.1 /TIER=ConsEnd /STK=4 /UG=Rn.49051 /UG_TITLE=ESTs	BG380641	ENSRNOG00000007065
1376854_PM_at	0.0126548	1.16283	down	---	---	---	gb:BE110028 /DB_XREF=gi:8502133 /DB_XREF=UI-R-CA0-axj-b-11-0-UI.s1 /CLONE=UI-R-CA0-axj-b-11-0-UI /FEA=EST /CNT=6 /TID=Rn.14682.1 /TIER=ConsEnd /STK=4 /UG=Rn.14682 /UG_TITLE=ESTs	BE110028	---
1376861_PM_at	0.0092748	1.10774	down	LOC686087 /// Mospd1	motile sperm domain containing 1///similar to motile sperm domain containing 1	686087///317312	gb:AW525240 /DB_XREF=gi:7167625 /DB_XREF=UI-R-BJ0p-aip-d-08-0-UI.s1 /CLONE=UI-R-BJ0p-aip-d-08-0-UI /FEA=EST /CNT=9 /TID=Rn.3309.1 /TIER=ConsEnd /STK=4 /UG=Rn.3309 /UG_TITLE=ESTs	AW525240	ENSRNOG00000008840
1376911_PM_at	0.0150629	1.20248	up	---	---	---	gb:BM386385 /DB_XREF=gi:18186438 /DB_XREF=UI-R-CN1-cjf-f-24-0-UI.s1 /CLONE=UI-R-CN1-cjf-f-24-0-UI /FEA=EST /CNT=6 /TID=Rn.45827.1 /TIER=ConsEnd /STK=4 /UG=Rn.45827 /UG_TITLE=ESTs	BM386385	---
1376912_PM_at	0.00359967	1.2143	down	RGD1310324	hypothetical LOC287388	287388	gb:BI290097 /DB_XREF=gi:14948348 /DB_XREF=UI-R-DK0-cfr-g-09-0-UI.s1 /CLONE=UI-R-DK0-cfr-g-09-0-UI /FEA=EST /CNT=6 /TID=Rn.13473.1 /TIER=ConsEnd /STK=4 /UG=Rn.13473 /UG_TITLE=ESTs	BI290097	ENSRNOG00000002970
1376913_PM_at	0.0275815	1.22222	up	---	---	---	gb:AA925375 /DB_XREF=gi:4236566 /DB_XREF=UI-R-A1-ee-d-10-0-UI.s1 /CLONE=UI-R-A1-ee-d-10-0-UI /FEA=EST /CNT=6 /TID=Rn.15510.1 /TIER=ConsEnd /STK=4 /UG=Rn.15510 /UG_TITLE=ESTs	AA925375	---
1376933_PM_at	0.0085798	1.20677	up	---	---	---	gb:AI170377 /DB_XREF=gi:3710417 /DB_XREF=EST216303 /CLONE=RLUCH55 /FEA=EST /CNT=5 /TID=Rn.23214.1 /TIER=ConsEnd /STK=4 /UG=Rn.23214 /UG_TITLE=ESTs	AI170377	---
1376950_PM_at	0.00107578	1.11826	up	Det1	de-etiolated homolog 1 (Arabidopsis)	308775	gb:BE098978 /DB_XREF=gi:8490853 /DB_XREF=UI-R-BJ1-atf-a-02-0-UI.s1 /CLONE=UI-R-BJ1-atf-a-02-0-UI /FEA=EST /CNT=5 /TID=Rn.9608.1 /TIER=ConsEnd /STK=4 /UG=Rn.9608 /UG_TITLE=ESTs	BE098978	ENSRNOG00000018515
1376963_PM_at	0.0296107	1.13139	up	Dyrk2	dual-specificity tyrosine-(Y)-phosphorylation regulated kinase 2	314862	gb:BM388710 /DB_XREF=gi:18188763 /DB_XREF=UI-R-DZ0-ckm-j-02-0-UI.s1 /CLONE=UI-R-DZ0-ckm-j-02-0-UI /FEA=EST /CNT=5 /TID=Rn.22658.1 /TIER=ConsEnd /STK=4 /UG=Rn.22658 /UG_TITLE=ESTs, Weakly similar to 2208359A protein kinase Dyrk (R.norvegicus)	BM388710	ENSRNOG00000007821
1376973_PM_at	0.0118583	1.14699	down	Sdcbp2	syndecan binding protein (syntenin) 2	311532	gb:BM386609 /DB_XREF=gi:18186662 /DB_XREF=UI-R-CN1-cjg-b-05-0-UI.s1 /CLONE=UI-R-CN1-cjg-b-05-0-UI /FEA=EST /CNT=5 /TID=Rn.15848.1 /TIER=ConsEnd /STK=4 /UG=Rn.15848 /UG_TITLE=ESTs	BM386609	ENSRNOG00000009528
1376980_PM_at	0.0204978	1.20992	up	Htr2c	5-hydroxytryptamine (serotonin) receptor 2C	25187	gb:BF285539 /DB_XREF=gi:11216519 /DB_XREF=EST450040 /CLONE=RGIFF63 /FEA=EST /CNT=5 /TID=Rn.21456.1 /TIER=ConsEnd /STK=4 /UG=Rn.21456 /UG_TITLE=ESTs	BF285539	---
1376985_PM_at	0.0200636	1.18601	down	RGD1562416	similar to RIKEN cDNA 2310007F12	317418	gb:AA866482 /DB_XREF=gi:4230008 /DB_XREF=UI-R-E0-br-h-09-0-UI.s1 /CLONE=UI-R-E0-br-h-09-0-UI /FEA=EST /CNT=5 /TID=Rn.3124.1 /TIER=ConsEnd /STK=4 /UG=Rn.3124 /UG_TITLE=ESTs, Highly similar to FGD1 MOUSE PUTATIVE RHORAC GUANINE NUCLEOTIDE EXCHANGE FACTOR (M.musculus)	AA866482	ENSRNOG00000002556
1376989_PM_at	0.00374854	1.30597	up	---	---	---	gb:BE099568 /DB_XREF=gi:8491446 /DB_XREF=UI-R-BJ1-atj-h-02-0-UI.s1 /CLONE=UI-R-BJ1-atj-h-02-0-UI /FEA=EST /CNT=5 /TID=Rn.14653.1 /TIER=ConsEnd /STK=4 /UG=Rn.14653 /UG_TITLE=ESTs	BE099568	---
1376995_PM_at	0.0128907	1.15809	down	Pgm5///Foxd4	forkhead box D4 /// phosphoglucomutase 5	679990///252886	gb:AI501186 /DB_XREF=gi:4399037 /DB_XREF=UI-R-C2p-rt-e-11-0-UI.s1 /CLONE=UI-R-C2p-rt-e-11-0-UI /FEA=EST /CNT=5 /TID=Rn.22155.1 /TIER=ConsEnd /STK=4 /UG=Rn.22155 /UG_TITLE=ESTs, Highly similar to FORKHEAD-RELATED TRANSCRIPTION FACTOR 5 (R.norvegicus)	AI501186	ENSRNOG00000015406
1377009_PM_at	0.0379297	1.09713	down	---	---	---	gb:BI274233 /DB_XREF=gi:14884964 /DB_XREF=UI-R-CW0-bwg-e-10-0-UI.s1 /CLONE=UI-R-CW0-bwg-e-10-0-UI /FEA=EST /CNT=5 /TID=Rn.64245.1 /TIER=ConsEnd /STK=4 /UG=Rn.64245 /UG_TITLE=ESTs	BI274233	---
1377021_PM_at	0.00422719	1.25128	down	Trmt6	tRNA methyltransferase 6 homolog (S. cerevisiae)	311441	gb:BI303908 /DB_XREF=gi:14980188 /DB_XREF=UI-R-DR0-cjb-j-04-0-UI.s1 /CLONE=UI-R-DR0-cjb-j-04-0-UI /FEA=EST /CNT=5 /TID=Rn.48288.1 /TIER=ConsEnd /STK=4 /UG=Rn.48288 /UG_TITLE=ESTs	BI303908	---
1377022_PM_at	0.0136292	1.10634	down	Abhd10	abhydrolase domain containing 10	303953	gb:BF395328 /DB_XREF=gi:11380293 /DB_XREF=UI-R-CM0-bjq-b-10-0-UI.s1 /CLONE=UI-R-CM0-bjq-b-10-0-UI /FEA=EST /CNT=5 /TID=Rn.12886.1 /TIER=ConsEnd /STK=4 /UG=Rn.12886 /UG_TITLE=ESTs	BF395328	ENSRNOG00000002171
1377025_PM_at	0.0420536	1.106	down	Kif3a	kinesin family member 3a	84392	gb:BF563503 /DB_XREF=gi:11673233 /DB_XREF=UI-R-C4-ale-g-02-0-UI.r1 /CLONE=UI-R-C4-ale-g-02-0-UI /FEA=EST /CNT=5 /TID=Rn.47400.1 /TIER=ConsEnd /STK=4 /UG=Rn.47400 /UG_TITLE=ESTs, Weakly similar to kinesin family member 3C (Rattus norvegicus) (R.norvegicus)	BF563503	ENSRNOG00000007515
1377039_PM_at	0.0093676	1.12911	down	---	---	---	gb:BF401480 /DB_XREF=gi:11389455 /DB_XREF=UI-R-CA0-bgl-a-12-0-UI.s1 /CLONE=UI-R-CA0-bgl-a-12-0-UI /FEA=EST /CNT=5 /TID=Rn.19277.1 /TIER=ConsEnd /STK=4 /UG=Rn.19277 /UG_TITLE=ESTs	BF401480	---
1377072_PM_at	0.0262027	1.40084	up	---	---	---	gb:BE115516 /DB_XREF=gi:8507621 /DB_XREF=UI-R-BS1-axw-g-07-0-UI.s1 /CLONE=UI-R-BS1-axw-g-07-0-UI /FEA=EST /CNT=5 /TID=Rn.48980.1 /TIER=ConsEnd /STK=4 /UG=Rn.48980 /UG_TITLE=ESTs	BE115516	---
1377081_PM_at	0.0482118	1.08774	down	Eif4a1	Eukaryotic translation initiation factor 4A1	287436	gb:BE096244 /DB_XREF=gi:8487175 /DB_XREF=UI-R-BU0-apc-g-01-0-UI.s1 /CLONE=UI-R-BU0-apc-g-01-0-UI /FEA=EST /CNT=5 /TID=Rn.41935.1 /TIER=ConsEnd /STK=4 /UG=Rn.41935 /UG_TITLE=ESTs	BE096244	---
1377121_PM_at	0.0183834	1.09323	up	Dlg5	discs, large homolog 5 (Drosophila)	305645	gb:AW520410 /DB_XREF=gi:7162788 /DB_XREF=UI-R-BJ0p-afs-b-12-0-UI.s1 /CLONE=UI-R-BJ0p-afs-b-12-0-UI /FEA=EST /CNT=5 /TID=Rn.12598.1 /TIER=ConsEnd /STK=4 /UG=Rn.12598 /UG_TITLE=ESTs	AW520410	---
1377134_PM_at	0.0305218	1.13863	up	Kdm5b	lysine (K)-specific demethylase 5B	304809	gb:AI454378 /DB_XREF=gi:4293307 /DB_XREF=UI-R-A0-bb-a-05-0-UI.s1 /CLONE=UI-R-A0-bb-a-05-0-UI /FEA=EST /CNT=5 /TID=Rn.22866.1 /TIER=ConsEnd /STK=4 /UG=Rn.22866 /UG_TITLE=ESTs, Moderately similar to I78879 retinoblastoma binding protein 2 (H.sapiens)	AI454378	ENSRNOG00000004433
1377143_PM_at	0.00802651	1.13676	up	Slc35b1	solute carrier family 35, member B1	287642	gb:BM388792 /DB_XREF=gi:18188845 /DB_XREF=UI-R-DZ0-ckn-k-09-0-UI.s1 /CLONE=UI-R-DZ0-ckn-k-09-0-UI /FEA=EST /CNT=8 /TID=Rn.12205.2 /TIER=ConsEnd /STK=4 /UG=Rn.12205 /UG_TITLE=ESTs, Highly similar to JC5026 UDP-galactose transporter related protein 1 - rat (R.norvegicus)	BM388792	ENSRNOG00000004510
1377173_PM_at	0.0253852	1.18585	up	---	---	---	gb:BE104535 /DB_XREF=gi:8496635 /DB_XREF=UI-R-BX0-arq-e-05-0-UI.s1 /CLONE=UI-R-BX0-arq-e-05-0-UI /FEA=EST /CNT=5 /TID=Rn.43539.1 /TIER=ConsEnd /STK=4 /UG=Rn.43539 /UG_TITLE=ESTs	BE104535	---
1377182_PM_at	0.00256747	1.19981	down	Itgb3bp	integrin beta 3 binding protein (beta3-endonexin)	362548	gb:BM387863 /DB_XREF=gi:18187916 /DB_XREF=UI-R-CN1-cjk-f-21-0-UI.s1 /CLONE=UI-R-CN1-cjk-f-21-0-UI /FEA=EST /CNT=5 /TID=Rn.81.1 /TIER=ConsEnd /STK=4 /UG=Rn.81 /UG_TITLE=ESTs, Weakly similar to A57277 beta-3 endonexin, long splice form (H.sapiens)	BM387863	ENSRNOG00000009116
1377185_PM_at	0.0331802	1.15476	up	RGD1562622	similar to RIKEN cDNA 6330442E10 gene	503035	gb:BG667451 /DB_XREF=gi:13889373 /DB_XREF=DRACOE08 /CLONE=DRACOE08 /FEA=EST /CNT=5 /TID=Rn.43946.1 /TIER=ConsEnd /STK=4 /UG=Rn.43946 /UG_TITLE=ESTs	BG667451	---
1377194_PM_a_at	0.0232443	1.10714	down	Ccdc90b	coiled-coil domain containing 90B	308820	gb:BE107471 /DB_XREF=gi:8499576 /DB_XREF=UI-R-BS1-ayu-b-02-0-UI.s1 /CLONE=UI-R-BS1-ayu-b-02-0-UI /FEA=EST /CNT=4 /TID=Rn.19570.1 /TIER=ConsEnd /STK=4 /UG=Rn.19570 /UG_TITLE=ESTs	BE107471	ENSRNOG00000009462
1377206_PM_at	0.0138027	1.23385	up	Lhx1	LIM homeobox 1	257634	gb:BI282093 /DB_XREF=gi:14932495 /DB_XREF=UI-R-CU0s-cbw-e-02-0-UI.s1 /CLONE=UI-R-CU0s-cbw-e-02-0-UI /FEA=EST /CNT=4 /TID=Rn.49641.1 /TIER=ConsEnd /STK=4 /UG=Rn.49641 /UG_TITLE=ESTs, Highly similar to LHX1 MOUSE LIMHOMEOBOX PROTEIN LHX1 (R.norvegicus)	BI282093	ENSRNOG00000002812
1377230_PM_at	0.00916688	1.24429	up	Tbx3	T-box 3	353305	gb:BE113656 /DB_XREF=gi:8505761 /DB_XREF=UI-R-BJ1-awg-g-11-0-UI.s1 /CLONE=UI-R-BJ1-awg-g-11-0-UI /FEA=EST /CNT=4 /TID=Rn.19492.1 /TIER=ConsEnd /STK=4 /UG=Rn.19492 /UG_TITLE=ESTs, Weakly similar to TBX2 PROTEIN (M.musculus)	BE113656	ENSRNOG00000008706
1377231_PM_at	0.019474	1.09919	down	---	---	---	gb:BF412078 /DB_XREF=gi:11400067 /DB_XREF=UI-R-BT1-bmy-d-02-0-UI.s1 /CLONE=UI-R-BT1-bmy-d-02-0-UI /FEA=EST /CNT=4 /TID=Rn.61995.1 /TIER=ConsEnd /STK=4 /UG=Rn.61995 /UG_TITLE=ESTs	BF412078	---
1377235_PM_a_at	0.00678936	1.19472	up	Ppp2r5b	protein phosphatase 2, regulatory subunit B', beta isoform	309179	gb:BI281643 /DB_XREF=gi:14931580 /DB_XREF=UI-R-CT0s-cau-g-07-0-UI.s1 /CLONE=UI-R-CT0s-cau-g-07-0-UI /FEA=EST /CNT=4 /TID=Rn.40996.1 /TIER=ConsEnd /STK=4 /UG=Rn.40996 /UG_TITLE=ESTs, Moderately similar to 2201437B phospholipase 2A:SUBUNIT=regulatory:ISOTYPE=beta (H.sapiens)	BI281643	ENSRNOG00000021025
1377252_PM_at	0.0489863	1.0611	up	RGD1306862	similar to RIKEN cDNA 1200011M11	287596	gb:BF411321 /DB_XREF=gi:11399303 /DB_XREF=UI-R-CN0-bmj-a-09-0-UI.s1 /CLONE=UI-R-CN0-bmj-a-09-0-UI /FEA=EST /CNT=4 /TID=Rn.45630.1 /TIER=ConsEnd /STK=4 /UG=Rn.45630 /UG_TITLE=ESTs	BF411321	ENSRNOG00000005769
1377267_PM_at	0.0456399	1.14299	up	Magee1	melanoma antigen, family E, 1	317232	gb:BF402385 /DB_XREF=gi:11390360 /DB_XREF=UI-R-CA0-bhn-f-03-0-UI.s1 /CLONE=UI-R-CA0-bhn-f-03-0-UI /FEA=EST /CNT=4 /TID=Rn.38053.1 /TIER=ConsEnd /STK=4 /UG=Rn.38053 /UG_TITLE=ESTs, Weakly similar to NECDIN (M.musculus)	BF402385	ENSRNOG00000002660
1377272_PM_at	0.047547	1.12108	down	---	---	---	gb:BE112934 /DB_XREF=gi:8505039 /DB_XREF=UI-R-BJ1-awa-e-08-0-UI.s1 /CLONE=UI-R-BJ1-awa-e-08-0-UI /FEA=EST /CNT=4 /TID=Rn.15399.1 /TIER=ConsEnd /STK=4 /UG=Rn.15399 /UG_TITLE=ESTs	BE112934	---
1377295_PM_at	0.00362225	1.1072	down	---	---	---	gb:BF393974 /DB_XREF=gi:11378879 /DB_XREF=UI-R-CA0-bgx-h-06-0-UI.s1 /CLONE=UI-R-CA0-bgx-h-06-0-UI /FEA=EST /CNT=4 /TID=Rn.58350.1 /TIER=ConsEnd /STK=4 /UG=Rn.58350 /UG_TITLE=ESTs	BF393974	---
1377338_PM_at	0.000600798	1.16393	down	Rad1	RAD1 homolog (S. pombe)	294800	gb:BF395193 /DB_XREF=gi:11380158 /DB_XREF=UI-R-CM0-bjj-h-12-0-UI.s1 /CLONE=UI-R-CM0-bjj-h-12-0-UI /FEA=EST /CNT=4 /TID=Rn.27018.1 /TIER=ConsEnd /STK=4 /UG=Rn.27018 /UG_TITLE=ESTs, Weakly similar to T43313 Rad1-like protein - Caenorhabditis elegans (C.elegans)	BF395193	---
1377354_PM_at	0.00953513	1.18137	down	---	---	---	gb:BI290660 /DB_XREF=gi:14949440 /DB_XREF=UI-R-DK0-cfx-h-04-0-UI.s1 /CLONE=UI-R-DK0-cfx-h-04-0-UI /FEA=EST /CNT=4 /TID=Rn.21190.1 /TIER=ConsEnd /STK=4 /UG=Rn.21190 /UG_TITLE=ESTs	BI290660	---
1377366_PM_at	0.0274069	1.10775	down	---	---	---	gb:BF389753 /DB_XREF=gi:11374589 /DB_XREF=UI-R-BS2-bdo-d-03-0-UI.s1 /CLONE=UI-R-BS2-bdo-d-03-0-UI /FEA=EST /CNT=4 /TID=Rn.15176.1 /TIER=ConsEnd /STK=4 /UG=Rn.15176 /UG_TITLE=ESTs	BF389753	---
1377375_PM_at	0.0457826	1.14161	down	Aass	aminoadipate-semialdehyde synthase	296925	gb:AA944898 /DB_XREF=gi:3104814 /DB_XREF=EST200397 /CLONE=REMAQ51 /FEA=EST /CNT=4 /TID=Rn.23007.1 /TIER=ConsEnd /STK=4 /UG=Rn.23007 /UG_TITLE=ESTs	AA944898	---
1377412_PM_at	0.0277322	1.19052	up	---	---	---	gb:AI146237 /DB_XREF=gi:3668036 /DB_XREF=UI-R-BT0-qh-c-11-0-UI.s1 /CLONE=UI-R-BT0-qh-c-11-0-UI /FEA=EST /CNT=4 /TID=Rn.22217.1 /TIER=ConsEnd /STK=4 /UG=Rn.22217 /UG_TITLE=ESTs	AI146237	---
1377414_PM_at	0.0189632	1.2141	down	RGD1307934	similar to DNA segment, Chr 19, ERATO Doi 386, expressed	293953	gb:BF400262 /DB_XREF=gi:11385273 /DB_XREF=UI-R-CA1-bjc-j-15-0-UI.s1 /CLONE=UI-R-CA1-bjc-j-15-0-UI /FEA=EST /CNT=4 /TID=Rn.45195.1 /TIER=ConsEnd /STK=4 /UG=Rn.45195 /UG_TITLE=ESTs	BF400262	---
1377415_PM_at	0.00999236	1.1584	down	---	---	---	gb:BE096334 /DB_XREF=gi:8487265 /DB_XREF=UI-R-BU0-ape-g-11-0-UI.s1 /CLONE=UI-R-BU0-ape-g-11-0-UI /FEA=EST /CNT=4 /TID=Rn.45666.1 /TIER=ConsEnd /STK=4 /UG=Rn.45666 /UG_TITLE=ESTs, Weakly similar to S64906 hypothetical protein YLR074c - yeast (Saccharomyces cerevisiae) (S.cerevisiae)	BE096334	---
1377427_PM_at	0.0161782	1.20555	up	Ptpn14	Protein tyrosine phosphatase, non-receptor type 14	305064	gb:BE104739 /DB_XREF=gi:8496839 /DB_XREF=UI-R-BX0-art-a-03-0-UI.s1 /CLONE=UI-R-BX0-art-a-03-0-UI /FEA=EST /CNT=4 /TID=Rn.74804.1 /TIER=ConsEnd /STK=4 /UG=Rn.74804 /UG_TITLE=ESTs	BE104739	---
1377429_PM_at	0.0237113	1.09075	up	Lpo	lactoperoxidase	287610	gb:BI292231 /DB_XREF=gi:14952524 /DB_XREF=UI-R-DN0-civ-a-08-0-UI.s1 /CLONE=UI-R-DN0-civ-a-08-0-UI /FEA=EST /CNT=4 /TID=Rn.60583.1 /TIER=ConsEnd /STK=4 /UG=Rn.60583 /UG_TITLE=ESTs	BI292231	---
1377453_PM_at	0.0460267	1.10529	down	RGD1309108	similar to hypothetical protein FLJ23554	315578	gb:BF408816 /DB_XREF=gi:11396791 /DB_XREF=UI-R-BT1-bne-g-03-0-UI.s1 /CLONE=UI-R-BT1-bne-g-03-0-UI /FEA=EST /CNT=4 /TID=Rn.51476.1 /TIER=ConsEnd /STK=4 /UG=Rn.51476 /UG_TITLE=ESTs	BF408816	ENSRNOG00000008138
1377461_PM_at	0.00366807	1.21233	down	LOC680485	hypothetical protein LOC680485	680485	gb:AI409983 /DB_XREF=gi:4253487 /DB_XREF=EST238276 /CLONE=RKIDX82 /FEA=EST /CNT=4 /TID=Rn.25200.1 /TIER=ConsEnd /STK=4 /UG=Rn.25200 /UG_TITLE=ESTs	AI409983	---
1377475_PM_at	0.00541181	1.19986	down	---	---	---	gb:BI296694 /DB_XREF=gi:14961377 /DB_XREF=UI-R-CV2-cgv-c-03-0-UI.s1 /CLONE=UI-R-CV2-cgv-c-03-0-UI /FEA=EST /CNT=4 /TID=Rn.20429.1 /TIER=ConsEnd /STK=4 /UG=Rn.20429 /UG_TITLE=ESTs	BI296694	---
1377503_PM_at	0.000407629	1.17004	down	Riok2	RIO kinase 2 (yeast)	308201	gb:BG371773 /DB_XREF=gi:13268310 /DB_XREF=UI-R-CV0-bri-b-01-0-UI.s1 /CLONE=UI-R-CV0-bri-b-01-0-UI /FEA=EST /CNT=4 /TID=Rn.45186.1 /TIER=ConsEnd /STK=4 /UG=Rn.45186 /UG_TITLE=ESTs, Weakly similar to S50724 hypothetical protein YNL207w - yeast (Saccharomyces cerevisiae) (S.cerevisiae)	BG371773	ENSRNOG00000012692
1377509_PM_at	0.0304433	1.10235	down	---	---	---	gb:BI295894 /DB_XREF=gi:14959797 /DB_XREF=UI-R-DK0-cfc-a-04-0-UI.s1 /CLONE=UI-R-DK0-cfc-a-04-0-UI /FEA=EST /CNT=4 /TID=Rn.63795.1 /TIER=ConsEnd /STK=4 /UG=Rn.63795 /UG_TITLE=ESTs	BI295894	---
1377517_PM_at	0.0447507	1.15283	down	---	---	---	gb:AA945491 /DB_XREF=gi:3105407 /DB_XREF=EST200990 /CLONE=RLIAO02 /FEA=EST /CNT=4 /TID=Rn.16212.1 /TIER=ConsEnd /STK=4 /UG=Rn.16212 /UG_TITLE=ESTs	AA945491	---
1377526_PM_at	0.0259606	1.26748	up	Snx27	sorting nexin family member 27	260323	gb:BE113239 /DB_XREF=gi:8505344 /DB_XREF=UI-R-BJ1-awd-b-07-0-UI.s1 /CLONE=UI-R-BJ1-awd-b-07-0-UI /FEA=EST /CNT=4 /TID=Rn.53851.1 /TIER=ConsEnd /STK=4 /UG=Rn.53851 /UG_TITLE=ESTs	BE113239	ENSRNOG00000020893
1377532_PM_at	0.0355695	1.1184	up	RGD1305020	similar to Hepatocellular carcinoma-associated antigen 58 homolog	311575	gb:AW434782 /DB_XREF=gi:6966129 /DB_XREF=UI-R-BJ0p-agf-e-06-0-UI.s1 /CLONE=UI-R-BJ0p-agf-e-06-0-UI /FEA=EST /CNT=4 /TID=Rn.27399.1 /TIER=ConsEnd /STK=4 /UG=Rn.27399 /UG_TITLE=ESTs	AW434782	ENSRNOG00000019948
1377537_PM_at	0.0353599	1.09774	down	RGD1559980	RGD1559980	499158	gb:BE121268 /DB_XREF=gi:8513373 /DB_XREF=UI-R-CA0-bas-h-11-0-UI.s1 /CLONE=UI-R-CA0-bas-h-11-0-UI /FEA=EST /CNT=4 /TID=Rn.52198.1 /TIER=ConsEnd /STK=4 /UG=Rn.52198 /UG_TITLE=ESTs	BE121268	---
1377583_PM_at	0.0189816	1.15216	down	---	---	---	gb:BE115671 /DB_XREF=gi:8507776 /DB_XREF=UI-R-BJ1-avy-f-01-0-UI.s1 /CLONE=UI-R-BJ1-avy-f-01-0-UI /FEA=EST /CNT=4 /TID=Rn.22694.1 /TIER=ConsEnd /STK=4 /UG=Rn.22694 /UG_TITLE=ESTs, Highly similar to AKA2_HUMAN A KINASE ANCHOR PROTEIN 2 (PROTEIN KINASE A ANCHORING PROTEIN 2) (PRKA2) (H.sapiens)	BE115671	---
1377593_PM_at	0.00222509	1.08154	down	Dpm1	dolichyl-phosphate mannosyltransferase polypeptide 1, catalytic subunit	296394	gb:BI284172 /DB_XREF=gi:14936610 /DB_XREF=UI-R-CX0s-ccn-a-08-0-UI.s1 /CLONE=UI-R-CX0s-ccn-a-08-0-UI /FEA=EST /CNT=28 /TID=Rn.7840.1 /TIER=ConsEnd /STK=3 /UG=Rn.7840 /UG_TITLE=ESTs, Weakly similar to T51776 dolichyl-phosphate beta-glucosyltransferase (H.sapiens)	BI284172	ENSRNOG00000010993
1377616_PM_at	0.0149867	1.11892	down	Fam92a1	family with sequence similarity 92, member A1	297903	gb:BE114214 /DB_XREF=gi:8506319 /DB_XREF=UI-R-CA0-axo-d-09-0-UI.s1 /CLONE=UI-R-CA0-axo-d-09-0-UI /FEA=EST /CNT=10 /TID=Rn.18092.1 /TIER=ConsEnd /STK=3 /UG=Rn.18092 /UG_TITLE=ESTs	BE114214	ENSRNOG00000016338
1377617_PM_at	0.0433179	1.117	up	Pura	purine rich element binding protein A	307498	gb:BF550438 /DB_XREF=gi:11660168 /DB_XREF=UI-R-A1-eh-h-12-0-UI.r1 /CLONE=UI-R-A1-eh-h-12-0-UI /FEA=EST /CNT=10 /TID=Rn.15482.1 /TIER=ConsEnd /STK=3 /UG=Rn.15482 /UG_TITLE=ESTs	BF550438	---
1377731_PM_at	0.00897237	1.10307	down	C1d	nuclear DNA binding protein	289810	gb:AI454091 /DB_XREF=gi:4291300 /DB_XREF=UI-R-A0-ah-f-02-0-UI.s1 /CLONE=UI-R-A0-ah-f-02-0-UI /FEA=EST /CNT=10 /TID=Rn.14725.1 /TIER=ConsEnd /STK=3 /UG=Rn.14725 /UG_TITLE=ESTs	AI454091	ENSRNOG00000005982
1377858_PM_at	0.0146774	1.14891	down	Prdm2	PR domain containing 2, with ZNF domain	313678	gb:BE120443 /DB_XREF=gi:8512548 /DB_XREF=UI-R-CA0-bam-e-03-0-UI.s1 /CLONE=UI-R-CA0-bam-e-03-0-UI /FEA=EST /CNT=5 /TID=Rn.64942.1 /TIER=ConsEnd /STK=3 /UG=Rn.64942 /UG_TITLE=ESTs, Moderately similar to I38902 retinoblastoma binding protein RIZ (H.sapiens)	BE120443	ENSRNOG00000033522
1377923_PM_at	0.0226351	1.15988	down	Stard8	StAR-related lipid transfer (START) domain containing 8	312113	gb:AA892818 /DB_XREF=gi:3019697 /DB_XREF=EST196621 /CLONE=RKIAX63 /FEA=EST /CNT=5 /TID=Rn.14795.1 /TIER=ConsEnd /STK=3 /UG=Rn.14795 /UG_TITLE=ESTs	AA892818	---
1377924_PM_at	0.0206833	1.21268	down	---	---	---	gb:BE113414 /DB_XREF=gi:8505519 /DB_XREF=UI-R-BJ1-awl-a-10-0-UI.s1 /CLONE=UI-R-BJ1-awl-a-10-0-UI /FEA=EST /CNT=5 /TID=Rn.3309.2 /TIER=ConsEnd /STK=3 /UG=Rn.3309 /UG_TITLE=ESTs	BE113414	---
1378340_PM_at	0.0259484	1.20423	down	---	---	---	gb:AI639305 /DB_XREF=gi:4700339 /DB_XREF=rx00657s /CLONE=rx00657 /FEA=EST /CNT=4 /TID=Rn.20632.1 /TIER=ConsEnd /STK=3 /UG=Rn.20632 /UG_TITLE=ESTs	AI639305	ENSRNOG00000022641
1378404_PM_at	0.0384716	1.13244	down	---	---	---	gb:AW435040 /DB_XREF=gi:6966347 /DB_XREF=UI-R-BJ0p-afv-h-08-0-UI.s1 /CLONE=UI-R-BJ0p-afv-h-08-0-UI /FEA=EST /CNT=4 /TID=Rn.42455.1 /TIER=ConsEnd /STK=3 /UG=Rn.42455 /UG_TITLE=ESTs, Weakly similar to S12207 hypothetical protein (M.musculus)	AW435040	---
1379031_PM_at	0.00640322	1.36378	down	Gca	grancalcin	295647	gb:BM390697 /DB_XREF=gi:18190750 /DB_XREF=UI-R-CN1-cjr-o-22-0-UI.s1 /CLONE=UI-R-CN1-cjr-o-22-0-UI /FEA=EST /CNT=3 /TID=Rn.21437.2 /TIER=ConsEnd /STK=3 /UG=Rn.21437 /UG_TITLE=ESTs	BM390697	---
1379045_PM_at	0.0330773	1.09976	up	---	---	---	gb:AI639215 /DB_XREF=gi:4700249 /DB_XREF=rx01040s /CLONE=rx01040 /FEA=EST /CNT=3 /TID=Rn.49043.1 /TIER=ConsEnd /STK=3 /UG=Rn.49043 /UG_TITLE=ESTs	AI639215	---
1379243_PM_at	0.047752	1.08545	down	Ndufa6	NADH dehydrogenase (ubiquinone) 1 alpha subcomplex, 6 (B14)	315167	gb:AA819547 /DB_XREF=gi:4228683 /DB_XREF=UI-R-A0-bf-g-10-0-UI.s1 /CLONE=UI-R-A0-bf-g-10-0-UI /FEA=EST /CNT=16 /TID=Rn.4013.1 /TIER=ConsEnd /STK=2 /UG=Rn.4013 /UG_TITLE=ESTs, Moderately similar to JC5821 NADH dehydrogenase (H.sapiens)	AA819547	ENSRNOG00000008569
1379357_PM_at	0.0318228	1.1052	down	---	---	---	gb:AI408767 /DB_XREF=gi:4252271 /DB_XREF=EST237058 /CLONE=ROVEH02 /FEA=EST /CNT=7 /TID=Rn.21441.1 /TIER=ConsEnd /STK=2 /UG=Rn.21441 /UG_TITLE=ESTs, Weakly similar to POL1_HUMAN RETROVIRUS-RELATED POL POLYPROTEIN (H.sapiens)	AI408767	---
1379443_PM_at	0.0175328	1.18416	down	Hps3	Hermansky-Pudlak syndrome 3 homolog (human)	310288	gb:BE120719 /DB_XREF=gi:8512824 /DB_XREF=UI-R-CA0-bay-g-04-0-UI.s1 /CLONE=UI-R-CA0-bay-g-04-0-UI /FEA=EST /CNT=6 /TID=Rn.43920.1 /TIER=ConsEnd /STK=2 /UG=Rn.43920 /UG_TITLE=ESTs	BE120719	---
1379456_PM_at	0.0386705	1.07188	up	Mcart1	mitochondrial carrier triple repeat 1	313241	gb:AA957383 /DB_XREF=gi:4277273 /DB_XREF=UI-R-E1-fu-a-10-0-UI.s1 /CLONE=UI-R-E1-fu-a-10-0-UI /FEA=EST /CNT=6 /TID=Rn.9269.1 /TIER=ConsEnd /STK=2 /UG=Rn.9269 /UG_TITLE=ESTs	AA957383	ENSRNOG00000039278
1379479_PM_at	0.0175822	1.13469	down	Kif4	kinesin family member 4	84393	gb:AA859926 /DB_XREF=gi:4230462 /DB_XREF=UI-R-E0-cg-c-08-0-UI.s1 /CLONE=UI-R-E0-cg-c-08-0-UI /FEA=EST /CNT=5 /TID=Rn.22652.1 /TIER=ConsEnd /STK=2 /UG=Rn.22652 /UG_TITLE=ESTs	AA859926	ENSRNOG00000038035
1379623_PM_at	0.0270259	1.11729	down	RGD1309482	similar to chromosome 10 open reading frame 4; similar to putative acid phosphatase F26C11.1	365458	gb:AA874896 /DB_XREF=gi:4230778 /DB_XREF=UI-R-E0-ck-e-04-0-UI.s1 /CLONE=UI-R-E0-ck-e-04-0-UI /FEA=EST /CNT=4 /TID=Rn.3166.1 /TIER=ConsEnd /STK=2 /UG=Rn.3166 /UG_TITLE=ESTs, Weakly similar to acid phosphatase (Caenorhabditis elegans) (C.elegans)	AA874896	ENSRNOG00000015235
1379783_PM_at	0.0042109	1.15326	down	LOC686432	hypothetical protein LOC686432	686432	gb:AI113136 /DB_XREF=gi:3513085 /DB_XREF=UI-R-C2p-nr-h-01-0-UI.s1 /CLONE=UI-R-C2p-nr-h-01-0-UI /FEA=EST /CNT=1 /TID=Rn.42824.2 /TIER=ConsEnd /STK=1 /UG=Rn.42824 /UG_TITLE=ESTs	AI113136	---
1379853_PM_at	0.0355806	1.07927	down	Hspb11	heat shock protein family B (small), member 11	685284	gb:AI058985 /DB_XREF=gi:3332762 /DB_XREF=UI-R-C1-lq-b-06-0-UI.s1 /CLONE=UI-R-C1-lq-b-06-0-UI /FEA=EST /CNT=4 /TID=Rn.37665.1 /TIER=ConsEnd /STK=2 /UG=Rn.37665 /UG_TITLE=ESTs	AI058985	---
1379863_PM_at	0.0233496	1.21198	up	Kcnd2	potassium voltage gated channel, Shal-related family, member 2	65180	gb:AW528891 /DB_XREF=gi:7171305 /DB_XREF=UI-R-BT1-akj-g-08-0-UI.s1 /CLONE=UI-R-BT1-akj-g-08-0-UI /FEA=EST /CNT=4 /TID=Rn.46645.1 /TIER=ConsEnd /STK=2 /UG=Rn.46645 /UG_TITLE=ESTs	AW528891	---
1380599_PM_at	0.010346	1.23057	down	---	---	---	gb:AI639258 /DB_XREF=gi:4700292 /DB_XREF=rx01619s /CLONE=rx01619 /FEA=EST /CNT=3 /TID=Rn.34807.1 /TIER=ConsEnd /STK=2 /UG=Rn.34807 /UG_TITLE=ESTs	AI639258	---
1381341_PM_at	0.00405327	1.23292	down	rCG_43687	hypothetical protein LOC688459	688459	gb:BE111796 /DB_XREF=gi:8503901 /DB_XREF=UI-R-BJ1-avx-h-07-0-UI.s1 /CLONE=UI-R-BJ1-avx-h-07-0-UI /FEA=EST /CNT=2 /TID=Rn.43698.1 /TIER=ConsEnd /STK=2 /UG=Rn.43698 /UG_TITLE=ESTs	BE111796	---
1381504_PM_at	0.0297878	1.08078	down	Aspn	asporin	306805	gb:AI639412 /DB_XREF=gi:4700446 /DB_XREF=rx04434s /CLONE=rx04434 /FEA=EST /CNT=2 /TID=Rn.43324.1 /TIER=ConsEnd /STK=2 /UG=Rn.43324 /UG_TITLE=ESTs, Weakly similar to PGS1 RAT BONECARTILAGE PROTEOGLYCAN I PRECURSOR (R.norvegicus)	AI639412	ENSRNOG00000015410
1381564_PM_at	0.00896645	1.14616	down	Glmn	glomulin, FKBP associated protein	289437	gb:AI763657 /DB_XREF=gi:5209592 /DB_XREF=UI-R-Y0-acj-e-10-0-UI.s1 /CLONE=UI-R-Y0-acj-e-10-0-UI /FEA=EST /CNT=4 /TID=Rn.16863.1 /TIER=ConsEnd /STK=0 /UG=Rn.16863 /UG_TITLE=ESTs	AI763657	ENSRNOG00000002054
1382049_PM_at	0.0104811	1.13483	down	Tmem216	transmembrane protein 216	361727	gb:AW530828 /DB_XREF=gi:7173242 /DB_XREF=UI-R-C4-alb-h-10-0-UI.s1 /CLONE=UI-R-C4-alb-h-10-0-UI /FEA=EST /CNT=11 /TID=Rn.854.1 /TIER=ConsEnd /STK=1 /UG=Rn.854 /UG_TITLE=ESTs, Weakly similar to T15710 hypothetical protein C30B5.6 - Caenorhabditis elegans (C.elegans)	AW530828	ENSRNOG00000020692
1382464_PM_at	0.0448175	1.1126	down	RGD1309779	similar to ENSANGP00000021391	363074	gb:BF547020 /DB_XREF=gi:11638127 /DB_XREF=UI-R-C1-ku-c-10-0-UI.r1 /CLONE=UI-R-C1-ku-c-10-0-UI /FEA=EST /CNT=4 /TID=Rn.29863.1 /TIER=ConsEnd /STK=1 /UG=Rn.29863 /UG_TITLE=ESTs	BF547020	ENSRNOG00000008340
1382503_PM_at	0.0224695	1.08761	down	Irf2	interferon regulatory factor 2	290749	gb:BE109551 /DB_XREF=gi:8501656 /DB_XREF=UI-R-BJ1-avp-e-02-0-UI.s1 /CLONE=UI-R-BJ1-avp-e-02-0-UI /FEA=EST /CNT=4 /TID=Rn.23885.1 /TIER=ConsEnd /STK=1 /UG=Rn.23885 /UG_TITLE=ESTs, Highly similar to IRF2 MOUSE INTERFERON REGULATORY FACTOR 2 (M.musculus)	BE109551	ENSRNOG00000009824
1382632_PM_at	0.0189382	1.17574	up	Robo2	roundabout, axon guidance receptor, homolog 2 (Drosophila)	84409	gb:AI069991 /DB_XREF=gi:3396242 /DB_XREF=UI-R-C1-lp-c-06-0-UI.s1 /CLONE=UI-R-C1-lp-c-06-0-UI /FEA=EST /CNT=3 /TID=Rn.33450.1 /TIER=ConsEnd /STK=1 /UG=Rn.33450 /UG_TITLE=ESTs	AI069991	ENSRNOG00000029598
1382690_PM_at	0.0150979	1.09171	up	Cgm4	carcinoembryonic antigen gene family 4	24257	gb:AI070180 /DB_XREF=gi:3396431 /DB_XREF=UI-R-C1-lp-e-12-0-UI.s1 /CLONE=UI-R-C1-lp-e-12-0-UI /FEA=EST /CNT=3 /TID=Rn.21265.1 /TIER=ConsEnd /STK=1 /UG=Rn.21265 /UG_TITLE=ESTs, Weakly similar to A35364 carcinoembryonic antigen-related protein (R.norvegicus)	AI070180	ENSRNOG00000034055
1382739_PM_at	0.0448834	1.06311	down	Gpr19	G protein-coupled receptor 19	312787	gb:AI045718 /DB_XREF=gi:3292537 /DB_XREF=UI-R-C1-jy-c-09-0-UI.s2 /CLONE=UI-R-C1-jy-c-09-0-UI /FEA=EST /CNT=3 /TID=Rn.20912.1 /TIER=ConsEnd /STK=1 /UG=Rn.20912 /UG_TITLE=ESTs, Highly similar to GPRJ RAT PROBABLE G PROTEIN-COUPLED RECEPTOR GPR19 (R.norvegicus)	AI045718	ENSRNOG00000007126
1382920_PM_at	0.033847	1.37726	up	Lrrc8a	leucine rich repeat containing 8 family, member A	311846	gb:AA875002 /DB_XREF=gi:4230884 /DB_XREF=UI-R-E0-cb-a-11-0-UI.s1 /CLONE=UI-R-E0-cb-a-11-0-UI /FEA=EST /CNT=2 /TID=Rn.23981.1 /TIER=ConsEnd /STK=1 /UG=Rn.23981 /UG_TITLE=ESTs	AA875002	ENSRNOG00000025296
1383075_PM_at	0.0194913	1.15778	up	Ccnd1	cyclin D1	58919	gb:BI295861 /DB_XREF=gi:14959731 /DB_XREF=UI-R-DK0-cfb-e-07-0-UI.s1 /CLONE=UI-R-DK0-cfb-e-07-0-UI /FEA=EST /CNT=12 /TID=Rn.43723.1 /TIER=ConsEnd /STK=0 /UG=Rn.43723 /UG_TITLE=ESTs	BI295861	---
1383100_PM_at	0.0168244	1.13181	down	Fam18b2	family with sequence similarity 18, member B2	687358	gb:AI070897 /DB_XREF=gi:3397148 /DB_XREF=UI-R-C2-mt-a-06-0-UI.s1 /CLONE=UI-R-C2-mt-a-06-0-UI /FEA=EST /CNT=12 /TID=Rn.30869.1 /TIER=ConsEnd /STK=0 /UG=Rn.30869 /UG_TITLE=ESTs	AI070897	---
1383106_PM_at	0.00282301	1.18486	down	Cul2	cullin 2	361258	gb:BI295890 /DB_XREF=gi:14959789 /DB_XREF=UI-R-DK0-cfb-h-12-0-UI.s1 /CLONE=UI-R-DK0-cfb-h-12-0-UI /FEA=EST /CNT=10 /TID=Rn.2970.1 /TIER=ConsEnd /STK=0 /UG=Rn.2970 /UG_TITLE=ESTs, Highly similar to CUL2_HUMAN CULLIN HOMOLOG 2 (H.sapiens)	BI295890	ENSRNOG00000015292
1383141_PM_a_at	0.0490494	1.09448	up	Cpsf7	cleavage and polyadenylation specific factor 7, 59kDa	365407	gb:AI236700 /DB_XREF=gi:3830206 /DB_XREF=EST233262 /CLONE=ROVDJ48 /FEA=EST /CNT=1 /TID=Rn.24460.2 /TIER=ConsEnd /STK=1 /UG=Rn.24460 /UG_TITLE=ESTs, Weakly similar to S57447 HPBRII-7 protein (H.sapiens)	AI236700	ENSRNOG00000020668
1383175_PM_a_at	0.0014917	1.13679	down	RGD1306959	similar to C11orf17 protein	361624	gb:BF561368 /DB_XREF=gi:11671098 /DB_XREF=UI-R-C0-hq-d-08-0-UI.r1 /CLONE=UI-R-C0-hq-d-08-0-UI /FEA=EST /CNT=10 /TID=Rn.40386.2 /TIER=ConsEnd /STK=0 /UG=Rn.40386 /UG_TITLE=ESTs	BF561368	ENSRNOG00000013744
1383251_PM_at	0.0432362	1.07603	down	Parp2	poly (ADP-ribose) polymerase 2	290027	gb:AW524533 /DB_XREF=gi:7166918 /DB_XREF=UI-R-BO0-ahz-e-09-0-UI.s1 /CLONE=UI-R-BO0-ahz-e-09-0-UI /FEA=EST /CNT=7 /TID=Rn.22730.1 /TIER=ConsEnd /STK=0 /UG=Rn.22730 /UG_TITLE=ESTs, Weakly similar to I52331 NAD+ ADP-ribosyltransferase (R.norvegicus)	AW524533	ENSRNOG00000008892
1383331_PM_at	0.0425807	1.2635	up	---	---	---	gb:BF548234 /DB_XREF=gi:11639341 /DB_XREF=UI-R-A0-aa-d-06-0-UI.r1 /CLONE=UI-R-A0-aa-d-06-0-UI /FEA=EST /CNT=6 /TID=Rn.8380.1 /TIER=ConsEnd /STK=0 /UG=Rn.8380 /UG_TITLE=ESTs	BF548234	---
1383621_PM_at	0.0166067	1.14902	down	---	---	---	gb:AW526365 /DB_XREF=gi:7168750 /DB_XREF=UI-R-BO1-ajb-c-09-0-UI.s1 /CLONE=UI-R-BO1-ajb-c-09-0-UI /FEA=EST /CNT=5 /TID=Rn.28914.1 /TIER=ConsEnd /STK=0 /UG=Rn.28914 /UG_TITLE=ESTs	AW526365	---
1383660_PM_at	0.00683448	1.1934	down	---	---	---	gb:AI713166 /DB_XREF=gi:5016966 /DB_XREF=UI-R-Y0-aaz-a-06-0-UI.s1 /CLONE=UI-R-Y0-aaz-a-06-0-UI /FEA=EST /CNT=5 /TID=Rn.14604.1 /TIER=ConsEnd /STK=0 /UG=Rn.14604 /UG_TITLE=ESTs	AI713166	---
1383670_PM_at	0.0159383	1.11182	down	Zfp426	zinc finger protein 426	690895	gb:BM383134 /DB_XREF=gi:18183187 /DB_XREF=UI-R-DS0-cje-f-12-0-UI.s1 /CLONE=UI-R-DS0-cje-f-12-0-UI /FEA=EST /CNT=5 /TID=Rn.14863.1 /TIER=ConsEnd /STK=0 /UG=Rn.14863 /UG_TITLE=ESTs	BM383134	---
1383671_PM_at	0.0136666	1.23335	up	Adam9	ADAM metallopeptidase domain 9 (meltrin gamma)	290834	gb:AI071724 /DB_XREF=gi:3397939 /DB_XREF=UI-R-C2-nc-g-10-0-UI.s1 /CLONE=UI-R-C2-nc-g-10-0-UI /FEA=EST /CNT=5 /TID=Rn.25221.1 /TIER=ConsEnd /STK=0 /UG=Rn.25221 /LL=57024 /UG_GENE=Adam9 /UG_TITLE=a disintegrin and metalloproteinase domain 9 (meltrin gamma)	AI071724	ENSRNOG00000017231
1383822_PM_at	0.037477	1.08563	up	Bicd2	bicaudal D homolog 2 (Drosophila)	306809	gb:AI029990 /DB_XREF=gi:3247816 /DB_XREF=UI-R-C0-jr-f-11-0-UI.s1 /CLONE=UI-R-C0-jr-f-11-0-UI /FEA=EST /CNT=4 /TID=Rn.17091.1 /TIER=ConsEnd /STK=0 /UG=Rn.17091 /UG_TITLE=ESTs	AI029990	ENSRNOG00000016031
1384019_PM_a_at	0.0437089	1.08075	up	---	---	---	gb:BM383449 /DB_XREF=gi:18183502 /DB_XREF=UI-R-DM1-ckb-l-22-0-UI.s1 /CLONE=UI-R-DM1-ckb-l-22-0-UI /FEA=EST /CNT=4 /TID=Rn.2981.1 /TIER=ConsEnd /STK=0 /UG=Rn.2981 /UG_TITLE=ESTs	BM383449	---
1384234_PM_at	0.0191662	1.18006	up	Prrx1	paired related homeobox 1	266813	gb:BE126475 /DB_XREF=gi:8549157 /DB_XREF=DEPA0223 /FEA=EST /CNT=3 /TID=Rn.45994.1 /TIER=ConsEnd /STK=0 /UG=Rn.45994 /UG_TITLE=ESTs, Highly similar to PMX1 MOUSE PAIRED MESODERM HOMEOBOX PROTEIN 1 (R.norvegicus)	BE126475	ENSRNOG00000003720
1384356_PM_at	0.00541883	1.20358	down	Fam151b	family with sequence similarity 151, member B	499507	gb:AW141967 /DB_XREF=gi:6161826 /DB_XREF=EST292082 /CLONE=RGICQ56 /FEA=EST /CNT=2 /TID=Rn.14938.2 /TIER=ConsEnd /STK=0 /UG=Rn.14938 /UG_TITLE=ESTs, Weakly similar to T26061 hypothetical protein W01F3.1a - Caenorhabditis elegans (C.elegans)	AW141967	ENSRNOG00000024136
1384548_PM_at	0.036503	1.04396	down	Rpl32	ribosomal protein L32	28298	gb:BM388159 /DB_XREF=gi:18188212 /DB_XREF=UI-R-DM1-cjz-c-23-0-UI.s1 /CLONE=UI-R-DM1-cjz-c-23-0-UI /FEA=EST /CNT=2 /TID=Rn.81487.1 /TIER=ConsEnd /STK=0 /UG=Rn.81487 /UG_TITLE=ESTs	BM388159	ENSRNOG00000032605///ENSRNOG00000026921
1384586_PM_x_at	0.0428585	1.0974	down	LOC690418	similar to Acidic proline-rich protein PRP25 precursor	690418	gb:BI279337 /DB_XREF=gi:14927056 /DB_XREF=UI-R-DA0-byn-b-09-0-UI.s1 /CLONE=UI-R-DA0-byn-b-09-0-UI /FEA=EST /CNT=3 /TID=Rn.77923.1 /TIER=ConsEnd /STK=3 /UG=Rn.77923 /UG_TITLE=ESTs, Moderately similar to A42817 proline-rich protein precursor - rat (R.norvegicus)	BI279337	---
1384989_PM_at	0.00444188	1.15923	down	RGD1311019	similar to hypothetical protein DKFZp434H2010	298694	gb:BE107398 /DB_XREF=gi:8499503 /DB_XREF=UI-R-BS1-ayt-c-05-0-UI.s1 /CLONE=UI-R-BS1-ayt-c-05-0-UI /FEA=EST /CNT=1 /TID=Rn.51170.2 /TIER=ConsEnd /STK=1 /UG=Rn.51170 /UG_TITLE=ESTs	BE107398	ENSRNOG00000020295
1385065_PM_at	0.00423913	1.07856	down	---	---	---	gb:AA891903 /DB_XREF=gi:3018782 /DB_XREF=EST195706 /CLONE=RKIAI35 /FEA=EST /CNT=1 /TID=Rn.14719.1 /TIER=ConsEnd /STK=1 /UG=Rn.14719 /UG_TITLE=EST	AA891903	---
1385072_PM_at	0.0210489	1.1595	down	Galm	galactose mutarotase (aldose 1-epimerase)	313843	gb:AA997048 /DB_XREF=gi:4280811 /DB_XREF=UI-R-C0-hk-c-03-0-UI.s1 /CLONE=UI-R-C0-hk-c-03-0-UI /FEA=EST /CNT=1 /TID=Rn.23943.1 /TIER=ConsEnd /STK=1 /UG=Rn.23943 /UG_TITLE=ESTs	AA997048	ENSRNOG00000007023
1385111_PM_at	0.00635128	1.12644	down	---	---	---	gb:AA874842 /DB_XREF=gi:4230725 /DB_XREF=UI-R-E0-cg-g-08-0-UI.s1 /CLONE=UI-R-E0-cg-g-08-0-UI /FEA=EST /CNT=1 /TID=Rn.3141.1 /TIER=ConsEnd /STK=1 /UG=Rn.3141 /UG_TITLE=EST	AA874842	---
1385243_PM_at	0.0119023	1.18964	up	---	---	---	gb:AI180340 /DB_XREF=gi:3730978 /DB_XREF=EST224084 /CLONE=RSPCV05 /FEA=EST /CNT=1 /TID=Rn.6545.3 /TIER=ConsEnd /STK=1 /UG=Rn.6545 /UG_TITLE=ESTs	AI180340	---
1385458_PM_a_at	0.00731786	1.1042	down	RGD1306959	similar to C11orf17 protein	361624	gb:AA799992 /DB_XREF=gi:2862947 /DB_XREF=EST189489 /CLONE=RHEAI02 /FEA=EST /CNT=1 /TID=Rn.40386.3 /TIER=ConsEnd /STK=1 /UG=Rn.40386 /UG_TITLE=ESTs	AA799992	ENSRNOG00000013744
1385616_PM_a_at	0.0311972	1.09906	down	Asf1a	ASF1 anti-silencing function 1 homolog A (S. cerevisiae)	294408	gb:AI137136 /DB_XREF=gi:3637913 /DB_XREF=UI-R-C2p-oe-g-04-0-UI.s1 /CLONE=UI-R-C2p-oe-g-04-0-UI /FEA=EST /CNT=1 /TID=Rn.7418.3 /TIER=ConsEnd /STK=0 /UG=Rn.7418 /UG_TITLE=ESTs, Highly similar to T08661 anti-silencing protein ASF1 homolog DKFZp547E2110.1 (H.sapiens)	AI137136	ENSRNOG00000000415
1385742_PM_at	0.0130206	1.15037	down	---	---	---	gb:BF388632 /DB_XREF=gi:11373456 /DB_XREF=UI-R-BS2-bdd-g-05-0-UI.s1 /CLONE=UI-R-BS2-bdd-g-05-0-UI /FEA=EST /CNT=1 /TID=Rn.56787.1 /TIER=ConsEnd /STK=0 /UG=Rn.56787 /UG_TITLE=EST, Weakly similar to Ig lambda-2 chain C region (R.norvegicus)	BF388632	---
1385818_PM_at	0.0175809	1.11836	down	---	---	---	gb:AA866435 /DB_XREF=gi:4230655 /DB_XREF=UI-R-E0-ch-f-03-0-UI.s1 /CLONE=UI-R-E0-ch-f-03-0-UI /FEA=EST /CNT=1 /TID=Rn.3107.1 /TIER=ConsEnd /STK=0 /UG=Rn.3107 /UG_TITLE=EST	AA866435	---
1385866_PM_at	0.0497058	1.0667	down	---	---	---	gb:AA901198 /DB_XREF=gi:4233699 /DB_XREF=UI-R-A1-dp-e-01-0-UI.s1 /CLONE=UI-R-A1-dp-e-01-0-UI /FEA=EST /CNT=1 /TID=Rn.9397.2 /TIER=ConsEnd /STK=0 /UG=Rn.9397 /UG_TITLE=ESTs, Moderately similar to RNP RAT RIBONUCLEASE PANCREATIC PRECURSOR (R.norvegicus)	AA901198	---
1385872_PM_at	0.00573424	1.13791	down	Dhx36	DEAH (Asp-Glu-Ala-His) box polypeptide 36	310461	gb:AI237532 /DB_XREF=gi:3831038 /DB_XREF=EST234094 /CLONE=RPLDA27 /FEA=EST /CNT=5 /TID=Rn.18656.1 /TIER=ConsEnd /STK=0 /UG=Rn.18656 /UG_TITLE=ESTs	AI237532	---
1386018_PM_at	0.0386341	1.11003	up	---	---	---	gb:AI176253 /DB_XREF=gi:3726891 /DB_XREF=EST219834 /CLONE=ROVBP18 /FEA=EST /CNT=2 /TID=Rn.55648.1 /TIER=ConsEnd /STK=1 /UG=Rn.55648 /UG_TITLE=ESTs	AI176253	---
1386186_PM_s_at	0.0172609	1.1386	up	---	---	---	gb:H31802 /DB_XREF=gi:977219 /DB_XREF=EST106213 /CLONE=RPCAY40 /FEA=EST /CNT=1 /TID=Rn.42138.1 /TIER=ConsEnd /STK=1 /UG=Rn.42138 /UG_TITLE=EST, Moderately similar to S12207 hypothetical protein (M.musculus)	H31802	---
1386321_PM_s_at	0.020932	1.25015	up	Trib3	tribbles homolog 3 (Drosophila)	246273	gb:H31287 /DB_XREF=gi:976704 /DB_XREF=EST105188 /CLONE=RPCAG66 /FEA=EST /CNT=1 /TID=Rn.22325.2 /TIER=ConsEnd /STK=1 /UG=Rn.22325 /UG_TITLE=ESTs, Weakly similar to putative serinethreonine protein kinase MAK-V (M.musculus)	H31287	---
1386425_PM_at	0.0365186	1.14849	up	---	---	---	gb:H33472 /DB_XREF=gi:978889 /DB_XREF=EST109511 /CLONE=RPNAS43 /FEA=EST /CNT=1 /TID=Rn.14642.1 /TIER=ConsEnd /STK=1 /UG=Rn.14642 /UG_TITLE=EST	H33472	---
1386430_PM_at	0.017722	1.06376	down	---	---	---	gb:AI639183 /DB_XREF=gi:4700217 /DB_XREF=rx00561s /CLONE=rx00561 /FEA=EST /CNT=1 /TID=Rn.43196.1 /TIER=ConsEnd /STK=1 /UG=Rn.43196 /UG_TITLE=EST	AI639183	---
1386470_PM_at	0.00442718	1.23068	down	---	---	---	gb:H33577 /DB_XREF=gi:978994 /DB_XREF=EST109715 /CLONE=RPNAU17 /FEA=EST /CNT=1 /TID=Rn.14649.1 /TIER=ConsEnd /STK=1 /UG=Rn.14649 /UG_TITLE=EST	H33577	---
1386478_PM_at	0.0233316	1.07562	up	Mcart1	mitochondrial carrier triple repeat 1	313241	gb:H33101 /DB_XREF=gi:978518 /DB_XREF=EST108789 /CLONE=RPNAH27 /FEA=EST /CNT=1 /TID=Rn.9269.3 /TIER=ConsEnd /STK=1 /UG=Rn.9269 /UG_TITLE=ESTs	H33101	ENSRNOG00000039278
1386493_PM_at	0.0191981	1.1579	up	---	---	---	gb:AA893985 /DB_XREF=gi:3020864 /DB_XREF=EST197788 /CLONE=RPLAO24 /FEA=EST /CNT=1 /TID=Rn.14842.1 /TIER=ConsEnd /STK=1 /UG=Rn.14842 /UG_TITLE=EST	AA893985	---
1386512_PM_at	0.00939032	1.11748	down	Zfp91	Zinc finger protein 91	246282	gb:BE112093 /DB_XREF=gi:8504198 /DB_XREF=UI-R-BJ1-avk-e-12-0-UI.s1 /CLONE=UI-R-BJ1-avk-e-12-0-UI /FEA=EST /CNT=1 /TID=Rn.12940.2 /TIER=ConsEnd /STK=1 /UG=Rn.12940 /UG_TITLE=ESTs, Highly similar to I48724 zinc finger protein PZF - mouse (M.musculus)	BE112093	---
1386514_PM_at	0.0413386	1.07162	down	Hapln4	Hyaluronan and proteoglycan link protein 4	361129	gb:AA819731 /DB_XREF=gi:4228029 /DB_XREF=UI-R-A0-ap-g-11-0-UI.s1 /CLONE=UI-R-A0-ap-g-11-0-UI /FEA=EST /CNT=1 /TID=Rn.53950.2 /TIER=ConsEnd /STK=1 /UG=Rn.53950 /UG_TITLE=ESTs	AA819731	---
1386648_PM_at	0.00502069	1.17738	up	Dnajc6	DnaJ (Hsp40) homolog, subfamily C, member 6	313409	gb:AW914996 /DB_XREF=gi:8080680 /DB_XREF=EST346300 /CLONE=RGIBN29 /FEA=EST /CNT=1 /TID=Rn.23812.3 /TIER=ConsEnd /STK=0 /UG=Rn.23812 /UG_TITLE=ESTs	AW914996	ENSRNOG00000011968
1386781_PM_at	0.036719	1.11305	down	---	---	---	gb:BF544537 /DB_XREF=gi:11635644 /DB_XREF=UI-R-BT0-pz-b-06-0-UI.r1 /CLONE=UI-R-BT0-pz-b-06-0-UI /FEA=EST /CNT=1 /TID=Rn.28634.2 /TIER=ConsEnd /STK=0 /UG=Rn.28634 /UG_TITLE=ESTs	BF544537	---
1386890_PM_at	0.00416252	1.11562	down	S100a10	S100 calcium binding protein A10	81778	gb:NM_031114.1 /DB_XREF=gi:13592078 /GEN=S100A10 /FEA=FLmRNA /CNT=36 /TID=Rn.4083.1 /TIER=FL+Stack /STK=25 /UG=Rn.4083 /LL=81778 /DEF=Rattus norvegicus S-100 related protein, clone 42C (S100A10), mRNA. /PROD=S-100 related protein, clone 42C /FL=gb:J03627.1 gb:NM_031114.1	NM_031114	ENSRNOG00000023226
1386904_PM_a_at	0.00945413	1.11084	down	Cyb5a	cytochrome b5 type A (microsomal)	64001	gb:AF007107.1 /DB_XREF=gi:2257954 /FEA=FLmRNA /CNT=1 /TID=Rn.1055.2 /TIER=FL /STK=1 /UG=Rn.1055 /LL=64001 /UG_GENE=Cyb5 /DEF=Rattus norvegicus soluble cytochrome b5 mRNA, complete cds. /PROD=cytochrome b5 /FL=gb:AF007107.1	AF007107	ENSRNOG00000015205
1386934_PM_at	0.0393987	1.06149	up	Slc6a8	solute carrier family 6 (neurotransmitter transporter, creatine), member 8	50690	gb:NM_017348.1 /DB_XREF=gi:8393112 /GEN=CHOT1 /FEA=FLmRNA /CNT=29 /TID=Rn.10336.1 /TIER=FL+Stack /STK=17 /UG=Rn.10336 /LL=50690 /DEF=Rattus norvegicus choline transporter (CHOT1), mRNA. /PROD=choline transporter /FL=gb:NM_017348.1	NM_017348	ENSRNOG00000032701
1386936_PM_at	0.0223531	1.17858	down	Grifin	galectin-related inter-fiber protein	117130	gb:NM_057187.1 /DB_XREF=gi:17105337 /GEN=Grifin /FEA=FLmRNA /CNT=17 /TID=Rn.26894.1 /TIER=FL+Stack /STK=17 /UG=Rn.26894 /LL=117130 /DEF=Rattus norvegicus galectin-related inter-fiber protein (Grifin), mRNA. /PROD=galectin-related inter-fiber protein /FL=gb:AF082160.1 gb:NM_057187.1	NM_057187	ENSRNOG00000001251
1386965_PM_at	0.0274815	1.22465	down	Lpl	lipoprotein lipase	24539	gb:NM_012598.1 /DB_XREF=gi:6981167 /GEN=Lpl /FEA=FLmRNA /CNT=41 /TID=Rn.3834.1 /TIER=FL+Stack /STK=14 /UG=Rn.3834 /LL=24539 /DEF=Rattus norvegicus Lipoprotein lipase (Lpl), mRNA. /PROD=lipoprotein lipase /FL=gb:L03294.1 gb:NM_012598.1	NM_012598	ENSRNOG00000012181
1386981_PM_at	0.00777031	1.10226	down	Slc16a1	solute carrier family 16, member 1 (monocarboxylic acid transporter 1)	25027	gb:NM_012716.1 /DB_XREF=gi:6981541 /GEN=Slc16a1 /FEA=FLmRNA /CNT=23 /TID=Rn.6085.1 /TIER=FL+Stack /STK=13 /UG=Rn.6085 /LL=25027 /DEF=Rattus norvegicus Solute carrier 16 (monocarboxylic acid transporter), member 1 (Slc16a1), mRNA. /PROD=solute carrier 16 (monocarboxylic acidtransporter), member 1 /FL=gb:D63834.1 gb:NM_012716.1	NM_012716	ENSRNOG00000019996
1386997_PM_at	0.00906139	1.12712	down	Eif4e	eukaryotic translation initiation factor 4E	117045	gb:BF567962 /DB_XREF=gi:11677692 /DB_XREF=UI-R-BO0-ahw-c-10-0-UI.r1 /CLONE=UI-R-BO0-ahw-c-10-0-UI /FEA=FLmRNA /CNT=26 /TID=Rn.11275.1 /TIER=ConsEnd /STK=0 /UG=Rn.11275 /LL=117045 /UG_GENE=Eif4e /UG_TITLE=eukaryotic translation initiation factor 4E /FL=gb:NM_053974.1	BF567962	---
1387002_PM_at	0.0119891	1.11105	down	Bud31	BUD31 homolog (yeast)	89819	gb:NM_053556.1 /DB_XREF=gi:16758327 /GEN=G10 /FEA=FLmRNA /CNT=17 /TID=Rn.8172.1 /TIER=FL+Stack /STK=12 /UG=Rn.8172 /LL=89819 /DEF=Rattus norvegicus maternal G10 transcript (G10), mRNA. /PROD=maternal G10 transcript /FL=gb:AF058791.1 gb:NM_053556.1	NM_053556	ENSRNOG00000000989
1387011_PM_at	0.0155872	1.1431	down	Lcn2	lipocalin 2	170496	gb:NM_130741.1 /DB_XREF=gi:18543344 /GEN=Lcn2 /FEA=FLmRNA /CNT=14 /TID=Rn.11303.1 /TIER=FL+Stack /STK=12 /UG=Rn.11303 /LL=170496 /DEF=Rattus norvegicus lipocalin 2 (Lcn2), mRNA. /PROD=lipocalin 2 /FL=gb:NM_130741.1	NM_130741	ENSRNOG00000013973
1387042_PM_at	0.014173	1.17026	up	Cacnb3	calcium channel, voltage-dependent, beta 3 subunit	25297	gb:NM_012828.1 /DB_XREF=gi:6978582 /GEN=Cacnb3 /FEA=FLmRNA /CNT=12 /TID=Rn.2808.1 /TIER=FL+Stack /STK=10 /UG=Rn.2808 /LL=25297 /DEF=Rattus norvegicus Calcium channel subunit beta 3 (Cacnb3), mRNA. /PROD=calcium channel subunit beta 3 /FL=gb:NM_012828.1 gb:M88751.1	NM_012828	ENSRNOG00000012489
1387055_PM_at	0.0315678	1.11528	down	Nae1	NEDD8 activating enzyme E1 subunit 1	84019	gb:U90829.1 /DB_XREF=gi:4099877 /FEA=FLmRNA /CNT=23 /TID=Rn.4279.1 /TIER=FL+Stack /STK=9 /UG=Rn.4279 /LL=84019 /UG_GENE=Appbp1 /DEF=Rattus norvegicus APP-binding protein 1 mRNA, complete cds. /PROD=APP-binding protein 1 /FL=gb:U90829.1 gb:NM_032072.1	U90829	ENSRNOG00000033133
1387058_PM_at	0.00185358	1.14777	down	Pctp	phosphatidylcholine transfer protein	29510	gb:NM_017225.1 /DB_XREF=gi:8393921 /GEN=Pctp /FEA=FLmRNA /CNT=12 /TID=Rn.9487.1 /TIER=FL+Stack /STK=9 /UG=Rn.9487 /LL=29510 /DEF=Rattus norvegicus phosphatidylcholine transfer protein (Pctp), mRNA. /PROD=phosphatidylcholine transfer protein /FL=gb:NM_017225.1	NM_017225	ENSRNOG00000002425
1387060_PM_at	0.0235096	1.13098	up	Klf6	Kruppel-like factor 6	58954	gb:NM_031642.1 /DB_XREF=gi:13928883 /GEN=Copeb /FEA=FLmRNA /CNT=15 /TID=Rn.11252.1 /TIER=FL+Stack /STK=9 /UG=Rn.11252 /LL=58954 /DEF=Rattus norvegicus core promoter element binding protein (Copeb), mRNA. /PROD=core promoter element binding protein /FL=gb:AF001417.1 gb:NM_031642.1	NM_031642	---
1387064_PM_at	0.00108746	1.17039	down	Pxmp3	peroxisomal membrane protein 3	29534	gb:NM_017234.1 /DB_XREF=gi:8394120 /GEN=Pxmp3 /FEA=FLmRNA /CNT=12 /TID=Rn.4065.1 /TIER=FL+Stack /STK=9 /UG=Rn.4065 /LL=29534 /DEF=Rattus norvegicus peroxisomal membrane protein 3, 35 kDa (Pxmp3), mRNA. /PROD=peroxisomal membrane protein 3, 35 kDa /FL=gb:D30617.1 gb:D30616.1 gb:NM_017234.1	NM_017234	ENSRNOG00000008748
1387065_PM_at	0.0294341	1.1831	down	Plcd4	phospholipase C, delta 4	140693	gb:NM_080688.1 /DB_XREF=gi:18093099 /GEN=Plcd4 /FEA=FLmRNA /CNT=11 /TID=Rn.37434.1 /TIER=FL+Stack /STK=9 /UG=Rn.37434 /LL=140693 /DEF=Rattus norvegicus phospholipase C, delta 4 (Plcd4), mRNA. /PROD=phospholipase C, delta 4 /FL=gb:NM_080688.1 gb:D50455.1 gb:U16655.1	NM_080688	ENSRNOG00000016361
1387071_PM_a_at	0.00673296	1.33881	up	Mapt	microtubule-associated protein tau	29477	gb:BE107978 /DB_XREF=gi:8500083 /DB_XREF=UI-R-CA0-awz-a-06-0-UI.s1 /CLONE=UI-R-CA0-awz-a-06-0-UI /FEA=FLmRNA /CNT=55 /TID=Rn.2455.1 /TIER=Stack /STK=14 /UG=Rn.2455 /LL=29477 /UG_GENE=Mapt /UG_TITLE=microtubule-associated protein tau /FL=gb:NM_017212.1	BE107978	ENSRNOG00000005133
1387107_PM_at	0.00820239	1.22506	up	Zbtb7a	zinc finger and BTB domain containing 7a	117107	gb:NM_054002.1 /DB_XREF=gi:16758915 /GEN=Lrf /FEA=FLmRNA /CNT=8 /TID=Rn.11667.1 /TIER=FL+Stack /STK=8 /UG=Rn.11667 /LL=117107 /DEF=Rattus norvegicus leukemialymphoma related factor (Lrf), mRNA. /PROD=leukemialymphoma related factor /FL=gb:NM_054002.1 gb:D88450.1	NM_054002	ENSRNOG00000020161
1387111_PM_at	0.0113727	1.11439	up	Ddah1	dimethylarginine dimethylaminohydrolase 1	64157	gb:NM_022297.1 /DB_XREF=gi:11560130 /GEN=Ddah1 /FEA=FLmRNA /CNT=21 /TID=Rn.4241.1 /TIER=FL+Stack /STK=7 /UG=Rn.4241 /LL=64157 /DEF=Rattus norvegicus dimethylarginine dimethylaminohydrolase 1 (Ddah1), mRNA. /PROD=dimethylarginine dimethylaminohydrolase 1 /FL=gb:NM_022297.1 gb:D86041.1	NM_022297	---
1387112_PM_at	0.0189655	1.1708	down	Plp1	proteolipid protein 1	24943	gb:NM_030990.1 /DB_XREF=gi:13591879 /GEN=Plp1 /FEA=FLmRNA /CNT=25 /TID=Rn.4550.1 /TIER=FL+Stack /STK=7 /UG=Rn.4550 /LL=24943 /DEF=Rattus norvegicus Proteolipid protein (Pelizaeus-Merzbacher disease, spastic paraplegia 2, uncomplicated) (Plp1), mRNA. /PROD=proteolipid protein (Pelizaeus-Merzbacherdisease, spastic paraplegia 2, uncomplicated) /FL=gb:M11185.1 gb:NM_030990.1	NM_030990	ENSRNOG00000002419
1387125_PM_at	0.00765272	1.12422	down	S100a9	S100 calcium binding protein A9	94195	gb:NM_053587.1 /DB_XREF=gi:16758363 /GEN=S100a9 /FEA=FLmRNA /CNT=9 /TID=Rn.6703.1 /TIER=FL+Stack /STK=7 /UG=Rn.6703 /LL=94195 /DEF=Rattus norvegicus S100 calcium-binding protein A9 (calgranulin B) (S100a9), mRNA. /PROD=S100 calcium-binding protein A9 (calgranulin B) /FL=gb:NM_053587.1 gb:L18948.1	NM_053587	ENSRNOG00000011483
1387135_PM_at	0.0498944	1.29742	down	Adam15	a disintegrin and metallopeptidase domain 15 (metargidin)	57025	gb:NM_020308.1 /DB_XREF=gi:9945327 /GEN=Adam15 /FEA=FLmRNA /CNT=8 /TID=Rn.28393.1 /TIER=FL+Stack /STK=7 /UG=Rn.28393 /LL=57025 /DEF=Rattus norvegicus a disintegrin and metalloproteinase domain (ADAM) 15 (metargidin) (Adam15), mRNA. /PROD=a disintegrin and metalloprotease domain 15 /FL=gb:NM_020308.1	NM_020308	ENSRNOG00000020590
1387146_PM_a_at	0.0041442	1.4325	up	Ednrb	endothelin receptor type B	50672	gb:X57764.1 /DB_XREF=gi:56122 /FEA=mRNA /CNT=1 /TID=Rn.11412.2 /TIER=ConsEnd /STK=0 /UG=Rn.11412 /LL=50672 /UG_GENE=Etb /DEF=Rat mRNA for ET-B endothelin receptor. /PROD=ET-B endothelin receptor	X57764	---
1387151_PM_at	0.0303427	1.11827	down	Nup107	nucleoporin 107	116555	gb:NM_053830.1 /DB_XREF=gi:16758681 /GEN=Nup107 /FEA=FLmRNA /CNT=7 /TID=Rn.11398.1 /TIER=FL+Stack /STK=6 /UG=Rn.11398 /LL=116555 /DEF=Rattus norvegicus nuclear pore complex protein (Nup107), mRNA. /PROD=nuclear pore complex protein /FL=gb:L31840.1 gb:NM_053830.1	NM_053830	---
1387160_PM_at	0.00676719	1.25679	down	Kcne3	potassium voltage-gated channel, Isk-related subfamily, gene 3	63883	gb:NM_022235.1 /DB_XREF=gi:11596856 /GEN=Kcne3 /FEA=FLmRNA /CNT=7 /TID=Rn.44843.1 /TIER=FL+Stack /STK=6 /UG=Rn.44843 /LL=63883 /DEF=Rattus norvegicus mink-related peptide 2 (Kcne3), mRNA. /PROD=mink-related peptide 2 /FL=gb:NM_022235.1	NM_022235	ENSRNOG00000017054
1387169_PM_at	0.0207862	1.077	up	Tle3	transducin-like enhancer of split 3 (E(sp1) homolog, Drosophila)	84424	gb:NM_053400.1 /DB_XREF=gi:16758125 /GEN=Tle3 /FEA=FLmRNA /CNT=18 /TID=Rn.24106.1 /TIER=FL /STK=5 /UG=Rn.24106 /LL=84424 /DEF=Rattus norvegicus transducin-like enhancer of split 3, homolog of Drosophila (Tle3), mRNA. /PROD=transducin-like enhancer of split 3, homolog ofDrosophila /FL=gb:NM_053400.1 gb:AF186092.1	NM_053400	ENSRNOG00000013013
1387177_PM_at	0.0313953	1.13953	down	Vipr2	vasoactive intestinal peptide receptor 2	29555	gb:NM_017238.1 /DB_XREF=gi:8394531 /GEN=Vipr2 /FEA=FLmRNA /CNT=10 /TID=Rn.10011.1 /TIER=FL /STK=5 /UG=Rn.10011 /LL=29555 /DEF=Rattus norvegicus vasoactive intestinal peptide receptor 2 (Vipr2), mRNA. /PROD=vasoactive intestinal peptide receptor 2 /FL=gb:U09631.1 gb:NM_017238.1	NM_017238	ENSRNOG00000004317
1387181_PM_at	0.0380909	1.14556	down	Myf6	myogenic factor 6	25714	gb:NM_013172.1 /DB_XREF=gi:6981231 /GEN=Myf6 /FEA=FLmRNA /CNT=8 /TID=Rn.2236.1 /TIER=FL /STK=5 /UG=Rn.2236 /LL=25714 /DEF=Rattus norvegicus Myogenic factor 6 (herculin) (Myf6), mRNA. /PROD=myogenic factor 6 (herculin) /FL=gb:NM_013172.1 gb:M27151.1	NM_013172	ENSRNOG00000004878
1387189_PM_at	0.000208334	1.18269	down	Slc22a3	solute carrier family 22 (extraneuronal monoamine transporter), member 3	29504	gb:NM_019230.1 /DB_XREF=gi:9507116 /GEN=Slc22a3 /FEA=FLmRNA /CNT=7 /TID=Rn.24231.1 /TIER=FL /STK=5 /UG=Rn.24231 /LL=29504 /DEF=Rattus norvegicus solute carrier family 22, member 3 (Slc22a3), mRNA. /PROD=solute carrier family 22, member 3 /FL=gb:AF055286.1 gb:NM_019230.1	NM_019230	ENSRNOG00000022946
1387199_PM_a_at	0.0260973	1.14585	up	Arhgef9	Cdc42 guanine nucleotide exchange factor (GEF) 9	66013	gb:NM_023957.1 /DB_XREF=gi:13027401 /GEN=Arhgef9 /FEA=FLmRNA /CNT=7 /TID=Rn.64487.1 /TIER=FL /STK=5 /UG=Rn.64487 /LL=66013 /DEF=Rattus norvegicus collybistin I (Arhgef9), mRNA. /PROD=collybistin I /FL=gb:NM_023957.1	NM_023957	---
1387204_PM_at	0.04207	1.15965	up	Negr1	neuronal growth regulator 1	59318	gb:NM_021682.1 /DB_XREF=gi:11067408 /GEN=LOC59318 /FEA=FLmRNA /CNT=6 /TID=Rn.42884.1 /TIER=FL /STK=5 /UG=Rn.42884 /LL=59318 /DEF=Rattus norvegicus Kilon (LOC59318), mRNA. /PROD=Kilon /FL=gb:NM_021682.1 gb:AB017139.1	NM_021682	---
1387205_PM_at	0.0352957	1.14863	down	H2-M3	histocompatibility 2, M region locus 3	24747	gb:NM_022921.1 /DB_XREF=gi:12621071 /GEN=RT1-M3 /FEA=FLmRNA /CNT=6 /TID=Rn.54483.1 /TIER=FL /STK=5 /UG=Rn.54483 /LL=24747 /DEF=Rattus norvegicus RT1 class Ib gene, locus M3 (RT1-M3), mRNA. /PROD=RT1 class Ib gene RT1-M3 /FL=gb:U16025.1 gb:NM_022921.1	NM_022921	---
1387210_PM_at	0.00305212	1.30389	up	Dlg4	discs, large homolog 4 (Drosophila)	29495	gb:NM_019621.1 /DB_XREF=gi:9665226 /GEN=Dlgh4 /FEA=FLmRNA /CNT=7 /TID=Rn.9765.1 /TIER=FL /STK=5 /UG=Rn.9765 /LL=29495 /DEF=Rattus norvegicus discs, large homolog 4 (Drosophila) (Dlgh4), mRNA. /PROD=discs, large homolog 4 (Drosophila) /FL=gb:M96853.1 gb:NM_019621.1	NM_019621	ENSRNOG00000018526
1387211_PM_at	0.0072112	1.17222	up	Barhl1	BarH-like homeobox 1	117232	gb:NM_057109.1 /DB_XREF=gi:16923955 /GEN=Barhl2 /FEA=FLmRNA /CNT=6 /TID=Rn.53445.1 /TIER=FL /STK=5 /UG=Rn.53445 /LL=117232 /DEF=Rattus norvegicus BarH-like 2 (Drosophila) (Barhl2), mRNA. /PROD=BarH (Drosophila)-like 1 /FL=gb:AB043981.1 gb:NM_057109.1	NM_057109	ENSRNOG00000013209
1387215_PM_at	0.00186	1.12591	down	Agxt	alanine-glyoxylate aminotransferase	24792	gb:NM_030656.1 /DB_XREF=gi:13470095 /GEN=Agxt /FEA=FLmRNA /CNT=5 /TID=Rn.9931.1 /TIER=FL /STK=5 /UG=Rn.9931 /LL=24792 /DEF=Rattus norvegicus Alanine-glyoxylate aminotransferase (Serine-pyruvate aminotransferase) (Agxt), mRNA. /PROD=serine-pyruvate aminotransferase /FL=gb:NM_030656.1 gb:M35270.1	NM_030656	ENSRNOG00000023856
1387225_PM_at	0.0029339	1.11731	down	Opa1	optic atrophy 1 homolog (human)	171116	gb:NM_133585.1 /DB_XREF=gi:19424281 /GEN=LOC171116 /FEA=FLmRNA /CNT=13 /TID=Rn.9783.1 /TIER=FL /STK=4 /UG=Rn.9783 /LL=171116 /DEF=Rattus norvegicus RN protein (LOC171116), mRNA. /PROD=RN protein /FL=gb:NM_133585.1 gb:U93197.1	NM_133585	---
1387226_PM_at	0.00936218	1.16271	up	Ina	internexin neuronal intermediate filament protein, alpha	24503	gb:NM_019128.1 /DB_XREF=gi:9506810 /GEN=Inexa /FEA=FLmRNA /CNT=19 /TID=Rn.10966.1 /TIER=FL /STK=4 /UG=Rn.10966 /LL=24503 /DEF=Rattus norvegicus Internexin, alpha (Inexa), mRNA. /PROD=internexin, alpha /FL=gb:NM_019128.1	NM_019128	ENSRNOG00000020248
1387246_PM_at	0.0152251	1.12879	down	Vegp1	von Ebners gland protein 1	65039	gb:NM_022945.1 /DB_XREF=gi:12621113 /GEN=Vegp1 /FEA=FLmRNA /CNT=2 /TID=Rn.37454.1 /TIER=FL /STK=1 /UG=Rn.37454 /LL=65039 /DEF=Rattus norvegicus von Ebners gland protein 1 (Vegp1), mRNA. /PROD=von Ebners gland protein 1 /FL=gb:NM_022945.1	NM_022945	---
1387248_PM_at	0.0255033	1.08088	down	Kcnj5	potassium inwardly-rectifying channel, subfamily J, member 5	29713	gb:D50135.1 /DB_XREF=gi:1890047 /FEA=FLmRNA /CNT=11 /TID=Rn.10047.1 /TIER=FL /STK=1 /UG=Rn.10047 /LL=29713 /UG_GENE=Kcnj5 /DEF=Rattus norvegicus mRNA for inward rectifying K channel, complete cds. /PROD=inward rectifying K channel /FL=gb:D50135.1 gb:NM_017297.1 gb:L35771.1	D50135	---
1387272_PM_at	0.0344591	1.11481	up	Eif2ak1	eukaryotic translation initiation factor 2 alpha kinase 1	27137	gb:NM_013223.1 /DB_XREF=gi:6981045 /GEN=Hri /FEA=FLmRNA /CNT=8 /TID=Rn.11158.1 /TIER=FL /STK=3 /UG=Rn.11158 /LL=27137 /DEF=Rattus norvegicus hemin-sensitive initiation factor 2a kinase (Hri), mRNA. /PROD=hemin-sensitive initiation factor 2a kinase /FL=gb:L27707.1 gb:NM_013223.1	NM_013223	ENSRNOG00000001050
1387274_PM_at	0.0416979	1.16858	up	Dlx5	distal-less homeobox 5	25431	gb:NM_012943.1 /DB_XREF=gi:6978764 /GEN=Dlx5 /FEA=FLmRNA /CNT=7 /TID=Rn.11248.1 /TIER=FL /STK=3 /UG=Rn.11248 /LL=25431 /DEF=Rattus norvegicus Distal-less homeobox (Dlx5), mRNA. /PROD=distal-less homeobox /FL=gb:L24443.1 gb:NM_012943.1	NM_012943	ENSRNOG00000010905
1387284_PM_at	0.00708555	1.06331	up	Dpys	dihydropyrimidinase	65135	gb:NM_031705.1 /DB_XREF=gi:13928983 /GEN=Dpys /FEA=FLmRNA /CNT=5 /TID=Rn.10586.1 /TIER=FL /STK=3 /UG=Rn.10586 /LL=65135 /DEF=Rattus norvegicus dihydropyrimidinase (Dpys), mRNA. /PROD=dihydropyrimidinase /FL=gb:D63704.1 gb:NM_031705.1	NM_031705	ENSRNOG00000004298
1387296_PM_at	0.0424912	1.15782	down	Cyp2j4	cytochrome P450, family 2, subfamily J, polypeptide 4	65210	gb:NM_023025.1 /DB_XREF=gi:12711695 /GEN=Cyp2j4 /FEA=FLmRNA /CNT=4 /TID=Rn.44992.1 /TIER=FL /STK=3 /UG=Rn.44992 /LL=65210 /DEF=Rattus norvegicus CYP2J4 (Cyp2j4), mRNA. /PROD=CYP2J4 /FL=gb:NM_023025.1 gb:L81170.1	NM_023025	ENSRNOG00000031004
1387297_PM_at	0.0283372	1.08133	down	Klrg1	killer cell lectin-like receptor subfamily G, member 1	58975	gb:NM_031649.1 /DB_XREF=gi:13928897 /GEN=Klrg1 /FEA=FLmRNA /CNT=4 /TID=Rn.10256.1 /TIER=FL /STK=3 /UG=Rn.10256 /LL=58975 /DEF=Rattus norvegicus killer cell lectin-like receptor subfamily G, member 1 (Klrg1), mRNA. /PROD=killer cell lectin-like receptor subfamily G,member 1 /FL=gb:NM_031649.1	NM_031649	ENSRNOG00000014918
1387327_PM_at	0.0367811	1.1952	up	Khdrbs2	KH domain containing, RNA binding, signal transduction associated 2	170843	gb:NM_133318.1 /DB_XREF=gi:18959265 /GEN=Slm1 /FEA=FLmRNA /CNT=3 /TID=Rn.49319.1 /TIER=FL /STK=3 /UG=Rn.49319 /DEF=Rattus norvegicus Sam68-like mammalian protein 1 (Slm1), mRNA. /PROD=Sam68-like mammalian protein 1 /FL=gb:AF305618.1 gb:NM_133318.1	NM_133318	ENSRNOG00000012284
1387330_PM_at	0.0366044	1.06943	down	Mepe	matrix extracellular phosphoglycoprotein	79110	gb:NM_024142.1 /DB_XREF=gi:13162323 /GEN=LOC79110 /FEA=FLmRNA /CNT=3 /TID=Rn.51212.1 /TIER=FL /STK=3 /UG=Rn.51212 /LL=79110 /DEF=Rattus norvegicus osteoregulin (LOC79110), mRNA. /PROD=osteoregulin /FL=gb:AF260922.1 gb:NM_024142.1	NM_024142	ENSRNOG00000002154
1387337_PM_at	0.0248999	1.149	down	Cort	cortistatin	25305	gb:NM_012835.1 /DB_XREF=gi:6978682 /GEN=Cort /FEA=FLmRNA /CNT=3 /TID=Rn.10490.1 /TIER=FL /STK=3 /UG=Rn.10490 /LL=25305 /DEF=Rattus norvegicus Preprocortistatin (Cort), mRNA. /PROD=preprocortistatin /FL=gb:NM_012835.1 gb:U51919.1	NM_012835	ENSRNOG00000030317
1387347_PM_at	0.018674	1.30791	up	Igfbp5	insulin-like growth factor binding protein 5	25285	gb:NM_012817.1 /DB_XREF=gi:6981087 /GEN=Igfbp5 /FEA=FLmRNA /CNT=23 /TID=Rn.9994.1 /TIER=FL /STK=2 /UG=Rn.9994 /LL=25285 /DEF=Rattus norvegicus Insulin-like growth factor-binding protein 5 (Igfbp5), mRNA. /PROD=insulin-like growth factor-binding protein 5 /FL=gb:M62781.1 gb:NM_012817.1	NM_012817	ENSRNOG00000017206
1387348_PM_at	0.0221351	1.36706	up	Igfbp5	insulin-like growth factor binding protein 5	25285	gb:BE113270 /DB_XREF=gi:8505375 /DB_XREF=UI-R-BJ1-awd-e-04-0-UI.s1 /CLONE=UI-R-BJ1-awd-e-04-0-UI /FEA=FLmRNA /CNT=23 /TID=Rn.9994.1 /TIER=Stack /STK=10 /UG=Rn.9994 /LL=25285 /UG_GENE=Igfbp5 /UG_TITLE=Insulin-like growth factor-binding protein 5 /FL=gb:M62781.1 gb:NM_012817.1	BE113270	ENSRNOG00000017206
1387357_PM_at	0.00526842	1.15399	down	Tmlhe	trimethyllysine hydroxylase, epsilon	170898	gb:NM_133387.1 /DB_XREF=gi:19173741 /GEN=Tmlh /FEA=FLmRNA /CNT=13 /TID=Rn.3607.1 /TIER=FL /STK=2 /UG=Rn.3607 /DEF=Rattus norvegicus epsilon-trimethyllysine hydroxylase (Tmlh), mRNA. /PROD=epsilon-trimethyllysine hydroxylase /FL=gb:AF374406.1 gb:NM_133387.1	NM_133387	ENSRNOG00000000729
1387367_PM_at	0.0171111	1.27043	up	Glg1	golgi apparatus protein 1	29476	gb:NM_017211.1 /DB_XREF=gi:8393449 /GEN=Selel /FEA=FLmRNA /CNT=12 /TID=Rn.10507.1 /TIER=FL /STK=2 /UG=Rn.10507 /LL=29476 /DEF=Rattus norvegicus selectin, endothelial cell, ligand (Selel), mRNA. /PROD=selectin, endothelial cell, ligand /FL=gb:U08136.1 gb:NM_017211.1	NM_017211	ENSRNOG00000018668
1387375_PM_at	0.0146625	1.17784	down	Khk	ketohexokinase	25659	gb:NM_031855.2 /DB_XREF=gi:18373338 /GEN=Khk /FEA=FLmRNA /CNT=8 /TID=Rn.33324.1 /TIER=FL /STK=2 /UG=Rn.33324 /LL=25659 /DEF=Rattus norvegicus Ketohexokinase (Khk), mRNA. /PROD=ketohexokinase /FL=gb:NM_031855.2	NM_031855	ENSRNOG00000008047
1387394_PM_at	0.0104305	1.10232	down	Il2rb	interleukin 2 receptor, beta	25746	gb:NM_013195.1 /DB_XREF=gi:6981097 /GEN=Il2rb /FEA=FLmRNA /CNT=6 /TID=Rn.5832.1 /TIER=FL /STK=2 /UG=Rn.5832 /LL=25746 /DEF=Rattus norvegicus Interleukin 2 receptor, beta chain (Il2rb), mRNA. /PROD=interleukin 2 receptor, beta chain /FL=gb:NM_013195.1 gb:M55050.1	NM_013195	---
1387399_PM_at	0.00457273	1.06	down	Pclo	piccolo (presynaptic cytomatrix protein)	56768	gb:NM_020098.1 /DB_XREF=gi:10048482 /GEN=LOC56768 /FEA=FLmRNA /CNT=9 /TID=Rn.53925.1 /TIER=FL /STK=2 /UG=Rn.53925 /LL=56768 /DEF=Rattus norvegicus multidomain presynaptic cytomatrix protein Piccolo (LOC56768), mRNA. /PROD=multidomain presynaptic cytomatrix proteinPiccolo /FL=gb:AF227534.1 gb:NM_020098.1 gb:AF138789.2	NM_020098	---
1387409_PM_x_at	0.0457676	1.15513	down	Nlgn3	neuroligin 3	171297	gb:NM_134336.1 /DB_XREF=gi:19705444 /GEN=Nlgn3 /FEA=FLmRNA /CNT=6 /TID=Rn.10263.1 /TIER=FL /STK=2 /UG=Rn.10263 /LL=171297 /DEF=Rattus norvegicus neuroligin 3 (Nlgn3), mRNA. /PROD=neuroligin 3 /FL=gb:NM_134336.1 gb:U41663.1	NM_134336	---
1387438_PM_at	0.00710502	1.12224	down	Ltc4s	leukotriene C4 synthase	114097	gb:NM_053639.2 /DB_XREF=gi:18777698 /GEN=Ltc4s /FEA=FLmRNA /CNT=5 /TID=Rn.38594.1 /TIER=FL /STK=2 /UG=Rn.38594 /DEF=Rattus norvegicus leukotriene C4 synthase (Ltc4s), mRNA. /PROD=leukotriene C4 synthase /FL=gb:AB048790.2 gb:NM_053639.2	NM_053639	ENSRNOG00000003244
1387465_PM_a_at	0.0354494	1.10833	down	Gnrhr	gonadotropin releasing hormone receptor	81668	gb:NM_031038.1 /DB_XREF=gi:13591958 /GEN=Gnrhr /FEA=FLmRNA /CNT=7 /TID=Rn.10268.1 /TIER=FL /STK=2 /UG=Rn.10268 /LL=81668 /DEF=Rattus norvegicus gonadotropin-releasing hormone receptor (Gnrhr), mRNA. /PROD=gonadotropin-releasing hormone receptor /FL=gb:L07646.1 gb:NM_031038.1 gb:L25053.1	NM_031038	ENSRNOG00000002011
1387474_PM_at	0.000467854	1.16016	up	Tacr1	tachykinin receptor 1	24807	gb:J05097.1 /DB_XREF=gi:207051 /FEA=FLmRNA /CNT=4 /TID=Rn.9934.1 /TIER=FL /STK=2 /UG=Rn.9934 /LL=24807 /UG_GENE=Tacr1 /UG_TITLE=Tachykinin 1 receptor (substance P receptor, neurokinin 1 receptor), see also D4Mgh17, D4Wox19 and D4Mit23 /DEF=Rat substance P receptor (SPR) mRNA, complete cds. /FL=gb:M31477.1 gb:NM_012667.1 gb:J05097.1	J05097	ENSRNOG00000005853
1387479_PM_at	0.0172229	1.0945	down	Runx3	runt-related transcription factor 3	156726	gb:NM_130425.1 /DB_XREF=gi:18426855 /GEN=Runx3 /FEA=FLmRNA /CNT=4 /TID=Rn.81066.1 /TIER=FL /STK=2 /UG=Rn.81066 /DEF=Rattus norvegicus Runt related transcription factor 3 (Runx3), mRNA. /PROD=Runt related transcription factor 3 /FL=gb:NM_130425.1 gb:AF421886.1	NM_130425	ENSRNOG00000018058
1387496_PM_a_at	0.0268618	1.10582	down	Cnga3	cyclic nucleotide gated channel alpha 3	85257	gb:AJ272429.1 /DB_XREF=gi:10241816 /FEA=mRNA /CNT=1 /TID=Rn.10886.2 /TIER=ConsEnd /STK=0 /UG=Rn.10886 /LL=85257 /UG_GENE=Cnga3 /DEF=Rattus norvegicus mRNA for cyclic nucleotide-gated channel 2a, splice variant. /PROD=cyclic nucleotide-gated channel 2a	AJ272429	ENSRNOG00000017582
1387498_PM_a_at	0.0165142	1.30473	up	Fgfr1	Fibroblast growth factor receptor 1	79114	gb:S54008.1 /DB_XREF=gi:264804 /GEN=fibroblast growth factor receptor 1 beta-isoform,FGFR-1 beta /FEA=mRNA /CNT=1 /TID=Rn.9797.2 /TIER=ConsEnd /STK=0 /UG=Rn.9797 /LL=79114 /DEF=fibroblast growth factor receptor 1 beta-isoform (Rattus norvegicus=Norway rat, Sprague-Dawley, kidneys, mRNA, 2520 nt). /PROD=fibroblast growth factor receptor 1beta-isoform	S54008	ENSRNOG00000016050
1387504_PM_at	0.0174155	1.06989	down	Il1rl2	interleukin 1 receptor-like 2	171106	gb:NM_133575.1 /DB_XREF=gi:19424265 /GEN=Il1rl2 /FEA=FLmRNA /CNT=3 /TID=Rn.10235.1 /TIER=FL /STK=2 /UG=Rn.10235 /LL=171106 /DEF=Rattus norvegicus interleukin 1 receptor-like 2 (Il1rl2), mRNA. /PROD=interleukin 1 receptor-like 2 /FL=gb:NM_133575.1 gb:U49066.1	NM_133575	ENSRNOG00000014683
1387524_PM_at	0.0437714	1.12006	down	Cysltr2	cysteinyl leukotriene receptor 2	170926	gb:NM_133413.1 /DB_XREF=gi:19173777 /GEN=Cyslt2 /FEA=FLmRNA /CNT=3 /TID=Rn.74252.1 /TIER=FL /STK=2 /UG=Rn.74252 /LL=170926 /DEF=Rattus norvegicus cysteinyl leukotriene CysLT2 receptor (Cyslt2), mRNA. /PROD=cysteinyl leukotriene CysLT2 receptor /FL=gb:AB052661.1 gb:NM_133413.1	NM_133413	ENSRNOG00000015042
1387532_PM_at	0.023373	1.12409	down	Fgf3	fibroblast growth factor 3	170633	gb:NM_130817.1 /DB_XREF=gi:18677744 /GEN=Fgf3 /FEA=FLmRNA /CNT=3 /TID=Rn.81236.1 /TIER=FL /STK=2 /UG=Rn.81236 /DEF=Rattus norvegicus fibroblast growth factor 3 (Fgf3), mRNA. /PROD=fibroblast growth factor 3 /FL=gb:NM_130817.1 gb:AB079262.1	NM_130817	ENSRNOG00000020888
1387569_PM_at	0.044308	1.08928	up	Sv2c	synaptic vesicle glycoprotein 2c	29643	gb:NM_031593.1 /DB_XREF=gi:13928803 /GEN=Sv2c /FEA=FLmRNA /CNT=2 /TID=Rn.74043.1 /TIER=FL /STK=2 /UG=Rn.74043 /LL=29643 /DEF=Rattus norvegicus synaptic vesicle protein 2C (Sv2c), mRNA. /PROD=synaptic vesicle protein 2C /FL=gb:NM_031593.1 gb:AF060174.1	NM_031593	ENSRNOG00000018094
1387592_PM_at	0.00242236	1.2138	down	Akt3	v-akt murine thymoma viral oncogene homolog 3 (protein kinase B, gamma)	29414	gb:NM_031575.1 /DB_XREF=gi:13928777 /GEN=Akt3 /FEA=FLmRNA /CNT=2 /TID=Rn.10506.1 /TIER=FL /STK=2 /UG=Rn.10506 /LL=29414 /DEF=Rattus norvegicus v-akt murine thymoma viral oncogene homolog 3 (protein kinase B gamma) (Akt3), mRNA. /PROD=v-akt murine thymoma viral oncogene homolog 3(protein kinase B gamma) /FL=gb:D49836.1 gb:NM_031575.1	NM_031575	ENSRNOG00000021497
1387599_PM_a_at	0.012815	1.12968	down	Nqo1	NAD(P)H dehydrogenase, quinone 1	24314	gb:J02679.1 /DB_XREF=gi:205741 /FEA=FLmRNA /CNT=21 /TID=Rn.11234.2 /TIER=FL+Stack /STK=8 /UG=Rn.11234 /LL=24314 /UG_GENE=Dia4 /UG_TITLE=Diaphorase (NADHNADPH) /DEF=Rat NAD(P)H:menadione oxidoreductase mRNA, complete cds. /FL=gb:J02608.1 gb:J02679.1	J02679	---
1387627_PM_at	0.00937702	1.11941	down	Cd86	CD86 molecule	56822	gb:NM_020081.1 /DB_XREF=gi:11464988 /GEN=LOC56822 /FEA=FLmRNA /CNT=2 /TID=Rn.48674.1 /TIER=FL /STK=2 /UG=Rn.48674 /LL=56822 /DEF=Rattus norvegicus membrane glycoprotein (LOC56822), mRNA. /PROD=membrane glycoprotein /FL=gb:NM_020081.1 gb:D50558.1	NM_020081	ENSRNOG00000038835
1387632_PM_at	0.0167413	1.09087	down	LOC64038	sertolin	64038	gb:NM_022271.1 /DB_XREF=gi:11560090 /GEN=LOC64038 /FEA=FLmRNA /CNT=2 /TID=Rn.54436.1 /TIER=FL /STK=2 /UG=Rn.54436 /LL=64038 /DEF=Rattus norvegicus sertolin (LOC64038), mRNA. /PROD=sertolin /FL=gb:NM_022271.1 gb:AF107727.2	NM_022271	---
1387643_PM_at	0.0183636	1.10727	down	Fgf21	fibroblast growth factor 21	170580	gb:NM_130752.1 /DB_XREF=gi:18543364 /GEN=Fgf21 /FEA=FLmRNA /CNT=2 /TID=Rn.81231.1 /TIER=FL /STK=2 /UG=Rn.81231 /DEF=Rattus norvegicus fibroblast growth factor 21 (Fgf21), mRNA. /PROD=fibroblast growth factor 21 /FL=gb:AB078901.1 gb:NM_130752.1	NM_130752	ENSRNOG00000020990
1387644_PM_at	0.0281	1.09411	down	Btc	betacellulin	64022	gb:NM_022256.1 /DB_XREF=gi:11560068 /GEN=Btc /FEA=FLmRNA /CNT=2 /TID=Rn.53987.1 /TIER=FL /STK=2 /UG=Rn.53987 /LL=64022 /DEF=Rattus norvegicus betacellulin (Btc), mRNA. /PROD=betacellulin /FL=gb:NM_022256.1 gb:AB028862.1	NM_022256	ENSRNOG00000002728
1387648_PM_at	0.0343511	1.1015	down	Cxcl6	chemokine (C-X-C motif) ligand 6 (granulocyte chemotactic protein 2)	60665	gb:NM_022214.1 /DB_XREF=gi:11559995 /GEN=LOC60665 /FEA=FLmRNA /CNT=2 /TID=Rn.44449.1 /TIER=FL /STK=2 /UG=Rn.44449 /LL=60665 /DEF=Rattus norvegicus CXC chemokine LIX (LOC60665), mRNA. /PROD=CXC chemokine LIX /FL=gb:NM_022214.1 gb:U90448.1	NM_022214	ENSRNOG00000002843
1387657_PM_at	0.00874241	1.32754	up	Kif3c	kinesin family member 3C	85248	gb:AF083330.1 /DB_XREF=gi:3493136 /GEN=KIF3C /FEA=FLmRNA /CNT=16 /TID=Rn.10894.1 /TIER=FL /STK=1 /UG=Rn.10894 /LL=85248 /DEF=Rattus norvegicus kinesin-like protein KIF3C (KIF3C) mRNA, complete cds. /PROD=kinesin-like protein KIF3C /FL=gb:NM_053486.1 gb:AF083330.1 gb:AJ223599.1	AF083330	ENSRNOG00000011394
1387662_PM_at	0.0495731	1.47701	up	Syt4	synaptotagmin IV	64440	gb:L38247.1 /DB_XREF=gi:598376 /FEA=FLmRNA /CNT=16 /TID=Rn.54603.1 /TIER=FL /STK=1 /UG=Rn.54603 /LL=64440 /UG_GENE=Syt4 /DEF=Rattus norvegicus (clone PCR2) synaptotagmin IV mRNA, complete cds. /PROD=synaptotagmin IV /FL=gb:L38247.1 gb:U14398.1 gb:NM_031693.1	L38247	ENSRNOG00000017333
1387663_PM_at	0.00259823	1.12297	down	Gmfb	glia maturation factor, beta	81661	gb:NM_031032.1 /DB_XREF=gi:13624294 /GEN=Gmfb /FEA=FLmRNA /CNT=10 /TID=Rn.10454.1 /TIER=FL /STK=1 /UG=Rn.10454 /LL=81661 /DEF=Rattus norvegicus glia maturation factor beta (Gmfb), mRNA. /PROD=glia maturation factor beta /FL=gb:NM_031032.1	NM_031032	ENSRNOG00000010061
1387668_PM_at	0.0403973	1.26625	up	Ptpn11	protein tyrosine phosphatase, non-receptor type 11	25622	gb:U05963.1 /DB_XREF=gi:458332 /FEA=FLmRNA /CNT=12 /TID=Rn.37539.1 /TIER=FL /STK=1 /UG=Rn.37539 /LL=25622 /UG_GENE=Ptpn11 /DEF=Rattus norvegicus Sprague Dawley protein tyrosine phosphatase mRNA, complete cds. /PROD=protein tyrosine phosphatase /FL=gb:NM_013088.1 gb:U05963.1 gb:U09307.1	U05963	---
1387684_PM_at	0.0416154	1.10699	up	Ppard	peroxisome proliferator-activated receptor delta	25682	gb:U75918.1 /DB_XREF=gi:3779002 /FEA=FLmRNA /CNT=5 /TID=Rn.10199.1 /TIER=FL /STK=1 /UG=Rn.10199 /LL=25682 /UG_GENE=Ppard /DEF=Rattus norvegicus peroxisome proliferator activated receptor delta mRNA, complete cds. /PROD=peroxisome proliferator activated receptordelta /FL=gb:U40064.1 gb:NM_013141.1 gb:U75918.1	U75918	ENSRNOG00000000503
1387699_PM_at	0.0181287	1.10644	down	Cnga2	cyclic nucleotide gated channel alpha 2	25411	gb:AF126808.1 /DB_XREF=gi:5281307 /FEA=FLmRNA /CNT=3 /TID=Rn.10384.1 /TIER=FL /STK=1 /UG=Rn.10384 /LL=25411 /UG_GENE=Cncg4 /DEF=Rattus norvegicus olfactory cyclic nucleotide-gated ion channel alpha subunit mRNA, complete cds. /PROD=olfactory cyclic nucleotide-gated ion channelalpha subunit /FL=gb:NM_012928.1 gb:AF126808.1	AF126808	ENSRNOG00000030119
1387708_PM_at	0.000811597	1.17604	up	Adra2a	adrenergic, alpha-2A-, receptor	25083	gb:U79031.1 /DB_XREF=gi:3282234 /FEA=FLmRNA /CNT=3 /TID=Rn.44299.1 /TIER=FL /STK=1 /UG=Rn.44299 /LL=25083 /UG_GENE=Adra2a /DEF=Rattus norvegicus alpha2D adrenergic receptor mRNA, complete cds. /PROD=alpha2D adrenergic receptor /FL=gb:U79031.1 gb:NM_012739.1	U79031	---
1387714_PM_at	0.00605145	1.21383	down	Crem	cAMP responsive element modulator	25620	gb:AB031423.1 /DB_XREF=gi:5790252 /GEN=CREM /FEA=FLmRNA /CNT=3 /TID=Rn.10251.1 /TIER=FL /STK=1 /UG=Rn.10251 /LL=25620 /DEF=Rattus norvegicus mRNA for CREM-17X, complete cds. /PROD=CREM-17X /FL=gb:NM_013086.1 gb:AB031423.1 gb:U04835.1	AB031423	---
1387734_PM_at	0.0448104	1.09233	down	Bmp15	bone morphogenetic protein 15	59302	gb:NM_021670.1 /DB_XREF=gi:11067388 /GEN=Bmp15 /FEA=FLmRNA /CNT=2 /TID=Rn.42867.1 /TIER=FL /STK=1 /UG=Rn.42867 /LL=59302 /DEF=Rattus norvegicus bone morphogenetic protein 15 (Bmp15), mRNA. /PROD=bone morphogenetic protein 15 /FL=gb:NM_021670.1	NM_021670	ENSRNOG00000002984
1387756_PM_s_at	0.0250098	1.14341	down	Hemgn	hemogen	113882	gb:NM_133294.1 /DB_XREF=gi:19882214 /GEN=Edag1 /FEA=FLmRNA /CNT=1 /TID=Affx.1.23 /TIER=FL /STK=1 /NOTE=sequence(s) not in UniGene /DEF=Rattus norvegicus erythroid differentiation gene 1 (Edag1), mRNA. /PROD=erythroid differentiation gene 1 /FL=gb:NM_133294.1	NM_133294	ENSRNOG00000009436
1387768_PM_at	0.02385	1.13881	down	Mb	myoglobin	59108	gb:NM_021588.1 /DB_XREF=gi:11024649 /GEN=Mb /FEA=FLmRNA /CNT=61 /TID=Rn.40511.1 /TIER=FL+Stack /STK=54 /UG=Rn.40511 /LL=59108 /DEF=Rattus norvegicus myoglobin (Mb), mRNA. /PROD=myoglobin /FL=gb:AF197916.1 gb:NM_021588.1	NM_021588	ENSRNOG00000004583
1387775_PM_at	0.00966243	1.05833	down	Gtf2a2	general transcription factor IIA, 2	83828	gb:NM_053345.1 /DB_XREF=gi:16758063 /GEN=Gtf2a2 /FEA=FLmRNA /CNT=36 /TID=Rn.4053.1 /TIER=FL+Stack /STK=23 /UG=Rn.4053 /LL=83828 /DEF=Rattus norvegicus general transcription factor IIa, 2 (12kD subunit) (Gtf2a2), mRNA. /PROD=general transcription factor IIa, 2 (12kDsubunit) /FL=gb:NM_053345.1 gb:AF000944.1	NM_053345	---
1387798_PM_a_at	0.0455041	1.07183	down	Cr1l	complement component (3b/4b) receptor 1-like	54243	gb:D42115.1 /DB_XREF=gi:2463608 /FEA=FLmRNA /CNT=19 /TID=Rn.5825.1 /TIER=FL+Stack /STK=7 /UG=Rn.5825 /LL=54243 /UG_GENE=Cr1 /DEF=Rattus norvegicus mRNA for 5I2 antigen, clone 5, complete cds. /PROD=5I2 antigen /FL=gb:D42115.1 gb:NM_019301.1 gb:L36532.1	D42115	ENSRNOG00000008193
1387817_PM_at	0.0259416	1.21815	up	Nsg1	neuron specific gene family member 1	25247	gb:NM_024128.1 /DB_XREF=gi:13162299 /GEN=Bsmrb /FEA=FLmRNA /CNT=27 /TID=Rn.2865.1 /TIER=FL /STK=4 /UG=Rn.2865 /LL=25247 /DEF=Rattus norvegicus Brain specific mRNA B (clone p1a75) (Bsmrb), mRNA. /PROD=brain specific mRNA B (clone p1a75) /FL=gb:NM_024128.1	NM_024128	ENSRNOG00000005700
1387825_PM_at	0.0497432	1.1026	up	Ugt2b	UDP glycosyltransferase 2 family, polypeptide B	24862	gb:NM_031533.1 /DB_XREF=gi:13928717 /GEN=Ugt2b2 /FEA=FLmRNA /CNT=10 /TID=Rn.2521.1 /TIER=FL /STK=1 /UG=Rn.2521 /LL=24862 /DEF=Rattus norvegicus Androsterone UDP-glucuronosyltransferase (Ugt2b2), mRNA. /PROD=androsterone UDP-glucuronosyltransferase /FL=gb:NM_031533.1	NM_031533	---
1387828_PM_at	0.0313623	1.07453	up	Agap2	ArfGAP with GTPase domain, ankyrin repeat and PH domain 2	65218	gb:NM_023026.1 /DB_XREF=gi:12711697 /GEN=Pike /FEA=FLmRNA /CNT=5 /TID=Rn.39061.1 /TIER=FL /STK=1 /UG=Rn.39061 /LL=65218 /DEF=Rattus norvegicus nuclear GTPase PIKE (Pike), mRNA. /PROD=nuclear GTPase PIKE /FL=gb:NM_023026.1 gb:AF280816.1	NM_023026	ENSRNOG00000025584
1387843_PM_at	0.0119506	1.21049	up	Fst	follistatin	24373	gb:NM_012561.1 /DB_XREF=gi:6978856 /GEN=Fst /FEA=FLmRNA /CNT=7 /TID=Rn.22500.1 /TIER=FL /STK=0 /UG=Rn.22500 /LL=24373 /DEF=Rattus norvegicus Follistatin (Fst), mRNA. /PROD=follistatin /FL=gb:NM_012561.1	NM_012561	ENSRNOG00000011631
1387852_PM_at	0.010913	1.13054	down	Thrsp	thyroid hormone responsive	25357	gb:NM_012703.1 /DB_XREF=gi:13487928 /GEN=Thrsp /FEA=FLmRNA /CNT=3 /TID=Rn.81140.1 /TIER=FL /STK=0 /UG=Rn.81140 /LL=24927 /DEF=Rattus norvegicus Thyroid hormone responsive protein (spot14) (Thrsp), mRNA. /PROD=thyroid hormone responsive protein (spot14) /FL=gb:NM_012703.1	NM_012703	ENSRNOG00000012404
1387855_PM_at	0.0297305	1.07666	up	Gdi1	GDP dissociation inhibitor 1	25183	gb:BI278628 /DB_XREF=gi:14925663 /DB_XREF=UI-R-CW0-bxn-h-12-0-UI.s1 /CLONE=UI-R-CW0-bxn-h-12-0-UI /FEA=FLmRNA /CNT=46 /TID=Rn.4000.1 /TIER=Stack /STK=25 /UG=Rn.4000 /LL=25183 /UG_GENE=Gdi1 /UG_TITLE=GDP-dissociation inhibitor 1 /FL=gb:NM_017088.1 gb:U07952.1	BI278628	ENSRNOG00000037245
1387859_PM_at	0.00555793	1.12256	down	Nfs1	NFS1 nitrogen fixation 1 homolog (S. cerevisiae)	84594	gb:AI410876 /DB_XREF=gi:4254380 /DB_XREF=EST239169 /CLONE=RHECY56 /FEA=FLmRNA /CNT=26 /TID=Rn.3151.1 /TIER=Stack /STK=17 /UG=Rn.3151 /LL=84594 /UG_GENE=Nifs /UG_TITLE=cysteine desulfurase /FL=gb:NM_053462.1 gb:AF336041.1	AI410876	ENSRNOG00000019736
1387879_PM_a_at	0.00675277	1.45824	up	Cugbp2	CUG triplet repeat, RNA binding protein 2	29428	gb:AF090695.1 /DB_XREF=gi:4249669 /GEN=NAPOR-3 /FEA=FLmRNA /CNT=2 /TID=Rn.30004.2 /TIER=FL /STK=1 /UG=Rn.30004 /LL=29428 /DEF=Rattus norvegicus apoptosis-related RNA binding protein (NAPOR-3) mRNA, complete cds. /PROD=apoptosis-related RNA binding protein /FL=gb:AF090695.1	AF090695	ENSRNOG00000023661
1387880_PM_at	0.0155838	1.12931	up	Cugbp2	CUG triplet repeat, RNA binding protein 2	29428	gb:AI237598 /DB_XREF=gi:4136342 /DB_XREF=EST234160 /CLONE=RPLDB29 /FEA=FLmRNA /CNT=12 /TID=Rn.30004.1 /TIER=Stack /STK=6 /UG=Rn.30004 /LL=29428 /UG_GENE=Cugbp2 /UG_TITLE=CUG triplet repeat, RNA-binding protein 2 /FL=gb:NM_017197.1	AI237598	---
1387884_PM_at	0.000156436	1.08396	down	Psma5	proteasome (prosome, macropain) subunit, alpha type 5	29672	gb:AI011191 /DB_XREF=gi:3225023 /DB_XREF=EST205642 /CLONE=ROVAQ61 /FEA=FLmRNA /CNT=43 /TID=Rn.1276.1 /TIER=Stack /STK=12 /UG=Rn.1276 /LL=29672 /UG_GENE=Psma5 /UG_TITLE=proteasome (prosome, macropain) subunit, alpha type 5 /FL=gb:NM_017282.1	AI011191	ENSRNOG00000019868
1387911_PM_at	0.00182931	1.13382	down	Rabggtb	Rab geranylgeranyltransferase, beta subunit	25533	gb:L10416.1 /DB_XREF=gi:310207 /FEA=FLmRNA /CNT=19 /TID=Rn.2542.2 /TIER=FL+Stack /STK=11 /UG=Rn.2542 /LL=25533 /UG_GENE=Rabggtb /DEF=Rat rab geranylgeranyl transferase beta-subunit mRNA, complete cds. /PROD=rab geranylgeranyl transferase beta subunit /FL=gb:L10416.1	L10416	ENSRNOG00000009992
1387947_PM_at	0.0270435	1.13946	up	Mafb	v-maf musculoaponeurotic fibrosarcoma oncogene homolog B (avian)	54264	gb:U56241.1 /DB_XREF=gi:1326232 /FEA=FLmRNA /CNT=8 /TID=Rn.10725.1 /TIER=FL /STK=5 /UG=Rn.10725 /LL=54264 /UG_GENE=Mafb /DEF=Rattus norvegicus transcription factor Maf1 mRNA, complete cds. /PROD=Maf1 /FL=gb:U56241.1	U56241	---
1387956_PM_s_at	0.00329423	1.23214	down	Cklf	chemokine-like factor	245978	gb:AF253064.2 /DB_XREF=gi:17105378 /GEN=CKLF1 /FEA=FLmRNA /CNT=5 /TID=Rn.25215.1 /TIER=FL /STK=4 /UG=Rn.25215 /DEF=Rattus norvegicus chemokine-like factor 1 (CKLF1) mRNA, complete cds. /PROD=chemokine-like factor 1 /FL=gb:AF253064.2	AF253064	ENSRNOG00000012752
1387961_PM_at	0.0430518	1.21746	up	Opcml	opioid binding protein/cell adhesion molecule-like	116597	gb:M88709.1 /DB_XREF=gi:203245 /FEA=FLmRNA /CNT=10 /TID=Rn.11366.2 /TIER=FL /STK=3 /UG=Rn.11366 /LL=116597 /UG_GENE=Opcml /DEF=Rattus norvegicus cell adhesion-like molecule mRNA, complete CDS. /PROD=cell adhesion-like molecule /FL=gb:M88709.1	M88709	---
1387977_PM_at	0.0468521	1.09072	down	Nbn	nibrin	85482	gb:AF218575.1 /DB_XREF=gi:9651647 /GEN=NBS1 /FEA=FLmRNA /CNT=11 /TID=Rn.25214.1 /TIER=FL /STK=2 /UG=Rn.25214 /LL=85482 /DEF=Rattus norvegicus Nbs1 (NBS1) mRNA, complete cds. /PROD=Nbs1 /FL=gb:AF218575.1	AF218575	ENSRNOG00000008580
1388010_PM_at	0.00522581	1.17213	down	---	---	---	gb:AF303035.1 /DB_XREF=gi:11992033 /FEA=FLmRNA /CNT=3 /TID=Rn.54966.1 /TIER=FL /STK=1 /UG=Rn.54966 /DEF=Rattus norvegicus antisense RNA overlapping MCH protein mRNA, complete cds. /PROD=antisense RNA overlapping MCH protein /FL=gb:AF303035.1	AF303035	ENSRNOG00000004682
1388011_PM_a_at	0.0455883	1.35302	up	Tgfb2	transforming growth factor, beta 2	81809	gb:AF135598.1 /DB_XREF=gi:4580714 /FEA=FLmRNA /CNT=3 /TID=Rn.24539.2 /TIER=FL /STK=1 /UG=Rn.24539 /LL=81809 /UG_GENE=Tgfb2 /DEF=Rattus norvegicus transforming growth factor beta 2 precursor, mRNA, complete cds. /PROD=transforming growth factor beta 2 precursor /FL=gb:AF153013.1 gb:AF135598.1	AF135598	ENSRNOG00000002418
1388024_PM_s_at	0.0257045	1.10828	up	Tor1aip1	torsin A interacting protein 1	246314	gb:U20286.1 /DB_XREF=gi:769858 /GEN=LAP1C /FEA=FLmRNA /CNT=2 /TID=Rn.64618.1 /TIER=FL /STK=1 /UG=Rn.64618 /DEF=Rattus norvegicus lamina associated polypeptide 1C (LAP1C) mRNA, complete cds. /PROD=lamina associated polypeptide 1C /FL=gb:U20286.1	U20286	ENSRNOG00000003946
1388031_PM_x_at	0.0122726	1.09265	down	LOC259245 /// Mup5	alpha-2u globulin PGCL5 /// major urinary protein 5	259245 /// 298107	gb:AB039826.1 /DB_XREF=gi:8307691 /FEA=FLmRNA /CNT=2 /TID=Rn.53983.1 /TIER=FL /STK=1 /UG=Rn.53983 /DEF=Rattus norvegicus mRNA for alpha-2u globulin, complete cds, clone:PGCL5. /PROD=alpha-2u globulin /FL=gb:AB039827.1 gb:AB039826.1	AB039826	ENSRNOG00000033130///ENSRNOG00000024745
1388032_PM_a_at	0.00197828	1.17616	down	Cxcl3	chemokine (C-X-C motif) ligand 3	171551	gb:D87927.1 /DB_XREF=gi:9967140 /FEA=FLmRNA /CNT=1 /TID=Rn.10525.2 /TIER=FL /STK=1 /UG=Rn.10525 /LL=171551 /UG_GENE=Cinc2 /DEF=Rattus norvegicus mRNA for CINC-2 alpha, complete cds. /PROD=CINC-2 alpha /FL=gb:D87927.1	D87927	ENSRNOG00000028043
1388034_PM_at	0.0122975	1.31016	up	Kif1b///Cort	kinesin family member 1B///cortistatin	117548 /// 25305	gb:AB070355.1 /DB_XREF=gi:19911180 /GEN=KIF1Bp204 /FEA=FLmRNA /CNT=1 /TID=Affx.1.40 /TIER=FL /STK=1 /NOTE=sequence(s) not in UniGene /DEF=Rattus norvegicus mRNA for kinesin-family protein 1Bp204, complete cds. /PROD=kinesin-family protein 1Bp204 /FL=gb:AB070355.1	AB070355	ENSRNOG00000030317
1388039_PM_a_at	0.0429859	1.14539	up	Gabbr1	gamma-aminobutyric acid (GABA) B receptor 1	81657	gb:AF283276.1 /DB_XREF=gi:14582573 /FEA=FLmRNA /CNT=1 /TID=Rn.30059.4 /TIER=FL /STK=1 /UG=Rn.30059 /LL=81657 /UG_GENE=Gabbr1 /DEF=Rattus norvegicus GABA type B receptor 1f mRNA, complete cds. /PROD=GABA type B receptor 1f /FL=gb:AF283276.1	AF283276	---
1388042_PM_at	0.00605065	1.12012	up	Kcnh8	potassium voltage-gated channel, subfamily H (eag-related), member 8	246325	gb:AF061957.1 /DB_XREF=gi:3659689 /GEN=elk1 /FEA=FLmRNA /CNT=1 /TID=Rn.30029.1 /TIER=FL /STK=1 /UG=Rn.30029 /DEF=Rattus norvegicus potassium channel (elk1) mRNA, complete cds. /PROD=potassium channel /FL=gb:AF061957.1	AF061957	ENSRNOG00000012711
1388048_PM_a_at	0.0358241	1.12344	down	Inpp4b	inositol polyphosphate-4-phosphatase, type II	116699	gb:U96920.1 /DB_XREF=gi:2232032 /FEA=FLmRNA /CNT=1 /TID=Rn.10829.2 /TIER=FL /STK=1 /UG=Rn.10829 /LL=116699 /UG_GENE=Inpp4b /DEF=Rattus norvegicus inositol polyphosphate 4-phosphatase type II-alpha mRNA, complete cds. /PROD=inositol polyphosphate 4-phosphatase typeII-alpha /FL=gb:U96920.1	U96920	ENSRNOG00000018382
1388099_PM_a_at	0.0273389	1.13511	down	Tfpt	TCF3 (E2A) fusion partner	85423	gb:AB029495.1 /DB_XREF=gi:6970378 /GEN=amida /FEA=FLmRNA /CNT=12 /TID=Rn.12922.1 /TIER=FL /STK=5 /UG=Rn.12922 /LL=85423 /DEF=Rattus norvegicus mRNA for Amida, complete cds. /PROD=Amida /FL=gb:AB029495.1	AB029495	ENSRNOG00000013980
1388100_PM_at	0.0344374	1.1859	down	Cdk5rap2	CDK5 regulatory subunit associated protein 2	286919	gb:AF177478.1 /DB_XREF=gi:7330739 /FEA=FLmRNA /CNT=5 /TID=Rn.25368.1 /TIER=FL /STK=4 /UG=Rn.25368 /DEF=Rattus norvegicus clone C48 CDK5 activator-binding protein mRNA, complete cds. /PROD=CDK5 activator-binding protein /FL=gb:AF177478.1	AF177478	ENSRNOG00000005788
1388101_PM_at	0.0195362	1.73432	up	Dpysl3	dihydropyrimidinase-like 3	25418	gb:AF389425.1 /DB_XREF=gi:14518292 /GEN=Crmp4 /FEA=FLmRNA /CNT=8 /TID=Rn.8499.1 /TIER=FL /STK=3 /UG=Rn.8499 /DEF=Rattus norvegicus collapsin response mediator protein 4 (Crmp4) mRNA, complete cds. /PROD=collapsin response mediator protein 4 /FL=gb:AF389425.1	AF389425	ENSRNOG00000018992
1388102_PM_at	0.011723	1.25192	down	Ptgr1	prostaglandin reductase 1	192227	gb:U66322.2 /DB_XREF=gi:6012070 /GEN=DIG-1 /FEA=FLmRNA /CNT=7 /TID=Rn.10656.1 /TIER=FL /STK=1 /UG=Rn.10656 /DEF=Rattus norvegicus dithiolethione-inducible gene-1 (DIG-1) mRNA, complete cds. /PROD=dithiolethione-inducible gene-1 /FL=gb:U66322.2	U66322	ENSRNOG00000015072
1388127_PM_at	0.0116571	1.1542	down	Cyp4v3	cytochrome P450, family 4, subfamily v, polypeptide 3	266761	gb:AI170346 /DB_XREF=gi:3710386 /DB_XREF=EST216272 /CLONE=RLUCH20 /FEA=mRNA /CNT=17 /TID=Rn.8023.1 /TIER=Stack /STK=14 /UG=Rn.8023 /UG_TITLE=Rattus norvegicus cytochrome P450-like protein mRNA, partial cds	AI170346	---
1388134_PM_at	0.035415	1.06779	down	Eef1d	eukaryotic translation elongation factor 1 delta (guanine nucleotide exchange protein)	300033	gb:BG380216 /DB_XREF=gi:13304688 /DB_XREF=UI-R-CS0-btq-d-07-0-UI.s1 /CLONE=UI-R-CS0-btq-d-07-0-UI /FEA=mRNA /CNT=14 /TID=Rn.971.1 /TIER=Stack /STK=11 /UG=Rn.971 /LL=94171 /UG_GENE=Eef1d /UG_TITLE=translation elongation factor 1-delta subunit	BG380216	ENSRNOG00000021638
1388135_PM_at	0.0264766	1.10206	down	Rpa2	replication protein A2	59102	gb:BM385924 /DB_XREF=gi:18185977 /DB_XREF=UI-R-DN1-ckf-k-13-0-UI.s1 /CLONE=UI-R-DN1-ckf-k-13-0-UI /FEA=mRNA /CNT=12 /TID=Rn.40389.1 /TIER=Stack /STK=11 /UG=Rn.40389 /LL=59102 /UG_GENE=Rpa2 /UG_TITLE=p32-subunit of replication protein A	BM385924	ENSRNOG00000013005
1388136_PM_at	0.00450958	1.10323	down	Timm9	translocase of inner mitochondrial membrane 9 homolog (yeast)	171139	gb:BF282660 /DB_XREF=gi:11213730 /DB_XREF=EST447251 /CLONE=RGIDR37 /FEA=mRNA /CNT=17 /TID=Rn.8459.1 /TIER=Stack /STK=10 /UG=Rn.8459 /LL=171139 /UG_GENE=Timm9 /UG_TITLE=translocase of inner mitochondrial membrane 9 homolog (yeast)	BF282660	---
1388137_PM_a_at	0.0296453	1.07973	down	Fez2	fasciculation and elongation protein zeta 2 (zygin II)	94269	gb:AA955230 /DB_XREF=gi:4237592 /DB_XREF=UI-R-A1-ej-f-12-0-UI.s1 /CLONE=UI-R-A1-ej-f-12-0-UI /FEA=mRNA /CNT=11 /TID=Rn.8714.1 /TIER=Stack /STK=10 /UG=Rn.8714 /LL=94269 /UG_GENE=Fez2 /UG_TITLE=fasciculation and elongation protein zeta 2 (zygin II)	AA955230	ENSRNOG00000004577
1388141_PM_at	0.0274753	1.11873	down	Cetn3	centrin 3	170895	gb:BI293883 /DB_XREF=gi:14955805 /DB_XREF=UI-R-DK0-cdw-b-05-0-UI.s1 /CLONE=UI-R-DK0-cdw-b-05-0-UI /FEA=mRNA /CNT=27 /TID=Rn.3974.1 /TIER=Stack /STK=8 /UG=Rn.3974 /UG_TITLE=Rattus norvegicus centrosomal protein centrin 3 mRNA, partial cds	BI293883	ENSRNOG00000015711
1388154_PM_at	0.00616171	1.16872	down	E2f5	E2F transcription factor 5	116651	gb:U31668.1 /DB_XREF=gi:939730 /FEA=mRNA /CNT=11 /TID=Rn.10286.1 /TIER=Stack /STK=6 /UG=Rn.10286 /LL=116651 /UG_GENE=E2f5 /DEF=Rattus norvegicus transcription factor E2F-5 mRNA, partial cds. /PROD=E2F-5	U31668	ENSRNOG00000010760
1388155_PM_at	0.0362473	1.23601	down	Krt18	keratin 18	294853	gb:BI286012 /DB_XREF=gi:14940236 /DB_XREF=UI-R-CX0s-ccu-d-10-0-UI.s1 /CLONE=UI-R-CX0s-ccu-d-10-0-UI /FEA=mRNA /CNT=9 /TID=Rn.11104.1 /TIER=Stack /STK=6 /UG=Rn.11104 /UG_TITLE=Rattus norvegicus cytokeratin-18 mRNA, partial cds	BI286012	---
1388166_PM_at	0.0353651	1.14029	down	Igh-6 /// LOC314509 /// LOC678701	immunoglobulin heavy chain 6 /// similar to single chain Fv antibody fragment scFv 7-10A /// hypothetical protein LOC678701	299357 /// 314509 /// 678701	gb:AI411693 /DB_XREF=gi:4255197 /DB_XREF=EST239987 /CLONE=ROVEM18 /FEA=mRNA /CNT=15 /TID=Rn.4149.1 /TIER=ConsEnd /STK=4 /UG=Rn.4149 /UG_TITLE=R.norvegicus mRNA for Ig rearranged mu-chain C region, exons 2-4	AI411693	ENSRNOG00000034190
1388171_PM_at	0.0293544	1.10791	down	Cdk7	cyclin-dependent kinase 7	171150	gb:AW916118 /DB_XREF=gi:8081836 /DB_XREF=EST347422 /CLONE=RGIDI27 /FEA=mRNA /CNT=10 /TID=Rn.10331.1 /TIER=ConsEnd /STK=3 /UG=Rn.10331 /LL=171150 /UG_GENE=Cdk7 /UG_TITLE=cyclin-dependent kinase 7 (MO15 homolog, Xenopus laevis, cdk-activating kinase)	AW916118	ENSRNOG00000018510
1388172_PM_at	0.0210296	1.09522	up	Slc22a25	solute carrier family 22, member 25	192273	gb:Y09945.1 /DB_XREF=gi:3004481 /GEN=UST1r /FEA=mRNA /CNT=7 /TID=Rn.31066.1 /TIER=ConsEnd /STK=3 /UG=Rn.31066 /DEF=Rattus norvegicus mRNA for putative integral membrane transport protein (UST1r). /PROD=putative integral membrane transport protein	Y09945	ENSRNOG00000017964
1388179_PM_at	0.028152	1.21556	up	Acvr2b	activin A receptor, type IIB	25366	gb:AI548799 /DB_XREF=gi:4466287 /DB_XREF=UI-R-C3-tr-g-08-0-UI.s1 /CLONE=UI-R-C3-tr-g-08-0-UI /FEA=mRNA /CNT=5 /TID=Rn.24240.1 /TIER=ConsEnd /STK=2 /UG=Rn.24240 /LL=25366 /UG_GENE=Acvr2b /UG_TITLE=Activine receptor 2b (transmembrane serine kinase)	AI548799	ENSRNOG00000014477
1388182_PM_at	0.00138905	1.14221	down	Prim1	DNA primase, p49 subunit	246327	gb:BE108911 /DB_XREF=gi:8501016 /DB_XREF=UI-R-BS1-ayz-g-11-0-UI.s1 /CLONE=UI-R-BS1-ayz-g-11-0-UI /FEA=mRNA /CNT=5 /TID=Rn.38719.1 /TIER=ConsEnd /STK=2 /UG=Rn.38719 /UG_TITLE=Rattus norvegicus DNA primase small subunit mRNA, partial cds	BE108911	---
1388195_PM_at	0.0137002	1.26666	up	Cugbp2	CUG triplet repeat, RNA binding protein 2	29428	gb:AW140475 /DB_XREF=gi:6160211 /DB_XREF=EST290451 /CLONE=RGIAI62 /FEA=mRNA /CNT=11 /TID=Rn.30004.3 /TIER=ConsEnd /STK=0 /UG=Rn.30004 /LL=29428 /UG_GENE=Cugbp2 /UG_TITLE=CUG triplet repeat, RNA-binding protein 2	AW140475	ENSRNOG00000023661
1388199_PM_at	0.00381248	1.18949	down	Epcam	epithelial cell adhesion molecule	171577	gb:BG376410 /DB_XREF=gi:13300882 /DB_XREF=UI-R-CU0-but-b-09-0-UI.s1 /CLONE=UI-R-CU0-but-b-09-0-UI /FEA=mRNA /CNT=7 /TID=Rn.82717.1 /TIER=ConsEnd /STK=0 /UG=Rn.82717 /LL=171577 /UG_GENE=Tacstd1 /UG_TITLE=tumor-associated calcium signal transducer 1	BG376410	ENSRNOG00000015667
1388207_PM_at	0.0252534	1.10287	down	PRP-2	proline-rich protein	287750	gb:BM384711 /DB_XREF=gi:18184764 /DB_XREF=UI-R-CN1-cjl-d-07-0-UI.s2 /CLONE=UI-R-CN1-cjl-d-07-0-UI /FEA=mRNA /CNT=2 /TID=Rn.81196.1 /TIER=ConsEnd /STK=0 /UG=Rn.81196 /UG_TITLE=Rat proline-rich protein mRNA, 3 end	BM384711	---
1388230_PM_at	0.0217948	1.27916	up	Jub	jub, ajuba homolog (Xenopus laevis)	85265	gb:AJ306292.1 /DB_XREF=gi:12711385 /FEA=mRNA /CNT=1 /TID=Rn.64634.1 /TIER=ConsEnd /STK=0 /UG=Rn.64634 /LL=85265 /UG_GENE=Jub /DEF=Rattus norvegicus partial mRNA for Ajuba protein (ORF1). /PROD=Ajuba protein	AJ306292	ENSRNOG00000012791
1388231_PM_at	0.0420017	1.07839	down	Mcpt3	mast cell peptidase 3	290244	gb:U67888.1 /DB_XREF=gi:4097754 /GEN=RMCP-3 /FEA=mRNA /CNT=1 /TID=Rn.42896.1 /TIER=ConsEnd /STK=0 /UG=Rn.42896 /DEF=Rattus norvegicus mast cell protease 3 (RMCP-3) mRNA, partial cds. /PROD=mast cell protease 3	U67888	ENSRNOG00000029240
1388252_PM_at	0.0345109	1.09925	down	LOC685283	hypothetical protein LOC685283	685283	gb:M17960.1 /DB_XREF=gi:204768 /FEA=mRNA /CNT=1 /TID=Rn.964.4 /TIER=ConsEnd /STK=0 /UG=Rn.964 /LL=24483 /UG_GENE=Igf2 /UG_TITLE=Insulin-like growth factor II (somatomedin A) /DEF=Rat insulin-like growth factor II (IGFII) mRNA, 5 flanking region.	M17960	---
1388284_PM_at	0.026523	1.08217	down	---	---	---	gb:AB003753 /DB_XREF=gi:3046870 /FEA=DNA_1 /CNT=1 /TID=Rn.44356.1 /TIER=ConsEnd /STK=0 /UG=Rn.44356 /UG_TITLE=Rattus norvegicus genes for high sulfur protein B2E and high sulfur protein B2F, complete cds /DEF=Rattus norvegicus genes for high sulfur protein B2E and high sulfur protein B2F, complete cds	AB003753	ENSRNOG00000031066
1388289_PM_s_at	0.0229301	1.11044	down	Fshb	follicle stimulating hormone, beta polypeptide	25447	gb:D00577 /DB_XREF=gi:220739 /FEA=DNA /CNT=1 /TID=Rn.22610.1 /TIER=ConsEnd /STK=0 /UG=Rn.22610 /UG_TITLE=Rattus norvegicus gene for FSH beta-subunit, partial cds /DEF=Rattus norvegicus gene for FSH beta-subunit, partial cds	D00577	ENSRNOG00000004898
1388294_PM_at	0.00130956	1.09255	down	Sdhd	succinate dehydrogenase complex, subunit D, integral membrane protein	363061	gb:AI176608 /DB_XREF=gi:3727246 /DB_XREF=EST220197 /CLONE=ROVBU47 /FEA=EST /CNT=112 /TID=Rn.3040.1 /TIER=Stack /STK=75 /UG=Rn.3040 /UG_TITLE=ESTs, Moderately similar to DHSD_HUMAN SUCCINATE DEHYDROGENASE (H.sapiens)	AI176608	ENSRNOG00000022980
1388297_PM_at	0.0143834	1.05126	up	Eef1g	eukaryotic translation elongation factor 1 gamma	293725	gb:BM391203 /DB_XREF=gi:18191256 /DB_XREF=UI-R-DY0-ckq-m-11-0-UI.s1 /CLONE=UI-R-DY0-ckq-m-11-0-UI /FEA=EST /CNT=71 /TID=Rn.1421.1 /TIER=Stack /STK=66 /UG=Rn.1421 /UG_TITLE=ESTs, Highly similar to S22655 translation elongation factor eEF-1 gamma chain (H.sapiens)	BM391203	ENSRNOG00000020075
1388303_PM_at	0.00368879	1.05742	down	Rpl26	ribosomal protein L26	287417	gb:AI598536 /DB_XREF=gi:4607570 /DB_XREF=EST250225 /CLONE=REMDR93 /FEA=EST /CNT=52 /TID=Rn.3934.1 /TIER=Stack /STK=32 /UG=Rn.3934 /UG_TITLE=ESTs, Highly similar to RL26 RAT 60S RIBOSOMAL PROTEIN L26 (R.norvegicus)	AI598536	ENSRNOG00000004214 /// ENSRNOG00000039783/// ENSRNOG00000032777
1388304_PM_at	0.0425588	1.05906	down	Ndufb5	NADH dehydrogenase (ubiquinone) 1 beta subcomplex, 5	294964	gb:BI281307 /DB_XREF=gi:14930906 /DB_XREF=UI-R-DA0-bzh-h-06-0-UI.s1 /CLONE=UI-R-DA0-bzh-h-06-0-UI /FEA=EST /CNT=39 /TID=Rn.3367.1 /TIER=Stack /STK=32 /UG=Rn.3367 /UG_TITLE=ESTs, Moderately similar to NADH-ubiquinone oxidoreductase subunit CI-SGDH (H.sapiens)	BI281307	ENSRNOG00000011949
1388316_PM_at	0.00239987	1.14274	down	RGD1566320	RGD1566320	296207	gb:BG668062 /DB_XREF=gi:13889984 /DB_XREF=DRABUE09 /CLONE=DRABUE09 /FEA=EST /CNT=38 /TID=Rn.4025.1 /TIER=Stack /STK=29 /UG=Rn.4025 /UG_TITLE=ESTs	BG668062	ENSRNOG00000036971
1388340_PM_at	0.00284805	1.10131	down	Ns5atp9	NS5A (hepatitis C virus) transactivated protein 9	300795	gb:BF281153 /DB_XREF=gi:11212307 /DB_XREF=EST445828 /CLONE=RGIAB79 /FEA=EST /CNT=34 /TID=Rn.7233.1 /TIER=Stack /STK=24 /UG=Rn.7233 /UG_TITLE=ESTs, Moderately similar to Y101_HUMAN HYPOTHETICAL PROTEIN KIAA0101 (H.sapiens)	BF281153	ENSRNOG00000016561
1388352_PM_at	0.00208886	1.15072	down	Nat5	N-acetyltransferase 5 (ARD1 homolog, S. cerevisiae)	362228	gb:BI296716 /DB_XREF=gi:14961421 /DB_XREF=UI-R-CV2-cgv-e-04-0-UI.s1 /CLONE=UI-R-CV2-cgv-e-04-0-UI /FEA=EST /CNT=30 /TID=Rn.4306.1 /TIER=Stack /STK=23 /UG=Rn.4306 /UG_TITLE=ESTs, Weakly similar to I38333 ARD1 N-acetyl transferase homolog (H.sapiens)	BI296716	ENSRNOG00000010523
1388389_PM_at	0.016274	1.06895	down	2002-09-01	septin 2	117515	gb:BF282620 /DB_XREF=gi:11213690 /DB_XREF=EST447211 /CLONE=RGIDQ88 /FEA=EST /CNT=38 /TID=Rn.8476.1 /TIER=Stack /STK=20 /UG=Rn.8476 /UG_TITLE=ESTs	BF282620	ENSRNOG00000017952
1388395_PM_at	0.0394428	1.20338	down	G0s2	G0/G1switch 2	289388	gb:AI406939 /DB_XREF=gi:4250443 /DB_XREF=EST235227 /CLONE=ROVDU77 /FEA=EST /CNT=24 /TID=Rn.1040.1 /TIER=Stack /STK=20 /UG=Rn.1040 /UG_TITLE=ESTs, Highly similar to G0S2 MOUSE PUTATIVE LYMPHOCYTE G0G1 SWITCH PROTEIN 2 (M.musculus)	AI406939	ENSRNOG00000006019
1388404_PM_at	0.00395169	1.10886	down	Rpo1-3	RNA polymerase 1-3	360762	gb:AA799724 /DB_XREF=gi:4131432 /DB_XREF=EST189221 /CLONE=RHEAE52 /FEA=EST /CNT=21 /TID=Rn.6228.1 /TIER=Stack /STK=19 /UG=Rn.6228 /UG_TITLE=ESTs, Highly similar to RPA9_MOUSE DNA-DIRECTED RNA POLYMERASE I 16 KDA POLYPEPTIDE (RPA16) (M.musculus)	AA799724	ENSRNOG00000000954
1388414_PM_at	0.0450177	1.06563	down	Ndufs5	NADH dehydrogenase (ubiquinone) Fe-S protein 5	362588	gb:AI410498 /DB_XREF=gi:4254002 /DB_XREF=EST238791 /CLONE=RHECX31 /FEA=EST /CNT=30 /TID=Rn.3392.1 /TIER=Stack /STK=18 /UG=Rn.3392 /UG_TITLE=ESTs, Moderately similar to NIPM_HUMAN NADH-UBIQUINONE OXIDOREDUCTASE 15 KD SUBUNIT (H.sapiens)	AI410498	---
1388446_PM_at	0.0495139	1.03619	up	---	---	---	gb:BF397834 /DB_XREF=gi:11382818 /DB_XREF=UI-R-BS2-bec-b-11-0-UI.s1 /CLONE=UI-R-BS2-bec-b-11-0-UI /FEA=EST /CNT=24 /TID=Rn.2043.1 /TIER=Stack /STK=17 /UG=Rn.2043 /UG_TITLE=ESTs	BF397834	---
1388449_PM_at	0.025347	1.02655	down	Eef1b2	eukaryotic translation elongation factor 1 beta 2	363241	gb:AI175551 /DB_XREF=gi:3726189 /DB_XREF=EST219106 /CLONE=RMUCO87 /FEA=EST /CNT=27 /TID=Rn.3910.1 /TIER=Stack /STK=17 /UG=Rn.3910 /UG_TITLE=ESTs, Highly similar to EF1B_MOUSE Elongation factor 1-beta (EF-1-beta) (M.musculus)	AI175551	ENSRNOG00000024186
1388458_PM_at	0.046901	1.08583	down	Rfc4	replication factor C (activator 1) 4	288003	gb:BI291451 /DB_XREF=gi:14950995 /DB_XREF=UI-R-CV2-cgq-d-07-0-UI.s1 /CLONE=UI-R-CV2-cgq-d-07-0-UI /FEA=EST /CNT=25 /TID=Rn.17046.1 /TIER=Stack /STK=17 /UG=Rn.17046 /UG_TITLE=ESTs, Highly similar to AC12_HUMAN ACTIVATOR 1 37 KD SUBUNIT (H.sapiens)	BI291451	ENSRNOG00000001816
1388474_PM_at	0.0463677	1.0709	up	Ube2i	Ubiquitin-conjugating enzyme E2I	25573	gb:AI104523 /DB_XREF=gi:3708865 /DB_XREF=EST213812 /CLONE=RHECE62 /FEA=EST /CNT=17 /TID=Rn.3776.1 /TIER=Stack /STK=17 /UG=Rn.3776 /UG_TITLE=ESTs	AI104523	---
1388484_PM_at	0.0386379	1.05734	down	Ube2c	ubiquitin-conjugating enzyme E2C	296368	gb:BI296084 /DB_XREF=gi:14960172 /DB_XREF=UI-R-DK0-cew-b-08-0-UI.s1 /CLONE=UI-R-DK0-cew-b-08-0-UI /FEA=EST /CNT=22 /TID=Rn.3102.1 /TIER=Stack /STK=16 /UG=Rn.3102 /UG_TITLE=ESTs, Weakly similar to ubiquitin conjugating enzyme (Rattus norvegicus) (R.norvegicus)	BI296084	---
1388488_PM_at	0.011248	1.11754	down	Lsm3	LSM3 homolog, U6 small nuclear RNA associated (S. cerevisiae)	297455	gb:AA943742 /DB_XREF=gi:3103658 /DB_XREF=EST199241 /CLONE=RBRAP11 /FEA=EST /CNT=22 /TID=Rn.4333.1 /TIER=Stack /STK=16 /UG=Rn.4333 /UG_TITLE=ESTs, Highly similar to RIKEN cDNA 1010001J12 (Mus musculus) (M.musculus)	AA943742	ENSRNOG00000008733
1388497_PM_at	0.0411974	1.11516	down	Them2	thioesterase superfamily member 2	291135	gb:AI411426 /DB_XREF=gi:4254930 /DB_XREF=EST239720 /CLONE=RKIES47 /FEA=EST /CNT=21 /TID=Rn.1730.1 /TIER=Stack /STK=16 /UG=Rn.1730 /UG_TITLE=ESTs, Weakly similar to S44652 f42h10.6 protein - Caenorhabditis elegans (C.elegans)	AI411426	ENSRNOG00000018415
1388498_PM_at	0.0487575	1.12458	down	Ccnk	cyclin K	500715	gb:BF284014 /DB_XREF=gi:11215084 /DB_XREF=EST448605 /CLONE=RGIEJ93 /FEA=EST /CNT=20 /TID=Rn.23.1 /TIER=Stack /STK=16 /UG=Rn.23 /UG_TITLE=ESTs	BF284014	---
1388511_PM_at	0.00554049	1.19419	down	Centd2	centaurin, delta 2	361617	gb:AI412079 /DB_XREF=gi:4255583 /DB_XREF=EST240373 /CLONE=RKIEH43 /FEA=EST /CNT=17 /TID=Rn.41376.1 /TIER=Stack /STK=16 /UG=Rn.41376 /UG_TITLE=ESTs, Weakly similar to T00342 hypothetical protein KIAA0580 (H.sapiens)	AI412079	ENSRNOG00000019555
1388523_PM_at	0.0243038	1.10943	down	Txndc12	thioredoxin domain containing 12 (endoplasmic reticulum)	298370	gb:BM392352 /DB_XREF=gi:18192405 /DB_XREF=UI-R-DO1-ckp-n-02-0-UI.s1 /CLONE=UI-R-DO1-ckp-n-02-0-UI /FEA=EST /CNT=19 /TID=Rn.5953.1 /TIER=Stack /STK=15 /UG=Rn.5953 /UG_TITLE=ESTs	BM392352	ENSRNOG00000008090
1388534_PM_at	0.0155332	1.09425	down	---	---	---	gb:AA851369 /DB_XREF=gi:2938909 /DB_XREF=EST194137 /CLONE=RPLAF77 /FEA=EST /CNT=16 /TID=Rn.1322.1 /TIER=Stack /STK=15 /UG=Rn.1322 /UG_TITLE=ESTs	AA851369	---
1388538_PM_at	0.0123101	1.10143	down	Rbx1	ring-box 1	300084	gb:AI179646 /DB_XREF=gi:4135181 /DB_XREF=EST223370 /CLONE=RSPCJ96 /FEA=EST /CNT=16 /TID=Rn.65533.1 /TIER=Stack /STK=15 /UG=Rn.65533 /UG_TITLE=ESTs	AI179646	---
1388548_PM_at	0.0197602	1.12086	up	Fam126b	family with sequence similarity 126, member B	316415	gb:BI291421 /DB_XREF=gi:14950943 /DB_XREF=UI-R-CV2-cgq-a-11-0-UI.s1 /CLONE=UI-R-CV2-cgq-a-11-0-UI /FEA=EST /CNT=15 /TID=Rn.79914.1 /TIER=Stack /STK=15 /UG=Rn.79914 /UG_TITLE=ESTs, Weakly similar to D1069.3.p (Caenorhabditis elegans) (C.elegans)	BI291421	ENSRNOG00000025079
1388549_PM_at	0.0257532	1.06185	down	Ncoa4	nuclear receptor coactivator 4	619385	gb:AI228248 /DB_XREF=gi:3812135 /DB_XREF=EST224943 /CLONE=RBRCS39 /FEA=EST /CNT=24 /TID=Rn.7633.1 /TIER=Stack /STK=14 /UG=Rn.7633 /UG_TITLE=ESTs	AI228248	---
1388555_PM_at	0.00214514	1.09458	down	Txndc17	thioredoxin domain containing 17	287474	gb:AI104292 /DB_XREF=gi:3708667 /DB_XREF=EST213581 /CLONE=RHEBZ85 /FEA=EST /CNT=24 /TID=Rn.22457.1 /TIER=Stack /STK=14 /UG=Rn.22457 /UG_TITLE=ESTs	AI104292	ENSRNOG00000014072
1388557_PM_at	0.0265244	1.1029	down	Tubb2c///C7	complement component 7 /// tubulin, beta 2c	296554///117517	gb:BF284922 /DB_XREF=gi:11215992 /DB_XREF=EST449513 /CLONE=RGIEX76 /FEA=EST /CNT=20 /TID=Rn.33787.1 /TIER=Stack /STK=14 /UG=Rn.33787 /UG_TITLE=ESTs	BF284922	---
1388578_PM_at	0.045782	1.15112	down	LOC289378	similar to B0432.8	289378	gb:BI288621 /DB_XREF=gi:14945387 /DB_XREF=UI-R-DK0-cdd-a-06-0-UI.s1 /CLONE=UI-R-DK0-cdd-a-06-0-UI /FEA=EST /CNT=17 /TID=Rn.12992.1 /TIER=Stack /STK=14 /UG=Rn.12992 /UG_TITLE=ESTs, Weakly similar to B0432.8.p (Caenorhabditis elegans) (C.elegans)	BI288621	---
1388616_PM_at	0.0118742	1.08081	down	MGC72955	similar to RIKEN cDNA 2310042G06	494346	gb:AI233746 /DB_XREF=gi:4135910 /DB_XREF=EST230434 /CLONE=RKIDJ56 /FEA=EST /CNT=20 /TID=Rn.3457.1 /TIER=Stack /STK=13 /UG=Rn.3457 /UG_TITLE=ESTs, Weakly similar to SC14_HUMAN SEC14-LIKE PROTEIN (H.sapiens)	AI233746	---
1388621_PM_at	0.0138965	1.15916	down	Med11	mediator complex subunit 11	287456	gb:BG378803 /DB_XREF=gi:13303275 /DB_XREF=UI-R-CV1-bvt-a-06-0-UI.s1 /CLONE=UI-R-CV1-bvt-a-06-0-UI /FEA=EST /CNT=16 /TID=Rn.19345.1 /TIER=Stack /STK=13 /UG=Rn.19345 /UG_TITLE=ESTs	BG378803	ENSRNOG00000019384
1388660_PM_at	0.0043063	1.08969	down	Mcts1	malignant T cell amplified sequence 1	302500	gb:BI295915 /DB_XREF=gi:14959838 /DB_XREF=UI-R-DK0-cfc-c-04-0-UI.s1 /CLONE=UI-R-DK0-cfc-c-04-0-UI /FEA=EST /CNT=14 /TID=Rn.36129.1 /TIER=Stack /STK=13 /UG=Rn.36129 /UG_TITLE=ESTs, Weakly similar to C11D2.4.p (Caenorhabditis elegans) (C.elegans)	BI295915	---
1388666_PM_at	0.00118562	1.16703	up	Enc1	ectodermal-neural cortex 1	294674	gb:AI179988 /DB_XREF=gi:3730626 /DB_XREF=EST223719 /CLONE=RSPCO55 /FEA=EST /CNT=14 /TID=Rn.3039.1 /TIER=Stack /STK=13 /UG=Rn.3039 /UG_TITLE=ESTs	AI179988	---
1388668_PM_at	0.00689177	1.11382	down	---	---	---	gb:BM384972 /DB_XREF=gi:18185025 /DB_XREF=UI-R-CN1-cjl-p-02-0-UI.s2 /CLONE=UI-R-CN1-cjl-p-02-0-UI /FEA=EST /CNT=13 /TID=Rn.878.1 /TIER=Stack /STK=13 /UG=Rn.878 /UG_TITLE=ESTs	BM384972	---
1388681_PM_at	0.0129244	1.07119	down	Sar1b	SAR1 homolog B (S. cerevisiae)	287276	gb:AI105294 /DB_XREF=gi:3709410 /DB_XREF=EST214583 /CLONE=RKIBI45 /FEA=EST /CNT=27 /TID=Rn.36748.1 /TIER=Stack /STK=12 /UG=Rn.36748 /UG_TITLE=ESTs, Weakly similar to ARF6_HUMAN ADP-RIBOSYLATION FACTOR 6 (R.norvegicus)	AI105294	ENSRNOG00000004820
1388709_PM_at	0.0305583	1.30552	down	Wdr43	WD repeat domain 43	362703	gb:BF284695 /DB_XREF=gi:11215765 /DB_XREF=EST449286 /CLONE=RGIEV06 /FEA=EST /CNT=16 /TID=Rn.7873.1 /TIER=Stack /STK=12 /UG=Rn.7873 /UG_TITLE=ESTs	BF284695	ENSRNOG00000026316
1388720_PM_at	0.0263578	1.10801	down	---	---	---	gb:BM390713 /DB_XREF=gi:18190766 /DB_XREF=UI-R-CN1-cjr-d-17-0-UI.s1 /CLONE=UI-R-CN1-cjr-d-17-0-UI /FEA=EST /CNT=14 /TID=Rn.1130.1 /TIER=Stack /STK=12 /UG=Rn.1130 /UG_TITLE=ESTs	BM390713	---
1388732_PM_at	0.0262372	1.05763	down	Slc35f5	solute carrier family 35, member F5	288993	gb:AI009820 /DB_XREF=gi:4133123 /DB_XREF=EST204271 /CLONE=RLUBO85 /FEA=EST /CNT=14 /TID=Rn.17967.1 /TIER=Stack /STK=12 /UG=Rn.17967 /UG_TITLE=ESTs	AI009820	ENSRNOG00000003403
1388738_PM_at	0.0414884	1.14035	up	Atrnl1	attractin like 1	307992	gb:AI411227 /DB_XREF=gi:4254731 /DB_XREF=EST239521 /CLONE=RKIER68 /FEA=EST /CNT=12 /TID=Rn.12950.1 /TIER=Stack /STK=12 /UG=Rn.12950 /UG_TITLE=ESTs	AI411227	---
1388754_PM_at	0.0373325	1.16488	down	---	---	---	gb:AI176839 /DB_XREF=gi:3727477 /DB_XREF=EST220441 /CLONE=ROVBX55 /FEA=EST /CNT=18 /TID=Rn.8529.1 /TIER=Stack /STK=11 /UG=Rn.8529 /UG_TITLE=ESTs	AI176839	---
1388779_PM_at	0.0178559	1.10083	up	Zfp180	zinc finger protein 180	246279	gb:BG381516 /DB_XREF=gi:13305988 /DB_XREF=UI-R-CT0-buk-c-02-0-UI.s1 /CLONE=UI-R-CT0-buk-c-02-0-UI /FEA=EST /CNT=15 /TID=Rn.14669.1 /TIER=Stack /STK=11 /UG=Rn.14669 /UG_TITLE=ESTs	BG381516	---
1388780_PM_at	0.0260833	1.08124	up	Terf2ip	telomeric repeat binding factor 2, interacting protein	307861	gb:BF395792 /DB_XREF=gi:11380763 /DB_XREF=UI-R-BT1-bkc-d-02-0-UI.s1 /CLONE=UI-R-BT1-bkc-d-02-0-UI /FEA=EST /CNT=19 /TID=Rn.2055.1 /TIER=Stack /STK=11 /UG=Rn.2055 /UG_TITLE=ESTs	BF395792	ENSRNOG00000010712
1388804_PM_at	5.1629e-06	1.1355	up	---	---	---	gb:BI300986 /DB_XREF=gi:14977266 /DB_XREF=UI-R-DK0-cfk-e-04-0-UI.s2 /CLONE=UI-R-DK0-cfk-e-04-0-UI /FEA=EST /CNT=14 /TID=Rn.16035.1 /TIER=Stack /STK=11 /UG=Rn.16035 /UG_TITLE=ESTs	BI300986	---
1388810_PM_at	0.0347699	1.12805	down	Abce1	ATP-binding cassette, sub-family E (OABP), member 1	361390	gb:BI278966 /DB_XREF=gi:14926327 /DB_XREF=UI-R-DB0-byt-c-09-0-UI.s1 /CLONE=UI-R-DB0-byt-c-09-0-UI /FEA=EST /CNT=13 /TID=Rn.2961.1 /TIER=Stack /STK=11 /UG=Rn.2961 /UG_TITLE=ESTs	BI278966	ENSRNOG00000018345
1388821_PM_at	0.0406662	1.06827	up	Trib2	tribbles homolog 2 (Drosophila)	313974	gb:AI010430 /DB_XREF=gi:4133252 /DB_XREF=EST204881 /CLONE=RLUBZ38 /FEA=EST /CNT=14 /TID=Rn.17572.1 /TIER=Stack /STK=11 /UG=Rn.17572 /UG_TITLE=ESTs	AI010430	ENSRNOG00000004110
1388833_PM_at	0.0092847	1.23083	down	Pole3	polymerase (DNA directed), epsilon 3 (p17 subunit)	298098	gb:AA892270 /DB_XREF=gi:3019149 /DB_XREF=EST196073 /CLONE=RKIAO44 /FEA=EST /CNT=12 /TID=Rn.3290.1 /TIER=Stack /STK=11 /UG=Rn.3290 /UG_TITLE=ESTs	AA892270	ENSRNOG00000015392
1388842_PM_at	0.0134807	1.09461	down	Srf	serum response factor (c-fos serum response element-binding transcription factor)	501099	gb:BG380385 /DB_XREF=gi:13304857 /DB_XREF=UI-R-CT0-btw-e-10-0-UI.s1 /CLONE=UI-R-CT0-btw-e-10-0-UI /FEA=EST /CNT=11 /TID=Rn.1501.1 /TIER=Stack /STK=11 /UG=Rn.1501 /UG_TITLE=ESTs	BG380385	ENSRNOG00000018232
1388843_PM_at	0.0336635	1.1964	down	---	---	---	gb:BI296771 /DB_XREF=gi:14961530 /DB_XREF=UI-R-DK0-cfz-b-04-0-UI.s1 /CLONE=UI-R-DK0-cfz-b-04-0-UI /FEA=EST /CNT=11 /TID=Rn.34554.1 /TIER=Stack /STK=11 /UG=Rn.34554 /UG_TITLE=ESTs	BI296771	---
1388860_PM_at	0.0461	1.08118	down	Mrpl22	mitochondrial ribosomal protein L22	287302	gb:AI175327 /DB_XREF=gi:3725965 /DB_XREF=EST218867 /CLONE=RMUCM04 /FEA=EST /CNT=23 /TID=Rn.13421.1 /TIER=Stack /STK=10 /UG=Rn.13421 /UG_TITLE=ESTs, Weakly similar to Y39A1A.6.p (Caenorhabditis elegans) (C.elegans)	AI175327	ENSRNOG00000027039
1388869_PM_at	0.0288856	1.13937	down	Tbce	tubulin folding cofactor E	361255	gb:BF281319 /DB_XREF=gi:11212389 /DB_XREF=EST445910 /CLONE=RGIAD19 /FEA=EST /CNT=15 /TID=Rn.3547.1 /TIER=Stack /STK=10 /UG=Rn.3547 /UG_TITLE=ESTs, Weakly similar to K07H8.1.p (Caenorhabditis elegans) (C.elegans)	BF281319	ENSRNOG00000029667
1388871_PM_at	0.0372089	1.04892	down	Ash2l	ash2 (absent, small, or homeotic)-like (Drosophila)	290829	gb:BG378089 /DB_XREF=gi:13302561 /DB_XREF=UI-R-CT0-bvn-g-07-0-UI.s1 /CLONE=UI-R-CT0-bvn-g-07-0-UI /FEA=EST /CNT=15 /TID=Rn.18018.1 /TIER=Stack /STK=10 /UG=Rn.18018 /UG_TITLE=ESTs, Weakly similar to S72249 trithorax protein ash2 - fruit fly (D.melanogaster)	BG378089	ENSRNOG00000014875
1388877_PM_at	0.0428393	1.1818	down	Mrps5	mitochondrial ribosomal protein S5	296134	gb:BM386940 /DB_XREF=gi:18186993 /DB_XREF=UI-R-CN1-cjh-p-22-0-UI.s1 /CLONE=UI-R-CN1-cjh-p-22-0-UI /FEA=EST /CNT=16 /TID=Rn.9035.1 /TIER=Stack /STK=10 /UG=Rn.9035 /UG_TITLE=ESTs, Weakly similar to T20412 hypothetical protein E02A10.1 - Caenorhabditis elegans (C.elegans)	BM386940	ENSRNOG00000015192
1388883_PM_at	0.0174046	1.22272	down	Pold4	polymerase (DNA-directed), delta 4	361698	gb:BF281976 /DB_XREF=gi:11213046 /DB_XREF=EST446567 /CLONE=RGIDA28 /FEA=EST /CNT=14 /TID=Rn.13249.1 /TIER=Stack /STK=10 /UG=Rn.13249 /UG_TITLE=ESTs	BF281976	ENSRNOG00000018765
1388887_PM_at	0.0211638	1.12078	down	Ggta1	glycoprotein, alpha-galactosyltransferase 1	246766	gb:AI178222 /DB_XREF=gi:3728860 /DB_XREF=EST221887 /CLONE=RPLCN70 /FEA=EST /CNT=17 /TID=Rn.916.1 /TIER=Stack /STK=10 /UG=Rn.916 /UG_TITLE=ESTs	AI178222	---
1388892_PM_at	0.00475523	1.10487	up	Rab2b	RAB2B, member RAS oncogene family	305853	gb:BF395178 /DB_XREF=gi:11380143 /DB_XREF=UI-R-CM0-bjj-g-08-0-UI.s1 /CLONE=UI-R-CM0-bjj-g-08-0-UI /FEA=EST /CNT=14 /TID=Rn.22338.1 /TIER=Stack /STK=10 /UG=Rn.22338 /UG_TITLE=ESTs, Weakly similar to RAB2 RAT RAS-RELATED PROTEIN RAB-2 (R.norvegicus)	BF395178	ENSRNOG00000012488
1388908_PM_at	0.0445526	1.12585	down	Peci	peroxisomal D3,D2-enoyl-CoA isomerase	291075	gb:BI278268 /DB_XREF=gi:14924946 /DB_XREF=UI-R-CY0-bxr-d-10-0-UI.s1 /CLONE=UI-R-CY0-bxr-d-10-0-UI /FEA=EST /CNT=14 /TID=Rn.3194.2 /TIER=Stack /STK=10 /UG=Rn.3194 /UG_TITLE=ESTs, Weakly similar to F Chain F, 2-Enoyl-Coa Hydratase, Data Collected At 100 K, Ph 6.5 (R.norvegicus)	BI278268	ENSRNOG00000016369
1388911_PM_at	0.0083433	1.11446	down	Prim2	primase, DNA, polypeptide 2	301323	gb:AI177134 /DB_XREF=gi:3727772 /DB_XREF=EST220741 /CLONE=ROVCB31 /FEA=EST /CNT=13 /TID=Rn.11846.1 /TIER=Stack /STK=10 /UG=Rn.11846 /UG_TITLE=ESTs, Highly similar to DNA PRIMASE LARGE SUBUNIT (M.musculus)	AI177134	ENSRNOG00000012486
1388923_PM_at	0.00614666	1.16154	down	Ny-sar-48	sarcoma antigen NY-SAR-48	290626	gb:BG381657 /DB_XREF=gi:13306129 /DB_XREF=UI-R-CT0-bud-h-04-0-UI.s1 /CLONE=UI-R-CT0-bud-h-04-0-UI /FEA=EST /CNT=12 /TID=Rn.29942.1 /TIER=Stack /STK=10 /UG=Rn.29942 /UG_TITLE=ESTs	BG381657	ENSRNOG00000023534
1388931_PM_at	0.00314476	1.08781	down	Mrpl13	mitochondrial ribosomal protein L13	299938	gb:AA799440 /DB_XREF=gi:2862395 /DB_XREF=EST188937 /CLONE=RHEAB09 /FEA=EST /CNT=13 /TID=Rn.6185.1 /TIER=Stack /STK=10 /UG=Rn.6185 /UG_TITLE=ESTs, Weakly similar to T20858 hypothetical protein F13G3.7 - Caenorhabditis elegans (C.elegans)	AA799440	ENSRNOG00000004401
1388943_PM_at	0.004278	1.24647	down	Chrac1	chromatin accessibility complex 1	315058	gb:BI279670 /DB_XREF=gi:14927706 /DB_XREF=UI-R-DE0-caf-c-10-0-UI.s1 /CLONE=UI-R-DE0-caf-c-10-0-UI /FEA=EST /CNT=11 /TID=Rn.17653.1 /TIER=Stack /STK=10 /UG=Rn.17653 /UG_TITLE=ESTs	BI279670	ENSRNOG00000009103
1388953_PM_at	0.0074532	1.12314	down	Gnl3	guanine nucleotide binding protein-like 3 (nucleolar)	290556	gb:AA892598 /DB_XREF=gi:4132181 /DB_XREF=EST196401 /CLONE=RKIAU41 /FEA=EST /CNT=10 /TID=Rn.4110.1 /TIER=Stack /STK=10 /UG=Rn.4110 /UG_TITLE=ESTs	AA892598	ENSRNOG00000028461
1388958_PM_a_at	0.043963	1.17691	down	Slc2a4	solute carrier family 2 (facilitated glucose transporter), member 4	25139	gb:AA799760 /DB_XREF=gi:2862715 /DB_XREF=EST189257 /CLONE=RHEAF03 /FEA=EST /CNT=10 /TID=Rn.1314.2 /TIER=Stack /STK=10 /UG=Rn.1314 /LL=25139 /UG_GENE=Glut4 /UG_TITLE=solute carrier family 2 (facilitated glucose transporter), member 4	AA799760	ENSRNOG00000017226
1388974_PM_at	0.0220618	1.10801	down	Srp19	signal recognition particle 19	291685	gb:AI101527 /DB_XREF=gi:4134013 /DB_XREF=EST210816 /CLONE=RBRBR71 /FEA=EST /CNT=26 /TID=Rn.240.1 /TIER=Stack /STK=9 /UG=Rn.240 /UG_TITLE=ESTs, Highly similar to S01700 signal recognition particle 19K protein (H.sapiens)	AI101527	ENSRNOG00000020204
1388981_PM_at	0.00161141	1.14472	up	LOC503165	similar to ADP-ribosylation factor GTPase-activating protein 3 (ARF GAP 3)	503165	gb:AI104127 /DB_XREF=gi:3708533 /DB_XREF=EST213416 /CLONE=RHEBX60 /FEA=EST /CNT=17 /TID=Rn.12928.1 /TIER=Stack /STK=9 /UG=Rn.12928 /UG_TITLE=ESTs	AI104127	---
1388990_PM_at	0.000258761	1.13622	down	Mki67ip	Mki67 (FHA domain) interacting nucleolar phosphoprotein	246042	gb:AA924622 /DB_XREF=gi:4235813 /DB_XREF=UI-R-A1-ea-h-11-0-UI.s1 /CLONE=UI-R-A1-ea-h-11-0-UI /FEA=EST /CNT=16 /TID=Rn.20901.1 /TIER=Stack /STK=9 /UG=Rn.20901 /UG_TITLE=ESTs	AA924622	ENSRNOG00000025701
1389011_PM_at	0.0342717	1.08502	down	Nsmce2	non-SMC element 2, MMS21 homolog (S. cerevisiae)	299957	gb:BG374333 /DB_XREF=gi:13298805 /DB_XREF=UI-R-CV1-bso-b-05-0-UI.s1 /CLONE=UI-R-CV1-bso-b-05-0-UI /FEA=EST /CNT=13 /TID=Rn.13480.1 /TIER=Stack /STK=9 /UG=Rn.13480 /UG_TITLE=ESTs	BG374333	ENSRNOG00000003964
1389025_PM_at	0.0113976	1.12292	down	Taf11	TAF11 RNA polymerase II, TATA box binding protein (TBP)-associated factor	309638	gb:BI278688 /DB_XREF=gi:14925784 /DB_XREF=UI-R-DB0-bza-f-06-0-UI.s1 /CLONE=UI-R-DB0-bza-f-06-0-UI /FEA=EST /CNT=12 /TID=Rn.11920.1 /TIER=Stack /STK=9 /UG=Rn.11920 /UG_TITLE=ESTs, Highly similar to 2204193A TFIIB:SUBUNIT=p30beta (H.sapiens)	BI278688	ENSRNOG00000024601
1389027_PM_at	0.0265652	1.11838	up	Lman2l	lectin, mannose-binding 2-like	301343	gb:BF284714 /DB_XREF=gi:11215784 /DB_XREF=EST449305 /CLONE=RGIEV29 /FEA=EST /CNT=12 /TID=Rn.37631.1 /TIER=Stack /STK=9 /UG=Rn.37631 /UG_TITLE=ESTs, Weakly similar to G01447 GP36b glycoprotein (H.sapiens)	BF284714	---
1389057_PM_at	0.0380155	1.0869	down	Arv1	ARV1 homolog (S. cerevisiae)	292097	gb:AI007774 /DB_XREF=gi:3221606 /DB_XREF=EST202225 /CLONE=RBRAU47 /FEA=EST /CNT=10 /TID=Rn.2761.1 /TIER=Stack /STK=9 /UG=Rn.2761 /UG_TITLE=ESTs, Moderately similar to T34534 hypothetical protein DKFZp434E0517.1 (H.sapiens)	AI007774	ENSRNOG00000018909
1389060_PM_at	0.0055733	1.14866	up	---	---	---	gb:BI297313 /DB_XREF=gi:14962570 /DB_XREF=UI-R-CV2-cgx-a-01-0-UI.s1 /CLONE=UI-R-CV2-cgx-a-01-0-UI /FEA=EST /CNT=10 /TID=Rn.34660.1 /TIER=Stack /STK=9 /UG=Rn.34660 /UG_TITLE=ESTs	BI297313	---
1389065_PM_at	0.0303054	1.16403	down	Rbm34	RNA binding motif protein 34	307956	gb:BM392304 /DB_XREF=gi:18192357 /DB_XREF=UI-R-DO1-ckp-d-16-0-UI.s1 /CLONE=UI-R-DO1-ckp-d-16-0-UI /FEA=EST /CNT=10 /TID=Rn.7057.1 /TIER=Stack /STK=9 /UG=Rn.7057 /UG_TITLE=ESTs	BM392304	ENSRNOG00000020004
1389082_PM_at	0.0181731	1.22217	up	---	---	---	gb:BF398612 /DB_XREF=gi:11383607 /DB_XREF=UI-R-BS2-beq-h-02-0-UI.s1 /CLONE=UI-R-BS2-beq-h-02-0-UI /FEA=EST /CNT=12 /TID=Rn.11558.1 /TIER=Stack /STK=9 /UG=Rn.11558 /UG_TITLE=ESTs	BF398612	---
1389083_PM_at	0.0355704	1.11231	down	Smek2	SMEK homolog 2, suppressor of mek1 (Dictyostelium)	360993	gb:AI411510 /DB_XREF=gi:4255014 /DB_XREF=EST239804 /CLONE=RKIEN07 /FEA=EST /CNT=11 /TID=Rn.12474.1 /TIER=Stack /STK=9 /UG=Rn.12474 /UG_TITLE=ESTs	AI411510	---
1389103_PM_at	0.0188665	1.12245	down	Gins4	GINS complex subunit 4 (Sld5 homolog)	290842	gb:BM391005 /DB_XREF=gi:18191058 /DB_XREF=UI-R-CN1-cjm-k-15-0-UI.s1 /CLONE=UI-R-CN1-cjm-k-15-0-UI /FEA=EST /CNT=9 /TID=Rn.9398.1 /TIER=Stack /STK=9 /UG=Rn.9398 /UG_TITLE=ESTs	BM391005	ENSRNOG00000018040
1389104_PM_s_at	0.032711	1.33924	up	Prdm2	PR domain containing 2, with ZNF domain	313678	gb:BF388420 /DB_XREF=gi:11373244 /DB_XREF=UI-R-BS2-bdc-c-06-0-UI.s1 /CLONE=UI-R-BS2-bdc-c-06-0-UI /FEA=EST /CNT=9 /TID=Rn.20396.1 /TIER=Stack /STK=9 /UG=Rn.20396 /UG_TITLE=ESTs	BF388420	---
1389116_PM_at	0.0124103	1.18598	up	Mtmr9	myotubularin related protein 9	282584	gb:BE111884 /DB_XREF=gi:8503989 /DB_XREF=UI-R-BS1-azu-b-04-0-UI.s1 /CLONE=UI-R-BS1-azu-b-04-0-UI /FEA=EST /CNT=9 /TID=Rn.20978.1 /TIER=Stack /STK=9 /UG=Rn.20978 /UG_TITLE=ESTs, Highly similar to MTR3_MOUSE MYOTUBULARIN-RELATED PROTEIN 3 (M.musculus)	BE111884	ENSRNOG00000011560
1389117_PM_at	0.0148478	1.10643	down	Osgep	O-sialoglycoprotein endopeptidase	290028	gb:AW532161 /DB_XREF=gi:7174575 /DB_XREF=UI-R-C4-alj-b-01-0-UI.s1 /CLONE=UI-R-C4-alj-b-01-0-UI /FEA=EST /CNT=9 /TID=Rn.27608.1 /TIER=Stack /STK=9 /UG=Rn.27608 /UG_TITLE=ESTs, Weakly similar to S38110 O-sialoglycoprotein endopeptidase homolog YKR038c - yeast (Saccharomyces cerevisiae) (S.cerevisiae)	AW532161	ENSRNOG00000009333
1389125_PM_at	0.00279273	1.1646	down	Mrpl1	mitochondrial ribosomal protein L1	289491	gb:BI293704 /DB_XREF=gi:14955455 /DB_XREF=UI-R-DK0-cdu-g-01-0-UI.s1 /CLONE=UI-R-DK0-cdu-g-01-0-UI /FEA=EST /CNT=25 /TID=Rn.3033.1 /TIER=Stack /STK=8 /UG=Rn.3033 /UG_TITLE=ESTs, Weakly similar to T32555 hypothetical protein F33D4.5 - Caenorhabditis elegans (C.elegans)	BI293704	ENSRNOG00000002070
1389126_PM_at	0.000729291	1.13064	down	Chchd1	coiled-coil-helix-coiled-coil-helix domain containing 1	361005	gb:BG373580 /DB_XREF=gi:13270117 /DB_XREF=UI-R-CV1-bse-e-02-0-UI.s1 /CLONE=UI-R-CV1-bse-e-02-0-UI /FEA=EST /CNT=17 /TID=Rn.2620.1 /TIER=Stack /STK=8 /UG=Rn.2620 /UG_TITLE=ESTs	BG373580	ENSRNOG00000009297
1389131_PM_at	0.0328209	1.14548	down	Nt5c3l	5'-nucleotidase, cytosolic III-like	360629	gb:BF412799 /DB_XREF=gi:11400788 /DB_XREF=UI-R-BT1-bnz-e-07-0-UI.s1 /CLONE=UI-R-BT1-bnz-e-07-0-UI /FEA=EST /CNT=16 /TID=Rn.24114.1 /TIER=Stack /STK=8 /UG=Rn.24114 /UG_TITLE=ESTs, Weakly similar to YQT3_CAEEL HYPOTHETICAL 42.0 KD PROTEIN F25B5.3 IN CHROMOSOME III (C.elegans)	BF412799	---
1389132_PM_at	0.0257481	1.10885	up	Hip1	huntingtin interacting protein 1	192154	gb:AW253339 /DB_XREF=gi:6596930 /DB_XREF=UI-R-BJ0-adz-g-03-0-UI.s1 /CLONE=UI-R-BJ0-adz-g-03-0-UI /FEA=EST /CNT=15 /TID=Rn.11882.1 /TIER=Stack /STK=8 /UG=Rn.11882 /UG_TITLE=ESTs	AW253339	---
1389136_PM_at	0.0246968	1.07252	down	Prkrir	protein-kinase, interferon-inducible double stranded RNA dependent inhibitor, repressor of (P58 repressor)	308845	gb:AI406280 /DB_XREF=gi:4249784 /DB_XREF=EST234566 /CLONE=RBRDL86 /FEA=EST /CNT=21 /TID=Rn.6691.1 /TIER=Stack /STK=8 /UG=Rn.6691 /UG_TITLE=ESTs, Highly similar to P52K_HUMAN 52 KDA REPRESSOR OF THE INHIBITOR OF THE PROTEIN KINASE (P58IPK-INTERACTING PROTEIN) (58 KDA INTERFERON-INDUCED PROTEIN KINASE-INTERACTING PROTEIN) (P52RIPK) (DEATH ASSOCIATED PROTEIN 4) (H.sapiens)	AI406280	---
1389148_PM_at	0.0137127	1.12666	down	Apool	apolipoprotein O-like	317191	gb:AW254686 /DB_XREF=gi:6598277 /DB_XREF=UI-R-BJ0-adu-e-09-0-UI.s1 /CLONE=UI-R-BJ0-adu-e-09-0-UI /FEA=EST /CNT=14 /TID=Rn.33695.1 /TIER=Stack /STK=8 /UG=Rn.33695 /UG_TITLE=ESTs	AW254686	ENSRNOG00000004512
1389154_PM_at	0.0113085	1.15027	down	Lias	lipoic acid synthetase	305348	gb:AW524453 /DB_XREF=gi:7166838 /DB_XREF=UI-R-BO0-ahx-f-02-0-UI.s1 /CLONE=UI-R-BO0-ahx-f-02-0-UI /FEA=EST /CNT=13 /TID=Rn.25547.1 /TIER=Stack /STK=8 /UG=Rn.25547 /UG_TITLE=ESTs, Weakly similar to T23655 hypothetical protein M01F1.3 - Caenorhabditis elegans (C.elegans)	AW524453	ENSRNOG00000002759
1389160_PM_at	0.0112137	1.14206	down	Eraf	erythroid associated factor	293522	gb:AI230287 /DB_XREF=gi:3814174 /DB_XREF=EST226982 /CLONE=REMCU62 /FEA=EST /CNT=12 /TID=Rn.12724.1 /TIER=Stack /STK=8 /UG=Rn.12724 /UG_TITLE=ESTs	AI230287	---
1389165_PM_at	0.0450837	1.09412	up	Wdr26	WD repeat domain 26	498301	gb:AI178292 /DB_XREF=gi:3728930 /DB_XREF=EST221960 /CLONE=RPLCO60 /FEA=EST /CNT=14 /TID=Rn.2530.1 /TIER=Stack /STK=8 /UG=Rn.2530 /UG_TITLE=ESTs, Weakly similar to COPP RAT COATOMER BETA SUBUNIT (R.norvegicus)	AI178292	---
1389168_PM_at	0.00464676	1.14925	down	Mkks	McKusick-Kaufman syndrome	311456	gb:AI412239 /DB_XREF=gi:4255743 /DB_XREF=EST240534 /CLONE=RKIEK86 /FEA=EST /CNT=13 /TID=Rn.8839.1 /TIER=Stack /STK=8 /UG=Rn.8839 /UG_TITLE=ESTs	AI412239	ENSRNOG00000006705
1389182_PM_at	0.0363749	1.13579	down	RGD1311269	similar to hypothetical protein FLJ37953	301419	gb:AI603132 /DB_XREF=gi:4612293 /DB_XREF=UI-R-AE0-xg-c-10-0-UI.s1 /CLONE=UI-R-AE0-xg-c-10-0-UI /FEA=EST /CNT=10 /TID=Rn.14569.1 /TIER=Stack /STK=8 /UG=Rn.14569 /UG_TITLE=ESTs, Weakly similar to T50633 hypothetical protein DKFZp762F1811.1 (H.sapiens)	AI603132	ENSRNOG00000010100
1389184_PM_at	0.0281411	1.10468	down	Rpp30	ribonuclease P/MRP 30 subunit (human)	685332	gb:AA818914 /DB_XREF=gi:4227586 /DB_XREF=UI-R-A0-as-b-01-0-UI.s1 /CLONE=UI-R-A0-as-b-01-0-UI /FEA=EST /CNT=10 /TID=Rn.17421.1 /TIER=Stack /STK=8 /UG=Rn.17421 /UG_TITLE=ESTs, Highly similar to RP30_MOUSE Ribonuclease P protein subunit p30 (RNaseP protein p30) (RNase P subunit 2) (M.musculus)	AA818914	ENSRNOG00000018718
1389201_PM_at	0.00194064	1.15933	up	rCG_22919	hypothetical protein LOC100125364	100125364	gb:BG373545 /DB_XREF=gi:13270082 /DB_XREF=UI-R-CV1-bse-a-11-0-UI.s1 /CLONE=UI-R-CV1-bse-a-11-0-UI /FEA=EST /CNT=19 /TID=Rn.39306.1 /TIER=Stack /STK=8 /UG=Rn.39306 /UG_TITLE=ESTs, Weakly similar to REQN RAT ZINC-FINGER PROTEIN NEURO-D4 (R.norvegicus)	BG373545	ENSRNOG00000015597
1389206_PM_at	0.0186545	1.18038	up	---	---	---	gb:BE116867 /DB_XREF=gi:8508972 /DB_XREF=UI-R-BS1-azg-b-09-0-UI.s1 /CLONE=UI-R-BS1-azg-b-09-0-UI /FEA=EST /CNT=11 /TID=Rn.14665.1 /TIER=Stack /STK=8 /UG=Rn.14665 /UG_TITLE=ESTs	BE116867	---
1389216_PM_at	0.0335903	1.16986	down	---	---	---	gb:AW523499 /DB_XREF=gi:7165884 /DB_XREF=UI-R-BO0-aho-h-02-0-UI.s1 /CLONE=UI-R-BO0-aho-h-02-0-UI /FEA=EST /CNT=10 /TID=Rn.24190.1 /TIER=Stack /STK=8 /UG=Rn.24190 /UG_TITLE=ESTs	AW523499	---
1389220_PM_at	0.0295007	1.11162	down	LOC682679	hypothetical protein LOC682679	682679	gb:BE112918 /DB_XREF=gi:8505023 /DB_XREF=UI-R-BJ1-awa-d-03-0-UI.s1 /CLONE=UI-R-BJ1-awa-d-03-0-UI /FEA=EST /CNT=9 /TID=Rn.30073.1 /TIER=Stack /STK=8 /UG=Rn.30073 /UG_TITLE=ESTs	BE112918	---
1389296_PM_at	0.00244304	1.10798	down	Ttc35	tetratricopeptide repeat domain 35	362905	gb:AI104356 /DB_XREF=gi:3708727 /DB_XREF=EST213645 /CLONE=RHECC25 /FEA=EST /CNT=14 /TID=Rn.14286.1 /TIER=Stack /STK=7 /UG=Rn.14286 /UG_TITLE=ESTs, Highly similar to Y103_HUMAN HYPOTHETICAL PROTEIN KIAA0103 (H.sapiens)	AI104356	ENSRNOG00000005123
1389300_PM_at	0.0265471	1.11244	down	Lyrm1	LYR motif containing 1	365361	gb:AI410415 /DB_XREF=gi:4253919 /DB_XREF=EST238708 /CLONE=RHECS02 /FEA=EST /CNT=17 /TID=Rn.22356.1 /TIER=Stack /STK=7 /UG=Rn.22356 /UG_TITLE=ESTs, Moderately similar to YG01_HUMAN HYPOTHETICAL 14.3 KDA PROTEIN A-211C6.1 (H.sapiens)	AI410415	ENSRNOG00000024530
1389302_PM_at	0.0100727	1.19568	down	Ino80c	INO80 complex subunit C	291737	gb:BI289482 /DB_XREF=gi:14947098 /DB_XREF=UI-R-DK0-cfh-e-12-0-UI.s1 /CLONE=UI-R-DK0-cfh-e-12-0-UI /FEA=EST /CNT=15 /TID=Rn.22052.1 /TIER=Stack /STK=7 /UG=Rn.22052 /UG_TITLE=ESTs, Weakly similar to S30833 hypothetical protein YEL044w - yeast (Saccharomyces cerevisiae) (S.cerevisiae)	BI289482	ENSRNOG00000016532
1389325_PM_at	0.0134333	1.12321	down	Pdcd10	programmed cell death 10	494345	gb:AA848545 /DB_XREF=gi:2936085 /DB_XREF=EST191305 /CLONE=RKIAC95 /FEA=EST /CNT=11 /TID=Rn.1176.1 /TIER=Stack /STK=7 /UG=Rn.1176 /UG_TITLE=ESTs, Weakly similar to T19253 hypothetical protein C14A4.11 - Caenorhabditis elegans (C.elegans)	AA848545	ENSRNOG00000010147
1389326_PM_at	0.0460971	1.11214	down	Rfc3	replication factor C (activator 1) 3	288414	gb:AI103093 /DB_XREF=gi:3704824 /DB_XREF=EST212382 /CLONE=REMBX20 /FEA=EST /CNT=11 /TID=Rn.3711.1 /TIER=Stack /STK=7 /UG=Rn.3711 /UG_TITLE=ESTs, Highly similar to AC13_HUMAN ACTIVATOR 1 38 KD SUBUNIT (H.sapiens)	AI103093	ENSRNOG00000001088
1389342_PM_at	0.0353363	1.09705	up	Tal1	T-cell acute lymphocytic leukemia 1	313507	gb:AI112988 /DB_XREF=gi:3512937 /DB_XREF=UI-R-E1-go-h-08-0-UI.s1 /CLONE=UI-R-E1-go-h-08-0-UI /FEA=EST /CNT=11 /TID=Rn.9434.1 /TIER=Stack /STK=7 /UG=Rn.9434 /UG_TITLE=ESTs	AI112988	---
1389343_PM_at	0.00577975	1.09594	down	RGD1560187	similar to Hypothetical UPF0327 protein	362641	gb:H35203 /DB_XREF=gi:980620 /DB_XREF=EST106002 /CLONE=RPCAW26 /FEA=EST /CNT=11 /TID=Rn.14670.1 /TIER=Stack /STK=7 /UG=Rn.14670 /UG_TITLE=ESTs, Weakly similar to S78709 protein YCL057c-a - yeast (Saccharomyces cerevisiae) (S.cerevisiae)	H35203	---
1389384_PM_at	0.00665463	1.17041	down	Ndufaf4	NADH dehydrogenase (ubiquinone) 1 alpha subcomplex, assembly factor 4	362495	gb:BE111733 /DB_XREF=gi:8503838 /DB_XREF=UI-R-BJ1-avx-b-10-0-UI.s1 /CLONE=UI-R-BJ1-avx-b-10-0-UI /FEA=EST /CNT=9 /TID=Rn.17400.1 /TIER=Stack /STK=7 /UG=Rn.17400 /UG_TITLE=ESTs	BE111733	ENSRNOG00000007506
1389402_PM_at	0.0362045	1.19163	down	Csrnp1	cysteine-serine-rich nuclear protein 1	363165	gb:AI178746 /DB_XREF=gi:4135093 /DB_XREF=EST222428 /CLONE=RSPBK56 /FEA=EST /CNT=9 /TID=Rn.8793.1 /TIER=Stack /STK=7 /UG=Rn.8793 /UG_TITLE=ESTs	AI178746	---
1389406_PM_at	0.00555065	1.20819	down	rCG_40784	chromosome 1 open reading frame, human C6orf35	292228	gb:BI296349 /DB_XREF=gi:14960693 /DB_XREF=UI-R-DK0-cez-c-12-0-UI.s1 /CLONE=UI-R-DK0-cez-c-12-0-UI /FEA=EST /CNT=9 /TID=Rn.18853.1 /TIER=Stack /STK=7 /UG=Rn.18853 /UG_TITLE=ESTs	BI296349	---
1389419_PM_at	0.0201685	1.16469	down	---	---	---	gb:BI296079 /DB_XREF=gi:14960162 /DB_XREF=UI-R-DK0-cew-b-01-0-UI.s1 /CLONE=UI-R-DK0-cew-b-01-0-UI /FEA=EST /CNT=8 /TID=Rn.23543.1 /TIER=Stack /STK=7 /UG=Rn.23543 /UG_TITLE=ESTs, Weakly similar to OZF RAT ZINC FINGER PROTEIN OZF (R.norvegicus)	BI296079	---
1389448_PM_at	0.0223917	1.11232	down	2004-09-01	septin 4	287606	gb:AA800004 /DB_XREF=gi:2862959 /DB_XREF=EST189501 /CLONE=RHEAI19 /FEA=EST /CNT=8 /TID=Rn.6269.1 /TIER=Stack /STK=7 /UG=Rn.6269 /UG_TITLE=ESTs, Weakly similar to CDC10 (cell division cycle 10, S.cerevisiae, homolog) (Rattus norvegicus) (R.norvegicus)	AA800004	ENSRNOG00000007367
1389454_PM_at	0.0360479	1.07808	down	Pdcd5	programmed cell death 5	292814	gb:BF408447 /DB_XREF=gi:11396422 /DB_XREF=UI-R-BJ2-brc-h-02-0-UI.s1 /CLONE=UI-R-BJ2-brc-h-02-0-UI /FEA=EST /CNT=8 /TID=Rn.9535.1 /TIER=Stack /STK=7 /UG=Rn.9535 /UG_TITLE=ESTs, Highly similar to TF19 MOUSE TFAR19 PROTEIN (M.musculus)	BF408447	ENSRNOG00000013250
1389471_PM_at	0.0151299	1.13312	down	Tomm34	translocase of outer mitochondrial membrane 34	311621	gb:AI412736 /DB_XREF=gi:4256240 /DB_XREF=EST241035 /CLONE=RBRDT05 /FEA=EST /CNT=8 /TID=Rn.16749.1 /TIER=Stack /STK=7 /UG=Rn.16749 /UG_TITLE=ESTs	AI412736	ENSRNOG00000029799
1389477_PM_at	0.0104651	1.18682	down	---	---	---	gb:BI278855 /DB_XREF=gi:14926105 /DB_XREF=UI-R-CX0-bwx-g-01-0-UI.s1 /CLONE=UI-R-CX0-bwx-g-01-0-UI /FEA=EST /CNT=7 /TID=Rn.35620.1 /TIER=Stack /STK=7 /UG=Rn.35620 /UG_TITLE=ESTs	BI278855	---
1389510_PM_at	0.0327366	1.07594	down	Lyar	Ly1 antibody reactive homolog (mouse)	289707	gb:BE111765 /DB_XREF=gi:8503870 /DB_XREF=UI-R-BJ1-avx-e-10-0-UI.s1 /CLONE=UI-R-BJ1-avx-e-10-0-UI /FEA=EST /CNT=7 /TID=Rn.33249.1 /TIER=Stack /STK=7 /UG=Rn.33249 /UG_TITLE=ESTs, Moderately similar to CELL GROWTH REGULATING NUCLEOLAR PROTEIN (M.musculus)	BE111765	ENSRNOG00000005374
1389514_PM_at	0.0297856	1.17325	up	Lingo1	leucine rich repeat and Ig domain containing 1	315691	gb:AI711152 /DB_XREF=gi:5000928 /DB_XREF=UI-R-AD1-zo-g-06-0-UI.s1 /CLONE=UI-R-AD1-zo-g-06-0-UI /FEA=EST /CNT=7 /TID=Rn.20269.1 /TIER=Stack /STK=7 /UG=Rn.20269 /UG_TITLE=ESTs	AI711152	ENSRNOG00000017193
1389518_PM_at	0.00526029	1.06464	down	Tomm5	translocase of outer mitochondrial membrane 5 homolog (yeast)	680080	gb:AI009763 /DB_XREF=gi:3223595 /DB_XREF=EST204214 /CLONE=RLUBO19 /FEA=EST /CNT=31 /TID=Rn.7385.1 /TIER=Stack /STK=6 /UG=Rn.7385 /UG_TITLE=ESTs	AI009763	---
1389521_PM_at	0.0136625	1.08573	down	Ivns1abp	influenza virus NS1A binding protein	289089	gb:AI408553 /DB_XREF=gi:4252057 /DB_XREF=EST236843 /CLONE=ROVEQ57 /FEA=EST /CNT=32 /TID=Rn.36174.1 /TIER=Stack /STK=6 /UG=Rn.36174 /UG_TITLE=ESTs, Weakly similar to MIPP MOUSE MIPP PROTEIN (M.musculus)	AI408553	ENSRNOG00000002618
1389525_PM_at	0.0335524	1.09287	down	Rnf149	ring finger protein 149	363222	gb:AI171788 /DB_XREF=gi:4134664 /DB_XREF=EST217770 /CLONE=RMUBQ71 /FEA=EST /CNT=18 /TID=Rn.8015.1 /TIER=Stack /STK=6 /UG=Rn.8015 /UG_TITLE=ESTs	AI171788	ENSRNOG00000013946
1389527_PM_at	0.0397191	1.12156	down	LOC378467	promethin	378467	gb:BM384073 /DB_XREF=gi:18184126 /DB_XREF=UI-R-DZ0-cks-k-24-0-UI.s1 /CLONE=UI-R-DZ0-cks-k-24-0-UI /FEA=EST /CNT=15 /TID=Rn.7304.1 /TIER=Stack /STK=6 /UG=Rn.7304 /UG_TITLE=ESTs	BM384073	---
1389528_PM_s_at	0.0334696	1.25975	up	Jun	Jun oncogene	24516	gb:BI288619 /DB_XREF=gi:14945383 /DB_XREF=UI-R-DK0-cdd-a-04-0-UI.s1 /CLONE=UI-R-DK0-cdd-a-04-0-UI /FEA=EST /CNT=25 /TID=Rn.7672.1 /TIER=Stack /STK=6 /UG=Rn.7672 /UG_TITLE=ESTs	BI288619	---
1389537_PM_at	0.0495239	1.10102	down	Tcof1	Treacher Collins Franceschetti syndrome 1, homolog	291571	gb:AI502399 /DB_XREF=gi:4400250 /DB_XREF=UI-R-C0-jj-g-05-0-UI.s1 /CLONE=UI-R-C0-jj-g-05-0-UI /FEA=EST /CNT=19 /TID=Rn.7232.1 /TIER=Stack /STK=6 /UG=Rn.7232 /UG_TITLE=ESTs, Moderately similar to treacle (Mus musculus) (M.musculus)	AI502399	ENSRNOG00000026108
1389541_PM_at	0.0289262	1.12244	up	---	---	---	gb:AI410836 /DB_XREF=gi:4254340 /DB_XREF=EST239129 /CLONE=RHECZ92 /FEA=EST /CNT=12 /TID=Rn.30148.1 /TIER=Stack /STK=6 /UG=Rn.30148 /UG_TITLE=ESTs	AI410836	---
1389544_PM_at	0.0041736	1.09106	down	Tomm7	translocase of outer mitochondrial membrane 7 homolog (yeast)	685620	gb:BG669998 /DB_XREF=gi:13892097 /DB_XREF=DRNAANE06 /CLONE=DRNAANE06 /FEA=EST /CNT=12 /TID=Rn.17109.1 /TIER=Stack /STK=6 /UG=Rn.17109 /UG_TITLE=ESTs, Highly similar to OM07_HUMAN PROBABLE MITOCHONDRIAL IMPORT RECEPTOR SUBUNIT TOM7 HOMOLOG (TRANSLOCASE OF OUTER MEMBRANE 7 KDA SUBUNIT HOMOLOG) (PROTEIN AD-014) (H.sapiens)	BG669998	---
1389546_PM_at	0.00263052	1.15696	up	Amotl2	angiomotin like 2	65157	gb:BF418582 /DB_XREF=gi:11406571 /DB_XREF=UI-R-BJ2-bqh-f-03-0-UI.s1 /CLONE=UI-R-BJ2-bqh-f-03-0-UI /FEA=EST /CNT=14 /TID=Rn.25101.1 /TIER=Stack /STK=6 /UG=Rn.25101 /UG_TITLE=ESTs	BF418582	---
1389551_PM_at	0.00345998	1.19371	down	Lactb2	lactamase, beta 2	297768	gb:AI008160 /DB_XREF=gi:3221992 /DB_XREF=EST202611 /CLONE=REMAT70 /FEA=EST /CNT=11 /TID=Rn.1263.1 /TIER=Stack /STK=6 /UG=Rn.1263 /UG_TITLE=ESTs, Moderately similar to T44603 hypothetical protein CGI-83 (H.sapiens)	AI008160	ENSRNOG00000007829
1389566_PM_at	0.0199405	1.08485	down	Ccnb2	cyclin B2	363088	gb:AW253821 /DB_XREF=gi:6597412 /DB_XREF=UI-R-BJ0-acz-g-06-0-UI.s1 /CLONE=UI-R-BJ0-acz-g-06-0-UI /FEA=EST /CNT=10 /TID=Rn.23351.1 /TIER=Stack /STK=6 /UG=Rn.23351 /UG_TITLE=ESTs, Weakly similar to CGB1 RAT G2MITOTIC-SPECIFIC CYCLIN B1 (R.norvegicus)	AW253821	ENSRNOG00000012678
1389582_PM_at	0.000404924	1.16838	down	LOC683983	similar to Nucleoporin Nup43	683983	gb:AI407405 /DB_XREF=gi:4250909 /DB_XREF=EST235694 /CLONE=ROVED45 /FEA=EST /CNT=10 /TID=Rn.19234.1 /TIER=Stack /STK=6 /UG=Rn.19234 /UG_TITLE=ESTs, Weakly similar to retinoblastoma binding protein 7 (Rattus norvegicus) (R.norvegicus)	AI407405	---
1389586_PM_at	0.0280142	1.10233	up	---	---	---	gb:BE107169 /DB_XREF=gi:8499274 /DB_XREF=UI-R-BS1-ayq-f-06-0-UI.s1 /CLONE=UI-R-BS1-ayq-f-06-0-UI /FEA=EST /CNT=10 /TID=Rn.23464.1 /TIER=Stack /STK=6 /UG=Rn.23464 /UG_TITLE=ESTs	BE107169	---
1389595_PM_at	0.00911507	1.14819	down	Dus2l	dihydrouridine synthase 2-like, SMM1 homolog (S. cerevisiae)	291978	gb:BM386615 /DB_XREF=gi:18186668 /DB_XREF=UI-R-CN1-cjg-b-19-0-UI.s1 /CLONE=UI-R-CN1-cjg-b-19-0-UI /FEA=EST /CNT=9 /TID=Rn.18304.1 /TIER=Stack /STK=6 /UG=Rn.18304 /UG_TITLE=ESTs	BM386615	ENSRNOG00000019819
1389627_PM_at	0.0344012	1.09363	up	Znf746	zinc finger protein 746	312303	gb:BF550270 /DB_XREF=gi:11659958 /DB_XREF=UI-R-A1-ec-f-08-0-UI.r1 /CLONE=UI-R-A1-ec-f-08-0-UI /FEA=EST /CNT=8 /TID=Rn.8407.1 /TIER=Stack /STK=6 /UG=Rn.8407 /UG_TITLE=ESTs, Weakly similar to S25288 BTEB protein - rat (R.norvegicus)	BF550270	---
1389629_PM_at	0.0362621	1.05448	up	Prpf6	PRP6 pre-mRNA splicing factor 6 homolog (S. cerevisiae)	366276	gb:AA819400 /DB_XREF=gi:4228538 /DB_XREF=UI-R-A0-bl-e-04-0-UI.s1 /CLONE=UI-R-A0-bl-e-04-0-UI /FEA=EST /CNT=8 /TID=Rn.17062.1 /TIER=Stack /STK=6 /UG=Rn.17062 /UG_TITLE=ESTs, Highly similar to T46386 hypothetical protein DKFZp434P011.1 (H.sapiens)	AA819400	ENSRNOG00000015600
1389637_PM_at	0.00633419	1.18105	up	---	---	---	gb:AI227731 /DB_XREF=gi:3811618 /DB_XREF=EST224426 /CLONE=RBRCK74 /FEA=EST /CNT=8 /TID=Rn.24257.1 /TIER=Stack /STK=6 /UG=Rn.24257 /UG_TITLE=ESTs	AI227731	---
1389645_PM_at	0.0218604	1.14412	down	Prodh2	proline dehydrogenase (oxidase) 2	361538	gb:AI233266 /DB_XREF=gi:3817146 /DB_XREF=EST229954 /CLONE=RKIDC93 /FEA=EST /CNT=8 /TID=Rn.4247.1 /TIER=Stack /STK=6 /UG=Rn.4247 /UG_TITLE=ESTs, Weakly similar to PROD MOUSE PROLINE OXIDASE, MITOCHONDRIAL PRECURSOR (M.musculus)	AI233266	---
1389655_PM_at	0.00270013	1.16856	down	Ptrh2	peptidyl-tRNA hydrolase 2	287593	gb:AA892330 /DB_XREF=gi:3019209 /DB_XREF=EST196133 /CLONE=RKIAP15 /FEA=EST /CNT=8 /TID=Rn.13456.1 /TIER=Stack /STK=6 /UG=Rn.13456 /UG_TITLE=ESTs, Moderately similar to YCE7_HUMAN HYPOTHETICAL PROTEIN CGI-147 (H.sapiens)	AA892330	ENSRNOG00000004288
1389659_PM_at	0.00151743	1.1801	down	Ctla2a	cytotoxic T lymphocyte-associated protein 2 alpha	498690	gb:AI230591 /DB_XREF=gi:3814478 /DB_XREF=EST227286 /CLONE=REMCY64 /FEA=EST /CNT=8 /TID=Rn.7778.1 /TIER=Stack /STK=6 /UG=Rn.7778 /UG_TITLE=ESTs, Weakly similar to TES1 RAT TESTIN 12 PRECURSOR (R.norvegicus)	AI230591	ENSRNOG00000039971
1389661_PM_at	0.0448739	1.07177	down	Ptcd1	pentatricopeptide repeat domain 1	304278	gb:AI599413 /DB_XREF=gi:4608461 /DB_XREF=EST251116 /CLONE=REMEO14 /FEA=EST /CNT=8 /TID=Rn.8172.2 /TIER=Stack /STK=6 /UG=Rn.8172 /LL=89819 /UG_GENE=G10 /UG_TITLE=maternal G10 transcript	AI599413	---
1389668_PM_at	0.0138122	1.07553	down	Spc25	SPC25, NDC80 kinetochore complex component, homolog (S. cerevisiae)	295661	gb:AI408269 /DB_XREF=gi:4251773 /DB_XREF=EST236559 /CLONE=ROVET81 /FEA=EST /CNT=7 /TID=Rn.16268.1 /TIER=Stack /STK=6 /UG=Rn.16268 /UG_TITLE=ESTs	AI408269	ENSRNOG00000006731
1389670_PM_at	0.042929	1.29459	down	Hoxa10	homeo box A10	368057	gb:AI008960 /DB_XREF=gi:4132971 /DB_XREF=EST203411 /CLONE=REMBG17 /FEA=EST /CNT=7 /TID=Rn.6942.1 /TIER=Stack /STK=6 /UG=Rn.6942 /UG_TITLE=ESTs	AI008960	ENSRNOG00000007627
1389676_PM_at	0.0425233	1.13853	down	Ccdc101	coiled-coil domain containing 101	293488	gb:BI294925 /DB_XREF=gi:14957856 /DB_XREF=UI-R-DK0-ced-g-02-0-UI.s1 /CLONE=UI-R-DK0-ced-g-02-0-UI /FEA=EST /CNT=7 /TID=Rn.34983.1 /TIER=Stack /STK=6 /UG=Rn.34983 /UG_TITLE=ESTs, Weakly similar to T22B7.4.p (Caenorhabditis elegans) (C.elegans)	BI294925	ENSRNOG00000019245
1389694_PM_at	0.0488358	1.11412	down	Ky	kyphoscoliosis peptidase	315962	gb:BE111310 /DB_XREF=gi:8503415 /DB_XREF=UI-R-BJ1-ava-c-08-0-UI.s1 /CLONE=UI-R-BJ1-ava-c-08-0-UI /FEA=EST /CNT=7 /TID=Rn.19793.1 /TIER=Stack /STK=6 /UG=Rn.19793 /UG_TITLE=ESTs	BE111310	---
1389709_PM_at	0.00667383	1.12831	down	LOC499900	similar to Zinc finger protein 133	499900	gb:AI146063 /DB_XREF=gi:3667862 /DB_XREF=UI-R-BT0-qg-g-08-0-UI.s1 /CLONE=UI-R-BT0-qg-g-08-0-UI /FEA=EST /CNT=7 /TID=Rn.24021.1 /TIER=Stack /STK=6 /UG=Rn.24021 /UG_TITLE=ESTs, Weakly similar to OZF RAT ZINC FINGER PROTEIN OZF (R.norvegicus)	AI146063	ENSRNOG00000027955
1389735_PM_at	0.0211177	1.11675	down	Rps6ka6	ribosomal protein S6 kinase polypeptide 6	317203	gb:BE107296 /DB_XREF=gi:8499401 /DB_XREF=UI-R-BS1-ays-b-05-0-UI.s1 /CLONE=UI-R-BS1-ays-b-05-0-UI /FEA=EST /CNT=6 /TID=Rn.51151.1 /TIER=Stack /STK=6 /UG=Rn.51151 /UG_TITLE=ESTs	BE107296	---
[truncated: 1,319 more rows]
